# Supplementary material for: Experiment–theory hybrid method for studying the formation mechanism of atmospheric new particle formation
Source: Royal Society of Chemistry journal article supplement (doi:10.1039/d2cp03551k), 2022-01-01
Supplement: d2cp03551k1.pdf [file d2cp03551k1.pdf]

## Supplemental information

### **Experiment-Theory Hybrid Method for Studying Atmospheric New Particle Formation Mechanism**

Yi-Rong Liu,<sup>\*‡a</sup> Shuai Jiang,<sup>‡a</sup> Teng Huang,<sup>b</sup> Fan Zhang<sup>a</sup>

<sup>a</sup>School of Information Science and Technology, University of Science and Technology of China, Hefei, Anhui 230026, China

<sup>b</sup>Laboratory of Atmospheric Physico-Chemistry, Anhui Institute of Optics & Fine Mechanics, Chinese Academy of Sciences, Hefei, Anhui 230031, China

<sup>‡</sup>The two authors contributed equally to this work

<sup>\*</sup>Corresponding authors

E-mail: [yrliu@ustc.edu.cn](mailto:yrliu@ustc.edu.cn)

## Cluster concentration and formation rate simulation

The Atmospheric Cluster Dynamic Code (ACDC) is a general model for the simulation of the concentration and formation rate of cluster molecules without empirical parameters.<sup>1</sup> Input parameters come from quantum chemical calculations or experimental/field measurements. For example, the evaporation rate calculation for Gibbs free energy comes from ab initio calculations, while the monomer concentration, temperature, and condensation sink (CS) coefficients come from experimental/field measurements. To compare with the experimental or field measurements of the nucleation cluster concentration and formation rate at 1.7 nm, we extended the simulation box to eight sulfuric acid molecules-eight dimethylamine ((SA)<sub>8</sub>(DMA)<sub>8</sub>, the maximum size of the SA-DMA system)) and tetrasulfuric acid-tetramalic acid-tetradimethylamine ((SA)<sub>4</sub>(MA)<sub>4</sub>(DMA)<sub>4</sub>, the maximum size of the SA-MA-DMA system). The boxes of these two sizes can reach 1.7 nm, which can give the nucleation rate of the critical nucleus size, which is exactly the size of the nucleation cluster that can be observed in experiments or field measurements. In this way, we give a perfect one-to-one correspondence between the experimental and theoretical results, and thus provide a very powerful tool and method for atmospheric nucleation.

For comparison with experimental data, all parameters including temperature, monomer concentration and condensation sink (CS) are the same as CLOUD measurements and field observations. To reduce the computational cost, the simulation box of the SA-DMA system does not contain some clusters with extremely high evaporation rates. In addition, clusters larger than 1.7 nm are not included in the simulation box. For the SA-MA-DMA system, all clusters with up to four sulfuric acid molecules, four malic acid molecules, and four dimethylamine molecules were simulated except for some clusters with high evaporation rates and sizes greater than 1.7 nm.

Previous studies have shown that the SA-DMA system has a strong acid-base mechanism<sup>2</sup>, so the influence of water molecules on the formation rate and concentration of simulated SA-DMA clusters is relatively small. Therefore, water molecules are not considered in the model. The simulated cluster concentration labelled from N1 (monomer) to N8 (octamer) refers to the number of sulfuric acid molecules with different dimethylamine contents in the cluster, which can be directly compared with the CLOUD measurement and field observation results. The rate

of formation of dimer (N2) is simulated by considering condensation and evaporation outside the dimer "box".

Boundary conditions are very important for ACDC simulation. This requires that the cluster leaving the simulation framework be stable enough to grow. For the binary system of  $(SA)_n(DMA)_m$  ( $n=1-8$  and  $m=1-8$ ), the most stable clusters have roughly the same number of acids as base molecules or one or two more because these clusters have a high concentration and low evaporation rate. Therefore, assuming that  $(SA)_9(DMA)_9$  and  $(SA)_9(DMA)_8$  are stable enough to leave the simulation box, other clusters with high evaporation rates are brought back to the simulation box by monomer evaporation, and this boundary condition is consistent with the previous study.<sup>3</sup> For the  $(SA)_n(MA)_m(DMA)_k$  ( $n=1-4$ ,  $m=1-4$  and  $k=1-4$ ) ternary system, the main growth path is the SA-MA-DMA ternary system and pure MA system judged based on cluster stability. We consider clusters with evaporation rate lower than  $10^{-2} s^{-1}$  to be stable, and these low evaporation rate cluster information is displayed in Fig. S4. The  $(SA)_4(DMA)_4$ ,  $(SA)_4(MA)_4$  and  $(MA)_4(DMA)_4$  binary systems are not large enough to leave the simulation box. Therefore, only the SA-MA-DMA ternary system needs to be considered. The boundary conditions of the SA-DMA and SA-MA-DMA system simulation frames can be expressed as:

Two bodies:  $(SA)_a(DMA)_c$  with  $a=9-16$  and  $c=8-16$  and  $|a-c|=0$  or  $1$

Three bodies:  $(SA)_a(MA)_b(DMA)_c$  with  $a=b$  and  $a+b=c$  and  $c>4$

Supplementary figures

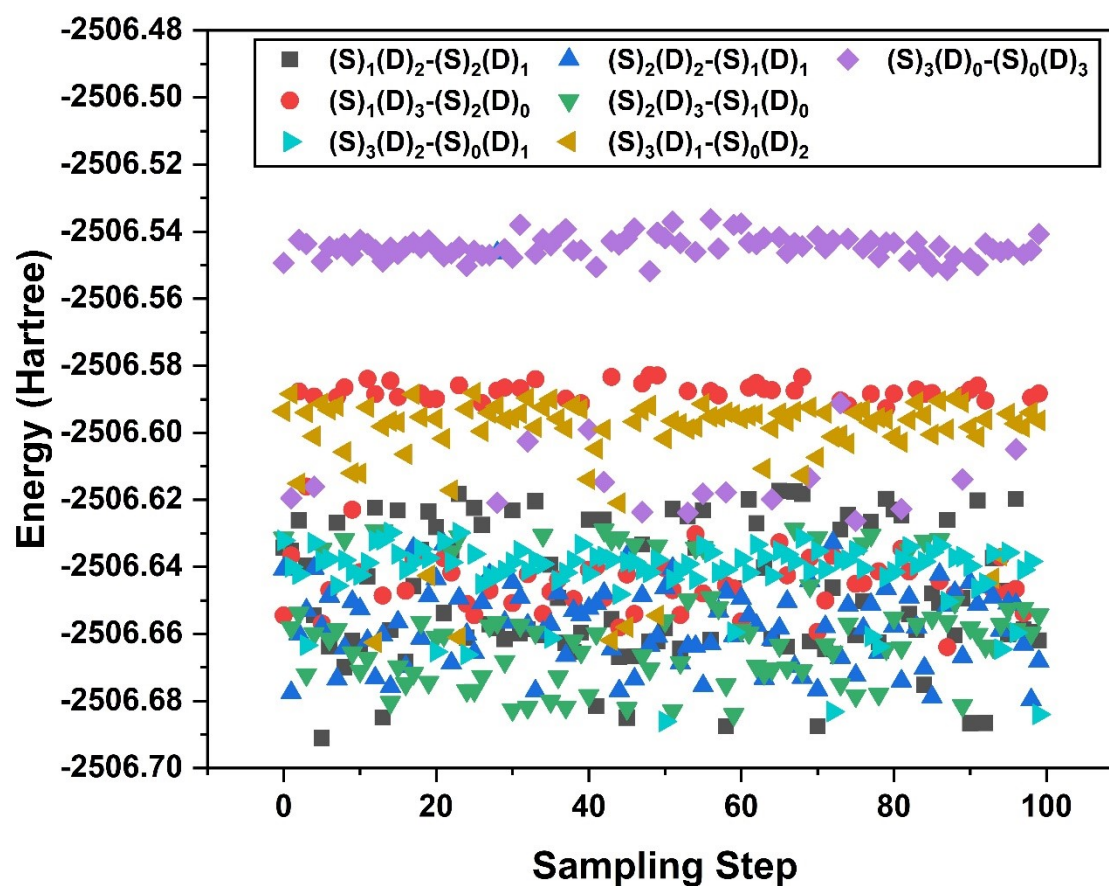

Fig. S1 The energy distribution of products produced by different collision reactions for the  $(SA)_i(DMA)_j + (SA)_m(DMA)_n \rightarrow (SA)_3(DMA)_3$  ( $i+m=3, j+n=3$ ) system. The S represents the sulfuric acid molecule, and D represents the dimethylamine molecule.

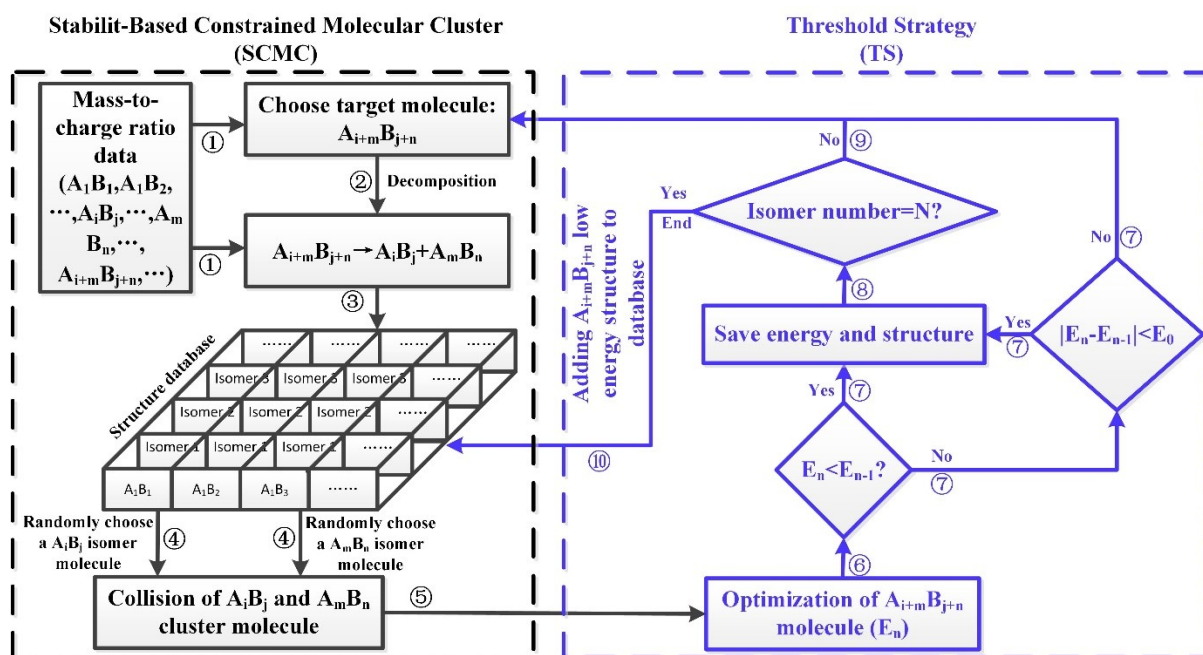

**Fig. S2** Flow chart of the Stability-based Constrained Molecular Cluster (SCMC) model for the nucleation system. As shown in the figure on the left (black dotted line), the target molecule is selected through the mass spectrum database, and then the target molecule is decomposed into two small molecules. These two small molecules can also be found in the mass spectrometry database, and then they are randomly selected from the structural database. The right side of the figure (blue dotted line) shows the threshold strategy, which represents a constraint that the new structure is rejected or accepted by a threshold.  $E_n$  and  $E_{n-1}$  represent the energy of this cycle and last cycle, respectively;  $E_0$  represents the empirical threshold, which is set from 0.2 to 0.5 Hartree; the total isomer value ( $N$ ) is typically set to 1000.

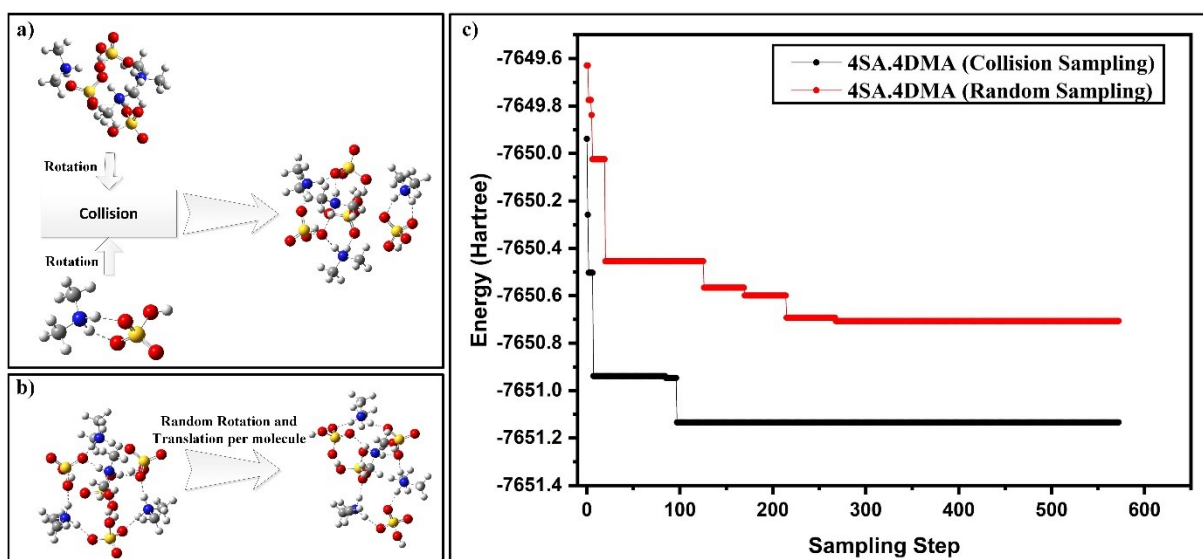

**Fig. S3** Collision sampling based on experimental data ( $3\text{SA.3DMA} + 1\text{SA.1DMA} \rightarrow 4\text{SA.4DMA}$ , upper left) and random sampling (randomly moving each molecule when sampling, under left) for the 4SA.4DMA system, and the cluster energy convergence comparison between the two sampling techniques (right). The test is based on the taboo accept strategy that only lower energy structure accepted when compared with the previous save structure.

## Tables

**Table S1.** The temperatures ( $T$ , K) and concentrations of DMA (molecules  $\text{cm}^{-3}$ ) in the studied cities.

| Cities   | Month | DMA concentration<br>( $\text{cm}^{-3}$ ) | $T$ (K) |
|----------|-------|-------------------------------------------|---------|
| Shanghai | 1     | $1.44 \times 10^8$                        | 275     |
|          | 2     | $1.50 \times 10^8$                        | 277     |
|          | 3     | $1.33 \times 10^8$                        | 282     |
|          | 4     | $2.35 \times 10^8$                        | 288     |
|          | 5     | $1.24 \times 10^8$                        | 294     |
|          | 6     | $3.21 \times 10^8$                        | 298     |
|          | 7     | $1.40 \times 10^8$                        | 301     |
|          | 8     | $2.18 \times 10^8$                        | 301     |
|          | 9     | $1.40 \times 10^8$                        | 296     |
|          | 10    | $2.08 \times 10^8$                        | 291     |
|          | 11    | $1.78 \times 10^8$                        | 284     |
|          | 12    | $3.57 \times 10^8$                        | 278     |
| Beijing  | 1     | $4.68 \times 10^8$                        | 265     |
|          | 2     | $4.31 \times 10^8$                        | 269     |
|          | 3     | $3.74 \times 10^8$                        | 275     |
|          | 4     | $3.13 \times 10^8$                        | 284     |
|          | 5     | $2.12 \times 10^8$                        | 291     |
|          | 6     | $2.22 \times 10^8$                        | 296     |
|          | 7     | $1.55 \times 10^8$                        | 298     |
|          | 8     | $2.56 \times 10^8$                        | 296     |
|          | 9     | $3.00 \times 10^8$                        | 291     |
|          | 10    | $3.63 \times 10^8$                        | 283     |
|          | 11    | $7.60 \times 10^8$                        | 274     |
|          | 12    | $5.18 \times 10^8$                        | 267     |

**Table S2.** The Gibbs free energies ( $\Delta G$ ) of formation from monomers at 254 K, 262 K and 278 K for all clusters used in ACDC simulations. The SA and DMA represent the sulfuric acid and dimethylamine in the cluster, respectively.

| Cluster                              | $\Delta G_{254\text{ K}}$<br>(kcal/mol) | $\Delta G_{262\text{ K}}$<br>(kcal/mol) | $\Delta G_{278\text{ K}}$<br>(kcal/mol) |
|--------------------------------------|-----------------------------------------|-----------------------------------------|-----------------------------------------|
| (SA) <sub>1</sub> (DMA) <sub>1</sub> | -13.73                                  | -13.48                                  | -12.98                                  |
| (SA) <sub>1</sub> (DMA) <sub>2</sub> | -21.04                                  | -20.53                                  | -19.49                                  |
| (SA) <sub>1</sub> (DMA) <sub>3</sub> | -26.60                                  | -25.76                                  | -24.08                                  |
| (SA) <sub>1</sub> (DMA) <sub>4</sub> | -29.52                                  | -28.33                                  | -25.96                                  |
| (SA) <sub>1</sub> (DMA) <sub>5</sub> | -30.81                                  | -29.43                                  | -26.68                                  |
| (SA) <sub>1</sub> (DMA) <sub>6</sub> | -27.09                                  | -25.46                                  | -22.21                                  |
| (SA) <sub>1</sub> (DMA) <sub>7</sub> | -31.21                                  | -29.35                                  | -25.63                                  |
| (SA) <sub>1</sub> (DMA) <sub>8</sub> | -31.04                                  | -28.93                                  | -24.71                                  |
| (DMA) <sub>2</sub>                   | 2.31                                    | 2.53                                    | 2.96                                    |
| (SA) <sub>2</sub>                    | -8.64                                   | -8.34                                   | -7.74                                   |
| (SA) <sub>2</sub> (DMA) <sub>1</sub> | -35.00                                  | -34.41                                  | -33.21                                  |
| (SA) <sub>2</sub> (DMA) <sub>2</sub> | -53.21                                  | -52.31                                  | -50.52                                  |
| (SA) <sub>2</sub> (DMA) <sub>3</sub> | -61.79                                  | -60.54                                  | -58.04                                  |
| (SA) <sub>2</sub> (DMA) <sub>4</sub> | -67.49                                  | -65.96                                  | -62.90                                  |
| (SA) <sub>2</sub> (DMA) <sub>5</sub> | -66.81                                  | -64.97                                  | -61.29                                  |
| (SA) <sub>2</sub> (DMA) <sub>6</sub> | -67.09                                  | -65.07                                  | -61.04                                  |
| (SA) <sub>2</sub> (DMA) <sub>7</sub> | -62.08                                  | -59.84                                  | -55.34                                  |
| (SA) <sub>2</sub> (DMA) <sub>8</sub> | -61.18                                  | -58.65                                  | -53.59                                  |
| (DMA) <sub>3</sub>                   | 1.91                                    | 2.38                                    | 3.33                                    |
| (SA) <sub>3</sub>                    | -17.14                                  | -16.54                                  | -15.32                                  |
| (SA) <sub>3</sub> (DMA) <sub>1</sub> | -48.52                                  | -47.62                                  | -45.81                                  |
| (SA) <sub>3</sub> (DMA) <sub>2</sub> | -67.57                                  | -66.35                                  | -63.91                                  |
| (SA) <sub>3</sub> (DMA) <sub>3</sub> | -90.16                                  | -88.57                                  | -85.37                                  |
| (SA) <sub>3</sub> (DMA) <sub>4</sub> | -102.69                                 | -100.82                                 | -97.08                                  |
| (SA) <sub>3</sub> (DMA) <sub>5</sub> | -94.51                                  | -92.38                                  | -88.12                                  |
| (SA) <sub>3</sub> (DMA) <sub>6</sub> | -95.49                                  | -93.13                                  | -88.42                                  |
| (SA) <sub>3</sub> (DMA) <sub>7</sub> | -91.59                                  | -89.10                                  | -84.12                                  |
| (SA) <sub>3</sub> (DMA) <sub>8</sub> | -91.51                                  | -88.77                                  | -83.31                                  |
| (DMA) <sub>4</sub>                   | 1.62                                    | 2.35                                    | 3.81                                    |
| (SA) <sub>4</sub>                    | -25.23                                  | -24.29                                  | -22.41                                  |
| (SA) <sub>4</sub> (DMA) <sub>1</sub> | -58.82                                  | -57.59                                  | -55.14                                  |
| (SA) <sub>4</sub> (DMA) <sub>2</sub> | -83.89                                  | -82.38                                  | -79.36                                  |
| (SA) <sub>4</sub> (DMA) <sub>3</sub> | -107.16                                 | -105.28                                 | -101.54                                 |
| (SA) <sub>4</sub> (DMA) <sub>4</sub> | -124.34                                 | -122.14                                 | -116.09                                 |
| (SA) <sub>4</sub> (DMA) <sub>5</sub> | -133.34                                 | -130.86                                 | -125.92                                 |
| (SA) <sub>4</sub> (DMA) <sub>6</sub> | -132.01                                 | -129.24                                 | -123.71                                 |



|                                      |         |         |         |
|--------------------------------------|---------|---------|---------|
| (SA) <sub>4</sub> (DMA) <sub>7</sub> | -133.94 | -130.99 | -125.09 |
| (SA) <sub>4</sub> (DMA) <sub>8</sub> | -132.46 | -129.24 | -122.79 |
| (DMA) <sub>5</sub>                   | 2.65    | 3.63    | 5.59    |
| (SA) <sub>5</sub>                    | -35.28  | -34.02  | -31.51  |
| (SA) <sub>5</sub> (DMA) <sub>1</sub> | -66.72  | -65.13  | -61.98  |
| (SA) <sub>5</sub> (DMA) <sub>2</sub> | -96.34  | -94.49  | -90.79  |
| (SA) <sub>5</sub> (DMA) <sub>3</sub> | -118.38 | -116.22 | -111.88 |
| (SA) <sub>5</sub> (DMA) <sub>4</sub> | -140.98 | -138.53 | -133.65 |
| (SA) <sub>5</sub> (DMA) <sub>5</sub> | -160.22 | -157.47 | -151.97 |
| (SA) <sub>5</sub> (DMA) <sub>6</sub> | -162.19 | -159.16 | -153.10 |
| (SA) <sub>5</sub> (DMA) <sub>7</sub> | -164.49 | -161.26 | -154.78 |
| (SA) <sub>5</sub> (DMA) <sub>8</sub> | -164.87 | -161.38 | -154.40 |
| (DMA) <sub>6</sub>                   | 4.53    | 5.77    | 8.25    |
| (SA) <sub>6</sub>                    | -47.29  | -45.71  | -42.54  |
| (SA) <sub>6</sub> (DMA) <sub>1</sub> | -77.89  | -76.03  | -72.32  |
| (SA) <sub>6</sub> (DMA) <sub>2</sub> | -104.82 | -102.61 | -98.19  |
| (SA) <sub>6</sub> (DMA) <sub>3</sub> | -133.97 | -131.46 | -126.45 |
| (SA) <sub>6</sub> (DMA) <sub>4</sub> | -155.08 | -152.28 | -146.67 |
| (SA) <sub>6</sub> (DMA) <sub>5</sub> | -174.69 | -171.57 | -165.34 |
| (SA) <sub>6</sub> (DMA) <sub>6</sub> | -193.58 | -190.15 | -183.28 |
| (SA) <sub>6</sub> (DMA) <sub>7</sub> | -195.66 | -192.03 | -184.77 |
| (SA) <sub>6</sub> (DMA) <sub>8</sub> | -197.24 | -193.29 | -185.39 |
| (DMA) <sub>7</sub>                   | 5.262   | 6.73    | 9.67    |
| (SA) <sub>7</sub>                    | -54.33  | -52.42  | -48.58  |
| (SA) <sub>7</sub> (DMA) <sub>1</sub> | -85.85  | -83.61  | -79.14  |
| (SA) <sub>7</sub> (DMA) <sub>2</sub> | -116.88 | -114.40 | -109.43 |
| (SA) <sub>7</sub> (DMA) <sub>3</sub> | -148.99 | -146.17 | -140.52 |
| (SA) <sub>7</sub> (DMA) <sub>4</sub> | -171.67 | -168.53 | -162.27 |
| (SA) <sub>7</sub> (DMA) <sub>5</sub> | -191.28 | -187.95 | -181.29 |
| (SA) <sub>7</sub> (DMA) <sub>6</sub> | -206.77 | -203.11 | -195.79 |
| (SA) <sub>7</sub> (DMA) <sub>7</sub> | -228.79 | -224.70 | -216.52 |
| (SA) <sub>7</sub> (DMA) <sub>8</sub> | -227.19 | -222.89 | -214.28 |
| (DMA) <sub>8</sub>                   | 7.22    | 8.95    | 12.41   |
| (SA) <sub>8</sub>                    | -59.31  | -57.17  | -52.91  |
| (SA) <sub>8</sub> (DMA) <sub>1</sub> | -98.45  | -95.91  | -90.83  |
| (SA) <sub>8</sub> (DMA) <sub>2</sub> | -126.03 | -123.19 | -117.51 |
| (SA) <sub>8</sub> (DMA) <sub>3</sub> | -155.11 | -151.97 | -145.69 |
| (SA) <sub>8</sub> (DMA) <sub>4</sub> | -186.29 | -182.87 | -176.03 |
| (SA) <sub>8</sub> (DMA) <sub>5</sub> | -205.93 | -202.21 | -194.77 |
| (SA) <sub>8</sub> (DMA) <sub>6</sub> | -224.67 | -220.58 | -212.41 |
| (SA) <sub>8</sub> (DMA) <sub>7</sub> | -242.19 | -237.81 | -229.03 |
| (SA) <sub>8</sub> (DMA) <sub>8</sub> | -261.21 | -256.52 | -247.17 |

**Table S3.** Gibbs free energies ( $\Delta G$ ) of formation from monomers at 276 K and 278 K for all clusters used in ACDC simulations. SA, MA and DMA represent sulfuric acid, malic acid and dimethylamine in the cluster, respectively.

| Cluster                                                  | $\Delta G_{276\text{ K}}$<br>(kcal/mol) | $\Delta G_{278\text{ K}}$<br>(kcal/mol) |
|----------------------------------------------------------|-----------------------------------------|-----------------------------------------|
| (MA) <sub>1</sub> .(DMA) <sub>1</sub>                    | -5.98                                   | -5.91                                   |
| (MA) <sub>1</sub> .(DMA) <sub>2</sub>                    | -10.56                                  | -10.42                                  |
| (MA) <sub>1</sub> .(DMA) <sub>3</sub>                    | -10.11                                  | -9.91                                   |
| (MA) <sub>1</sub> .(DMA) <sub>4</sub>                    | -9.72                                   | -9.45                                   |
| (SA) <sub>1</sub> .(DMA) <sub>1</sub>                    | -13.05                                  | -12.98                                  |
| (SA) <sub>1</sub> .(MA) <sub>1</sub>                     | -10.68                                  | -10.60                                  |
| (SA) <sub>1</sub> .(MA) <sub>1</sub> .(DMA) <sub>1</sub> | -24.03                                  | -23.87                                  |
| (SA) <sub>1</sub> .(MA) <sub>1</sub> .(DMA) <sub>2</sub> | -38.42                                  | -38.17                                  |
| (SA) <sub>1</sub> .(MA) <sub>1</sub> .(DMA) <sub>3</sub> | -47.38                                  | -47.05                                  |
| (SA) <sub>1</sub> .(MA) <sub>1</sub> .(DMA) <sub>4</sub> | -49.84                                  | -49.42                                  |
| (SA) <sub>1</sub> .(DMA) <sub>2</sub>                    | -19.62                                  | -19.49                                  |
| (SA) <sub>1</sub> .(MA) <sub>2</sub>                     | -18.47                                  | -18.28                                  |
| (SA) <sub>1</sub> .(MA) <sub>2</sub> .(DMA) <sub>1</sub> | -41.85                                  | -41.58                                  |
| (SA) <sub>1</sub> .(MA) <sub>2</sub> .(DMA) <sub>2</sub> | -44.57                                  | -44.24                                  |
| (SA) <sub>1</sub> .(MA) <sub>2</sub> .(DMA) <sub>3</sub> | -42.71                                  | -42.31                                  |
| (SA) <sub>1</sub> .(MA) <sub>2</sub> .(DMA) <sub>4</sub> | -42.17                                  | -41.69                                  |
| (SA) <sub>1</sub> .(DMA) <sub>3</sub>                    | -24.29                                  | -24.08                                  |
| (SA) <sub>1</sub> .(MA) <sub>3</sub>                     | -29.61                                  | -29.33                                  |
| (SA) <sub>1</sub> .(MA) <sub>3</sub> .(DMA) <sub>1</sub> | -47.26                                  | -46.91                                  |
| (SA) <sub>1</sub> .(MA) <sub>3</sub> .(DMA) <sub>2</sub> | -59.96                                  | -59.53                                  |
| (SA) <sub>1</sub> .(MA) <sub>3</sub> .(DMA) <sub>3</sub> | -60.47                                  | -59.98                                  |
| (SA) <sub>1</sub> .(MA) <sub>3</sub> .(DMA) <sub>4</sub> | -55.25                                  | -54.68                                  |
| (SA) <sub>1</sub> .(DMA) <sub>4</sub>                    | -26.26                                  | -25.96                                  |
| (SA) <sub>1</sub> .(MA) <sub>4</sub>                     | -33.16                                  | -32.79                                  |
| (SA) <sub>1</sub> .(MA) <sub>4</sub> .(DMA) <sub>1</sub> | -56.69                                  | -56.24                                  |
| (SA) <sub>1</sub> .(MA) <sub>4</sub> .(DMA) <sub>2</sub> | -68.85                                  | -68.31                                  |
| (SA) <sub>1</sub> .(MA) <sub>4</sub> .(DMA) <sub>3</sub> | -78.55                                  | -77.94                                  |
| (SA) <sub>1</sub> .(MA) <sub>4</sub> .(DMA) <sub>4</sub> | -77.71                                  | -77.03                                  |
| (DMA) <sub>2</sub>                                       | 2.91                                    | 2.96                                    |
| (MA) <sub>2</sub>                                        | -8.88                                   | -8.77                                   |
| (MA) <sub>2</sub> .(DMA) <sub>1</sub>                    | -18.63                                  | -18.45                                  |
| (MA) <sub>2</sub> .(DMA) <sub>2</sub>                    | -27.41                                  | -27.14                                  |
| (MA) <sub>2</sub> .(DMA) <sub>3</sub>                    | -25.63                                  | -25.29                                  |
| (MA) <sub>2</sub> .(DMA) <sub>4</sub>                    | -24.89                                  | -24.51                                  |
| (SA) <sub>2</sub>                                        | -7.82                                   | -7.74                                   |
| (SA) <sub>2</sub> .(DMA) <sub>1</sub>                    | -33.36                                  | -33.22                                  |

|                                                          |         |         |
|----------------------------------------------------------|---------|---------|
| (SA) <sub>2</sub> .(MA) <sub>1</sub>                     | -18.88  | -18.71  |
| (SA) <sub>2</sub> .(MA) <sub>1</sub> .(DMA) <sub>1</sub> | -41.25  | -40.99  |
| (SA) <sub>2</sub> .(MA) <sub>1</sub> .(DMA) <sub>2</sub> | -62.08  | -61.76  |
| (SA) <sub>2</sub> .(MA) <sub>1</sub> .(DMA) <sub>3</sub> | -66.28  | -65.88  |
| (SA) <sub>2</sub> .(MA) <sub>1</sub> .(DMA) <sub>4</sub> | -69.55  | -69.08  |
| (SA) <sub>2</sub> .(DMA) <sub>2</sub>                    | -50.74  | -50.52  |
| (SA) <sub>2</sub> .(MA) <sub>2</sub>                     | -33.21  | -32.94  |
| (SA) <sub>2</sub> .(MA) <sub>2</sub> .(DMA) <sub>1</sub> | -50.97  | -50.63  |
| (SA) <sub>2</sub> .(MA) <sub>2</sub> .(DMA) <sub>2</sub> | -75.15  | -74.72  |
| (SA) <sub>2</sub> .(MA) <sub>2</sub> .(DMA) <sub>3</sub> | -83.33  | -82.82  |
| (SA) <sub>2</sub> .(MA) <sub>2</sub> .(DMA) <sub>4</sub> | -99.25  | -98.66  |
| (SA) <sub>2</sub> .(DMA) <sub>3</sub>                    | -58.35  | -58.04  |
| (SA) <sub>2</sub> .(MA) <sub>3</sub>                     | -41.73  | -41.37  |
| (SA) <sub>2</sub> .(MA) <sub>3</sub> .(DMA) <sub>1</sub> | -56.53  | -56.11  |
| (SA) <sub>2</sub> .(MA) <sub>3</sub> .(DMA) <sub>2</sub> | -78.17  | -77.65  |
| (SA) <sub>2</sub> .(MA) <sub>3</sub> .(DMA) <sub>3</sub> | -88.59  | -88.02  |
| (SA) <sub>2</sub> .(MA) <sub>3</sub> .(DMA) <sub>4</sub> | -95.89  | -95.22  |
| (SA) <sub>2</sub> .(DMA) <sub>4</sub>                    | -63.28  | -62.91  |
| (SA) <sub>2</sub> .(MA) <sub>4</sub>                     | -44.93  | -44.47  |
| (SA) <sub>2</sub> .(MA) <sub>4</sub> .(DMA) <sub>1</sub> | -67.25  | -66.72  |
| (SA) <sub>2</sub> .(MA) <sub>4</sub> .(DMA) <sub>2</sub> | -87.65  | -87.03  |
| (SA) <sub>2</sub> .(MA) <sub>4</sub> .(DMA) <sub>3</sub> | -97.71  | -97.01  |
| (SA) <sub>2</sub> .(MA) <sub>4</sub> .(DMA) <sub>4</sub> | -99.47  | -98.68  |
| (DMA) <sub>3</sub>                                       | 3.22    | 3.34    |
| (MA) <sub>3</sub>                                        | -22.87  | -22.67  |
| (MA) <sub>3</sub> .(DMA) <sub>1</sub>                    | -27.15  | -26.87  |
| (MA) <sub>3</sub> .(DMA) <sub>2</sub>                    | -29.75  | -29.41  |
| (MA) <sub>3</sub> .(DMA) <sub>3</sub>                    | -27.25  | -26.84  |
| (MA) <sub>3</sub> .(DMA) <sub>4</sub>                    | -32.22  | -31.72  |
| (SA) <sub>3</sub>                                        | -15.48  | -15.33  |
| (SA) <sub>3</sub> .(DMA) <sub>1</sub>                    | -46.04  | -45.81  |
| (SA) <sub>3</sub> .(MA) <sub>1</sub>                     | -25.67  | -25.42  |
| (SA) <sub>3</sub> .(MA) <sub>1</sub> .(DMA) <sub>1</sub> | -53.35  | -53.02  |
| (SA) <sub>3</sub> .(MA) <sub>1</sub> .(DMA) <sub>2</sub> | -70.34  | -69.93  |
| (SA) <sub>3</sub> .(MA) <sub>1</sub> .(DMA) <sub>3</sub> | -88.19  | -87.71  |
| (SA) <sub>3</sub> .(MA) <sub>1</sub> .(DMA) <sub>4</sub> | -94.92  | -94.36  |
| (SA) <sub>3</sub> .(DMA) <sub>2</sub>                    | -64.21  | -63.91  |
| (SA) <sub>3</sub> .(MA) <sub>2</sub>                     | -33.13  | -32.78  |
| (SA) <sub>3</sub> .(MA) <sub>2</sub> .(DMA) <sub>1</sub> | -63.53  | -63.11  |
| (SA) <sub>3</sub> .(MA) <sub>2</sub> .(DMA) <sub>2</sub> | -82.82  | -82.33  |
| (SA) <sub>3</sub> .(MA) <sub>2</sub> .(DMA) <sub>3</sub> | -100.72 | -100.13 |
| (SA) <sub>3</sub> .(MA) <sub>2</sub> .(DMA) <sub>4</sub> | -115.12 | -114.45 |
| (SA) <sub>3</sub> .(DMA) <sub>3</sub>                    | -85.77  | -85.37  |

|                                                          |         |         |
|----------------------------------------------------------|---------|---------|
| (SA) <sub>3</sub> .(MA) <sub>3</sub>                     | -44.56  | -44.13  |
| (SA) <sub>3</sub> .(MA) <sub>3</sub> .(DMA) <sub>1</sub> | -65.72  | -65.18  |
| (SA) <sub>3</sub> .(MA) <sub>3</sub> .(DMA) <sub>2</sub> | -86.92  | -86.31  |
| (SA) <sub>3</sub> .(MA) <sub>3</sub> .(DMA) <sub>3</sub> | -102.34 | -101.69 |
| (SA) <sub>3</sub> .(MA) <sub>3</sub> .(DMA) <sub>4</sub> | -104.86 | -104.11 |
| (SA) <sub>3</sub> .(DMA) <sub>4</sub>                    | -97.54  | -97.07  |
| (SA) <sub>3</sub> .(MA) <sub>4</sub>                     | -55.88  | -55.33  |
| (SA) <sub>3</sub> .(MA) <sub>4</sub> .(DMA) <sub>1</sub> | -76.93  | -76.31  |
| (SA) <sub>3</sub> .(MA) <sub>4</sub> .(DMA) <sub>2</sub> | -96.95  | -96.25  |
| (SA) <sub>3</sub> .(MA) <sub>4</sub> .(DMA) <sub>3</sub> | -115.25 | -114.48 |
| (SA) <sub>3</sub> .(MA) <sub>4</sub> .(DMA) <sub>4</sub> | -113.53 | -112.68 |
| (DMA) <sub>4</sub>                                       | 3.63    | 3.81    |
| (MA) <sub>4</sub>                                        | -25.62  | -25.34  |
| (MA) <sub>4</sub> .(DMA) <sub>1</sub>                    | -32.18  | -31.82  |
| (MA) <sub>4</sub> .(DMA) <sub>2</sub>                    | -36.45  | -36.01  |
| (MA) <sub>4</sub> .(DMA) <sub>3</sub>                    | -41.73  | -41.21  |
| (MA) <sub>4</sub> .(DMA) <sub>4</sub>                    | -41.41  | -40.82  |
| (SA) <sub>4</sub>                                        | -22.64  | -22.41  |
| (SA) <sub>4</sub> .(DMA) <sub>1</sub>                    | -55.45  | -55.14  |
| (SA) <sub>4</sub> .(MA) <sub>1</sub>                     | -34.09  | -33.76  |
| (SA) <sub>4</sub> .(MA) <sub>1</sub> .(DMA) <sub>1</sub> | -65.63  | -65.21  |
| (SA) <sub>4</sub> .(MA) <sub>1</sub> .(DMA) <sub>2</sub> | -89.78  | -89.31  |
| (SA) <sub>4</sub> .(MA) <sub>1</sub> .(DMA) <sub>3</sub> | -108.35 | -107.79 |
| (SA) <sub>4</sub> .(MA) <sub>1</sub> .(DMA) <sub>4</sub> | -116.96 | -116.31 |
| (SA) <sub>4</sub> .(DMA) <sub>2</sub>                    | -79.74  | -79.36  |
| (SA) <sub>4</sub> .(MA) <sub>2</sub>                     | -41.73  | -41.28  |
| (SA) <sub>4</sub> .(MA) <sub>2</sub> .(DMA) <sub>1</sub> | -70.88  | -70.38  |
| (SA) <sub>4</sub> .(MA) <sub>2</sub> .(DMA) <sub>2</sub> | -95.08  | -94.51  |
| (SA) <sub>4</sub> .(MA) <sub>2</sub> .(DMA) <sub>3</sub> | -116.24 | -115.59 |
| (SA) <sub>4</sub> .(MA) <sub>2</sub> .(DMA) <sub>4</sub> | -120.91 | -120.19 |
| (SA) <sub>4</sub> .(DMA) <sub>3</sub>                    | -102.01 | -101.54 |
| (SA) <sub>4</sub> .(MA) <sub>3</sub>                     | -51.14  | -50.63  |
| (SA) <sub>4</sub> .(MA) <sub>3</sub> .(DMA) <sub>1</sub> | -79.44  | -78.84  |
| (SA) <sub>4</sub> .(MA) <sub>3</sub> .(DMA) <sub>2</sub> | -97.23  | -96.55  |
| (SA) <sub>4</sub> .(MA) <sub>3</sub> .(DMA) <sub>3</sub> | -113.19 | -112.44 |
| (SA) <sub>4</sub> .(MA) <sub>3</sub> .(DMA) <sub>4</sub> | -148.96 | -148.12 |
| (SA) <sub>4</sub> .(DMA) <sub>4</sub>                    | -118.28 | -117.73 |
| (SA) <sub>4</sub> .(MA) <sub>4</sub>                     | -64.64  | -64.02  |
| (SA) <sub>4</sub> .(MA) <sub>4</sub> .(DMA) <sub>1</sub> | -89.05  | -88.35  |
| (SA) <sub>4</sub> .(MA) <sub>4</sub> .(DMA) <sub>2</sub> | -111.86 | -111.07 |
| (SA) <sub>4</sub> .(MA) <sub>4</sub> .(DMA) <sub>3</sub> | -138.98 | -138.12 |
| (SA) <sub>4</sub> .(MA) <sub>4</sub> .(DMA) <sub>4</sub> | -142.18 | -141.25 |

**Table S4.** Low evaporation rate cluster information for SA-MA-DMA system at 276 K. SA, MA and DMA represent sulfuric acid, malic acid and dimethylamine in the cluster, respectively

| Cluster                                                | Evaporation rate (s <sup>-1</sup> ) |
|--------------------------------------------------------|-------------------------------------|
| (SA) <sub>3</sub> (DMA) <sub>3</sub>                   | 2.16×10 <sup>-7</sup>               |
| (SA) <sub>2</sub> (DMA) <sub>1</sub>                   | 8.64×10 <sup>-7</sup>               |
| (SA) <sub>1</sub> (MA) <sub>2</sub> (DMA) <sub>1</sub> | 9.62×10 <sup>-5</sup>               |
| (SA) <sub>2</sub> (DMA) <sub>2</sub>                   | 2.76×10 <sup>-4</sup>               |
| (SA) <sub>4</sub> (DMA) <sub>3</sub>                   | 2.05×10 <sup>-3</sup>               |
| (SA) <sub>4</sub> (DMA) <sub>4</sub>                   | 3.52×10 <sup>-3</sup>               |
| (SA) <sub>2</sub> (MA) <sub>2</sub> (DMA) <sub>4</sub> | 5.74×10 <sup>-3</sup>               |
| (SA) <sub>1</sub> (MA) <sub>1</sub> (DMA) <sub>2</sub> | 6.95×10 <sup>-2</sup>               |
| (MA) <sub>3</sub>                                      | 9.50×10 <sup>-2</sup>               |

Coordinate information for SA-DMA system

1DMA

|   |           |           |           |
|---|-----------|-----------|-----------|
| C | -1.215409 | -0.222460 | 0.020279  |
| N | -0.000001 | 0.563873  | -0.148568 |
| C | 1.215399  | -0.222459 | 0.020275  |
| H | -1.281702 | -0.967127 | -0.779310 |
| H | -2.089737 | 0.427627  | -0.062971 |
| H | -1.276324 | -0.763900 | 0.982026  |
| H | -0.000006 | 1.329153  | 0.517117  |
| H | 1.282043  | -0.966764 | -0.779628 |
| H | 1.276085  | -0.764314 | 0.981807  |
| H | 2.089706  | 0.427733  | -0.062391 |

1SA

|   |           |           |           |
|---|-----------|-----------|-----------|
| S | 0.000000  | 0.000000  | 0.165250  |
| O | 0.000000  | 1.262810  | 0.826070  |
| O | 0.000000  | -1.262810 | 0.826070  |
| O | 1.247360  | -0.047260 | -0.851640 |
| O | -1.247360 | 0.047260  | -0.851640 |
| H | -1.456140 | -0.860950 | -1.117450 |
| H | 1.456140  | 0.860950  | -1.117450 |

1SA1DMA

|   |           |           |           |
|---|-----------|-----------|-----------|
| S | -1.285695 | -0.159856 | 0.012831  |
| O | -2.469759 | -0.978144 | -0.010158 |
| O | -0.456470 | -0.216358 | 1.230023  |
| O | -0.439366 | -0.260000 | -1.202805 |
| O | -1.798478 | 1.405750  | 0.038194  |
| H | 1.159509  | -0.130108 | -0.760661 |
| H | -2.597751 | 1.440414  | -0.504032 |
| C | 2.856127  | -1.140608 | -0.007352 |
| N | 1.882379  | -0.026852 | 0.007616  |
| C | 2.459777  | 1.337215  | -0.016000 |
| H | 2.305239  | -2.079844 | 0.010481  |
| H | 3.502744  | -1.077887 | 0.868351  |
| H | 3.459671  | -1.087947 | -0.913816 |
| H | 1.202156  | -0.116481 | 0.805054  |
| H | 1.639083  | 2.052892  | -0.000362 |
| H | 3.047537  | 1.470524  | -0.924437 |
| H | 3.093436  | 1.484477  | 0.858901  |

1SA2DMA

|   |          |           |           |
|---|----------|-----------|-----------|
| C | 2.927949 | -1.496911 | 1.086988  |
| N | 3.032429 | -0.427463 | 0.085205  |
| C | 4.192494 | -0.558135 | -0.802986 |
| H | 2.771776 | -2.452110 | 0.579774  |
| H | 2.066055 | -1.301894 | 1.726259  |

|   |           |           |           |
|---|-----------|-----------|-----------|
| H | 3.827299  | -1.578738 | 1.711332  |
| H | 3.055067  | 0.472533  | 0.560350  |
| H | 4.095913  | -1.472730 | -1.392975 |
| H | 5.142557  | -0.601233 | -0.253859 |
| H | 4.220051  | 0.289623  | -1.489369 |
| S | -0.000082 | 1.011879  | -0.000636 |
| O | 1.007895  | 1.725579  | 0.742500  |
| O | -1.007679 | 1.724488  | -0.745341 |
| O | 0.713128  | 0.035753  | -1.009507 |
| O | -0.713814 | 0.038360  | 1.010390  |
| H | 1.657901  | -0.215288 | -0.625801 |
| H | -1.658280 | -0.213726 | 0.626741  |
| C | -2.926785 | -1.501527 | -1.082857 |
| N | -3.032104 | -0.428212 | -0.085317 |
| C | -4.193410 | -0.554941 | 0.801806  |
| H | -2.063721 | -1.309592 | -1.721489 |
| H | -3.825195 | -1.585111 | -1.708323 |
| H | -2.772113 | -2.454897 | -0.571750 |
| H | -3.053685 | 0.470009  | -0.563869 |
| H | -4.221481 | 0.295460  | 1.484892  |
| H | -4.098065 | -1.467310 | 1.395434  |
| H | -5.142770 | -0.599693 | 0.251589  |

#### 1SA3DMA

|   |           |           |           |
|---|-----------|-----------|-----------|
| C | 1.778445  | 2.389059  | 1.140982  |
| N | 2.396783  | 1.572592  | 0.090142  |
| C | 3.567028  | 2.211659  | -0.514627 |
| H | 2.445940  | 2.454006  | 2.006377  |
| H | 0.837788  | 1.927216  | 1.442269  |
| H | 1.560877  | 3.412760  | 0.803324  |
| H | 1.698065  | 1.382262  | -0.632203 |
| H | 4.370167  | 2.298913  | 0.223804  |
| H | 3.350693  | 3.220294  | -0.896414 |
| H | 3.930287  | 1.603881  | -1.346201 |
| C | 2.738618  | -1.677755 | 1.900130  |
| N | 2.314496  | -1.220363 | 0.560602  |
| C | 2.974016  | -1.916612 | -0.570182 |
| H | 2.520594  | -2.740541 | 2.011271  |
| H | 2.185830  | -1.119457 | 2.655214  |
| H | 3.808747  | -1.510276 | 2.033520  |
| H | 2.463570  | -0.169303 | 0.459190  |
| H | 2.757221  | -2.983835 | -0.513214 |
| H | 4.052999  | -1.757027 | -0.529911 |
| H | 2.558214  | -1.510456 | -1.490417 |
| S | -0.622342 | -0.439468 | -0.917149 |

|   |           |           |           |
|---|-----------|-----------|-----------|
| O | 0.580722  | -0.001557 | -1.629474 |
| O | -1.754127 | -0.847484 | -1.728624 |
| O | -0.276994 | -1.447460 | 0.132886  |
| O | -1.074599 | 0.878772  | -0.097318 |
| H | 1.253473  | -1.347186 | 0.445158  |
| H | -2.048253 | 0.755406  | 0.155643  |
| C | -3.780858 | -0.689531 | 1.473407  |
| N | -3.661968 | 0.227367  | 0.337379  |
| C | -4.752069 | 1.197323  | 0.243789  |
| H | -2.954305 | -1.401087 | 1.442403  |
| H | -4.731012 | -1.244258 | 1.480399  |
| H | -3.712445 | -0.123033 | 2.406785  |
| H | -3.592735 | -0.310778 | -0.524792 |
| H | -4.619518 | 1.807275  | -0.651739 |
| H | -4.729176 | 1.860492  | 1.113291  |
| H | -5.745819 | 0.726036  | 0.203025  |

#### 1SA4DMA

|   |           |           |           |
|---|-----------|-----------|-----------|
| C | 3.297109  | 2.148105  | 1.572041  |
| N | 2.901414  | 1.412050  | 0.372916  |
| C | 3.468472  | 1.974998  | -0.856642 |
| H | 4.374459  | 2.046648  | 1.740222  |
| H | 2.777169  | 1.742812  | 2.443860  |
| H | 3.071436  | 3.224688  | 1.509976  |
| H | 1.878978  | 1.424497  | 0.282633  |
| H | 4.553485  | 1.824484  | -0.876427 |
| H | 3.278098  | 3.055421  | -0.951182 |
| H | 3.014020  | 1.465824  | -1.706390 |
| C | -2.853111 | -1.938295 | 1.456898  |
| N | -3.378007 | -1.165867 | 0.326855  |
| C | -4.708229 | -1.598691 | -0.095814 |
| H | -3.411749 | -1.701419 | 2.369247  |
| H | -1.800182 | -1.688497 | 1.593099  |
| H | -2.923323 | -3.024259 | 1.290865  |
| H | -2.714825 | -1.240048 | -0.451230 |
| H | -5.440413 | -1.390923 | 0.691619  |
| H | -4.756851 | -2.675448 | -0.320852 |
| H | -5.008069 | -1.050982 | -0.992410 |
| C | -2.792617 | 2.359298  | 1.500552  |
| N | -2.535732 | 1.561720  | 0.287222  |
| C | -3.003273 | 2.182397  | -0.972833 |
| H | -2.284608 | 3.321869  | 1.422557  |
| H | -2.403613 | 1.821971  | 2.365515  |
| H | -3.864147 | 2.526666  | 1.629594  |
| H | -2.965400 | 0.597238  | 0.380234  |



|         |           |           |           |
|---------|-----------|-----------|-----------|
| H       | -2.500928 | 3.141022  | -1.110703 |
| H       | -4.084365 | 2.335935  | -0.942782 |
| H       | -2.728231 | 1.510195  | -1.783860 |
| S       | 0.015464  | -0.262618 | -0.909864 |
| O       | -1.298174 | -0.430507 | -1.565849 |
| O       | 1.151464  | -0.170372 | -1.837438 |
| O       | -0.035485 | 1.021690  | -0.065798 |
| O       | 0.247645  | -1.408729 | 0.060061  |
| H       | -1.458113 | 1.363362  | 0.178847  |
| H       | 1.724982  | -1.511760 | 0.256617  |
| C       | 3.238840  | -2.042925 | 1.644839  |
| N       | 2.817720  | -1.452996 | 0.360369  |
| C       | 3.440215  | -2.065052 | -0.835351 |
| H       | 2.716235  | -1.534542 | 2.455138  |
| H       | 4.316820  | -1.933379 | 1.782029  |
| H       | 2.978671  | -3.102311 | 1.665158  |
| H       | 2.990876  | -0.406271 | 0.368127  |
| H       | 2.998079  | -1.588079 | -1.708119 |
| H       | 3.215569  | -3.132799 | -0.850493 |
| H       | 4.522725  | -1.920055 | -0.814546 |
| 1SA5DMA |           |           |           |
| C       | -0.660373 | 4.223989  | -1.356044 |
| N       | -0.692428 | 3.468658  | -0.106318 |
| C       | -0.000174 | 4.160780  | 0.975859  |
| H       | -1.246140 | 5.143561  | -1.251318 |
| H       | -1.104983 | 3.630569  | -2.158229 |
| H       | 0.356795  | 4.511696  | -1.671278 |
| H       | -0.261683 | 2.557033  | -0.252741 |
| H       | -0.538232 | 5.078340  | 1.237290  |
| H       | 1.036998  | 4.445752  | 0.728090  |
| H       | 0.029056  | 3.524740  | 1.864205  |
| C       | 3.399251  | 1.543695  | 1.901789  |
| N       | 3.006680  | 0.930318  | 0.638232  |
| C       | 3.530058  | 1.637368  | -0.530082 |
| H       | 4.483081  | 1.462939  | 2.035078  |
| H       | 2.920788  | 1.019713  | 2.733290  |
| H       | 3.137170  | 2.613415  | 1.973054  |
| H       | 1.990409  | 0.891853  | 0.566790  |
| H       | 4.618953  | 1.528622  | -0.575650 |
| H       | 3.304410  | 2.717367  | -0.518875 |
| H       | 3.094126  | 1.201589  | -1.429599 |
| C       | -2.517423 | -2.991737 | 1.362792  |
| N       | -3.126329 | -2.152926 | 0.324619  |
| C       | -4.421499 | -2.661126 | -0.130959 |

|         |           |           |           |
|---------|-----------|-----------|-----------|
| H       | -3.100593 | -2.925680 | 2.287030  |
| H       | -1.501142 | -2.644013 | 1.549853  |
| H       | -2.465417 | -4.050658 | 1.069927  |
| H       | -2.482612 | -2.091721 | -0.467550 |
| H       | -5.152176 | -2.605861 | 0.682037  |
| H       | -4.373904 | -3.706985 | -0.469050 |
| H       | -4.785972 | -2.051424 | -0.960622 |
| C       | -2.896854 | 1.293452  | 1.865712  |
| N       | -2.662073 | 0.641664  | 0.557956  |
| C       | -3.345931 | 1.311105  | -0.578668 |
| H       | -2.547758 | 2.324000  | 1.807489  |
| H       | -2.339566 | 0.757749  | 2.634045  |
| H       | -3.961113 | 1.272020  | 2.105080  |
| H       | -2.942580 | -0.383681 | 0.581250  |
| H       | -2.993395 | 2.340824  | -0.626454 |
| H       | -4.425946 | 1.280484  | -0.424457 |
| H       | -3.070517 | 0.776805  | -1.485910 |
| S       | 0.063824  | -0.648338 | -1.058142 |
| O       | -1.263176 | -0.903258 | -1.625250 |
| O       | 1.149611  | -0.432259 | -1.996304 |
| O       | -0.022882 | 0.467896  | -0.042288 |
| O       | 0.389130  | -1.955894 | -0.211664 |
| H       | -1.623172 | 0.625435  | 0.355274  |
| H       | 1.423350  | -2.026989 | -0.027807 |
| C       | 3.353289  | -2.879009 | 1.387056  |
| N       | 2.961260  | -2.097273 | 0.213547  |
| C       | 3.607135  | -2.543265 | -1.026179 |
| H       | 2.876473  | -2.464159 | 2.277812  |
| H       | 4.441220  | -2.889435 | 1.547313  |
| H       | 3.018412  | -3.914082 | 1.272877  |
| H       | 3.169182  | -1.101092 | 0.375850  |
| H       | 3.267355  | -1.908786 | -1.844617 |
| H       | 3.307512  | -3.572415 | -1.244235 |
| H       | 4.704315  | -2.510597 | -0.964823 |
| 1SA6DMA |           |           |           |
| C       | 4.546330  | -1.975829 | -1.607954 |
| N       | 4.949161  | -1.162256 | -0.455048 |
| C       | 4.996106  | 0.268032  | -0.779142 |
| H       | 3.527583  | -1.702969 | -1.887957 |
| H       | 4.562215  | -3.034181 | -1.334269 |
| H       | 5.198688  | -1.835070 | -2.485367 |
| H       | 5.867485  | -1.461796 | -0.141350 |
| H       | 3.989024  | 0.598663  | -1.038794 |
| H       | 5.667174  | 0.498646  | -1.622894 |

|   |           |           |           |
|---|-----------|-----------|-----------|
| H | 5.335850  | 0.831272  | 0.094160  |
| C | -3.330912 | -2.166191 | -2.571791 |
| N | -3.433120 | -2.768501 | -1.237598 |
| C | -2.262152 | -3.595059 | -0.917119 |
| H | -2.460647 | -1.508977 | -2.590990 |
| H | -4.226290 | -1.572591 | -2.777093 |
| H | -3.219878 | -2.912938 | -3.375108 |
| H | -4.264634 | -3.351018 | -1.203405 |
| H | -1.382353 | -2.954758 | -0.839437 |
| H | -2.063786 | -4.371690 | -1.673665 |
| H | -2.414293 | -4.086435 | 0.047436  |
| C | 0.721351  | 4.533041  | -1.549904 |
| N | 0.379066  | 4.021486  | -0.226397 |
| C | 1.098889  | 4.713800  | 0.836903  |
| H | 0.357041  | 5.560379  | -1.660336 |
| H | 0.242709  | 3.921373  | -2.318207 |
| H | 1.806036  | 4.541316  | -1.752883 |
| H | 0.595614  | 3.026079  | -0.181929 |
| H | 0.770638  | 5.757509  | 0.895145  |
| H | 2.194224  | 4.719295  | 0.698855  |
| H | 0.883565  | 4.239946  | 1.797933  |
| C | -2.710661 | -1.247606 | 2.113154  |
| N | -3.563474 | -0.690099 | 1.054315  |
| C | -4.974604 | -0.642442 | 1.442207  |
| H | -2.722324 | -0.588441 | 2.988019  |
| H | -1.685314 | -1.327758 | 1.748019  |
| H | -3.046146 | -2.242475 | 2.443100  |
| H | -3.478982 | -1.300150 | 0.227719  |
| H | -5.113621 | 0.049644  | 2.279009  |
| H | -5.366144 | -1.623209 | 1.753620  |
| H | -5.577268 | -0.286798 | 0.602936  |
| C | -2.467508 | 2.758039  | 1.370994  |
| N | -2.281406 | 1.734070  | 0.316703  |
| C | -2.675184 | 2.198712  | -1.036136 |
| H | -1.849673 | 3.620931  | 1.120449  |
| H | -2.149596 | 2.341739  | 2.326887  |
| H | -3.519201 | 3.043864  | 1.428856  |
| H | -2.812712 | 0.842531  | 0.563561  |
| H | -2.112405 | 3.102541  | -1.267396 |
| H | -3.746189 | 2.409311  | -1.054067 |
| H | -2.421561 | 1.411973  | -1.742972 |
| S | 0.440198  | -0.164300 | -0.662570 |
| O | -0.781813 | -0.331232 | -1.446304 |
| O | 1.691873  | -0.146265 | -1.403132 |

|   |           |           |          |
|---|-----------|-----------|----------|
| O | 0.318664  | 1.018707  | 0.256401 |
| O | 0.462566  | -1.443550 | 0.303375 |
| H | -1.258809 | 1.456045  | 0.290974 |
| H | 1.367155  | -1.490372 | 0.805573 |
| C | 2.732322  | -0.409792 | 2.578197 |
| N | 2.742417  | -1.543183 | 1.648937 |
| C | 2.955763  | -2.827906 | 2.316134 |
| H | 2.558366  | 0.510236  | 2.019039 |
| H | 3.668890  | -0.318349 | 3.148463 |
| H | 1.910517  | -0.526875 | 3.290854 |
| H | 3.486222  | -1.401501 | 0.949681 |
| H | 2.997971  | -3.623307 | 1.569164 |
| H | 2.120593  | -3.040934 | 2.990111 |
| H | 3.883833  | -2.854599 | 2.907296 |

1SA7DMA

|   |           |           |           |
|---|-----------|-----------|-----------|
| C | -5.431698 | 1.727936  | -1.483582 |
| N | -4.322768 | 1.797468  | -0.537966 |
| C | -4.035060 | 3.160041  | -0.097908 |
| H | -6.363789 | 2.021039  | -0.989077 |
| H | -5.548286 | 0.701538  | -1.838797 |
| H | -5.300531 | 2.382415  | -2.361877 |
| H | -3.481228 | 1.402712  | -0.958090 |
| H | -4.874332 | 3.549490  | 0.488235  |
| H | -3.856557 | 3.859755  | -0.931509 |
| H | -3.147229 | 3.154744  | 0.537898  |
| C | 0.377781  | -4.087536 | 2.069626  |
| N | 0.840729  | -2.715625 | 2.235626  |
| C | 0.605373  | -2.206802 | 3.581298  |
| H | 0.979348  | -4.764475 | 2.686172  |
| H | 0.492310  | -4.392489 | 1.026652  |
| H | -0.679725 | -4.236457 | 2.352600  |
| H | 0.371800  | -2.119345 | 1.555469  |
| H | 1.240777  | -2.736495 | 4.299684  |
| H | -0.440291 | -2.319456 | 3.919651  |
| H | 0.857785  | -1.145804 | 3.622830  |
| C | 2.493719  | 3.676228  | -1.762900 |
| N | 2.815389  | 3.829330  | -0.340778 |
| C | 1.655457  | 4.278357  | 0.438398  |
| H | 1.725551  | 2.907747  | -1.864528 |
| H | 3.385213  | 3.358497  | -2.310689 |
| H | 2.116355  | 4.602786  | -2.225901 |
| H | 3.563434  | 4.509311  | -0.242313 |
| H | 0.889471  | 3.501935  | 0.401221  |
| H | 1.219240  | 5.218163  | 0.062256  |

|   |           |           |           |
|---|-----------|-----------|-----------|
| H | 1.948702  | 4.428345  | 1.480513  |
| C | -0.509906 | -1.848466 | -4.054005 |
| N | 0.202502  | -2.557162 | -2.994606 |
| C | -0.015744 | -3.997234 | -3.040850 |
| H | -0.077509 | -2.099859 | -5.028905 |
| H | -0.414705 | -0.771974 | -3.901969 |
| H | -1.586525 | -2.086743 | -4.093570 |
| H | -0.100834 | -2.191105 | -2.093853 |
| H | 0.432537  | -4.414555 | -3.949134 |
| H | -1.081689 | -4.286913 | -3.036446 |
| H | 0.466494  | -4.474630 | -2.183542 |
| C | 2.777848  | 1.062249  | 2.217129  |
| N | 3.595302  | 1.125942  | 0.998588  |
| C | 5.028649  | 1.193206  | 1.290166  |
| H | 2.974428  | 0.126318  | 2.749075  |
| H | 1.723074  | 1.090891  | 1.941563  |
| H | 2.986951  | 1.892950  | 2.907978  |
| H | 3.327355  | 1.974941  | 0.482211  |
| H | 5.357674  | 0.269635  | 1.776703  |
| H | 5.291574  | 2.030735  | 1.954827  |
| H | 5.591512  | 1.307232  | 0.360333  |
| C | 3.246715  | -2.291805 | -0.217675 |
| N | 2.667201  | -0.993714 | -0.642741 |
| C | 2.905132  | -0.652240 | -2.068532 |
| H | 2.923242  | -3.069150 | -0.910546 |
| H | 2.875464  | -2.520393 | 0.783514  |
| H | 4.335993  | -2.227066 | -0.226343 |
| H | 3.039047  | -0.206224 | -0.025113 |
| H | 2.376854  | -1.377370 | -2.690947 |
| H | 3.977312  | -0.663368 | -2.272200 |
| H | 2.497932  | 0.341964  | -2.243274 |
| S | -0.581938 | 0.257304  | -0.284574 |
| O | 0.496014  | 1.209911  | -0.545386 |
| O | -1.744744 | 0.346736  | -1.166107 |
| O | -0.040274 | -1.142930 | -0.242584 |
| O | -1.069051 | 0.574417  | 1.195090  |
| H | 1.629875  | -1.026710 | -0.483791 |
| H | -2.044249 | 0.219640  | 1.354361  |
| C | -3.709523 | -1.593430 | 1.041495  |
| N | -3.531484 | -0.236017 | 1.568169  |
| C | -4.004742 | -0.082218 | 2.944762  |
| H | -3.382643 | -1.612933 | 0.001507  |
| H | -4.753248 | -1.934101 | 1.099152  |
| H | -3.088851 | -2.293624 | 1.607636  |

|         |           |           |           |
|---------|-----------|-----------|-----------|
| H       | -4.016252 | 0.431121  | 0.950709  |
| H       | -3.889066 | 0.957935  | 3.256025  |
| H       | -3.406518 | -0.705952 | 3.615236  |
| H       | -5.059900 | -0.367844 | 3.064909  |
| 1SA8DMA |           |           |           |
| C       | 4.752162  | -1.577720 | -2.986817 |
| N       | 4.535875  | -1.308361 | -1.570578 |
| C       | 5.733513  | -1.544301 | -0.774747 |
| H       | 5.470013  | -0.861497 | -3.402744 |
| H       | 3.811843  | -1.462723 | -3.531742 |
| H       | 5.142208  | -2.590621 | -3.192137 |
| H       | 3.776394  | -1.907324 | -1.226529 |
| H       | 6.512936  | -0.820787 | -1.039718 |
| H       | 6.164516  | -2.553225 | -0.905642 |
| H       | 5.505004  | -1.413978 | 0.286451  |
| C       | -4.511939 | -3.259395 | -1.959497 |
| N       | -4.080572 | -1.948382 | -1.485609 |
| C       | -4.547663 | -0.856809 | -2.335330 |
| H       | -5.601081 | -3.344984 | -1.883339 |
| H       | -4.069022 | -4.040137 | -1.336972 |
| H       | -4.235016 | -3.458976 | -3.008435 |
| H       | -3.062725 | -1.915861 | -1.426442 |
| H       | -5.637312 | -0.768731 | -2.268159 |
| H       | -4.288405 | -0.990606 | -3.399021 |
| H       | -4.106687 | 0.082651  | -1.996354 |
| C       | 2.281489  | -0.771154 | 3.950823  |
| N       | 1.402776  | 0.264520  | 3.422037  |
| C       | 0.390100  | 0.680362  | 4.384823  |
| H       | 2.879006  | -0.370181 | 4.777014  |
| H       | 2.970192  | -1.104598 | 3.170654  |
| H       | 1.743973  | -1.657750 | 4.331493  |
| H       | 0.948048  | -0.082780 | 2.579327  |
| H       | 0.862957  | 1.200273  | 5.225544  |
| H       | -0.194293 | -0.159532 | 4.800972  |
| H       | -0.308297 | 1.369333  | 3.907046  |
| C       | -1.052574 | 3.255909  | -3.213174 |
| N       | -1.557160 | 4.002830  | -2.056941 |
| C       | -2.790836 | 3.418831  | -1.520413 |
| H       | -0.806516 | 2.242506  | -2.891930 |
| H       | -0.146456 | 3.734544  | -3.594349 |
| H       | -1.780499 | 3.188376  | -4.038583 |
| H       | -1.737938 | 4.962752  | -2.334906 |
| H       | -2.564930 | 2.421118  | -1.139665 |
| H       | -3.592880 | 3.333453  | -2.272273 |

|   |           |           |           |
|---|-----------|-----------|-----------|
| H | -3.158695 | 4.032002  | -0.693821 |
| C | 1.443698  | -3.751387 | -1.614387 |
| N | 2.158050  | -3.084252 | -0.528284 |
| C | 2.485890  | -3.995877 | 0.562767  |
| H | 2.105905  | -4.470166 | -2.109511 |
| H | 1.126502  | -3.011888 | -2.351658 |
| H | 0.545467  | -4.291722 | -1.275390 |
| H | 1.577992  | -2.327791 | -0.166997 |
| H | 3.214861  | -4.739979 | 0.223948  |
| H | 1.611368  | -4.541876 | 0.956282  |
| H | 2.935429  | -3.438029 | 1.387819  |
| C | -0.355664 | 3.560595  | 1.522310  |
| N | 0.443958  | 3.872952  | 0.330578  |
| C | 1.073959  | 5.192140  | 0.412582  |
| H | 0.296649  | 3.482877  | 2.397415  |
| H | -0.856732 | 2.601767  | 1.382517  |
| H | -1.113467 | 4.330700  | 1.733901  |
| H | -0.180037 | 3.862850  | -0.487061 |
| H | 1.802300  | 5.211402  | 1.229301  |
| H | 0.350340  | 6.002215  | 0.593929  |
| H | 1.601673  | 5.409986  | -0.519335 |
| C | 3.295457  | 1.733993  | 0.920942  |
| N | 2.183581  | 1.652368  | -0.059434 |
| C | 2.621204  | 1.602570  | -1.478282 |
| H | 4.005019  | 0.932192  | 0.716863  |
| H | 2.876460  | 1.611963  | 1.922102  |
| H | 3.797797  | 2.697735  | 0.822423  |
| H | 1.528767  | 2.481517  | 0.076858  |
| H | 3.291895  | 0.749246  | -1.611487 |
| H | 3.134869  | 2.532525  | -1.730037 |
| H | 1.730829  | 1.488125  | -2.094358 |
| S | -0.680147 | -0.383621 | -0.033234 |
| O | -0.696411 | 0.742678  | -0.969923 |
| O | -1.234399 | -1.635374 | -0.552928 |
| O | 0.694061  | -0.570792 | 0.529835  |
| O | -1.564549 | 0.040606  | 1.217032  |
| H | 1.618277  | 0.792356  | 0.145670  |
| H | -2.441286 | -0.555815 | 1.306770  |
| C | -3.259182 | -2.679563 | 2.098419  |
| N | -3.685517 | -1.413653 | 1.491287  |
| C | -4.745532 | -0.736865 | 2.242131  |
| H | -2.496623 | -3.130729 | 1.462954  |
| H | -4.090719 | -3.386424 | 2.226206  |
| H | -2.818290 | -2.486422 | 3.080316  |

|   |           |           |          |
|---|-----------|-----------|----------|
| H | -3.998850 | -1.596032 | 0.526436 |
| H | -5.045041 | 0.168950  | 1.711353 |
| H | -4.373358 | -0.445980 | 3.228484 |
| H | -5.633013 | -1.369431 | 2.383873 |

#### 2DMA

|   |           |           |           |
|---|-----------|-----------|-----------|
| C | -2.148635 | 1.164459  | 0.020895  |
| N | -1.668550 | -0.117380 | 0.530752  |
| C | -1.851764 | -1.210418 | -0.422970 |
| H | -1.539164 | 1.461000  | -0.837539 |
| H | -2.039666 | 1.932364  | 0.790300  |
| H | -3.201940 | 1.146017  | -0.306710 |
| H | -2.148591 | -0.337072 | 1.396853  |
| H | -1.175089 | -1.060198 | -1.268232 |
| H | -2.881221 | -1.292940 | -0.809957 |
| H | -1.585050 | -2.157902 | 0.051003  |
| C | 2.243450  | -1.112792 | 0.231257  |
| N | 1.399318  | -0.023976 | -0.235913 |
| C | 2.056130  | 1.271438  | -0.154517 |
| H | 3.104824  | -1.230114 | -0.435717 |
| H | 1.682688  | -2.050844 | 0.211186  |
| H | 2.638460  | -0.972121 | 1.255078  |
| H | 0.525660  | -0.008816 | 0.289620  |
| H | 2.904100  | 1.304683  | -0.847783 |
| H | 2.445257  | 1.519684  | 0.850999  |
| H | 1.359268  | 2.059630  | -0.450961 |

#### 2SA

|   |           |           |           |
|---|-----------|-----------|-----------|
| S | 1.769793  | 0.023050  | -0.081256 |
| O | 1.273918  | 1.278519  | -0.568001 |
| O | 1.280545  | -1.197772 | -0.679657 |
| O | 3.343903  | 0.077463  | -0.194602 |
| O | 1.628745  | -0.061620 | 1.486392  |
| H | 3.707601  | -0.819103 | -0.119457 |
| H | 0.655946  | -0.094496 | 1.674825  |
| S | -1.947474 | -0.013423 | 0.104614  |
| O | -1.049244 | -0.086017 | 1.243375  |
| O | -3.352225 | -0.038109 | 0.272861  |
| O | -1.594459 | 1.299804  | -0.715394 |
| O | -1.567797 | -1.191539 | -0.890023 |
| H | -0.628022 | 1.464940  | -0.696936 |
| H | -0.599718 | -1.351201 | -0.871779 |

#### 2SA1DMA

|   |           |          |           |
|---|-----------|----------|-----------|
| S | -2.277531 | 0.022843 | 0.005944  |
| O | -1.376427 | 1.092759 | -0.408666 |
| O | -3.665923 | 0.291648 | 0.130548  |



|         |           |           |           |
|---------|-----------|-----------|-----------|
| O       | -2.107588 | -1.179725 | -0.995579 |
| O       | -1.757477 | -0.544133 | 1.381528  |
| H       | -1.152647 | -1.463491 | -1.050198 |
| H       | -0.760531 | -0.655452 | 1.352915  |
| S       | 1.450802  | -1.261293 | -0.092366 |
| O       | 2.276391  | -0.270205 | -0.775200 |
| O       | 0.462035  | -1.952409 | -0.921982 |
| O       | 2.526700  | -2.380001 | 0.350567  |
| O       | 0.856408  | -0.721198 | 1.150520  |
| H       | 2.041275  | -3.176252 | 0.609749  |
| H       | 0.169204  | 1.763061  | -0.046412 |
| C       | 1.238878  | 3.185203  | -1.100836 |
| N       | 1.144769  | 2.123103  | -0.065920 |
| C       | 1.554792  | 2.534023  | 1.303449  |
| H       | 0.912107  | 2.768572  | -2.052033 |
| H       | 2.271478  | 3.523908  | -1.179296 |
| H       | 0.592316  | 4.017561  | -0.824908 |
| H       | 1.707830  | 1.289637  | -0.357209 |
| H       | 1.464830  | 1.664302  | 1.951197  |
| H       | 0.904285  | 3.336441  | 1.650396  |
| H       | 2.589141  | 2.875950  | 1.280430  |
| 2SA2DMA |           |           |           |
| S       | 1.311844  | -1.750213 | -0.533975 |
| O       | 1.179412  | -1.046971 | 0.779173  |
| O       | 2.576625  | -2.393360 | -0.745511 |
| O       | 0.101629  | -2.556645 | -0.777637 |
| O       | 1.277045  | -0.546960 | -1.632662 |
| H       | -1.137313 | -1.942420 | 0.099440  |
| H       | 0.365440  | -0.174590 | -1.668408 |
| C       | -3.218497 | -1.832304 | 0.091441  |
| N       | -1.904751 | -1.597669 | 0.739380  |
| C       | -1.720550 | -2.250593 | 2.059039  |
| H       | -3.220888 | -1.301534 | -0.858850 |
| H       | -4.015517 | -1.451377 | 0.730032  |
| H       | -3.351716 | -2.900534 | -0.078318 |
| H       | -1.767563 | -0.571570 | 0.841394  |
| H       | -0.709424 | -2.030051 | 2.395811  |
| H       | -1.840640 | -3.327760 | 1.945671  |
| H       | -2.454149 | -1.864180 | 2.766969  |
| S       | -1.323787 | 1.697252  | -0.399284 |
| O       | -0.167893 | 2.602311  | -0.390794 |
| O       | -1.708125 | 1.193010  | 0.918666  |
| O       | -2.600310 | 2.614348  | -0.815646 |
| O       | -1.225477 | 0.641388  | -1.415858 |

|   |           |          |           |
|---|-----------|----------|-----------|
| H | -2.399888 | 3.020094 | -1.670938 |
| H | 1.773189  | 0.448200 | 0.781010  |
| C | 2.145427  | 2.029665 | 2.093848  |
| N | 2.089819  | 1.461249 | 0.725202  |
| C | 3.362541  | 1.522243 | -0.038659 |
| H | 1.151616  | 1.956666 | 2.533102  |
| H | 2.446525  | 3.076185 | 2.045245  |
| H | 2.859352  | 1.464038 | 2.692301  |
| H | 1.329079  | 1.943282 | 0.202113  |
| H | 3.189427  | 1.070094 | -1.013256 |
| H | 4.126547  | 0.955658 | 0.493156  |
| H | 3.674767  | 2.561080 | -0.148257 |

#### 2SA3DMA

|   |           |           |           |
|---|-----------|-----------|-----------|
| C | -0.536177 | 3.600811  | -0.307406 |
| N | 0.141914  | 2.480478  | -0.998523 |
| C | 0.943412  | 2.872868  | -2.182679 |
| H | 0.216020  | 4.282676  | 0.089986  |
| H | -1.131664 | 3.186408  | 0.504262  |
| H | -1.184035 | 4.134360  | -1.005104 |
| H | -0.567232 | 1.777432  | -1.261219 |
| H | 1.700935  | 3.592596  | -1.871648 |
| H | 0.298300  | 3.319315  | -2.941582 |
| H | 1.433721  | 1.976350  | -2.556534 |
| S | 2.297443  | 0.013589  | 0.061598  |
| O | 1.699166  | -1.167931 | 0.805359  |
| O | 3.742438  | 0.022148  | 0.110286  |
| O | 1.766120  | -0.059119 | -1.360773 |
| O | 1.691093  | 1.263314  | 0.680094  |
| H | 0.865427  | -1.248239 | -1.541361 |
| H | 0.801209  | 1.967051  | -0.292510 |
| C | -0.460355 | -2.049049 | -2.978714 |
| N | 0.201583  | -2.106757 | -1.655218 |
| C | 0.985831  | -3.338443 | -1.399660 |
| H | -1.049879 | -1.134718 | -3.022780 |
| H | -1.115109 | -2.912409 | -3.107453 |
| H | 0.300650  | -2.043872 | -3.759488 |
| H | -0.515606 | -1.978743 | -0.923993 |
| H | 1.457551  | -3.228185 | -0.425257 |
| H | 1.756814  | -3.431149 | -2.164937 |
| H | 0.331913  | -4.211948 | -1.425883 |
| S | -2.354571 | -0.014355 | -0.049304 |
| O | -2.042233 | 0.865475  | 1.085088  |
| O | -1.907794 | -1.393285 | 0.127349  |
| O | -3.977956 | -0.182199 | -0.068178 |

O -1.993552 0.583145 -1.342330  
H -4.359923 0.695537 -0.205645  
H 0.730677 -0.714555 1.868439  
C -0.638592 -1.553488 3.240597  
N 0.039887 -0.379902 2.642889  
C 0.797504 0.457294 3.604310  
H -1.199643 -2.056242 2.455060  
H -1.320317 -1.229201 4.028496  
H 0.112294 -2.225545 3.656666  
H -0.663656 0.191073 2.148258  
H 1.292218 1.241861 3.035354  
H 1.550569 -0.161852 4.092159  
H 0.121125 0.875184 4.352118

2SA4DMA

C 5.610510 1.025543 -0.640313  
N 4.703507 -0.059481 -0.253600  
C 5.387449 -1.323688 0.032998  
H 6.272164 1.260604 0.196901  
H 5.026788 1.917671 -0.872465  
H 6.232732 0.771649 -1.509851  
H 4.002251 -0.197564 -0.977751  
H 6.041139 -1.193501 0.898786  
H 5.998620 -1.678948 -0.808583  
H 4.648580 -2.087950 0.280007  
C 0.071654 2.870126 -2.014611  
N -0.949130 2.437221 -1.034768  
C -2.023360 3.423691 -0.773650  
H -0.397633 3.000545 -2.990292  
H 0.837990 2.098181 -2.065325  
H 0.522402 3.810779 -1.693507  
H -0.465995 2.183422 -0.154850  
H -2.524634 3.657685 -1.713329  
H -1.600818 4.333561 -0.343395  
H -2.734128 2.958624 -0.093459  
S -2.947489 -0.352649 -0.750810  
O -2.276996 -1.623373 -0.249532  
O -4.283696 -0.598513 -1.246130  
O -2.927164 0.630776 0.403477  
O -2.030106 0.217154 -1.821669  
H -2.202682 0.051834 1.618000  
H -1.410524 1.508562 -1.374887  
C -1.536930 0.670281 3.520488  
N -1.693269 -0.369595 2.477388  
C -2.440276 -1.575214 2.908681

|         |           |           |           |
|---------|-----------|-----------|-----------|
| H       | -0.924392 | 1.470540  | 3.109433  |
| H       | -1.043409 | 0.246305  | 4.396423  |
| H       | -2.520554 | 1.049809  | 3.798708  |
| H       | -0.751853 | -0.634962 | 2.134014  |
| H       | -2.541251 | -2.224489 | 2.041410  |
| H       | -3.431394 | -1.273790 | 3.248826  |
| H       | -1.907034 | -2.074990 | 3.719331  |
| S       | 1.459554  | 0.388245  | 0.861652  |
| O       | 1.690492  | 0.150015  | -0.587351 |
| O       | 0.944067  | -0.818577 | 1.532294  |
| O       | 2.873927  | 0.716732  | 1.487495  |
| O       | 0.627900  | 1.569210  | 1.128570  |
| H       | 3.627273  | 0.391640  | 0.864003  |
| H       | -0.964586 | -1.838940 | -0.907195 |
| C       | 0.642743  | -3.200555 | -0.774254 |
| N       | -0.004033 | -2.027216 | -1.403226 |
| C       | -0.260275 | -2.165943 | -2.856187 |
| H       | 0.846717  | -2.954855 | 0.266301  |
| H       | 1.576860  | -3.434676 | -1.288890 |
| H       | -0.031626 | -4.055201 | -0.835287 |
| H       | 0.574694  | -1.190346 | -1.216583 |
| H       | -0.796875 | -1.276664 | -3.180195 |
| H       | -0.889550 | -3.041041 | -3.020400 |
| H       | 0.681676  | -2.282370 | -3.396084 |
| 2SA5DMA |           |           |           |
| C       | -0.054955 | 3.979384  | 0.292350  |
| N       | -0.212877 | 2.899931  | -0.706473 |
| C       | -0.513188 | 3.355853  | -2.081759 |
| H       | 0.812453  | 4.589749  | 0.036703  |
| H       | 0.077407  | 3.513843  | 1.267315  |
| H       | -0.949549 | 4.604585  | 0.307361  |
| H       | -0.950315 | 2.236645  | -0.371464 |
| H       | 0.275950  | 4.029618  | -2.418017 |
| H       | -1.473123 | 3.875188  | -2.104608 |
| H       | -0.530218 | 2.474559  | -2.720382 |
| S       | 1.418733  | -0.008127 | -1.471104 |
| O       | 0.146444  | 0.164667  | -2.212612 |
| O       | 2.491010  | -0.632730 | -2.247905 |
| O       | 1.872432  | 1.334159  | -0.932154 |
| O       | 1.140409  | -0.880122 | -0.233266 |
| H       | 0.676450  | 2.288293  | -0.753045 |
| H       | -0.162089 | -0.926618 | 0.587581  |
| C       | 5.931930  | -1.029180 | -0.273223 |
| N       | 4.507285  | -1.316643 | -0.099195 |

|   |           |           |           |
|---|-----------|-----------|-----------|
| C | 4.221736  | -2.754395 | -0.029809 |
| H | 6.076785  | 0.045779  | -0.401027 |
| H | 6.367360  | -1.540369 | -1.145051 |
| H | 6.489994  | -1.346842 | 0.613524  |
| H | 3.983810  | -0.950954 | -0.902311 |
| H | 3.139858  | -2.893679 | -0.020658 |
| H | 4.648462  | -3.181098 | 0.884304  |
| H | 4.633014  | -3.307496 | -0.886777 |
| C | -4.466678 | -2.405448 | 1.175743  |
| N | -4.832776 | -1.547468 | 0.032779  |
| C | -5.366271 | -0.245822 | 0.476748  |
| H | -3.677532 | -1.915967 | 1.747090  |
| H | -4.096076 | -3.365835 | 0.809642  |
| H | -5.316977 | -2.590787 | 1.847207  |
| H | -5.549535 | -2.022652 | -0.509551 |
| H | -4.586827 | 0.285867  | 1.022943  |
| H | -6.241196 | -0.355752 | 1.133057  |
| H | -5.656487 | 0.347113  | -0.394158 |
| C | -2.835077 | -0.405355 | -2.832797 |
| N | -2.484434 | -1.058318 | -1.547518 |
| C | -1.713771 | -2.318955 | -1.716397 |
| H | -1.911123 | -0.182189 | -3.362120 |
| H | -3.373680 | 0.516911  | -2.617143 |
| H | -3.467765 | -1.073698 | -3.418457 |
| H | -3.362485 | -1.247446 | -0.982323 |
| H | -0.792302 | -2.086851 | -2.244305 |
| H | -2.321700 | -3.031928 | -2.275927 |
| H | -1.482264 | -2.709531 | -0.728451 |
| S | -1.497140 | 0.465277  | 1.587719  |
| O | -2.576001 | 0.232124  | 2.523409  |
| O | -0.991317 | -1.009240 | 1.175079  |
| O | -1.980206 | 1.055497  | 0.291198  |
| O | -0.327707 | 1.191188  | 2.090039  |
| H | -1.942008 | -0.379565 | -0.985421 |
| H | 1.994026  | -0.117342 | 1.020162  |
| C | 3.047632  | 1.416339  | 1.987033  |
| N | 2.762881  | -0.013983 | 1.729697  |
| C | 2.382001  | -0.784728 | 2.936593  |
| H | 3.256000  | 1.888600  | 1.029685  |
| H | 3.902360  | 1.503709  | 2.660702  |
| H | 2.163712  | 1.868426  | 2.434327  |
| H | 3.567488  | -0.473031 | 1.207704  |
| H | 2.175075  | -1.812664 | 2.642282  |
| H | 1.480159  | -0.343252 | 3.359020  |

|         |           |           |           |
|---------|-----------|-----------|-----------|
| H       | 3.196193  | -0.762883 | 3.662525  |
| 2SA6DMA |           |           |           |
| C       | -4.808973 | 0.856824  | -0.594507 |
| N       | -4.795878 | -0.600112 | -0.575992 |
| C       | -6.133951 | -1.178412 | -0.585918 |
| H       | -5.212653 | 1.216583  | -1.547965 |
| H       | -3.785125 | 1.222277  | -0.494782 |
| H       | -5.416971 | 1.304290  | 0.212130  |
| H       | -4.298235 | -0.915624 | 0.254951  |
| H       | -6.629717 | -0.962600 | -1.539030 |
| H       | -6.786588 | -0.799638 | 0.220216  |
| H       | -6.065180 | -2.263741 | -0.481490 |
| C       | -0.153544 | -2.911369 | -2.706555 |
| N       | -1.139975 | -2.003728 | -2.065890 |
| C       | -2.502328 | -2.053920 | -2.656524 |
| H       | -0.438919 | -3.947705 | -2.523222 |
| H       | 0.830212  | -2.694609 | -2.292157 |
| H       | -0.135627 | -2.716213 | -3.779030 |
| H       | -0.734989 | -1.027291 | -2.113254 |
| H       | -2.844109 | -3.090094 | -2.672771 |
| H       | -2.462869 | -1.668240 | -3.676101 |
| H       | -3.190215 | -1.460954 | -2.045461 |
| S       | -1.683580 | -1.441494 | 1.566711  |
| O       | -3.094410 | -1.531577 | 1.867617  |
| O       | -0.793598 | -1.303258 | 2.731384  |
| O       | -1.171433 | -2.477049 | 0.634020  |
| O       | -1.556507 | -0.046410 | 0.729739  |
| H       | -1.201168 | -2.218951 | -1.042254 |
| H       | -0.594488 | 0.072489  | 0.449159  |
| C       | 2.047882  | -2.995209 | 1.287512  |
| N       | 1.803841  | -1.647460 | 1.859956  |
| C       | 2.908001  | -1.140662 | 2.714522  |
| H       | 1.153261  | -3.291100 | 0.744551  |
| H       | 2.237610  | -3.700350 | 2.097920  |
| H       | 2.907771  | -2.942842 | 0.622819  |
| H       | 0.890743  | -1.640428 | 2.366736  |
| H       | 2.618416  | -0.168481 | 3.112063  |
| H       | 3.800188  | -1.042304 | 2.090902  |
| H       | 3.076840  | -1.835470 | 3.538199  |
| C       | 0.066986  | 2.594506  | 2.525975  |
| N       | -0.981107 | 2.850282  | 1.525118  |
| C       | -2.037039 | 3.735083  | 2.031970  |
| H       | 0.558484  | 3.535367  | 2.793327  |
| H       | 0.803365  | 1.917629  | 2.091159  |

|         |           |           |           |
|---------|-----------|-----------|-----------|
| H       | -0.331594 | 2.141025  | 3.442979  |
| H       | -1.400046 | 1.947799  | 1.295930  |
| H       | -1.627903 | 4.731761  | 2.223620  |
| H       | -2.484764 | 3.368562  | 2.966252  |
| H       | -2.830324 | 3.827672  | 1.286925  |
| C       | 1.085292  | 4.846414  | -0.660560 |
| N       | 0.393784  | 3.557829  | -0.886442 |
| C       | -0.541738 | 3.562514  | -2.039704 |
| H       | 1.672961  | 5.103319  | -1.542239 |
| H       | 1.752111  | 4.744500  | 0.195046  |
| H       | 0.356114  | 5.634066  | -0.464319 |
| H       | -0.137489 | 3.286480  | -0.003227 |
| H       | -0.002103 | 3.869420  | -2.935905 |
| H       | -1.364930 | 4.252416  | -1.847100 |
| H       | -0.903980 | 2.545546  | -2.179874 |
| S       | 1.409657  | 0.343888  | -1.288558 |
| O       | 0.166859  | 0.347374  | -2.124646 |
| O       | 2.259873  | -0.823946 | -1.566979 |
| O       | 2.130750  | 1.636784  | -1.471317 |
| O       | 0.960351  | 0.280376  | 0.177311  |
| H       | 1.124258  | 2.793917  | -1.071127 |
| H       | 1.630379  | -0.953470 | 1.084973  |
| C       | 5.435673  | 0.597899  | -0.069537 |
| N       | 4.924664  | -0.770350 | -0.047263 |
| C       | 5.928458  | -1.746471 | -0.453373 |
| H       | 4.610235  | 1.294404  | 0.085709  |
| H       | 5.923232  | 0.865162  | -1.022673 |
| H       | 6.171076  | 0.739440  | 0.730816  |
| H       | 4.120156  | -0.823457 | -0.672282 |
| H       | 5.482103  | -2.743603 | -0.499685 |
| H       | 6.739626  | -1.779953 | 0.282355  |
| H       | 6.382928  | -1.532074 | -1.436477 |
| 2SA7DMA |           |           |           |
| C       | -0.577810 | 3.698276  | 2.611253  |
| N       | -0.273809 | 3.816196  | 1.190306  |
| C       | -0.854873 | 5.006081  | 0.585217  |
| H       | -0.094833 | 4.510815  | 3.165227  |
| H       | -0.189646 | 2.751688  | 2.991538  |
| H       | -1.657608 | 3.736782  | 2.837398  |
| H       | -0.611106 | 2.992745  | 0.695055  |
| H       | -0.394816 | 5.906377  | 1.006900  |
| H       | -1.946544 | 5.096843  | 0.738714  |
| H       | -0.662752 | 5.004047  | -0.490488 |
| C       | -1.926958 | -3.559616 | -2.801326 |

|   |           |           |           |
|---|-----------|-----------|-----------|
| N | -2.905004 | -3.122245 | -1.807569 |
| C | -4.278812 | -3.381216 | -2.223763 |
| H | -1.923169 | -4.653133 | -2.866955 |
| H | -0.929278 | -3.232571 | -2.503109 |
| H | -2.126016 | -3.167280 | -3.813459 |
| H | -2.783028 | -2.124979 | -1.656117 |
| H | -4.459595 | -4.460748 | -2.264017 |
| H | -4.525675 | -2.966756 | -3.216871 |
| H | -4.972363 | -2.951761 | -1.496618 |
| C | -5.199409 | 3.162253  | -1.843268 |
| N | -4.329771 | 2.624484  | -0.793779 |
| C | -4.930377 | 2.655729  | 0.545549  |
| H | -6.088232 | 2.532775  | -1.933765 |
| H | -4.671697 | 3.143119  | -2.798491 |
| H | -5.529210 | 4.191650  | -1.641537 |
| H | -3.452541 | 3.138699  | -0.781375 |
| H | -5.820941 | 2.021956  | 0.552228  |
| H | -5.226565 | 3.667248  | 0.857669  |
| H | -4.217119 | 2.247561  | 1.262567  |
| S | -1.772016 | 0.417527  | -0.341577 |
| O | -1.132720 | 1.643295  | -0.828155 |
| O | -2.107514 | 0.456463  | 1.081723  |
| O | -3.143485 | 0.243362  | -1.155892 |
| O | -1.044400 | -0.822186 | -0.720960 |
| H | -3.671431 | 1.110358  | -1.064719 |
| H | -1.182562 | -2.185463 | 0.450957  |
| C | -2.637286 | -2.727011 | 1.802960  |
| N | -1.257419 | -2.826023 | 1.264184  |
| C | -0.874765 | -4.201925 | 0.852280  |
| H | -2.841545 | -1.682015 | 2.028251  |
| H | -2.716236 | -3.339295 | 2.702465  |
| H | -3.330264 | -3.084510 | 1.042145  |
| H | -0.560299 | -2.430509 | 1.977957  |
| H | 0.145385  | -4.167827 | 0.476702  |
| H | -1.565708 | -4.526587 | 0.074938  |
| H | -0.936518 | -4.861796 | 1.719186  |
| C | 6.274225  | 0.595582  | -0.289128 |
| N | 5.633273  | 1.294416  | -1.417013 |
| C | 5.579976  | 0.452182  | -2.625602 |
| H | 5.660869  | -0.266067 | -0.022164 |
| H | 6.337672  | 1.267730  | 0.570433  |
| H | 7.287511  | 0.244869  | -0.532355 |
| H | 6.168389  | 2.132432  | -1.627894 |
| H | 4.955868  | -0.417462 | -2.416280 |



|         |           |           |           |
|---------|-----------|-----------|-----------|
| H       | 6.575018  | 0.104260  | -2.938532 |
| H       | 5.136324  | 1.018870  | -3.447828 |
| C       | 2.072348  | 2.080824  | -1.777281 |
| N       | 2.939837  | 1.903151  | -0.579990 |
| C       | 2.961501  | 3.077473  | 0.330453  |
| H       | 1.035661  | 2.190752  | -1.461797 |
| H       | 2.156169  | 1.187031  | -2.392267 |
| H       | 2.403215  | 2.960760  | -2.331788 |
| H       | 3.925808  | 1.687234  | -0.893970 |
| H       | 1.942528  | 3.329670  | 0.640052  |
| H       | 3.410915  | 3.925478  | -0.190100 |
| H       | 3.565147  | 2.827342  | 1.203326  |
| S       | 2.402436  | -1.517598 | -0.188760 |
| O       | 3.761445  | -1.573347 | -0.695063 |
| O       | 1.860664  | -2.745904 | 0.375832  |
| O       | 2.172535  | -0.356463 | 0.728696  |
| O       | 1.531162  | -1.159428 | -1.514510 |
| H       | 2.611509  | 1.053630  | -0.045957 |
| H       | 0.593745  | -0.993515 | -1.247741 |
| C       | -0.088679 | -0.570594 | 3.867571  |
| N       | 0.552124  | -1.586049 | 3.027191  |
| C       | 1.475963  | -2.451654 | 3.764975  |
| H       | -0.718140 | 0.065045  | 3.242319  |
| H       | 0.640017  | 0.059077  | 4.401081  |
| H       | -0.721014 | -1.054525 | 4.619208  |
| H       | 1.079521  | -1.118476 | 2.285929  |
| H       | 1.988492  | -3.102451 | 3.055980  |
| H       | 0.922013  | -3.068249 | 4.480595  |
| H       | 2.231581  | -1.881872 | 4.326745  |
| 2SA8DMA |           |           |           |
| C       | 5.762834  | 1.667047  | -2.665763 |
| N       | 4.884876  | 1.035527  | -1.690648 |
| C       | 5.617963  | 0.348963  | -0.633035 |
| H       | 6.323417  | 2.483298  | -2.196139 |
| H       | 5.168614  | 2.096937  | -3.476431 |
| H       | 6.501411  | 0.977564  | -3.113686 |
| H       | 4.271940  | 0.361338  | -2.158728 |
| H       | 6.155448  | 1.076166  | -0.012917 |
| H       | 6.363988  | -0.373816 | -1.010282 |
| H       | 4.913307  | -0.188874 | 0.004908  |
| C       | 0.052519  | 4.978375  | 2.139198  |
| N       | -0.525046 | 4.145698  | 1.082239  |
| C       | -1.337762 | 4.921500  | 0.137481  |
| H       | 0.764690  | 5.692527  | 1.712552  |

|   |           |           |           |
|---|-----------|-----------|-----------|
| H | 0.587433  | 4.349266  | 2.854326  |
| H | -0.706388 | 5.555980  | 2.689665  |
| H | -1.133376 | 3.437813  | 1.523249  |
| H | -0.705649 | 5.631263  | -0.407041 |
| H | -2.129219 | 5.499400  | 0.639253  |
| H | -1.795042 | 4.238791  | -0.579117 |
| C | 2.032782  | -0.940756 | -3.927907 |
| N | 2.887572  | -1.146206 | -2.762182 |
| C | 3.512379  | -2.464437 | -2.746204 |
| H | 2.643291  | -0.905955 | -4.836473 |
| H | 1.504021  | 0.010004  | -3.837344 |
| H | 1.276016  | -1.731837 | -4.062232 |
| H | 2.335148  | -1.026242 | -1.916294 |
| H | 4.235423  | -2.545370 | -3.564986 |
| H | 2.790388  | -3.292298 | -2.857283 |
| H | 4.043934  | -2.602784 | -1.803306 |
| C | 3.563090  | -4.364682 | 2.988686  |
| N | 2.865562  | -3.076946 | 2.970308  |
| C | 3.278139  | -2.166518 | 4.046079  |
| H | 4.628288  | -4.202554 | 2.805211  |
| H | 3.175312  | -5.001610 | 2.191365  |
| H | 3.459677  | -4.895366 | 3.946502  |
| H | 1.861851  | -3.230479 | 3.028373  |
| H | 4.334874  | -1.917894 | 3.918410  |
| H | 3.146605  | -2.601845 | 5.047137  |
| H | 2.698778  | -1.245843 | 3.970017  |
| S | 1.206590  | -0.959482 | 0.925980  |
| O | 0.257592  | -2.037198 | 1.217369  |
| O | 1.362285  | 0.016346  | 1.999245  |
| O | 2.635511  | -1.658011 | 0.690951  |
| O | 0.968611  | -0.305475 | -0.393093 |
| H | 2.825577  | -2.226708 | 1.512904  |
| H | 1.078465  | 1.529411  | -0.278555 |
| C | 2.646309  | 2.687576  | 0.400398  |
| N | 1.344304  | 2.529977  | -0.305257 |
| C | 1.381415  | 2.968991  | -1.725329 |
| H | 2.562742  | 2.204210  | 1.372130  |
| H | 2.853745  | 3.752251  | 0.518838  |
| H | 3.431057  | 2.215018  | -0.195780 |
| H | 0.596298  | 3.089981  | 0.215838  |
| H | 0.404292  | 2.774483  | -2.162526 |
| H | 2.161199  | 2.412894  | -2.244484 |
| H | 1.608611  | 4.035292  | -1.761264 |
| C | -6.088334 | -1.029778 | -0.621310 |

|      |           |           |           |
|------|-----------|-----------|-----------|
| N    | -5.533531 | -2.323749 | -1.059888 |
| C    | -5.333691 | -2.363653 | -2.520228 |
| H    | -5.369261 | -0.244050 | -0.855741 |
| H    | -6.253232 | -1.048305 | 0.458675  |
| H    | -7.040000 | -0.791993 | -1.117150 |
| H    | -6.180655 | -3.062767 | -0.798972 |
| H    | -4.620990 | -1.585022 | -2.797828 |
| H    | -6.265978 | -2.191225 | -3.076479 |
| H    | -4.932001 | -3.337732 | -2.809990 |
| C    | -2.030057 | -3.325413 | -0.648833 |
| N    | -2.933844 | -2.464246 | 0.159684  |
| C    | -2.943704 | -2.797754 | 1.605499  |
| H    | -1.025704 | -3.252844 | -0.235636 |
| H    | -2.029963 | -2.954774 | -1.671710 |
| H    | -2.390760 | -4.355272 | -0.613576 |
| H    | -3.912244 | -2.502028 | -0.240884 |
| H    | -1.934410 | -2.668312 | 1.993384  |
| H    | -3.279243 | -3.826955 | 1.743759  |
| H    | -3.624537 | -2.117000 | 2.115979  |
| S    | -2.299543 | 0.663658  | -1.403639 |
| O    | -3.430580 | 0.525030  | -2.299395 |
| O    | -1.612014 | 1.948641  | -1.400640 |
| O    | -2.602444 | 0.200544  | -0.012704 |
| O    | -1.240775 | -0.446718 | -1.956315 |
| H    | -2.661914 | -1.447828 | 0.064053  |
| H    | -0.440319 | -0.428217 | -1.375652 |
| C    | -1.671192 | 1.304539  | 3.466682  |
| N    | -2.312176 | 2.036558  | 2.376749  |
| C    | -3.663108 | 2.476750  | 2.705978  |
| H    | -0.707274 | 0.916913  | 3.132785  |
| H    | -2.277827 | 0.457533  | 3.834269  |
| H    | -1.500819 | 1.974657  | 4.316780  |
| H    | -2.353017 | 1.439336  | 1.550218  |
| H    | -4.123653 | 2.938064  | 1.829598  |
| H    | -3.632045 | 3.223918  | 3.506437  |
| H    | -4.320082 | 1.656607  | 3.045687  |
| 3DMA |           |           |           |
| C    | -2.285316 | -1.304237 | 1.213117  |
| N    | -1.617702 | -0.848072 | -0.000352 |
| C    | -2.285520 | -1.304540 | -1.213584 |
| H    | -3.275095 | -0.842324 | 1.291667  |
| H    | -1.706398 | -1.001671 | 2.089042  |
| H    | -2.425740 | -2.398489 | 1.256778  |
| H    | -0.644254 | -1.162645 | -0.000423 |

|     |           |           |           |
|-----|-----------|-----------|-----------|
| H   | -3.275673 | -0.843336 | -1.291629 |
| H   | -2.425205 | -2.398887 | -1.257341 |
| H   | -1.707236 | -1.001428 | -2.089742 |
| C   | 0.011235  | 2.629890  | 1.213431  |
| N   | 0.073220  | 1.823669  | 0.000179  |
| C   | 0.012760  | 2.629046  | -1.213694 |
| H   | 0.906109  | 3.256133  | 1.292933  |
| H   | -0.016965 | 1.977147  | 2.089258  |
| H   | -0.866249 | 3.298638  | 1.256713  |
| H   | -0.685474 | 1.137364  | -0.000003 |
| H   | 0.907272  | 3.255967  | -1.291887 |
| H   | -0.865173 | 3.297066  | -1.259027 |
| H   | -0.013223 | 1.975760  | -2.089187 |
| C   | 2.273025  | -1.324911 | 1.213748  |
| N   | 1.543907  | -0.976706 | 0.000070  |
| C   | 2.274377  | -1.324408 | -1.212935 |
| H   | 2.370820  | -2.412820 | 1.292659  |
| H   | 1.720175  | -0.976161 | 2.089331  |
| H   | 3.289831  | -0.896820 | 1.257782  |
| H   | 1.327125  | 0.023129  | 0.000146  |
| H   | 2.372408  | -2.412276 | -1.292138 |
| H   | 3.291176  | -0.896168 | -1.255718 |
| H   | 1.722429  | -0.975445 | -2.089002 |
| 3SA |           |           |           |
| S   | 2.453303  | -0.912397 | -0.075672 |
| O   | 1.701196  | -0.150044 | -1.066277 |
| O   | 3.861532  | -1.036833 | -0.154936 |
| O   | 2.077523  | -0.323128 | 1.349795  |
| O   | 1.860678  | -2.370800 | -0.045667 |
| H   | 1.289198  | 0.262576  | 1.283646  |
| H   | 0.879461  | -2.355932 | -0.099787 |
| S   | -1.976018 | -1.376488 | -0.074586 |
| O   | -0.916118 | -2.350134 | 0.009575  |
| O   | -2.002218 | -0.452780 | -1.175022 |
| O   | -3.356678 | -2.142931 | -0.083850 |
| O   | -2.111869 | -0.601128 | 1.283631  |
| H   | -3.260607 | -2.996996 | 0.366376  |
| H   | -1.449726 | 0.146467  | 1.299004  |
| S   | -0.276830 | 2.406685  | 0.085967  |
| O   | -0.202668 | 1.208464  | 0.952168  |
| O   | -0.350936 | 3.691197  | 0.672745  |
| O   | 0.949162  | 2.347724  | -0.873951 |
| O   | -1.541048 | 2.226462  | -0.833039 |
| H   | 1.270198  | 1.407820  | -1.018765 |

|         |           |           |           |
|---------|-----------|-----------|-----------|
| H       | -1.684280 | 1.282701  | -1.083178 |
| 3SA1DMA |           |           |           |
| S       | 2.762920  | -0.873362 | -0.489535 |
| O       | 4.045736  | -1.423948 | -0.740599 |
| O       | 2.476927  | -0.232042 | 0.787222  |
| O       | 2.458681  | 0.158452  | -1.641743 |
| O       | 1.699903  | -2.020041 | -0.704365 |
| H       | 1.723331  | 0.776226  | -1.396470 |
| H       | 0.851956  | -1.820320 | -0.235637 |
| S       | -1.980601 | -1.788389 | 0.238944  |
| O       | -2.480539 | -3.032008 | 0.700666  |
| O       | -0.613854 | -1.376995 | 0.564375  |
| O       | -2.142384 | -1.748068 | -1.325372 |
| O       | -2.931636 | -0.644301 | 0.763127  |
| H       | -1.839324 | -0.867583 | -1.673540 |
| H       | -2.521305 | 0.247712  | 0.582575  |
| S       | -0.931992 | 1.746236  | -1.014544 |
| O       | -1.410522 | 0.760144  | -1.977148 |
| O       | -1.620511 | 1.629267  | 0.300167  |
| O       | 0.512174  | 1.839044  | -0.840994 |
| O       | -1.322051 | 3.191345  | -1.602738 |
| H       | 1.190400  | 0.615028  | 1.542453  |
| H       | -2.214126 | 3.141050  | -1.976332 |
| C       | 0.174118  | 0.381397  | 3.333801  |
| N       | 0.537559  | 1.174865  | 2.127750  |
| C       | 1.177331  | 2.489825  | 2.408009  |
| H       | -0.266485 | -0.555492 | 3.000237  |
| H       | -0.539800 | 0.943652  | 3.934969  |
| H       | 1.075491  | 0.182549  | 3.911793  |
| H       | -0.300619 | 1.329607  | 1.539329  |
| H       | 1.390093  | 2.968780  | 1.454631  |
| H       | 2.102588  | 2.323991  | 2.957806  |
| H       | 0.495592  | 3.104846  | 2.994444  |
| 3SA2DMA |           |           |           |
| S       | 0.305583  | 2.815687  | -0.607035 |
| O       | 0.341053  | 4.037021  | -1.337894 |
| O       | 1.509161  | 2.255060  | -0.035351 |
| O       | -0.769877 | 3.018531  | 0.537947  |
| O       | -0.370055 | 1.690790  | -1.497424 |
| H       | -0.844065 | 2.192239  | 1.078442  |
| H       | 0.173812  | 0.834569  | -1.486350 |
| S       | -0.562618 | -0.484960 | 2.233167  |
| O       | 0.860469  | -0.250424 | 2.436203  |
| O       | -1.299299 | 0.635758  | 1.619604  |

|         |           |           |           |
|---------|-----------|-----------|-----------|
| O       | -0.881661 | -1.761124 | 1.586377  |
| O       | -1.234524 | -0.537498 | 3.707349  |
| H       | -0.020974 | -2.456404 | 0.216063  |
| H       | -0.738633 | -1.178014 | 4.236879  |
| S       | 0.369747  | -1.835052 | -1.812634 |
| O       | 1.112903  | -2.479262 | -2.851294 |
| O       | 0.539022  | -2.793910 | -0.521470 |
| O       | 0.956023  | -0.520642 | -1.363580 |
| O       | -1.076174 | -1.673570 | -2.027183 |
| H       | 2.341140  | -0.316601 | -0.333761 |
| H       | -2.138585 | -0.788976 | -1.135086 |
| C       | -3.522050 | 0.754836  | -1.385195 |
| N       | -2.875073 | -0.302307 | -0.561161 |
| C       | -3.804961 | -1.334824 | -0.029559 |
| H       | -2.749623 | 1.441865  | -1.723196 |
| H       | -4.259498 | 1.283229  | -0.781144 |
| H       | -4.006987 | 0.286514  | -2.241072 |
| H       | -2.365276 | 0.126465  | 0.232327  |
| H       | -4.270324 | -1.856508 | -0.864897 |
| H       | -4.566684 | -0.854291 | 0.584260  |
| H       | -3.225619 | -2.031128 | 0.573037  |
| C       | 3.420888  | -1.714446 | 0.753063  |
| N       | 2.957573  | -0.319142 | 0.510736  |
| C       | 4.061353  | 0.670251  | 0.372229  |
| H       | 4.076745  | -2.013207 | -0.063859 |
| H       | 2.553356  | -2.368685 | 0.773393  |
| H       | 3.958441  | -1.753685 | 1.699811  |
| H       | 2.309766  | -0.048483 | 1.269073  |
| H       | 4.681067  | 0.385145  | -0.477456 |
| H       | 4.660153  | 0.664388  | 1.283051  |
| H       | 3.623180  | 1.650164  | 0.207988  |
| 3SA3DMA |           |           |           |
| S       | 3.251574  | -0.654750 | 0.449502  |
| O       | 4.658055  | -0.781369 | 0.685675  |
| O       | 2.830598  | -0.749579 | -0.986233 |
| O       | 2.568934  | -1.922612 | 1.170826  |
| O       | 2.614622  | 0.546906  | 1.047170  |
| H       | 1.618464  | -1.954673 | 0.900379  |
| H       | 1.111132  | 0.551703  | 1.787154  |
| S       | -2.021300 | 1.948724  | -0.006256 |
| O       | -0.614226 | 2.380583  | -0.088382 |
| O       | -3.007388 | 2.982625  | 0.116447  |
| O       | -2.354308 | 1.199532  | -1.397388 |
| O       | -2.144642 | 0.862929  | 1.031257  |

|         |           |           |           |
|---------|-----------|-----------|-----------|
| H       | -1.614447 | 0.558956  | -1.583024 |
| H       | -2.935575 | -0.538670 | 0.508919  |
| S       | -0.273283 | -1.792646 | -1.070257 |
| O       | -0.320015 | -0.452820 | -1.693150 |
| O       | -1.449685 | -2.603572 | -1.377407 |
| O       | 0.955716  | -2.547170 | -1.729307 |
| O       | -0.009484 | -1.708828 | 0.383256  |
| H       | 1.769065  | -2.001437 | -1.545085 |
| H       | 0.749809  | 1.804303  | -1.119814 |
| C       | 1.312069  | 1.740986  | -3.117746 |
| N       | 1.629024  | 1.712897  | -1.664593 |
| C       | 2.568255  | 2.781346  | -1.229601 |
| H       | 0.650232  | 0.906700  | -3.334115 |
| H       | 2.238240  | 1.643947  | -3.683673 |
| H       | 0.824210  | 2.685130  | -3.358699 |
| H       | 2.029843  | 0.780834  | -1.417568 |
| H       | 2.104819  | 3.752811  | -1.398315 |
| H       | 3.490641  | 2.698493  | -1.803875 |
| H       | 2.781497  | 2.630784  | -0.174528 |
| C       | -3.552459 | -2.347144 | 1.329191  |
| N       | -3.423003 | -1.412233 | 0.181918  |
| C       | -4.706295 | -1.028392 | -0.464549 |
| H       | -2.550886 | -2.591358 | 1.678588  |
| H       | -4.055375 | -3.256360 | 1.001015  |
| H       | -4.125477 | -1.868758 | 2.123050  |
| H       | -2.783612 | -1.856163 | -0.514593 |
| H       | -4.484493 | -0.318951 | -1.259334 |
| H       | -5.351075 | -0.554660 | 0.275134  |
| H       | -5.189137 | -1.917937 | -0.868430 |
| C       | 0.258126  | -0.423268 | 3.404156  |
| N       | 0.285966  | 0.688387  | 2.420376  |
| C       | 0.400112  | 2.039287  | 3.030098  |
| H       | 0.138447  | -1.356981 | 2.860476  |
| H       | -0.574411 | -0.275953 | 4.092646  |
| H       | 1.199281  | -0.438582 | 3.952291  |
| H       | -0.573862 | 0.661564  | 1.832695  |
| H       | 1.344589  | 2.108013  | 3.568605  |
| H       | -0.436533 | 2.200679  | 3.709619  |
| H       | 0.364589  | 2.772081  | 2.227353  |
| 3SA4DMA |           |           |           |
| C       | -4.302433 | -2.735938 | -1.539920 |
| N       | -3.313966 | -2.388807 | -0.492664 |
| C       | -3.461992 | -3.149028 | 0.773184  |
| H       | -4.200161 | -3.789667 | -1.799222 |

|   |           |           |           |
|---|-----------|-----------|-----------|
| H | -4.104964 | -2.125688 | -2.420031 |
| H | -5.309901 | -2.534807 | -1.175343 |
| H | -3.407600 | -1.375012 | -0.259877 |
| H | -3.352097 | -4.213562 | 0.567691  |
| H | -4.437271 | -2.942180 | 1.213513  |
| H | -2.670798 | -2.822491 | 1.444427  |
| S | 0.185729  | -2.266320 | -0.620554 |
| O | 0.884764  | -1.368278 | -1.589150 |
| O | -0.485781 | -1.408694 | 0.435870  |
| O | -0.865930 | -3.063176 | -1.301339 |
| O | 1.184424  | -3.149375 | 0.046185  |
| H | -2.330045 | -2.575153 | -0.857980 |
| H | 2.633109  | -2.537920 | -0.132320 |
| C | 4.524838  | -2.497684 | 0.788368  |
| N | 3.548101  | -1.984108 | -0.197853 |
| C | 4.030286  | -1.983328 | -1.602774 |
| H | 4.070770  | -2.469619 | 1.778018  |
| H | 5.420948  | -1.876418 | 0.780503  |
| H | 4.785789  | -3.526649 | 0.540199  |
| H | 3.265542  | -1.018255 | 0.078679  |
| H | 3.209119  | -1.651203 | -2.233078 |
| H | 4.321593  | -2.997072 | -1.879038 |
| H | 4.881867  | -1.308999 | -1.697906 |
| S | 2.419018  | 1.619004  | -0.192233 |
| O | 3.630012  | 2.338266  | -0.484182 |
| O | 2.595654  | 0.451768  | 0.733219  |
| O | 1.297883  | 2.451216  | 0.301972  |
| O | 1.935358  | 0.988904  | -1.579195 |
| H | 0.004157  | 2.894146  | -0.702884 |
| H | 1.441744  | 0.112928  | -1.465124 |
| C | -0.596483 | 4.826602  | -1.114090 |
| N | -0.766331 | 3.358996  | -1.239870 |
| C | -0.759656 | 2.853349  | -2.638039 |
| H | -0.620639 | 5.090006  | -0.057995 |
| H | -1.407001 | 5.333922  | -1.637455 |
| H | 0.364026  | 5.116546  | -1.538719 |
| H | -1.655377 | 3.065748  | -0.770790 |
| H | -0.914086 | 1.778351  | -2.601693 |
| H | 0.204010  | 3.073257  | -3.095325 |
| H | -1.564721 | 3.333116  | -3.195360 |
| S | -2.731814 | 1.128616  | 0.543258  |
| O | -3.839510 | 0.178982  | 0.366661  |
| O | -3.035516 | 2.490377  | 0.088494  |
| O | -2.140657 | 1.066423  | 1.890307  |



|         |           |           |           |
|---------|-----------|-----------|-----------|
| O       | -1.575654 | 0.678360  | -0.476015 |
| H       | -0.490888 | 0.639458  | 2.154259  |
| H       | -1.108115 | -0.169897 | -0.131608 |
| C       | 0.778048  | 1.682557  | 3.397667  |
| N       | 0.451891  | 0.487631  | 2.577820  |
| C       | 0.434606  | -0.795131 | 3.327858  |
| H       | 0.818323  | 2.540674  | 2.731467  |
| H       | 1.749756  | 1.539337  | 3.870112  |
| H       | 0.004969  | 1.818644  | 4.153088  |
| H       | 1.143159  | 0.418749  | 1.804002  |
| H       | 0.249884  | -1.589341 | 2.607633  |
| H       | -0.361073 | -0.760406 | 4.071744  |
| H       | 1.397511  | -0.933894 | 3.820736  |
| 3SA5DMA |           |           |           |
| C       | 5.859489  | -1.906249 | -1.190501 |
| N       | 5.376455  | -1.502470 | 0.127096  |
| C       | 6.314986  | -1.838819 | 1.192898  |
| H       | 6.729722  | -1.303734 | -1.472526 |
| H       | 5.076036  | -1.742031 | -1.933627 |
| H       | 6.157573  | -2.967052 | -1.243073 |
| H       | 4.487057  | -1.966167 | 0.302800  |
| H       | 7.234253  | -1.253988 | 1.080182  |
| H       | 6.600266  | -2.904465 | 1.209756  |
| H       | 5.876418  | -1.591135 | 2.162801  |
| C       | 1.099363  | 4.320428  | 1.758428  |
| N       | 1.140270  | 3.820367  | 0.381163  |
| C       | 1.289463  | 4.898930  | -0.606157 |
| H       | 2.054534  | 4.789355  | 2.012192  |
| H       | 0.935310  | 3.490229  | 2.449377  |
| H       | 0.306260  | 5.064691  | 1.918728  |
| H       | 0.274188  | 3.318568  | 0.180747  |
| H       | 2.281719  | 5.351530  | -0.515145 |
| H       | 0.541420  | 5.693208  | -0.473639 |
| H       | 1.171604  | 4.480617  | -1.605012 |
| S       | -4.130528 | -0.065624 | 0.537142  |
| O       | -5.517711 | -0.122891 | 0.888729  |
| O       | -3.832390 | -0.206584 | -0.924034 |
| O       | -3.638077 | 1.413188  | 0.930077  |
| O       | -3.253778 | -1.005268 | 1.284209  |
| H       | -2.747657 | 1.581877  | 0.525516  |
| H       | -1.764722 | -0.616543 | 1.891446  |
| S       | 1.404864  | -1.885694 | 0.167748  |
| O       | 0.088031  | -2.528646 | 0.321644  |
| O       | 2.547079  | -2.742770 | 0.374726  |

|         |           |           |           |
|---------|-----------|-----------|-----------|
| O       | 1.519451  | -1.404067 | -1.358396 |
| O       | 1.444314  | -0.620936 | 0.971920  |
| H       | 0.734871  | -0.817106 | -1.558633 |
| H       | 2.238966  | 2.454153  | 0.100711  |
| S       | -0.976603 | 1.419354  | -1.547811 |
| O       | -0.658421 | -0.012917 | -1.747543 |
| O       | -0.057048 | 2.330373  | -2.194474 |
| O       | -2.388239 | 1.648200  | -2.250528 |
| O       | -1.172651 | 1.720539  | -0.102402 |
| H       | -3.042703 | 1.024035  | -1.838215 |
| H       | -1.357892 | -2.357424 | -0.721122 |
| C       | -1.927743 | -2.717075 | -2.684325 |
| N       | -2.242560 | -2.491451 | -1.248543 |
| C       | -3.005707 | -3.596375 | -0.609409 |
| H       | -1.407464 | -1.838030 | -3.055858 |
| H       | -2.857889 | -2.864139 | -3.232838 |
| H       | -1.295122 | -3.599460 | -2.777096 |
| H       | -2.784603 | -1.604154 | -1.147345 |
| H       | -2.403584 | -4.504210 | -0.628663 |
| H       | -3.936091 | -3.748891 | -1.155875 |
| H       | -3.226865 | -3.300908 | 0.413294  |
| C       | 3.117358  | 1.531593  | -1.565974 |
| N       | 2.835044  | 1.591439  | -0.103803 |
| C       | 4.062269  | 1.595281  | 0.739393  |
| H       | 2.174937  | 1.622308  | -2.103072 |
| H       | 3.601213  | 0.584754  | -1.795927 |
| H       | 3.773541  | 2.361912  | -1.829129 |
| H       | 2.268130  | 0.766269  | 0.178302  |
| H       | 3.763288  | 1.627246  | 1.786971  |
| H       | 4.654767  | 2.479291  | 0.500540  |
| H       | 4.630643  | 0.680740  | 0.541545  |
| C       | -1.021414 | 0.820183  | 3.187653  |
| N       | -0.906036 | -0.480422 | 2.482244  |
| C       | -0.794359 | -1.657612 | 3.382547  |
| H       | -1.067700 | 1.608294  | 2.440082  |
| H       | -0.154398 | 0.959367  | 3.834245  |
| H       | -1.935400 | 0.826245  | 3.780079  |
| H       | -0.078280 | -0.467700 | 1.849213  |
| H       | -1.700926 | -1.733578 | 3.981769  |
| H       | 0.077215  | -1.540244 | 4.026488  |
| H       | -0.675253 | -2.542045 | 2.760907  |
| 3SA6DMA |           |           |           |
| C       | 0.207672  | 5.691552  | 0.919715  |
| N       | -0.086358 | 4.541804  | 0.070645  |

|   |           |           |           |
|---|-----------|-----------|-----------|
| C | -1.072508 | 4.848881  | -0.963912 |
| H | 0.705964  | 6.468403  | 0.330863  |
| H | 0.887888  | 5.397632  | 1.723351  |
| H | -0.687860 | 6.145514  | 1.378036  |
| H | -0.440646 | 3.777107  | 0.639065  |
| H | -0.649051 | 5.562545  | -1.678581 |
| H | -2.004047 | 5.284551  | -0.565692 |
| H | -1.332532 | 3.936093  | -1.503076 |
| C | 5.961818  | 1.182864  | -2.391787 |
| N | 5.481253  | 0.953766  | -1.033298 |
| C | 6.573136  | 0.839803  | -0.067160 |
| H | 6.438558  | 2.166708  | -2.456248 |
| H | 5.122417  | 1.172707  | -3.092188 |
| H | 6.698770  | 0.435348  | -2.732845 |
| H | 4.931399  | 0.098715  | -1.004470 |
| H | 7.062949  | 1.811697  | 0.057460  |
| H | 7.345006  | 0.111459  | -0.367172 |
| H | 6.175266  | 0.522774  | 0.897913  |
| C | -6.816163 | 0.767681  | -0.539843 |
| N | -5.644092 | 0.197684  | 0.134360  |
| C | -5.971511 | -0.387983 | 1.441005  |
| H | -7.521692 | -0.027886 | -0.796802 |
| H | -6.505396 | 1.261401  | -1.462706 |
| H | -7.346873 | 1.502145  | 0.082145  |
| H | -4.955280 | 0.936935  | 0.292917  |
| H | -6.624320 | -1.256002 | 1.307800  |
| H | -6.482696 | 0.322328  | 2.105513  |
| H | -5.048506 | -0.710026 | 1.925635  |
| S | 3.233217  | -1.630623 | 0.968316  |
| O | 4.573233  | -1.815755 | 1.447152  |
| O | 3.138532  | -1.096523 | -0.429776 |
| O | 2.580171  | -3.097531 | 0.905912  |
| O | 2.353529  | -0.823152 | 1.848762  |
| H | 1.690817  | -3.013433 | 0.476499  |
| H | 0.724528  | -1.153558 | 2.118477  |
| S | -2.058580 | 1.110731  | 0.530538  |
| O | -0.774961 | 1.593154  | 1.066620  |
| O | -3.204693 | 1.961327  | 0.780683  |
| O | -1.917520 | 1.092572  | -1.073205 |
| O | -2.289707 | -0.316575 | 0.903309  |
| H | -1.153711 | 0.478764  | -1.308190 |
| H | -3.000280 | -1.139093 | -0.727134 |
| S | 0.104987  | -1.969429 | -1.509954 |
| O | 0.076951  | -0.485024 | -1.501089 |

|         |           |           |           |
|---------|-----------|-----------|-----------|
| O       | -0.935357 | -2.566807 | -2.323249 |
| O       | 1.487883  | -2.354026 | -2.208016 |
| O       | 0.170092  | -2.507753 | -0.133401 |
| H       | 2.211713  | -1.950075 | -1.663294 |
| H       | 0.955245  | 1.439700  | 0.152837  |
| C       | 1.890555  | 2.143700  | -1.560883 |
| N       | 1.916157  | 1.500251  | -0.215770 |
| C       | 2.779068  | 2.227893  | 0.759392  |
| H       | 1.302077  | 1.514346  | -2.224460 |
| H       | 2.917437  | 2.217771  | -1.915567 |
| H       | 1.441595  | 3.130487  | -1.448984 |
| H       | 2.263144  | 0.526217  | -0.307885 |
| H       | 2.396245  | 3.241914  | 0.861979  |
| H       | 3.794998  | 2.222395  | 0.362593  |
| H       | 2.744132  | 1.692261  | 1.705312  |
| C       | -3.719605 | -1.059036 | -2.684261 |
| N       | -3.825555 | -1.462640 | -1.253970 |
| C       | -3.963611 | -2.929209 | -1.053082 |
| H       | -3.592511 | 0.020830  | -2.722509 |
| H       | -4.634546 | -1.353851 | -3.199125 |
| H       | -2.851969 | -1.549975 | -3.120435 |
| H       | -4.621563 | -0.921779 | -0.785889 |
| H       | -4.039406 | -3.129552 | 0.014999  |
| H       | -3.080061 | -3.417355 | -1.461751 |
| H       | -4.864548 | -3.277368 | -1.558515 |
| C       | -0.404397 | -2.696013 | 2.930384  |
| N       | -0.220453 | -1.269488 | 2.557913  |
| C       | -0.301863 | -0.325756 | 3.703091  |
| H       | -0.396073 | -3.286555 | 2.018176  |
| H       | -1.356464 | -2.811719 | 3.449306  |
| H       | 0.414507  | -3.002308 | 3.580150  |
| H       | -0.928348 | -0.997940 | 1.846591  |
| H       | 0.515137  | -0.534347 | 4.392635  |
| H       | -1.261585 | -0.449437 | 4.204818  |
| H       | -0.221259 | 0.685518  | 3.311325  |
| 3SA7DMA |           |           |           |
| C       | -4.104760 | 3.275418  | 3.405847  |
| N       | -3.645392 | 3.695849  | 2.084275  |
| C       | -4.413554 | 4.821579  | 1.561518  |
| H       | -3.899462 | 4.063041  | 4.138328  |
| H       | -3.565180 | 2.377125  | 3.713627  |
| H       | -5.184702 | 3.054830  | 3.445203  |
| H       | -3.721896 | 2.907385  | 1.447200  |
| H       | -4.235444 | 5.709371  | 2.176868  |

|   |           |           |           |
|---|-----------|-----------|-----------|
| H | -5.502434 | 4.643854  | 1.541364  |
| H | -4.089757 | 5.052717  | 0.543382  |
| C | 5.038883  | 3.452250  | -0.964820 |
| N | 5.304526  | 2.225175  | -1.708790 |
| C | 6.471663  | 2.334990  | -2.577268 |
| H | 5.836919  | 3.628987  | -0.234864 |
| H | 4.094403  | 3.347345  | -0.427152 |
| H | 4.970995  | 4.349813  | -1.603983 |
| H | 4.483494  | 2.005266  | -2.269019 |
| H | 7.377530  | 2.450432  | -1.972498 |
| H | 6.426655  | 3.190255  | -3.273635 |
| H | 6.578901  | 1.422283  | -3.168367 |
| C | 4.684015  | -4.291202 | 2.069967  |
| N | 4.055048  | -3.125538 | 2.685220  |
| C | 4.102195  | -3.173802 | 4.144055  |
| H | 5.762344  | -4.277497 | 2.260886  |
| H | 4.532487  | -4.263602 | 0.988515  |
| H | 4.292699  | -5.252738 | 2.443730  |
| H | 3.085185  | -3.074619 | 2.382411  |
| H | 5.139560  | -3.095135 | 4.486368  |
| H | 3.682290  | -4.101345 | 4.569026  |
| H | 3.546050  | -2.330180 | 4.559900  |
| C | -5.016433 | -4.204062 | -2.734731 |
| N | -3.862412 | -3.545158 | -2.133303 |
| C | -2.998918 | -4.470660 | -1.401616 |
| H | -4.683091 | -4.896443 | -3.514575 |
| H | -5.665144 | -3.461100 | -3.205749 |
| H | -5.622539 | -4.783313 | -2.016447 |
| H | -4.172021 | -2.821067 | -1.492020 |
| H | -2.515364 | -5.160108 | -2.101592 |
| H | -3.539625 | -5.078691 | -0.656596 |
| H | -2.219472 | -3.912108 | -0.880001 |
| S | 1.551702  | 1.130826  | -2.016294 |
| O | 1.898965  | 1.533556  | -0.620056 |
| O | 2.493869  | 1.592347  | -3.006478 |
| O | 1.693479  | -0.477501 | -2.029152 |
| O | 0.132336  | 1.418718  | -2.294165 |
| H | 1.026200  | -0.853949 | -1.385423 |
| H | -1.130117 | 0.191958  | -2.305503 |
| S | -3.511203 | -0.097137 | 0.738174  |
| O | -3.691520 | -1.029701 | -0.375765 |
| O | -2.935962 | -0.702690 | 1.939185  |
| O | -2.898699 | 1.168022  | 0.317925  |
| O | -5.005609 | 0.391759  | 1.189999  |

|         |           |           |           |
|---------|-----------|-----------|-----------|
| H       | 0.404965  | 1.903462  | 0.436311  |
| H       | -5.372075 | -0.296759 | 1.761888  |
| S       | 0.353144  | -1.484837 | 1.064388  |
| O       | -0.150867 | -1.314001 | -0.323050 |
| O       | 1.557689  | -2.322269 | 1.110423  |
| O       | 0.513706  | -0.204928 | 1.753065  |
| O       | -0.750793 | -2.335896 | 1.835053  |
| H       | 2.984780  | 0.347664  | 0.169650  |
| H       | -1.573156 | -1.788252 | 1.900596  |
| C       | -0.250113 | 2.715284  | 2.251011  |
| N       | -0.417847 | 2.419037  | 0.800701  |
| C       | -0.630907 | 3.635862  | -0.030019 |
| H       | -1.139622 | 3.249003  | 2.585452  |
| H       | 0.638947  | 3.332953  | 2.381705  |
| H       | -0.133750 | 1.769111  | 2.772386  |
| H       | -1.237795 | 1.797789  | 0.684556  |
| H       | 0.243541  | 4.279652  | 0.060498  |
| H       | -1.518956 | 4.146494  | 0.337977  |
| H       | -0.746917 | 3.324067  | -1.065002 |
| C       | -2.975337 | 0.375461  | -3.210617 |
| N       | -1.923840 | -0.436564 | -2.544469 |
| C       | -1.420068 | -1.576390 | -3.363380 |
| H       | -3.310519 | 1.136652  | -2.508952 |
| H       | -3.807867 | -0.273151 | -3.477703 |
| H       | -2.552105 | 0.840872  | -4.099889 |
| H       | -2.317911 | -0.795476 | -1.659593 |
| H       | -0.600100 | -2.040994 | -2.821720 |
| H       | -1.062623 | -1.191434 | -4.317802 |
| H       | -2.234118 | -2.292019 | -3.484896 |
| C       | 4.646592  | -0.815600 | -0.283330 |
| N       | 3.577280  | -0.360387 | 0.650509  |
| C       | 4.084573  | 0.215721  | 1.923506  |
| H       | 4.163609  | -1.289269 | -1.136579 |
| H       | 5.281029  | -1.528590 | 0.241035  |
| H       | 5.202729  | 0.061780  | -0.620670 |
| H       | 2.947351  | -1.154556 | 0.874864  |
| H       | 4.735623  | 1.059286  | 1.696927  |
| H       | 4.619878  | -0.569583 | 2.454931  |
| H       | 3.226008  | 0.541575  | 2.508738  |
| 3SA8DMA |           |           |           |
| C       | 0.452434  | 5.412425  | -2.340871 |
| N       | -0.536494 | 5.072329  | -1.320263 |
| C       | -0.954903 | 6.234305  | -0.542867 |
| H       | -0.007122 | 6.048675  | -3.104606 |

|   |           |           |           |
|---|-----------|-----------|-----------|
| H | 0.809056  | 4.501695  | -2.826566 |
| H | 1.330881  | 5.944720  | -1.940756 |
| H | -0.137544 | 4.375151  | -0.696800 |
| H | -1.492973 | 6.937477  | -1.187074 |
| H | -0.116579 | 6.782918  | -0.080194 |
| H | -1.637474 | 5.922614  | 0.252055  |
| C | -3.839837 | -2.047355 | 4.599032  |
| N | -3.487058 | -0.638394 | 4.439493  |
| C | -4.302704 | 0.237255  | 5.275074  |
| H | -3.583252 | -2.382498 | 5.609440  |
| H | -3.273387 | -2.650409 | 3.886312  |
| H | -4.912278 | -2.250713 | 4.441152  |
| H | -3.606513 | -0.383891 | 3.462673  |
| H | -4.083514 | 0.051518  | 6.331507  |
| H | -5.388218 | 0.100763  | 5.131417  |
| H | -4.062316 | 1.282574  | 5.064699  |
| C | 5.102760  | 2.179867  | 2.522919  |
| N | 5.339737  | 2.195776  | 1.083162  |
| C | 6.500004  | 2.999120  | 0.712595  |
| H | 5.911045  | 1.641186  | 3.030084  |
| H | 4.162421  | 1.663384  | 2.725445  |
| H | 5.043915  | 3.186545  | 2.972461  |
| H | 4.510393  | 2.565325  | 0.623017  |
| H | 7.413120  | 2.538554  | 1.104538  |
| H | 6.461347  | 4.034564  | 1.092837  |
| H | 6.587440  | 3.040816  | -0.375723 |
| C | 4.686415  | -4.448646 | -2.514408 |
| N | 4.049371  | -4.336991 | -1.205037 |
| C | 4.063171  | -5.599138 | -0.470156 |
| H | 5.759590  | -4.629906 | -2.392760 |
| H | 4.562698  | -3.513421 | -3.065208 |
| H | 4.279900  | -5.265116 | -3.135178 |
| H | 3.086421  | -4.033095 | -1.329179 |
| H | 5.092650  | -5.868992 | -0.211489 |
| H | 3.630763  | -6.443009 | -1.033965 |
| H | 3.499949  | -5.491152 | 0.459904  |
| C | -5.152284 | -0.334241 | -4.765778 |
| N | -3.952565 | -0.510682 | -3.956090 |
| C | -3.138439 | -1.645562 | -4.385010 |
| H | -4.872885 | -0.057219 | -5.787552 |
| H | -5.760439 | 0.476646  | -4.356896 |
| H | -5.783360 | -1.238239 | -4.830293 |
| H | -4.206572 | -0.644148 | -2.981929 |
| H | -2.699994 | -1.439309 | -5.367083 |

|   |           |           |           |
|---|-----------|-----------|-----------|
| H | -3.707116 | -2.587781 | -4.466486 |
| H | -2.324028 | -1.802108 | -3.675157 |
| S | 1.591486  | 1.928224  | -0.001401 |
| O | 1.950770  | 0.946371  | 1.062631  |
| O | 2.531444  | 3.016535  | -0.138973 |
| O | 1.702016  | 1.107253  | -1.381106 |
| O | 0.176380  | 2.333908  | 0.126433  |
| H | 1.029001  | 0.362116  | -1.360529 |
| H | -1.160579 | 1.739998  | -0.965260 |
| S | -3.483270 | -1.077625 | 0.469954  |
| O | -3.694249 | -0.547770 | -0.878689 |
| O | -2.918954 | -2.427646 | 0.500179  |
| O | -2.841598 | -0.110427 | 1.364807  |
| O | -4.962695 | -1.228911 | 1.151897  |
| H | 0.472468  | 0.229720  | 1.961423  |
| H | -5.346107 | -2.054469 | 0.825061  |
| S | 0.365769  | -2.061033 | -0.640435 |
| O | -0.123063 | -0.779807 | -1.213866 |
| O | 1.568481  | -2.545261 | -1.329745 |
| O | 0.523448  | -1.988586 | 0.811419  |
| O | -0.747075 | -3.149061 | -0.972895 |
| H | 3.023795  | -0.366661 | 0.452859  |
| H | -1.565473 | -2.926016 | -0.459958 |
| C | -0.124110 | -0.910217 | 3.611560  |
| N | -0.339377 | 0.164629  | 2.601665  |
| C | -0.586117 | 1.502622  | 3.204007  |
| H | -1.014042 | -0.957452 | 4.240347  |
| H | 0.756391  | -0.661407 | 4.204822  |
| H | 0.030332  | -1.842159 | 3.074480  |
| H | -1.160287 | -0.086270 | 2.022072  |
| H | 0.285312  | 1.789473  | 3.791898  |
| H | -1.466743 | 1.435362  | 3.840237  |
| H | -0.732515 | 2.216486  | 2.397483  |
| C | -2.987709 | 2.637708  | -1.323633 |
| N | -1.961503 | 1.594910  | -1.606168 |
| C | -1.476062 | 1.602673  | -3.017220 |
| H | -3.322637 | 2.512565  | -0.295220 |
| H | -3.827174 | 2.491182  | -2.001470 |
| H | -2.523415 | 3.614696  | -1.467452 |
| H | -2.371521 | 0.671867  | -1.387134 |
| H | -0.664358 | 0.884131  | -3.098256 |
| H | -1.123293 | 2.605290  | -3.253213 |
| H | -2.302623 | 1.294962  | -3.658921 |
| C | 4.662139  | -0.588897 | -0.805214 |



|   |          |           |           |
|---|----------|-----------|-----------|
| N | 3.604648 | -1.147160 | 0.085491  |
| C | 4.129031 | -1.943604 | 1.226267  |
| H | 4.168298 | -0.104882 | -1.646262 |
| H | 5.289055 | -1.409249 | -1.151314 |
| H | 5.229519 | 0.152709  | -0.239012 |
| H | 2.960921 | -1.745272 | -0.468687 |
| H | 4.803493 | -1.321237 | 1.813367  |
| H | 4.641984 | -2.812105 | 0.816053  |
| H | 3.281125 | -2.264176 | 1.829751  |

#### 4DMA

|   |           |           |           |
|---|-----------|-----------|-----------|
| C | -0.195554 | 3.258121  | -0.779933 |
| N | -0.179458 | 2.193655  | 0.217309  |
| C | -0.163995 | 2.710202  | 1.581572  |
| H | -1.134986 | 3.817878  | -0.717938 |
| H | -0.130511 | 2.826488  | -1.781628 |
| H | 0.629371  | 3.982902  | -0.665385 |
| H | 0.644660  | 1.599686  | 0.071141  |
| H | -1.102137 | 3.232686  | 1.797647  |
| H | 0.660951  | 3.417491  | 1.776395  |
| H | -0.073238 | 1.881394  | 2.287963  |
| C | 0.193559  | -3.257656 | -0.779618 |
| N | 0.179750  | -2.193321 | 0.217766  |
| C | 0.167805  | -2.709757 | 1.582041  |
| H | 1.133526  | -3.816846 | -0.720581 |
| H | 0.125199  | -2.825957 | -1.781061 |
| H | -0.630546 | -3.983020 | -0.662783 |
| H | -0.644535 | -1.599365 | 0.073415  |
| H | 1.105938  | -3.233453 | 1.795157  |
| H | -0.657445 | -3.415959 | 1.779506  |
| H | 0.080381  | -1.880838 | 2.288734  |
| C | 3.258367  | 0.193995  | 0.779470  |
| N | 2.194634  | 0.179878  | -0.218537 |
| C | 2.711938  | 0.165736  | -1.582487 |
| H | 3.983362  | -0.630587 | 0.663667  |
| H | 2.825979  | 0.126533  | 1.780661  |
| H | 3.818066  | 1.133631  | 0.720042  |
| H | 1.599910  | -0.643762 | -0.073406 |
| H | 3.417904  | -0.660116 | -1.778312 |
| H | 3.236201  | 1.103308  | -1.796642 |
| H | 1.883406  | 0.077638  | -2.289538 |
| C | -2.713043 | -0.167394 | -1.581252 |
| N | -2.195300 | -0.180195 | -0.217419 |
| C | -3.258814 | -0.193241 | 0.780909  |
| H | -3.238101 | -1.104842 | -1.794006 |

H -1.884678 -0.080889 -2.288709  
H -3.418433 0.658748 -1.777887  
H -1.600722 0.643700 -0.073386  
H -3.818853 -1.132711 0.722171  
H -3.983509 0.631531 0.664762  
H -2.826114 -0.125426 1.781947

#### 4SA

S -1.675947 1.783399 -1.378037  
O -0.943518 1.580619 -0.131993  
O -1.733535 3.073251 -1.965417  
O -1.124545 0.702497 -2.394366  
O -3.147066 1.277984 -1.181972  
H -0.194339 0.463227 -2.165468  
H -3.146860 0.465154 -0.628120  
S 1.899532 -1.417316 -1.570229  
O 1.370377 -0.042713 -1.526733  
O 2.911979 -1.748645 -2.500149  
O 2.386595 -1.755805 -0.112866  
O 0.687595 -2.384906 -1.816568  
H 1.953372 -1.170387 0.560063  
H 0.041920 -2.344641 -1.071637  
S -1.847409 -1.601601 1.178711  
O -0.769160 -2.244615 0.459667  
O -2.889547 -0.945893 0.451686  
O -2.603312 -2.665640 2.073597  
O -1.230026 -0.680724 2.279398  
H -1.966244 -3.180954 2.593628  
H -0.308999 -0.371948 2.028478  
S 1.788021 1.404384 1.666738  
O 1.221001 0.037043 1.583309  
O 2.734703 1.694918 2.676387  
O 2.412581 1.704707 0.258759  
O 0.596821 2.402698 1.809574  
H 2.014705 1.135591 -0.450817  
H -0.068250 2.263884 1.080463

#### 4SA1DMA

S 0.302579 2.654666 -0.576085  
O 0.920076 3.917169 -0.758219  
O 0.949431 1.627781 0.242122  
O -1.131831 2.893923 0.035426  
O 0.031722 2.051744 -2.002908  
H -1.505667 2.061186 0.416151  
H -0.338150 1.130159 -1.964779  
S 3.790227 -0.513403 0.280457

|         |           |           |           |
|---------|-----------|-----------|-----------|
| O       | 5.181563  | -0.748909 | 0.417988  |
| O       | 2.872079  | -0.854782 | 1.357825  |
| O       | 3.599767  | 1.017297  | -0.053932 |
| O       | 3.305412  | -1.258735 | -1.026093 |
| H       | 2.654313  | 1.285439  | 0.054607  |
| H       | 2.327223  | -1.383511 | -1.010911 |
| S       | -3.440123 | 0.037646  | 0.642555  |
| O       | -2.099636 | 0.537322  | 0.992131  |
| O       | -4.569733 | 0.568412  | 1.311084  |
| O       | -3.611569 | 0.231292  | -0.906138 |
| O       | -3.424221 | -1.519021 | 0.850440  |
| H       | -2.751082 | 0.042048  | -1.378308 |
| H       | -2.771461 | -1.947577 | 0.223521  |
| S       | -0.626782 | -1.635750 | -1.502439 |
| O       | 0.611065  | -1.488664 | -0.760904 |
| O       | -1.208152 | -0.335417 | -1.937963 |
| O       | -0.174986 | -2.401797 | -2.835240 |
| O       | -1.640069 | -2.465594 | -0.848575 |
| H       | -0.955554 | -2.594627 | -3.376479 |
| H       | -0.459240 | -0.221924 | 1.604184  |
| C       | 0.496402  | 0.269664  | 3.364541  |
| N       | 0.273673  | -0.630231 | 2.197847  |
| C       | -0.104850 | -2.027789 | 2.550553  |
| H       | 0.755501  | 1.255469  | 2.984118  |
| H       | 1.317451  | -0.125019 | 3.960328  |
| H       | -0.415785 | 0.321689  | 3.957308  |
| H       | 1.148771  | -0.657971 | 1.641472  |
| H       | -0.225250 | -2.589267 | 1.626679  |
| H       | -1.039754 | -2.016716 | 3.109115  |
| H       | 0.691898  | -2.465714 | 3.149354  |
| 4SA2DMA |           |           |           |
| S       | 4.228417  | -0.238587 | 0.285704  |
| O       | 3.373637  | 0.864496  | -0.125384 |
| O       | 5.479814  | 0.027491  | 0.901240  |
| O       | 3.391563  | -1.166504 | 1.253067  |
| O       | 4.499788  | -1.149580 | -0.972339 |
| H       | 2.459233  | -1.251263 | 0.916017  |
| H       | 3.637841  | -1.435539 | -1.375529 |
| S       | -2.597633 | 1.357291  | -1.243285 |
| O       | -3.245747 | 0.804595  | -0.050709 |
| O       | -1.575087 | 2.365399  | -0.972568 |
| O       | -2.145554 | 0.314380  | -2.178424 |
| O       | -3.825858 | 2.115129  | -1.974324 |
| H       | -0.522674 | -0.045259 | -2.094906 |

|         |           |           |           |
|---------|-----------|-----------|-----------|
| H       | -3.494939 | 2.497005  | -2.799886 |
| S       | -1.382124 | 0.252236  | 2.664946  |
| O       | -0.220353 | 0.619598  | 1.634665  |
| O       | -1.927748 | -1.026456 | 2.245944  |
| O       | -0.924537 | 0.425203  | 4.000372  |
| O       | -2.407953 | 1.396956  | 2.366381  |
| H       | -1.755550 | -2.426801 | -0.580982 |
| H       | -2.789995 | 1.269201  | 1.449079  |
| S       | 0.791427  | -1.545821 | -1.244381 |
| O       | -0.338719 | -2.426704 | -1.524570 |
| O       | 2.065755  | -1.954510 | -1.801188 |
| O       | 0.457140  | -0.135402 | -1.927956 |
| O       | 0.906991  | -1.251626 | 0.220935  |
| H       | 0.169854  | 2.216723  | -0.476821 |
| H       | 0.114946  | -0.185063 | 1.139670  |
| C       | -3.790086 | -2.403336 | -0.995447 |
| N       | -2.648933 | -2.473072 | -0.040481 |
| C       | -2.620022 | -3.693635 | 0.812785  |
| H       | -3.665194 | -1.512511 | -1.605431 |
| H       | -4.723251 | -2.353456 | -0.436076 |
| H       | -3.773943 | -3.293560 | -1.623306 |
| H       | -2.642906 | -1.651878 | 0.583414  |
| H       | -2.511181 | -4.568897 | 0.173927  |
| H       | -3.545107 | -3.754184 | 1.384359  |
| H       | -1.774983 | -3.613051 | 1.492430  |
| C       | 1.626701  | 3.054458  | -1.674581 |
| N       | 1.163559  | 2.487221  | -0.377642 |
| C       | 1.304965  | 3.407454  | 0.785349  |
| H       | 1.488149  | 2.295720  | -2.441513 |
| H       | 2.682359  | 3.305228  | -1.589980 |
| H       | 1.035786  | 3.939526  | -1.905311 |
| H       | 1.725401  | 1.641173  | -0.196801 |
| H       | 0.714324  | 4.303615  | 0.600724  |
| H       | 2.356959  | 3.660305  | 0.906823  |
| H       | 0.936700  | 2.892687  | 1.669440  |
| 4SA3DMA |           |           |           |
| S       | -4.767861 | -0.817303 | -0.502366 |
| O       | -6.016461 | -0.931299 | -1.170582 |
| O       | -4.274706 | 0.496353  | -0.115844 |
| O       | -4.826863 | -1.723898 | 0.783435  |
| O       | -3.664423 | -1.498860 | -1.402346 |
| H       | -3.941625 | -1.739099 | 1.243076  |
| H       | -2.758509 | -1.351570 | -0.996507 |
| S       | 4.311428  | -0.212272 | -0.829625 |

|   |           |           |           |
|---|-----------|-----------|-----------|
| O | 5.688742  | -0.513905 | -1.074461 |
| O | 4.057454  | 0.757045  | 0.287761  |
| O | 3.778174  | 0.524244  | -2.156107 |
| O | 3.427471  | -1.390360 | -0.630955 |
| H | 2.868580  | 0.862388  | -1.973498 |
| H | 1.890538  | -1.531422 | -1.288592 |
| S | -1.199374 | -1.196970 | 1.208961  |
| O | 0.104941  | -1.734422 | 1.593842  |
| O | -2.355724 | -1.838236 | 1.813410  |
| O | -1.263089 | 0.312231  | 1.721579  |
| O | -1.315690 | -1.122191 | -0.283576 |
| H | -0.399125 | 0.766718  | 1.462537  |
| H | -1.543373 | 2.730948  | -0.159383 |
| S | 1.128475  | 2.119656  | -0.240819 |
| O | 0.958723  | 1.378282  | 1.034836  |
| O | 0.100837  | 3.140931  | -0.428037 |
| O | 2.490538  | 2.916129  | -0.094205 |
| O | 1.271506  | 1.205520  | -1.384516 |
| H | 3.211625  | 2.241347  | 0.043483  |
| H | 1.743177  | -0.901325 | 1.913121  |
| C | 2.512228  | 0.208151  | 3.480263  |
| N | 2.677890  | -0.654180 | 2.279184  |
| C | 3.441126  | -1.907324 | 2.529449  |
| H | 1.967955  | 1.099789  | 3.179868  |
| H | 3.497219  | 0.478136  | 3.859704  |
| H | 1.955577  | -0.339480 | 4.240207  |
| H | 3.154221  | -0.105879 | 1.526275  |
| H | 2.894396  | -2.521624 | 3.244001  |
| H | 4.422659  | -1.650093 | 2.926181  |
| H | 3.556000  | -2.424325 | 1.580061  |
| C | -2.989924 | 3.179266  | 1.270596  |
| N | -2.581284 | 2.656943  | -0.063346 |
| C | -3.207841 | 3.362984  | -1.214682 |
| H | -2.516892 | 2.565049  | 2.033588  |
| H | -4.072293 | 3.104564  | 1.360373  |
| H | -2.666283 | 4.215369  | 1.360478  |
| H | -2.862358 | 1.664481  | -0.105853 |
| H | -2.820501 | 2.932403  | -2.136361 |
| H | -2.947730 | 4.419487  | -1.167911 |
| H | -4.286686 | 3.227114  | -1.168335 |
| C | 0.918642  | -1.499308 | -3.131102 |
| N | 0.988500  | -1.880064 | -1.695251 |
| C | 0.920721  | -3.343889 | -1.441651 |
| H | 0.910535  | -0.413963 | -3.193328 |

|         |           |           |           |
|---------|-----------|-----------|-----------|
| H       | 0.007206  | -1.907703 | -3.567720 |
| H       | 1.792591  | -1.895244 | -3.646602 |
| H       | 0.212003  | -1.427615 | -1.177681 |
| H       | 1.786604  | -3.824300 | -1.894963 |
| H       | -0.000559 | -3.742772 | -1.865040 |
| H       | 0.925486  | -3.499835 | -0.364810 |
| 4SA4DMA |           |           |           |
| S       | 3.911153  | 0.296477  | 0.069998  |
| O       | 5.070019  | 0.763299  | 0.772866  |
| O       | 3.975999  | -1.055004 | -0.500850 |
| O       | 2.725639  | 0.234856  | 1.198476  |
| O       | 3.364264  | 1.262431  | -0.938264 |
| H       | 1.878078  | 0.162363  | 0.688634  |
| H       | 1.326900  | -2.944675 | 0.225945  |
| C       | 2.948609  | -3.813245 | 1.149569  |
| N       | 2.310433  | -3.170113 | -0.028814 |
| C       | 2.317699  | -4.006106 | -1.260001 |
| H       | 2.914022  | -3.115024 | 1.983547  |
| H       | 3.985938  | -4.045052 | 0.911860  |
| H       | 2.399977  | -4.718710 | 1.404226  |
| H       | 2.821729  | -2.281003 | -0.226774 |
| H       | 1.854062  | -3.430870 | -2.057420 |
| H       | 1.749875  | -4.917478 | -1.075113 |
| H       | 3.348420  | -4.247241 | -1.517636 |
| S       | 0.266075  | -0.125167 | -1.670999 |
| O       | 0.366855  | -1.573741 | -1.892724 |
| O       | -0.995062 | 0.439666  | -2.163935 |
| O       | 0.529376  | 0.251990  | -0.267915 |
| O       | 1.389627  | 0.568080  | -2.552096 |
| H       | -0.978850 | 1.066274  | 1.777796  |
| H       | 2.220512  | 0.710327  | -2.012272 |
| S       | -1.999569 | 2.995266  | 0.160195  |
| O       | -2.980503 | 1.891961  | 0.228831  |
| O       | -2.514676 | 4.322179  | 0.345137  |
| O       | -0.831124 | 2.675060  | 1.045440  |
| O       | -1.407591 | 2.975993  | -1.338458 |
| H       | 0.767542  | 2.942392  | 0.368731  |
| H       | -1.273635 | 2.040532  | -1.642734 |
| S       | -1.583094 | -3.081742 | 0.622695  |
| O       | -2.328668 | -4.212064 | 1.097267  |
| O       | -0.196614 | -2.956353 | 1.106412  |
| O       | -1.501684 | -3.264276 | -0.976055 |
| O       | -2.295073 | -1.770096 | 0.812764  |
| H       | -0.848286 | -2.615573 | -1.346870 |

|   |           |           |           |
|---|-----------|-----------|-----------|
| H | -3.221646 | -1.055350 | -0.424192 |
| C | -0.080441 | -0.211638 | 3.175521  |
| N | -1.239274 | 0.242460  | 2.363800  |
| C | -2.423587 | 0.619660  | 3.180666  |
| H | -0.382727 | -1.069065 | 3.775448  |
| H | 0.245393  | 0.602908  | 3.822236  |
| H | 0.725818  | -0.506298 | 2.511396  |
| H | -1.520699 | -0.523695 | 1.710148  |
| H | -2.135478 | 1.395656  | 3.889329  |
| H | -2.786087 | -0.259992 | 3.711472  |
| H | -3.185001 | 1.008714  | 2.509141  |
| C | -3.882133 | -0.771117 | -2.398555 |
| N | -3.868630 | -0.422457 | -0.951592 |
| C | -5.201133 | -0.489707 | -0.297568 |
| H | -2.876312 | -0.637541 | -2.788119 |
| H | -4.576630 | -0.109996 | -2.917256 |
| H | -4.199155 | -1.807672 | -2.508211 |
| H | -3.474233 | 0.526160  | -0.789626 |
| H | -5.087588 | -0.224078 | 0.750930  |
| H | -5.589470 | -1.504261 | -0.379448 |
| H | -5.877236 | 0.213860  | -0.782038 |
| C | 1.587446  | 4.362539  | -0.904063 |
| N | 1.722226  | 3.282126  | 0.111873  |
| C | 2.423473  | 3.697530  | 1.357384  |
| H | 1.029121  | 3.970207  | -1.750643 |
| H | 2.581136  | 4.683209  | -1.214736 |
| H | 1.036158  | 5.194412  | -0.467697 |
| H | 2.257363  | 2.490729  | -0.303336 |
| H | 1.838975  | 4.470849  | 1.853953  |
| H | 3.414348  | 4.070788  | 1.101950  |
| H | 2.525483  | 2.823406  | 1.997412  |

#### 4SA5DMA

|   |           |           |           |
|---|-----------|-----------|-----------|
| C | -4.243893 | -0.365002 | -2.552672 |
| N | -4.363159 | 0.484280  | -1.359125 |
| C | -5.617490 | 1.248059  | -1.324003 |
| H | -4.992638 | -1.162077 | -2.520832 |
| H | -3.252267 | -0.818559 | -2.578588 |
| H | -4.391081 | 0.200516  | -3.483506 |
| H | -3.592510 | 1.155248  | -1.359290 |
| H | -6.466953 | 0.570175  | -1.193000 |
| H | -5.784069 | 1.822022  | -2.246213 |
| H | -5.588466 | 1.947188  | -0.486690 |
| S | -1.995788 | 2.686261  | 0.461782  |
| O | -3.225870 | 3.077099  | 1.103687  |

|   |           |           |           |
|---|-----------|-----------|-----------|
| O | -0.806657 | 3.480628  | 0.801019  |
| O | -1.715201 | 1.190936  | 1.057773  |
| O | -2.114703 | 2.479394  | -1.007196 |
| H | -0.949202 | 0.817689  | 0.552436  |
| H | 2.362267  | 2.601843  | 0.443138  |
| C | 2.288943  | 4.518334  | 1.192241  |
| N | 1.871394  | 3.495256  | 0.198567  |
| C | 2.173817  | 3.868508  | -1.210621 |
| H | 2.030680  | 4.161644  | 2.187295  |
| H | 1.761476  | 5.450042  | 0.991749  |
| H | 3.366045  | 4.665012  | 1.124198  |
| H | 0.845627  | 3.341139  | 0.310344  |
| H | 1.759883  | 3.110444  | -1.871376 |
| H | 3.253767  | 3.924769  | -1.338529 |
| H | 1.712795  | 4.831974  | -1.427607 |
| S | 0.434446  | 0.290469  | -1.788277 |
| O | 1.777135  | 0.120452  | -2.347203 |
| O | -0.473703 | -0.804800 | -2.153505 |
| O | 0.455238  | 0.550047  | -0.333289 |
| O | -0.105176 | 1.622281  | -2.471774 |
| H | 0.320827  | -1.123937 | 1.927178  |
| H | -0.890003 | 1.973551  | -1.949024 |
| S | -0.990774 | -3.096700 | 0.662723  |
| O | 0.457336  | -3.307496 | 0.458550  |
| O | -1.728885 | -4.230565 | 1.149271  |
| O | -1.204980 | -1.843196 | 1.449400  |
| O | -1.625831 | -2.790347 | -0.785047 |
| H | -2.881841 | -1.035805 | 1.161146  |
| H | -1.155923 | -2.032675 | -1.220835 |
| S | 4.090020  | 0.409214  | 0.371923  |
| O | 5.483144  | 0.310378  | 0.705181  |
| O | 3.326543  | 1.404475  | 1.162850  |
| O | 4.042160  | 0.925016  | -1.155014 |
| O | 3.344581  | -0.885041 | 0.368883  |
| H | 3.182546  | 0.660717  | -1.570657 |
| H | 2.794047  | -1.936426 | -1.033542 |
| C | 0.996500  | 0.486500  | 3.064214  |
| N | 1.228370  | -0.769763 | 2.300963  |
| C | 1.860399  | -1.850359 | 3.103783  |
| H | 1.959518  | 0.918228  | 3.326687  |
| H | 0.415844  | 0.251753  | 3.956305  |
| H | 0.435132  | 1.176744  | 2.440575  |
| H | 1.840586  | -0.583156 | 1.484404  |
| H | 1.231364  | -2.064323 | 3.967506  |



|   |           |           |           |
|---|-----------|-----------|-----------|
| H | 2.848915  | -1.525749 | 3.424686  |
| H | 1.933633  | -2.735690 | 2.477619  |
| C | 2.183766  | -2.998796 | -2.753905 |
| N | 2.489630  | -2.891990 | -1.301145 |
| C | 3.531534  | -3.839635 | -0.822801 |
| H | 1.393673  | -2.293159 | -2.994789 |
| H | 1.863900  | -4.018568 | -2.968007 |
| H | 3.078971  | -2.758650 | -3.326141 |
| H | 1.621426  | -3.051920 | -0.741756 |
| H | 3.730346  | -3.627619 | 0.224781  |
| H | 4.443254  | -3.690897 | -1.400310 |
| H | 3.169556  | -4.860002 | -0.942549 |
| C | -4.537464 | -2.244157 | 0.949233  |
| N | -3.902534 | -0.902830 | 1.046509  |
| C | -4.411453 | -0.071594 | 2.169892  |
| H | -4.097721 | -2.776407 | 0.108646  |
| H | -5.610829 | -2.119807 | 0.803831  |
| H | -4.343443 | -2.807203 | 1.860936  |
| H | -4.054925 | -0.372769 | 0.120310  |
| H | -4.172296 | -0.559994 | 3.114882  |
| H | -5.492884 | 0.029545  | 2.074125  |
| H | -3.940386 | 0.907339  | 2.118785  |

#### 4SA6DMA

|   |           |           |           |
|---|-----------|-----------|-----------|
| C | 4.941800  | -2.564914 | 2.429920  |
| N | 5.140823  | -2.425018 | 0.989454  |
| C | 6.486378  | -2.811335 | 0.574158  |
| H | 4.971454  | -3.623090 | 2.713023  |
| H | 3.962153  | -2.163435 | 2.696497  |
| H | 5.703245  | -2.039647 | 3.031147  |
| H | 4.978294  | -1.449944 | 0.745219  |
| H | 6.632113  | -3.885096 | 0.732448  |
| H | 7.286348  | -2.283653 | 1.121051  |
| H | 6.616958  | -2.611063 | -0.492215 |
| C | 2.354568  | 3.848761  | -3.337696 |
| N | 2.586241  | 3.626917  | -1.905157 |
| C | 3.715319  | 4.404700  | -1.379650 |
| H | 2.040212  | 4.882921  | -3.507066 |
| H | 1.560122  | 3.184247  | -3.681706 |
| H | 3.252001  | 3.666306  | -3.946053 |
| H | 2.786267  | 2.639184  | -1.760420 |
| H | 3.480387  | 5.472796  | -1.417943 |
| H | 4.642137  | 4.242609  | -1.947927 |
| H | 3.893218  | 4.120995  | -0.341445 |
| S | -1.816009 | -3.738300 | -0.895122 |

|   |           |           |           |
|---|-----------|-----------|-----------|
| O | -1.788396 | -5.135456 | -0.574269 |
| O | -3.108161 | -3.173388 | -1.306024 |
| O | -1.438324 | -2.972364 | 0.504592  |
| O | -0.729592 | -3.291732 | -1.825570 |
| H | -1.213775 | -2.043313 | 0.241754  |
| H | -3.854675 | -0.432636 | 0.461868  |
| C | -5.144994 | -1.913986 | 1.069094  |
| N | -4.433292 | -1.167048 | -0.000777 |
| C | -5.330508 | -0.522019 | -0.996874 |
| H | -4.401833 | -2.375782 | 1.716313  |
| H | -5.762216 | -2.688375 | 0.615634  |
| H | -5.756373 | -1.219867 | 1.643695  |
| H | -3.809053 | -1.839101 | -0.500399 |
| H | -4.707884 | -0.049220 | -1.752284 |
| H | -5.942396 | 0.225751  | -0.493925 |
| H | -5.960041 | -1.285487 | -1.453041 |
| S | -0.967393 | 0.163275  | -1.591558 |
| O | -2.364626 | 0.597637  | -1.702678 |
| O | -0.009774 | 1.263163  | -1.786036 |
| O | -0.692074 | -0.582863 | -0.348691 |
| O | -0.681230 | -0.830701 | -2.796913 |
| H | 0.714358  | -0.068569 | 2.015920  |
| H | -0.838801 | -1.776983 | -2.509308 |
| S | 2.805020  | 0.635999  | 0.482199  |
| O | 2.188854  | 1.872802  | 0.964422  |
| O | 4.246181  | 0.552811  | 0.557052  |
| O | 2.116200  | -0.563384 | 1.052609  |
| O | 2.500244  | 0.572553  | -1.116314 |
| H | 1.826324  | -1.967676 | -0.054464 |
| H | 1.545346  | 0.788873  | -1.295380 |
| S | -2.940377 | 2.130574  | 1.410727  |
| O | -3.593987 | 3.104458  | 2.241452  |
| O | -3.315403 | 0.721128  | 1.653635  |
| O | -3.426228 | 2.471911  | -0.092589 |
| O | -1.452697 | 2.256332  | 1.372916  |
| H | -3.002164 | 1.826706  | -0.713427 |
| H | -0.079907 | 2.937771  | 0.014830  |
| C | -0.833798 | -0.800903 | 3.216595  |
| N | -0.014048 | 0.306291  | 2.660336  |
| C | 0.653975  | 1.131289  | 3.701903  |
| H | -1.638452 | -0.379797 | 3.816768  |
| H | -0.198854 | -1.441950 | 3.828896  |
| H | -1.261208 | -1.374940 | 2.400221  |
| H | -0.616580 | 0.942856  | 2.085396  |

|         |           |           |           |
|---------|-----------|-----------|-----------|
| H       | 1.272907  | 0.487125  | 4.326553  |
| H       | -0.105930 | 1.623543  | 4.307905  |
| H       | 1.278637  | 1.864171  | 3.198199  |
| C       | -0.854232 | 4.385688  | -1.215628 |
| N       | 0.216936  | 3.859706  | -0.328267 |
| C       | 0.502796  | 4.714546  | 0.852396  |
| H       | -0.976774 | 3.686613  | -2.039973 |
| H       | -0.557246 | 5.366141  | -1.588582 |
| H       | -1.785517 | 4.453498  | -0.656953 |
| H       | 1.107895  | 3.729811  | -0.897757 |
| H       | 1.321122  | 4.257894  | 1.404912  |
| H       | -0.388640 | 4.763459  | 1.475015  |
| H       | 0.787754  | 5.710608  | 0.512662  |
| C       | 2.778094  | -2.763886 | -1.716217 |
| N       | 1.773845  | -2.840942 | -0.617483 |
| C       | 1.978199  | -4.006335 | 0.289122  |
| H       | 2.600771  | -1.851917 | -2.281931 |
| H       | 2.663658  | -3.638083 | -2.356408 |
| H       | 3.767683  | -2.739551 | -1.262696 |
| H       | 0.822484  | -2.911950 | -1.031292 |
| H       | 2.974856  | -3.924472 | 0.720296  |
| H       | 1.875942  | -4.923170 | -0.290266 |
| H       | 1.206821  | -3.982097 | 1.056479  |
| 4SA7DMA |           |           |           |
| C       | 6.216997  | -0.310614 | -2.829614 |
| N       | 5.755872  | -0.599689 | -1.475147 |
| C       | 6.778987  | -1.261316 | -0.667012 |
| H       | 7.017992  | 0.435512  | -2.798266 |
| H       | 5.397234  | 0.104147  | -3.422018 |
| H       | 6.608860  | -1.194573 | -3.361398 |
| H       | 4.934364  | -1.197045 | -1.517168 |
| H       | 7.593804  | -0.561534 | -0.452239 |
| H       | 7.218360  | -2.145787 | -1.158074 |
| H       | 6.342052  | -1.590070 | 0.277199  |
| C       | 2.816323  | 4.198695  | 3.181109  |
| N       | 3.057358  | 4.353211  | 1.749539  |
| C       | 3.889110  | 5.512986  | 1.444926  |
| H       | 3.750734  | 3.947317  | 3.695317  |
| H       | 2.107752  | 3.382967  | 3.338409  |
| H       | 2.408131  | 5.105595  | 3.659401  |
| H       | 2.155702  | 4.449865  | 1.286982  |
| H       | 4.899038  | 5.362163  | 1.840615  |
| H       | 3.504461  | 6.457372  | 1.867195  |
| H       | 3.971384  | 5.635386  | 0.362117  |

|   |           |           |           |
|---|-----------|-----------|-----------|
| C | -2.891459 | 3.499089  | -3.806253 |
| N | -2.796724 | 3.568892  | -2.343512 |
| C | -3.259238 | 4.853457  | -1.801471 |
| H | -3.941543 | 3.530133  | -4.111722 |
| H | -2.458601 | 2.559508  | -4.154654 |
| H | -2.371482 | 4.328874  | -4.306174 |
| H | -1.822675 | 3.444225  | -2.073340 |
| H | -4.333403 | 4.964952  | -1.978637 |
| H | -2.750283 | 5.713226  | -2.259428 |
| H | -3.073978 | 4.873866  | -0.727039 |
| S | 2.722720  | -2.851727 | -0.078689 |
| O | 3.984999  | -3.244711 | 0.480598  |
| O | 1.866318  | -3.922817 | -0.602993 |
| O | 1.887875  | -2.192945 | 1.159944  |
| O | 2.816929  | -1.724217 | -1.064569 |
| H | 1.129028  | -1.712089 | 0.739147  |
| H | -1.276102 | -3.772274 | 0.560365  |
| C | -0.382836 | -5.419061 | 1.410875  |
| N | -0.668204 | -4.555906 | 0.235010  |
| C | -1.341613 | -5.259007 | -0.890069 |
| H | 0.141043  | -4.822370 | 2.155132  |
| H | 0.249720  | -6.249733 | 1.100917  |
| H | -1.322703 | -5.782463 | 1.823570  |
| H | 0.238444  | -4.170397 | -0.107987 |
| H | -1.458657 | -4.550309 | -1.706017 |
| H | -2.316738 | -5.612370 | -0.557221 |
| H | -0.720743 | -6.096668 | -1.206523 |
| S | -0.551507 | -0.909782 | -1.455604 |
| O | -1.333193 | -2.130215 | -1.684570 |
| O | -1.280203 | 0.311501  | -1.828386 |
| O | -0.000723 | -0.827091 | -0.089162 |
| O | 0.690093  | -0.943696 | -2.447968 |
| H | -0.563107 | 0.802613  | 2.095957  |
| H | 1.475363  | -1.374176 | -2.003200 |
| S | -0.350299 | 2.953772  | 0.501195  |
| O | -1.779876 | 2.738969  | 0.734225  |
| O | 0.129508  | 4.312435  | 0.617530  |
| O | 0.470046  | 1.968122  | 1.270201  |
| O | -0.088133 | 2.588687  | -1.063556 |
| H | 1.934778  | 1.231658  | 0.446947  |
| H | -0.506964 | 1.713657  | -1.285226 |
| S | -3.574529 | -2.099995 | 1.012201  |
| O | -4.842454 | -2.400060 | 1.618914  |
| O | -2.420274 | -2.875327 | 1.514067  |

|   |           |           |           |
|---|-----------|-----------|-----------|
| O | -3.749662 | -2.513573 | -0.542901 |
| O | -3.236030 | -0.646313 | 0.985574  |
| H | -2.896856 | -2.329492 | -1.010107 |
| H | -3.226992 | 0.813356  | -0.467691 |
| C | -0.536192 | -0.843738 | 3.386195  |
| N | -1.241950 | 0.235651  | 2.649164  |
| C | -2.015076 | 1.150081  | 3.530686  |
| H | -1.270085 | -1.462020 | 3.900423  |
| H | 0.151891  | -0.396221 | 4.103762  |
| H | 0.012957  | -1.457250 | 2.678883  |
| H | -1.907304 | -0.183886 | 1.956797  |
| H | -1.343852 | 1.586620  | 4.270403  |
| H | -2.803214 | 0.584650  | 4.026904  |
| H | -2.436864 | 1.935963  | 2.909727  |
| C | -4.549034 | 0.449253  | -1.994654 |
| N | -3.949364 | 1.344370  | -0.969874 |
| C | -4.919056 | 1.856760  | 0.032016  |
| H | -3.754590 | 0.133801  | -2.667499 |
| H | -5.315777 | 0.998470  | -2.541522 |
| H | -4.977166 | -0.423701 | -1.505737 |
| H | -3.478212 | 2.165619  | -1.458317 |
| H | -4.381372 | 2.516291  | 0.709754  |
| H | -5.335886 | 1.015033  | 0.581679  |
| H | -5.707058 | 2.407717  | -0.482061 |
| C | 3.261817  | 1.885596  | -1.012113 |
| N | 2.861356  | 0.945185  | 0.075923  |
| C | 3.844821  | 0.915657  | 1.198305  |
| H | 2.486028  | 1.883018  | -1.774773 |
| H | 4.213782  | 1.538612  | -1.411267 |
| H | 3.354141  | 2.878223  | -0.575095 |
| H | 2.778516  | -0.009051 | -0.316193 |
| H | 3.893243  | 1.919052  | 1.620671  |
| H | 4.805595  | 0.609690  | 0.787638  |
| H | 3.504184  | 0.189021  | 1.934189  |

#### 4SA8DMA

|   |           |           |           |
|---|-----------|-----------|-----------|
| C | -0.647328 | -5.233086 | -1.167148 |
| N | -0.361917 | -4.237482 | -0.137159 |
| C | -0.853324 | -4.642641 | 1.178329  |
| H | -0.060831 | -6.139329 | -0.980126 |
| H | -0.368243 | -4.841827 | -2.147025 |
| H | -1.709832 | -5.524093 | -1.213565 |
| H | -0.814385 | -3.364611 | -0.396148 |
| H | -0.302049 | -5.524373 | 1.525081  |
| H | -1.924894 | -4.907499 | 1.180482  |

|   |           |           |           |
|---|-----------|-----------|-----------|
| H | -0.693227 | -3.834580 | 1.893610  |
| C | -4.110940 | 2.773601  | 2.989567  |
| N | -4.087551 | 1.342643  | 3.317765  |
| C | -4.682268 | 1.044890  | 4.623196  |
| H | -5.147555 | 3.114864  | 2.906446  |
| H | -3.616015 | 2.940029  | 2.030967  |
| H | -3.616477 | 3.388647  | 3.756159  |
| H | -3.121910 | 1.010159  | 3.316962  |
| H | -5.754410 | 1.263358  | 4.603641  |
| H | -4.233570 | 1.631834  | 5.438260  |
| H | -4.548513 | -0.014051 | 4.852678  |
| C | 3.835434  | 4.676276  | -2.197686 |
| N | 3.551263  | 4.253768  | -0.822864 |
| C | 4.238752  | 5.083405  | 0.172349  |
| H | 3.428232  | 5.676580  | -2.375631 |
| H | 3.362732  | 3.983399  | -2.896942 |
| H | 4.912201  | 4.706843  | -2.419289 |
| H | 3.871662  | 3.288801  | -0.706901 |
| H | 3.838860  | 6.102318  | 0.154959  |
| H | 5.322816  | 5.143767  | -0.002345 |
| H | 4.078333  | 4.664706  | 1.167546  |
| C | 7.163057  | -1.426383 | 0.572704  |
| N | 6.033493  | -2.274683 | 0.201611  |
| C | 6.393323  | -3.275760 | -0.796245 |
| H | 7.912700  | -2.017642 | 1.109477  |
| H | 6.820615  | -0.627869 | 1.233865  |
| H | 7.662827  | -0.957836 | -0.292058 |
| H | 5.284686  | -1.687621 | -0.158765 |
| H | 7.101289  | -3.992506 | -0.366854 |
| H | 6.861143  | -2.852273 | -1.702395 |
| H | 5.503589  | -3.831662 | -1.103745 |
| S | -3.048599 | -1.674300 | -2.660176 |
| O | -1.780675 | -2.057548 | -2.035610 |
| O | -2.971488 | -0.388652 | -3.376387 |
| O | -3.183785 | -2.804170 | -3.840687 |
| O | -4.225462 | -1.812547 | -1.816312 |
| H | -4.025321 | -2.644465 | -4.289440 |
| H | -3.798049 | 0.049888  | 0.473567  |
| C | -5.857547 | 0.017464  | 0.306007  |
| N | -4.604514 | -0.258794 | 1.053557  |
| C | -4.413316 | -1.686467 | 1.429487  |
| H | -5.892782 | 1.079672  | 0.065370  |
| H | -6.714068 | -0.250321 | 0.926029  |
| H | -5.849688 | -0.565622 | -0.612821 |

|   |           |           |           |
|---|-----------|-----------|-----------|
| H | -4.541796 | 0.347048  | 1.930241  |
| H | -3.487742 | -1.759395 | 1.998587  |
| H | -4.353231 | -2.279535 | 0.519106  |
| H | -5.256217 | -2.007810 | 2.043311  |
| S | 3.150266  | 0.661663  | -0.031369 |
| O | 4.357936  | 1.425275  | -0.296939 |
| O | 3.326307  | -0.797364 | -0.227394 |
| O | 2.879867  | 0.866398  | 1.538303  |
| O | 1.949377  | 1.155195  | -0.731925 |
| H | 1.909394  | 0.750825  | 1.777292  |
| H | 0.925300  | -0.021695 | -1.658980 |
| S | -0.374635 | -0.562199 | 2.407815  |
| O | -0.622376 | -0.986452 | 0.866915  |
| O | 0.410707  | 0.687191  | 2.361443  |
| O | -1.682969 | -0.392417 | 3.024344  |
| O | 0.392663  | -1.702182 | 2.926379  |
| H | 0.389437  | 3.078151  | -0.789551 |
| H | 1.888222  | -2.173469 | 2.308098  |
| S | -2.224923 | 2.010239  | -0.983420 |
| O | -0.912805 | 2.073322  | -1.647509 |
| O | -2.560440 | 3.193155  | -0.211344 |
| O | -3.342181 | 1.927618  | -2.115929 |
| O | -2.357605 | 0.737756  | -0.216950 |
| H | -3.237038 | 1.068091  | -2.613714 |
| H | -1.193844 | -0.300966 | 0.432780  |
| C | 0.062720  | 5.096440  | -0.996380 |
| N | 0.746224  | 3.945975  | -0.349308 |
| C | 0.500749  | 3.865043  | 1.117469  |
| H | 0.277569  | 5.076806  | -2.063971 |
| H | 0.434267  | 6.024931  | -0.561508 |
| H | -1.009784 | 4.998784  | -0.838047 |
| H | 1.792618  | 4.009733  | -0.532039 |
| H | -0.572884 | 3.811101  | 1.286326  |
| H | 0.919843  | 4.751023  | 1.595734  |
| H | 0.971102  | 2.965456  | 1.504207  |
| C | 0.543917  | 0.146403  | -3.681128 |
| N | 0.555455  | -0.633948 | -2.413882 |
| C | 1.361582  | -1.884012 | -2.483321 |
| H | -0.053863 | 1.038609  | -3.516352 |
| H | 0.101093  | -0.464036 | -4.466772 |
| H | 1.569122  | 0.412606  | -3.937578 |
| H | -0.415593 | -0.918510 | -2.180883 |
| H | 1.206572  | -2.445388 | -1.564380 |
| H | 2.412915  | -1.625308 | -2.583861 |

|   |          |           |           |
|---|----------|-----------|-----------|
| H | 1.016120 | -2.470790 | -3.333564 |
| C | 3.882602 | -2.190124 | 2.924806  |
| N | 2.817308 | -2.466524 | 1.923425  |
| C | 2.745769 | -3.884708 | 1.480602  |
| H | 3.849058 | -1.129697 | 3.169052  |
| H | 4.842679 | -2.440203 | 2.472923  |
| H | 3.697049 | -2.786865 | 3.817867  |
| H | 2.990473 | -1.857859 | 1.094483  |
| H | 1.910552 | -3.994655 | 0.783963  |
| H | 2.579732 | -4.517995 | 2.352490  |
| H | 3.691279 | -4.147435 | 1.007237  |

5DMA

|   |           |           |           |
|---|-----------|-----------|-----------|
| C | -0.048810 | -3.860213 | 0.449811  |
| N | 0.016226  | -2.434984 | 0.753784  |
| C | -0.003348 | -2.169558 | 2.188053  |
| H | 0.856552  | -4.363080 | 0.806524  |
| H | -0.105584 | -4.004236 | -0.631866 |
| H | -0.913159 | -4.370987 | 0.909094  |
| H | -0.778376 | -1.955367 | 0.314686  |
| H | 0.905426  | -2.561725 | 2.657592  |
| H | -0.865372 | -2.621533 | 2.709249  |
| H | -0.030318 | -1.090878 | 2.359865  |
| C | 2.324152  | -1.080358 | -2.037174 |
| N | 2.373399  | -0.878215 | -0.593487 |
| C | 3.648889  | -1.289902 | -0.017574 |
| H | 3.045285  | -0.423294 | -2.535405 |
| H | 1.328541  | -0.827029 | -2.409330 |
| H | 2.551817  | -2.115429 | -2.346663 |
| H | 1.613698  | -1.410150 | -0.152765 |
| H | 4.453724  | -0.642540 | -0.382369 |
| H | 3.927235  | -2.330748 | -0.258937 |
| H | 3.610624  | -1.192990 | 1.070108  |
| C | -2.388390 | -1.049035 | -2.003120 |
| N | -2.378937 | -0.894625 | -0.552568 |
| C | -3.673553 | -1.197990 | 0.047705  |
| H | -2.540251 | -2.100508 | -2.270128 |
| H | -1.424291 | -0.737035 | -2.411803 |
| H | -3.178592 | -0.463424 | -2.504606 |
| H | -2.113208 | 0.068968  | -0.318142 |
| H | -3.910397 | -2.259344 | -0.083501 |
| H | -4.507460 | -0.617638 | -0.384352 |
| H | -3.638895 | -0.994569 | 1.120677  |
| C | 2.125739  | 2.982178  | -0.784057 |
| N | 1.576881  | 2.054499  | 0.199730  |



|     |           |           |           |
|-----|-----------|-----------|-----------|
| C   | 2.082360  | 2.312676  | 1.544098  |
| H   | 1.775794  | 3.999720  | -0.579170 |
| H   | 1.781438  | 2.705867  | -1.783597 |
| H   | 3.229312  | 3.008849  | -0.797459 |
| H   | 1.822408  | 1.094851  | -0.070364 |
| H   | 1.727359  | 3.285660  | 1.900666  |
| H   | 3.184519  | 2.319786  | 1.607231  |
| H   | 1.709223  | 1.549080  | 2.230918  |
| C   | -2.028205 | 2.999121  | -0.859013 |
| N   | -1.576548 | 2.058882  | 0.161568  |
| C   | -2.044739 | 2.422837  | 1.494902  |
| H   | -3.117877 | 2.951155  | -0.959540 |
| H   | -1.592331 | 2.732307  | -1.824754 |
| H   | -1.762163 | 4.048214  | -0.641452 |
| H   | -0.550363 | 2.031004  | 0.162949  |
| H   | -3.136217 | 2.345534  | 1.545202  |
| H   | -1.772603 | 3.450270  | 1.793409  |
| H   | -1.627212 | 1.733803  | 2.233050  |
| 5SA |           |           |           |
| S   | -3.924222 | -1.496927 | -0.382422 |
| O   | -4.469972 | -2.795769 | -0.486693 |
| O   | -2.874223 | -1.226100 | 0.612601  |
| O   | -3.340376 | -1.076637 | -1.789929 |
| O   | -5.100686 | -0.487889 | -0.127848 |
| H   | -2.695363 | -0.343191 | -1.692337 |
| H   | -4.772749 | 0.442346  | -0.097958 |
| S   | 4.248896  | -0.982314 | -0.564014 |
| O   | 5.159297  | -1.940554 | -1.081888 |
| O   | 2.920292  | -0.856280 | -1.149786 |
| O   | 4.060133  | -1.149355 | 1.010111  |
| O   | 4.939908  | 0.420066  | -0.589956 |
| H   | 3.357422  | -1.810803 | 1.192089  |
| H   | 4.283631  | 1.141492  | -0.444069 |
| S   | 0.497125  | -1.969201 | 0.782678  |
| O   | 0.169106  | -0.647566 | 1.294652  |
| O   | 1.666989  | -2.622588 | 1.297399  |
| O   | -0.730705 | -2.897475 | 1.010453  |
| O   | 0.541913  | -1.916475 | -0.785457 |
| H   | -1.572752 | -2.383588 | 0.914201  |
| H   | 1.433567  | -1.557864 | -1.064766 |
| S   | -2.381235 | 2.053594  | 0.070036  |
| O   | -3.797107 | 1.951118  | -0.152860 |
| O   | -1.731993 | 3.328500  | 0.129068  |
| O   | -1.975351 | 1.306184  | 1.392740  |

|   |           |          |           |
|---|-----------|----------|-----------|
| O | -1.729418 | 1.162355 | -1.077129 |
| H | -2.244651 | 0.358575 | 1.338606  |
| H | -0.729370 | 1.277614 | -1.080347 |
| S | 1.639577  | 2.295379 | 0.035849  |
| O | 0.828726  | 1.576407 | -0.931659 |
| O | 3.042165  | 2.420252 | -0.215182 |
| O | 1.099379  | 3.757513 | 0.208646  |
| O | 1.393483  | 1.685846 | 1.456303  |
| H | 0.117339  | 3.750181 | 0.264140  |
| H | 0.968201  | 0.784311 | 1.407712  |

5SA1DMA

|   |           |           |           |
|---|-----------|-----------|-----------|
| S | 3.784419  | -1.552807 | -0.147410 |
| O | 5.141025  | -1.882191 | 0.099432  |
| O | 3.387257  | -0.917067 | -1.390364 |
| O | 2.939842  | -2.871045 | 0.060321  |
| O | 3.220952  | -0.659583 | 1.051789  |
| H | 2.003419  | -2.724133 | -0.222575 |
| H | 2.939736  | 0.238058  | 0.768575  |
| S | -2.737091 | 2.119967  | -0.710338 |
| O | -3.387543 | 3.353596  | -0.957120 |
| O | -1.597031 | 2.065159  | 0.207347  |
| O | -3.794745 | 1.084314  | -0.170153 |
| O | -2.294724 | 1.539053  | -2.104087 |
| H | -3.347810 | 0.324722  | 0.280866  |
| H | -1.882447 | 0.640419  | -2.046056 |
| S | 1.824033  | 2.998579  | 0.319965  |
| O | 2.851251  | 3.969641  | 0.401295  |
| O | 1.921500  | 1.780395  | 1.134994  |
| O | 0.463690  | 3.707766  | 0.671409  |
| O | 1.645638  | 2.541609  | -1.174573 |
| H | -0.323275 | 3.155140  | 0.420405  |
| H | 1.240503  | 1.635560  | -1.198686 |
| S | -2.822752 | -2.399212 | 0.662978  |
| O | -2.439412 | -0.999954 | 0.922435  |
| O | -3.891082 | -2.971340 | 1.393676  |
| O | -3.126265 | -2.519981 | -0.872151 |
| O | -1.537926 | -3.274310 | 0.889621  |
| H | -2.460309 | -2.006531 | -1.405708 |
| H | -0.796819 | -2.961046 | 0.297383  |
| S | 0.151687  | -1.065817 | -1.514318 |
| O | 0.553293  | 0.147544  | -0.810296 |
| O | -1.224510 | -1.001803 | -2.034756 |
| O | 1.060069  | -1.225808 | -2.791024 |
| O | 0.362409  | -2.271533 | -0.669464 |

|   |           |           |           |
|---|-----------|-----------|-----------|
| H | 2.002187  | -1.142880 | -2.499036 |
| H | -0.896529 | -0.121502 | 1.667641  |
| C | -0.844112 | 1.168185  | 3.282370  |
| N | -0.183918 | 0.239380  | 2.317565  |
| C | 0.514515  | -0.912752 | 2.962493  |
| H | -1.353633 | 1.943327  | 2.715478  |
| H | -0.081863 | 1.607716  | 3.923425  |
| H | -1.561769 | 0.606125  | 3.878086  |
| H | 0.498625  | 0.773628  | 1.751282  |
| H | 1.013432  | -1.492630 | 2.191004  |
| H | -0.219933 | -1.522595 | 3.485715  |
| H | 1.257250  | -0.528686 | 3.659387  |

#### 5SA2DMA

|   |           |           |           |
|---|-----------|-----------|-----------|
| S | 4.953864  | 1.158465  | 0.634748  |
| O | 6.224498  | 1.708889  | 0.940407  |
| O | 4.284998  | 1.452660  | -0.624189 |
| O | 5.073289  | -0.403826 | 0.770099  |
| O | 3.953099  | 1.558935  | 1.804416  |
| H | 4.295517  | -0.867144 | 0.360462  |
| H | 3.032855  | 1.646250  | 1.445910  |
| S | -5.539085 | -0.229969 | 0.586328  |
| O | -4.974903 | 0.586625  | -0.479953 |
| O | -6.846411 | 0.036901  | 1.068973  |
| O | -5.490618 | -1.736791 | 0.133956  |
| O | -4.540318 | -0.163549 | 1.812372  |
| H | -4.575656 | -1.979455 | -0.166651 |
| H | -3.601129 | -0.228378 | 1.480483  |
| S | 2.665719  | -2.347580 | -1.373613 |
| O | 3.683835  | -3.164767 | -1.926971 |
| O | 2.876636  | -1.678777 | -0.085801 |
| O | 2.306243  | -1.233013 | -2.424554 |
| O | 1.368632  | -3.221072 | -1.248280 |
| H | 1.852347  | -0.466255 | -1.986811 |
| H | 0.646827  | -2.783908 | -0.718135 |
| S | 0.929229  | 1.862787  | -0.449083 |
| O | -0.285284 | 2.654421  | -0.442878 |
| O | 1.441075  | 1.527351  | 0.901594  |
| O | 0.793062  | 0.632192  | -1.273498 |
| O | 2.017163  | 2.768874  | -1.137088 |
| H | -0.624497 | -0.177261 | -1.466439 |
| H | 2.915566  | 2.356833  | -1.028713 |
| S | -1.783746 | -1.403537 | -0.151014 |
| O | -2.902187 | -2.281551 | -0.424859 |
| O | -1.474543 | -0.691873 | -1.544416 |

|   |           |           |           |
|---|-----------|-----------|-----------|
| O | -2.083873 | -0.324544 | 0.817738  |
| O | -0.532249 | -2.092191 | 0.250514  |
| H | -3.512657 | 1.550428  | -0.741339 |
| H | 0.216739  | -1.363922 | 1.735229  |
| C | -0.163602 | -0.194439 | 3.422236  |
| N | 0.753007  | -0.769975 | 2.397032  |
| C | 1.898215  | -1.542240 | 2.962261  |
| H | -0.950908 | 0.348519  | 2.906636  |
| H | 0.404387  | 0.474286  | 4.067582  |
| H | -0.594325 | -1.004394 | 4.009456  |
| H | 1.101931  | 0.007928  | 1.806250  |
| H | 1.508294  | -2.330225 | 3.605453  |
| H | 2.530815  | -0.867464 | 3.537586  |
| H | 2.462018  | -1.969514 | 2.137195  |
| C | -3.013648 | 2.176953  | -2.639102 |
| N | -2.953513 | 2.317499  | -1.155732 |
| C | -3.483958 | 3.611336  | -0.642592 |
| H | -4.050841 | 2.266048  | -2.957681 |
| H | -2.630229 | 1.193598  | -2.902597 |
| H | -2.404789 | 2.956515  | -3.094767 |
| H | -1.969317 | 2.226718  | -0.846201 |
| H | -4.531688 | 3.700751  | -0.924178 |
| H | -2.900648 | 4.427765  | -1.065163 |
| H | -3.391972 | 3.618147  | 0.442014  |

#### 5SA3DMA

|   |           |           |           |
|---|-----------|-----------|-----------|
| S | -6.199232 | -0.969685 | -0.675339 |
| O | -4.972290 | -1.742280 | -0.542752 |
| O | -7.318254 | -1.525273 | -1.348866 |
| O | -6.674130 | -0.539938 | 0.765327  |
| O | -5.831831 | 0.398544  | -1.379161 |
| H | -5.939860 | -0.076241 | 1.246625  |
| H | -4.969943 | 0.737750  | -1.013706 |
| S | 6.444575  | -0.742664 | 0.083517  |
| O | 5.705220  | 0.498544  | 0.002801  |
| O | 7.864639  | -0.728993 | 0.104513  |
| O | 5.941807  | -1.553055 | 1.353417  |
| O | 5.984590  | -1.675213 | -1.126659 |
| H | 4.983491  | -1.747754 | 1.221557  |
| H | 5.030717  | -1.887838 | -0.997769 |
| S | -3.327956 | 0.982496  | 1.173188  |
| O | -4.605380 | 0.839814  | 1.843797  |
| O | -3.468374 | 1.072593  | -0.315895 |
| O | -2.767953 | 2.399932  | 1.643206  |
| O | -2.317601 | -0.020716 | 1.534463  |

|   |           |           |           |
|---|-----------|-----------|-----------|
| H | -1.910223 | 2.538360  | 1.166411  |
| H | -0.615036 | 0.290263  | 2.064695  |
| S | 2.306072  | -1.359713 | 0.187401  |
| O | 1.197973  | -2.135160 | 0.715196  |
| O | 3.588636  | -2.076351 | 0.108162  |
| O | 1.997026  | -1.027243 | -1.357067 |
| O | 2.444677  | -0.040965 | 0.856608  |
| H | 1.140162  | -0.519663 | -1.380997 |
| H | 2.485983  | 2.136947  | -1.257594 |
| S | -0.279097 | 1.804192  | -1.062241 |
| O | -0.286951 | 0.320226  | -1.153327 |
| O | 0.846427  | 2.400886  | -1.766604 |
| O | -1.566878 | 2.301384  | -1.851319 |
| O | -0.421089 | 2.258594  | 0.330884  |
| H | -2.358215 | 1.947032  | -1.373738 |
| H | -1.654586 | -0.947662 | -0.714583 |
| C | -1.980329 | -2.119660 | -2.378470 |
| N | -2.220382 | -1.778874 | -0.949668 |
| C | -1.919773 | -2.886685 | 0.003736  |
| H | -2.189413 | -1.240321 | -2.984576 |
| H | -2.641527 | -2.936612 | -2.663346 |
| H | -0.939051 | -2.411941 | -2.503632 |
| H | -3.214638 | -1.520389 | -0.827956 |
| H | -0.853528 | -3.102169 | -0.026038 |
| H | -2.511593 | -3.756198 | -0.278037 |
| H | -2.203765 | -2.548781 | 0.997146  |
| C | 4.073447  | 1.501654  | -2.414322 |
| N | 3.501409  | 1.959287  | -1.114373 |
| C | 4.149536  | 3.180155  | -0.561403 |
| H | 3.559703  | 0.587652  | -2.703851 |
| H | 5.133870  | 1.308252  | -2.279530 |
| H | 3.906011  | 2.278360  | -3.159360 |
| H | 3.572104  | 1.201894  | -0.419438 |
| H | 3.643918  | 3.452473  | 0.363687  |
| H | 4.053090  | 3.989447  | -1.283954 |
| H | 5.195315  | 2.957955  | -0.362570 |
| C | 0.367039  | 1.613676  | 3.322857  |
| N | 0.261829  | 0.305744  | 2.619293  |
| C | 0.255099  | -0.872582 | 3.530667  |
| H | 0.406137  | 2.399078  | 2.572797  |
| H | 1.273180  | 1.618634  | 3.927899  |
| H | -0.507996 | 1.748617  | 3.957219  |
| H | 1.050202  | 0.213446  | 1.944408  |
| H | -0.628861 | -0.823536 | 4.164871  |

|         |           |           |           |
|---------|-----------|-----------|-----------|
| H       | 1.158143  | -0.854565 | 4.140045  |
| H       | 0.244195  | -1.771582 | 2.919961  |
| 5SA4DMA |           |           |           |
| S       | 0.843927  | 3.297878  | -1.004262 |
| O       | 1.987374  | 2.838181  | -0.246788 |
| O       | 0.974466  | 4.332052  | -1.978299 |
| O       | 0.222164  | 2.019356  | -1.738108 |
| O       | -0.313885 | 3.724150  | -0.039748 |
| H       | 0.678400  | 1.184104  | -1.436259 |
| H       | -0.432683 | 3.061030  | 0.723599  |
| S       | -1.494896 | 0.872158  | 1.814284  |
| O       | -1.586174 | 0.327035  | 0.451897  |
| O       | -0.578561 | 2.053760  | 1.888950  |
| O       | -2.911699 | 1.509351  | 2.153320  |
| O       | -1.147292 | -0.105147 | 2.829360  |
| H       | -3.638663 | 1.030747  | 1.670574  |
| H       | 2.020868  | 0.542344  | 2.481065  |
| C       | 1.634271  | 0.620964  | 4.517182  |
| N       | 1.771628  | 1.272287  | 3.186767  |
| C       | 2.799444  | 2.344768  | 3.110360  |
| H       | 0.797126  | -0.071693 | 4.462015  |
| H       | 1.436226  | 1.381392  | 5.272600  |
| H       | 2.557266  | 0.087899  | 4.741300  |
| H       | 0.855029  | 1.641567  | 2.866145  |
| H       | 2.793850  | 2.748122  | 2.098530  |
| H       | 3.773451  | 1.912962  | 3.337663  |
| H       | 2.558851  | 3.128391  | 3.828861  |
| S       | 1.017619  | -1.630722 | -1.792810 |
| O       | 1.305993  | -2.663295 | -0.789536 |
| O       | 1.867585  | -1.687731 | -2.982463 |
| O       | -0.407586 | -1.477618 | -2.064359 |
| O       | 1.474807  | -0.217066 | -1.090821 |
| H       | -1.963922 | 0.963930  | -1.330564 |
| H       | 1.816409  | -0.354481 | -0.142737 |
| S       | -4.955130 | -0.837829 | 0.067373  |
| O       | -4.396496 | -1.887618 | 0.923969  |
| O       | -4.475050 | -0.893223 | -1.314309 |
| O       | -6.535780 | -1.167556 | -0.101514 |
| O       | -4.888093 | 0.499799  | 0.670957  |
| H       | -6.947746 | -1.079282 | 0.769773  |
| H       | -1.363408 | -2.019090 | -0.360884 |
| S       | 3.652149  | -1.400457 | 1.443656  |
| O       | 2.470743  | -0.488642 | 1.230795  |
| O       | 4.196910  | -1.277337 | 2.767478  |

|         |           |           |           |
|---------|-----------|-----------|-----------|
| O       | 3.037782  | -2.876704 | 1.347283  |
| O       | 4.599714  | -1.259272 | 0.329603  |
| H       | 2.477431  | -2.915214 | 0.537233  |
| H       | 4.362094  | -0.781533 | -1.254055 |
| C       | -3.331411 | 2.450361  | -1.735576 |
| N       | -2.718819 | 1.121545  | -2.015561 |
| C       | -2.214590 | 0.949136  | -3.405658 |
| H       | -3.726678 | 2.434200  | -0.722297 |
| H       | -4.142126 | 2.620368  | -2.443192 |
| H       | -2.569554 | 3.221413  | -1.833047 |
| H       | -3.418036 | 0.377068  | -1.803446 |
| H       | -1.485310 | 1.728538  | -3.614098 |
| H       | -3.057835 | 1.015383  | -4.092811 |
| H       | -1.737686 | -0.026539 | -3.474414 |
| C       | -2.127881 | -3.886003 | -0.753105 |
| N       | -1.871318 | -2.744615 | 0.165682  |
| C       | -1.113987 | -3.103867 | 1.399718  |
| H       | -2.689946 | -3.516593 | -1.608299 |
| H       | -2.710468 | -4.638872 | -0.223549 |
| H       | -1.174445 | -4.296289 | -1.079541 |
| H       | -2.787013 | -2.334636 | 0.445672  |
| H       | -0.997397 | -2.203396 | 1.999837  |
| H       | -0.142634 | -3.497284 | 1.111221  |
| H       | -1.686982 | -3.849944 | 1.949772  |
| C       | 4.369829  | 0.962132  | -2.384315 |
| N       | 4.311224  | -0.520946 | -2.268892 |
| C       | 5.388500  | -1.244078 | -2.992803 |
| H       | 3.578050  | 1.391911  | -1.773909 |
| H       | 4.236229  | 1.249220  | -3.427015 |
| H       | 5.338548  | 1.307273  | -2.024044 |
| H       | 3.388111  | -0.872014 | -2.604594 |
| H       | 6.355040  | -0.949026 | -2.586178 |
| H       | 5.338546  | -1.003064 | -4.054357 |
| H       | 5.242850  | -2.313541 | -2.850570 |
| 5SA5DMA |           |           |           |
| S       | -3.322520 | -3.466759 | -0.270327 |
| O       | -3.389350 | -2.738279 | -1.539162 |
| O       | -2.002182 | -3.987927 | 0.076085  |
| O       | -3.985765 | -2.763541 | 0.835433  |
| O       | -4.246904 | -4.771749 | -0.592087 |
| H       | -4.623868 | -1.210065 | 0.355662  |
| H       | -4.253332 | -5.322856 | 0.203127  |
| C       | -5.856056 | -0.620501 | -1.200161 |
| N       | -4.910068 | -0.312961 | -0.093052 |

|   |           |           |           |
|---|-----------|-----------|-----------|
| C | -5.441054 | 0.637254  | 0.924814  |
| H | -5.376926 | -1.335417 | -1.865170 |
| H | -6.090086 | 0.300165  | -1.733462 |
| H | -6.766036 | -1.050993 | -0.782628 |
| H | -4.032187 | 0.067331  | -0.508077 |
| H | -4.653035 | 0.882696  | 1.634495  |
| H | -6.292968 | 0.177904  | 1.425896  |
| H | -5.748131 | 1.554494  | 0.424155  |
| S | 3.213279  | -1.704513 | 1.725831  |
| O | 3.708036  | -2.326256 | 2.923627  |
| O | 3.721348  | -2.300793 | 0.460406  |
| O | 1.735336  | -1.564136 | 1.647413  |
| O | 3.790549  | -0.200748 | 1.759279  |
| H | 5.196777  | 0.101618  | -0.868564 |
| H | 3.281097  | 0.399798  | 1.140043  |
| C | 6.108591  | -1.385681 | -1.978917 |
| N | 5.684354  | -0.810543 | -0.679552 |
| C | 6.781363  | -0.594300 | 0.297913  |
| H | 5.234077  | -1.461482 | -2.623278 |
| H | 6.541563  | -2.373236 | -1.819006 |
| H | 6.842137  | -0.728009 | -2.444812 |
| H | 4.955084  | -1.429126 | -0.241578 |
| H | 6.344290  | -0.184010 | 1.206038  |
| H | 7.506931  | 0.103234  | -0.120532 |
| H | 7.262600  | -1.546866 | 0.519653  |
| S | -1.322660 | 0.051792  | -1.499871 |
| O | -2.628508 | 0.729063  | -1.275510 |
| O | -0.345071 | 0.946446  | -2.117286 |
| O | -0.853174 | -0.664541 | -0.318807 |
| O | -1.593010 | -1.049101 | -2.634377 |
| H | 0.631674  | -0.035411 | 1.716451  |
| H | -2.229853 | -1.718659 | -2.276020 |
| S | 2.996958  | 1.744562  | -1.168217 |
| O | 2.584334  | 3.053473  | -1.672069 |
| O | 4.430739  | 1.483281  | -1.322035 |
| O | 2.506469  | 1.493732  | 0.204311  |
| O | 2.329317  | 0.627415  | -2.103016 |
| H | 0.991694  | -2.505693 | 0.360468  |
| H | 1.340979  | 0.732676  | -2.102501 |
| S | -2.361473 | 3.231492  | 1.323340  |
| O | -2.429683 | 4.634729  | 1.649245  |
| O | -2.985538 | 2.289020  | 2.242176  |
| O | -3.140491 | 3.121779  | -0.102113 |
| O | -0.964872 | 2.774659  | 0.986482  |



|         |           |           |           |
|---------|-----------|-----------|-----------|
| H       | -2.879441 | 2.276186  | -0.538028 |
| H       | -0.195180 | 3.633397  | -0.205887 |
| C       | -1.028936 | -0.268499 | 2.907467  |
| N       | 0.031147  | 0.574654  | 2.289573  |
| C       | 0.885986  | 1.292288  | 3.271419  |
| H       | -1.724262 | 0.380669  | 3.435549  |
| H       | -0.558982 | -0.983076 | 3.581893  |
| H       | -1.546547 | -0.794407 | 2.108687  |
| H       | -0.407388 | 1.290000  | 1.669650  |
| H       | 1.399040  | 0.564362  | 3.898020  |
| H       | 0.256189  | 1.943342  | 3.875979  |
| H       | 1.613350  | 1.883284  | 2.719175  |
| C       | -0.606400 | 4.315092  | -2.127252 |
| N       | 0.247387  | 4.277939  | -0.908771 |
| C       | 0.438310  | 5.594642  | -0.247389 |
| H       | -0.678705 | 3.300881  | -2.516228 |
| H       | -0.146747 | 4.971636  | -2.866196 |
| H       | -1.596566 | 4.677336  | -1.854799 |
| H       | 1.167482  | 3.855061  | -1.155500 |
| H       | 1.131847  | 5.466756  | 0.582432  |
| H       | -0.521398 | 5.937677  | 0.137143  |
| H       | 0.848111  | 6.306927  | -0.963487 |
| C       | 1.128831  | -3.100388 | -1.630185 |
| N       | 0.665579  | -3.298555 | -0.230819 |
| C       | 1.157597  | -4.557431 | 0.390760  |
| H       | 0.666582  | -2.200549 | -2.025579 |
| H       | 0.828934  | -3.961128 | -2.227979 |
| H       | 2.211462  | -2.995117 | -1.616787 |
| H       | -0.369045 | -3.305042 | -0.194971 |
| H       | 2.245754  | -4.540227 | 0.395244  |
| H       | 0.780650  | -5.405836 | -0.178847 |
| H       | 0.784196  | -4.606199 | 1.411622  |
| 5SA6DMA |           |           |           |
| C       | 8.007470  | 1.660454  | -0.100352 |
| N       | 7.178775  | 0.989711  | -1.098926 |
| C       | 7.615798  | 1.274898  | -2.463146 |
| H       | 9.018713  | 1.240414  | -0.111876 |
| H       | 7.587461  | 1.501195  | 0.895571  |
| H       | 8.098196  | 2.748162  | -0.261002 |
| H       | 6.214171  | 1.292089  | -0.985377 |
| H       | 8.603077  | 0.834532  | -2.637767 |
| H       | 7.688976  | 2.352611  | -2.687170 |
| H       | 6.918152  | 0.829237  | -3.176380 |
| S       | -4.103941 | -2.865321 | -0.912927 |

|   |           |           |           |
|---|-----------|-----------|-----------|
| O | -4.011345 | -2.022098 | -2.100118 |
| O | -2.936589 | -3.706500 | -0.643517 |
| O | -4.584098 | -2.150532 | 0.279933  |
| O | -5.298341 | -3.899393 | -1.324494 |
| H | -5.005499 | -0.492438 | 0.095671  |
| H | -5.341963 | -4.575385 | -0.634159 |
| C | -5.791550 | 0.899527  | -1.240172 |
| N | -5.399457 | 0.473816  | 0.131667  |
| C | -6.515001 | 0.479057  | 1.112940  |
| H | -4.913628 | 0.830507  | -1.876577 |
| H | -6.152820 | 1.926998  | -1.202121 |
| H | -6.573960 | 0.235386  | -1.605848 |
| H | -4.652654 | 1.096967  | 0.508394  |
| H | -6.128295 | 0.161811  | 2.079374  |
| H | -7.289645 | -0.210773 | 0.779906  |
| H | -6.914922 | 1.488716  | 1.196050  |
| S | 2.216446  | -2.395694 | 2.009963  |
| O | 2.484003  | -3.199810 | 3.171617  |
| O | 2.774173  | -2.934216 | 0.740453  |
| O | 0.794915  | -2.019354 | 1.807456  |
| O | 2.999718  | -1.005758 | 2.271668  |
| H | 4.746573  | -0.643898 | -0.114900 |
| H | 2.625191  | -0.280111 | 1.702503  |
| C | 5.498282  | -2.072737 | -1.401286 |
| N | 5.043685  | -1.642185 | -0.054778 |
| C | 6.072743  | -1.780843 | 1.008850  |
| H | 4.687846  | -1.901032 | -2.108588 |
| H | 5.752839  | -3.132519 | -1.375665 |
| H | 6.364520  | -1.471199 | -1.673775 |
| H | 4.186122  | -2.176502 | 0.227332  |
| H | 5.640404  | -1.427499 | 1.943088  |
| H | 6.938456  | -1.182166 | 0.729846  |
| H | 6.347590  | -2.831197 | 1.106094  |
| S | -1.433189 | 0.235119  | -1.641256 |
| O | -2.643893 | 1.063661  | -1.500958 |
| O | -0.270765 | 1.002152  | -2.111679 |
| O | -1.158848 | -0.588615 | -0.463918 |
| O | -1.730514 | -0.772229 | -2.853491 |
| H | -0.142226 | -0.227624 | 1.622859  |
| H | -2.568473 | -1.260628 | -2.647287 |
| S | 2.803440  | 1.352131  | -0.423789 |
| O | 2.601255  | 2.743290  | -0.834947 |
| O | 4.218047  | 0.971164  | -0.331922 |
| O | 2.039957  | 1.014645  | 0.795064  |

|         |           |           |           |
|---------|-----------|-----------|-----------|
| O       | 2.259461  | 0.408923  | -1.590748 |
| H       | 0.152154  | -2.730872 | 0.290481  |
| H       | 1.295804  | 0.605828  | -1.774476 |
| S       | -2.884632 | 3.206785  | 1.170235  |
| O       | -3.164125 | 4.486360  | 1.761231  |
| O       | -3.734556 | 2.083320  | 1.603448  |
| O       | -3.158063 | 3.406961  | -0.408578 |
| O       | -1.442880 | 2.801735  | 1.244529  |
| H       | -2.909876 | 2.561912  | -0.872993 |
| H       | -0.379786 | 3.558917  | 0.139639  |
| C       | -1.896357 | -0.544706 | 2.643317  |
| N       | -0.736757 | 0.309956  | 2.266404  |
| C       | 0.082819  | 0.760313  | 3.422346  |
| H       | -2.582654 | 0.045249  | 3.248097  |
| H       | -1.522291 | -1.404977 | 3.195144  |
| H       | -2.387886 | -0.872818 | 1.730872  |
| H       | -1.071411 | 1.153244  | 1.758271  |
| H       | 0.470964  | -0.113764 | 3.941379  |
| H       | -0.542933 | 1.356485  | 4.085437  |
| H       | 0.906097  | 1.359193  | 3.040588  |
| C       | -0.256638 | 4.334722  | -1.796061 |
| N       | 0.288224  | 4.133110  | -0.424193 |
| C       | 0.542413  | 5.388398  | 0.327936  |
| H       | -0.372244 | 3.355311  | -2.257147 |
| H       | 0.446711  | 4.938559  | -2.369305 |
| H       | -1.223192 | 4.830742  | -1.725182 |
| H       | 1.173043  | 3.581870  | -0.501945 |
| H       | 0.953916  | 5.132516  | 1.302918  |
| H       | -0.398017 | 5.921824  | 0.461558  |
| H       | 1.253887  | 6.002825  | -0.223167 |
| C       | 0.493976  | -3.239852 | -1.702119 |
| N       | -0.197088 | -3.426996 | -0.398439 |
| C       | -0.010767 | -4.781030 | 0.188174  |
| H       | 0.250783  | -2.252488 | -2.083273 |
| H       | 0.141174  | -3.999154 | -2.400001 |
| H       | 1.564516  | -3.332640 | -1.533850 |
| H       | -1.213340 | -3.262932 | -0.514885 |
| H       | 1.053819  | -4.953514 | 0.333643  |
| H       | -0.440375 | -5.521162 | -0.485515 |
| H       | -0.523962 | -4.814877 | 1.146973  |
| 5SA7DMA |           |           |           |
| C       | -3.949789 | 7.036914  | 1.231726  |
| N       | -3.797960 | 5.880421  | 0.355837  |
| C       | -4.717950 | 5.907912  | -0.776980 |

|   |           |           |           |
|---|-----------|-----------|-----------|
| H | -3.651287 | 7.948622  | 0.703017  |
| H | -3.300090 | 6.927389  | 2.103558  |
| H | -4.982346 | 7.186108  | 1.591941  |
| H | -3.958909 | 5.027054  | 0.886533  |
| H | -4.449027 | 6.721085  | -1.460000 |
| H | -5.771828 | 6.055241  | -0.483953 |
| H | -4.650509 | 4.964587  | -1.323028 |
| C | 7.485439  | 3.346980  | -0.290141 |
| N | 6.913212  | 2.366271  | -1.209058 |
| C | 7.278238  | 2.630567  | -2.598465 |
| H | 8.575604  | 3.245792  | -0.267877 |
| H | 7.109794  | 3.169682  | 0.720399  |
| H | 7.254683  | 4.391574  | -0.559755 |
| H | 5.899895  | 2.380782  | -1.120249 |
| H | 8.354823  | 2.484195  | -2.735048 |
| H | 7.037638  | 3.654529  | -2.931094 |
| H | 6.757478  | 1.931580  | -3.257394 |
| S | -2.867854 | -4.301111 | -0.858850 |
| O | -3.065222 | -3.523386 | -2.090019 |
| O | -1.499548 | -4.790174 | -0.692792 |
| O | -3.443332 | -3.677114 | 0.331706  |
| O | -3.802092 | -5.627656 | -1.029745 |
| H | -4.365986 | -2.246145 | 0.099969  |
| H | -3.504344 | -6.088669 | -1.826324 |
| C | -5.572945 | -1.181779 | -1.226384 |
| N | -5.031760 | -1.442989 | 0.135568  |
| C | -6.067344 | -1.751817 | 1.155291  |
| H | -4.733663 | -0.989477 | -1.889172 |
| H | -6.230379 | -0.313481 | -1.185138 |
| H | -6.125038 | -2.059006 | -1.561945 |
| H | -4.493694 | -0.617555 | 0.476147  |
| H | -5.573566 | -1.925436 | 2.109287  |
| H | -6.612005 | -2.646267 | 0.855075  |
| H | -6.745997 | -0.904750 | 1.245507  |
| S | 3.014738  | -2.035552 | 2.145340  |
| O | 3.436514  | -2.659219 | 3.370193  |
| O | 3.745724  | -2.489472 | 0.931686  |
| O | 1.553277  | -2.059986 | 1.886183  |
| O | 3.395338  | -0.472938 | 2.314798  |
| H | 5.034053  | 0.180237  | -0.067680 |
| H | 2.857890  | 0.083663  | 1.686328  |
| C | 6.260267  | -1.067874 | -1.165843 |
| N | 5.613305  | -0.669138 | 0.109965  |
| C | 6.569556  | -0.382983 | 1.211644  |

|   |           |           |           |
|---|-----------|-----------|-----------|
| H | 5.482630  | -1.228974 | -1.911485 |
| H | 6.824776  | -1.987913 | -1.012909 |
| H | 6.914981  | -0.256014 | -1.480212 |
| H | 4.937808  | -1.408692 | 0.421468  |
| H | 5.994532  | -0.094605 | 2.089336  |
| H | 7.227844  | 0.424141  | 0.894023  |
| H | 7.144837  | -1.283022 | 1.429128  |
| S | -1.224049 | -0.591922 | -1.688293 |
| O | -2.612726 | -0.109598 | -1.566178 |
| O | -0.308224 | 0.441034  | -2.192096 |
| O | -0.741900 | -1.269939 | -0.484860 |
| O | -1.239976 | -1.682289 | -2.861579 |
| H | 0.174861  | -0.538288 | 1.572450  |
| H | -1.904987 | -2.381455 | -2.626988 |
| S | 2.599662  | 1.560873  | -0.544664 |
| O | 2.058356  | 2.849055  | -0.979064 |
| O | 4.065649  | 1.537608  | -0.466237 |
| O | 1.957695  | 1.076953  | 0.696298  |
| O | 2.286891  | 0.487440  | -1.681305 |
| H | 1.148246  | -2.963565 | 0.413250  |
| H | 1.303367  | 0.455895  | -1.865447 |
| S | -3.414973 | 1.951500  | 1.054746  |
| O | -4.111286 | 3.076564  | 1.630164  |
| O | -3.866358 | 0.625773  | 1.509991  |
| O | -3.736877 | 2.034661  | -0.522366 |
| O | -1.926687 | 2.041225  | 1.144555  |
| H | -3.261439 | 1.284295  | -0.974561 |
| H | -1.069947 | 3.080482  | 0.006291  |
| C | -1.412319 | -1.290272 | 2.640924  |
| N | -0.539483 | -0.163081 | 2.208458  |
| C | 0.132799  | 0.544012  | 3.331336  |
| H | -2.226827 | -0.889017 | 3.240876  |
| H | -0.805702 | -1.990271 | 3.211880  |
| H | -1.805452 | -1.776569 | 1.751768  |
| H | -1.097344 | 0.533287  | 1.678233  |
| H | 0.747262  | -0.168312 | 3.877793  |
| H | -0.628833 | 0.975273  | 3.979620  |
| H | 0.759593  | 1.326695  | 2.911118  |
| C | -1.083424 | 3.702507  | -1.981913 |
| N | -0.516672 | 3.717436  | -0.603740 |
| C | -0.486145 | 5.067768  | 0.024831  |
| H | -1.035175 | 2.682121  | -2.358150 |
| H | -0.484012 | 4.359428  | -2.611888 |
| H | -2.113809 | 4.049683  | -1.942965 |

|         |           |           |           |
|---------|-----------|-----------|-----------|
| H       | 0.451820  | 3.333829  | -0.649734 |
| H       | -0.066177 | 4.970389  | 1.025453  |
| H       | -1.506821 | 5.458433  | 0.077848  |
| H       | 0.150661  | 5.718554  | -0.574610 |
| C       | 1.671207  | -3.327687 | -1.569361 |
| N       | 1.021726  | -3.720349 | -0.290246 |
| C       | 1.557636  | -4.979148 | 0.293332  |
| H       | 1.189802  | -2.426369 | -1.936234 |
| H       | 1.544410  | -4.134049 | -2.291547 |
| H       | 2.724505  | -3.142249 | -1.372001 |
| H       | 0.005100  | -3.843444 | -0.442815 |
| H       | 2.620532  | -4.846949 | 0.485643  |
| H       | 1.381930  | -5.796467 | -0.404684 |
| H       | 1.033826  | -5.177177 | 1.226355  |
| 5SA8DMA |           |           |           |
| C       | 5.743465  | -5.974224 | 1.931579  |
| N       | 5.448705  | -4.935722 | 0.950477  |
| C       | 6.469878  | -4.835659 | -0.087487 |
| H       | 5.702744  | -6.960201 | 1.456221  |
| H       | 4.993824  | -5.954513 | 2.726485  |
| H       | 6.738554  | -5.872356 | 2.398061  |
| H       | 5.370929  | -4.035859 | 1.419346  |
| H       | 6.453042  | -5.730690 | -0.718928 |
| H       | 7.493559  | -4.729682 | 0.311264  |
| H       | 6.263824  | -3.968068 | -0.717920 |
| C       | -7.815219 | 2.632503  | 0.512943  |
| N       | -7.018732 | 1.737859  | 1.346214  |
| C       | -7.363952 | 1.840870  | 2.763779  |
| H       | -8.863904 | 2.317523  | 0.524993  |
| H       | -7.466400 | 2.587960  | -0.522415 |
| H       | -7.784536 | 3.686859  | 0.838595  |
| H       | -6.032595 | 1.959322  | 1.235373  |
| H       | -8.365014 | 1.430514  | 2.934866  |
| H       | -7.358667 | 2.878055  | 3.138320  |
| H       | -6.646440 | 1.270604  | 3.355140  |
| C       | -5.796595 | -5.315689 | -0.968849 |
| N       | -5.476759 | -4.126237 | -1.752526 |
| C       | -5.602073 | -4.356503 | -3.189078 |
| H       | -6.859681 | -5.556505 | -1.073553 |
| H       | -5.598303 | -5.126063 | 0.088837  |
| H       | -5.222851 | -6.209769 | -1.267461 |
| H       | -4.525332 | -3.832550 | -1.544412 |
| H       | -6.651222 | -4.533680 | -3.448374 |
| H       | -5.020077 | -5.221550 | -3.549998 |

|   |           |           |           |
|---|-----------|-----------|-----------|
| H | -5.264919 | -3.472171 | -3.734917 |
| S | 2.232772  | 4.645471  | -1.023068 |
| O | 2.770580  | 3.944029  | -2.197283 |
| O | 0.773863  | 4.727150  | -1.010519 |
| O | 2.834625  | 4.224213  | 0.241836  |
| O | 2.771000  | 6.180974  | -1.154142 |
| H | 4.132096  | 3.097277  | 0.153762  |
| H | 2.452363  | 6.526203  | -1.999718 |
| C | 5.686035  | 2.329788  | -1.008231 |
| N | 4.980990  | 2.505682  | 0.291048  |
| C | 5.807326  | 3.133113  | 1.354468  |
| H | 4.985816  | 1.889356  | -1.712849 |
| H | 6.540763  | 1.669978  | -0.860154 |
| H | 6.017287  | 3.303986  | -1.365995 |
| H | 4.649280  | 1.585097  | 0.651905  |
| H | 5.206251  | 3.214549  | 2.257900  |
| H | 6.118282  | 4.125312  | 1.029452  |
| H | 6.676985  | 2.507225  | 1.550493  |
| S | -3.144520 | 1.231409  | 1.822946  |
| O | -3.771223 | 1.730239  | 3.019892  |
| O | -3.944851 | 1.436706  | 0.584820  |
| O | -1.744427 | 1.666223  | 1.600466  |
| O | -3.068629 | -0.368459 | 2.027813  |
| H | -4.465375 | -1.512046 | -0.355556 |
| H | -2.396913 | -0.764185 | 1.404407  |
| C | -6.133285 | -0.753322 | -1.326006 |
| N | -5.291561 | -0.928709 | -0.113287 |
| C | -6.018720 | -1.550622 | 1.027744  |
| H | -5.534941 | -0.267882 | -2.096473 |
| H | -6.988506 | -0.131135 | -1.066556 |
| H | -6.441748 | -1.742522 | -1.663981 |
| H | -4.903290 | -0.010079 | 0.183599  |
| H | -5.314796 | -1.671201 | 1.848654  |
| H | -6.404531 | -2.516119 | 0.703909  |
| H | -6.821557 | -0.874301 | 1.318340  |
| S | 1.672875  | 0.670923  | -1.809901 |
| O | 3.109578  | 0.551873  | -1.495937 |
| O | 1.102358  | -0.579873 | -2.330861 |
| O | 0.895996  | 1.259168  | -0.717483 |
| O | 1.575177  | 1.674263  | -3.050336 |
| H | 0.052446  | 0.428287  | 1.336312  |
| H | 2.007997  | 2.530382  | -2.793001 |
| S | -1.642521 | -2.182455 | -0.767437 |
| O | -0.803946 | -3.355599 | -1.020701 |

|      |           |           |           |
|------|-----------|-----------|-----------|
| O    | -3.079632 | -2.471477 | -0.797053 |
| O    | -1.232676 | -1.463537 | 0.459839  |
| O    | -1.447992 | -1.174345 | -1.986158 |
| H    | -1.508264 | 2.481468  | 0.080100  |
| H    | -0.477564 | -0.959532 | -2.111784 |
| S    | 4.150293  | -1.136448 | 1.289221  |
| O    | 5.033632  | -2.041044 | 1.983588  |
| O    | 4.233972  | 0.274910  | 1.703395  |
| O    | 4.624702  | -1.199103 | -0.248543 |
| O    | 2.721662  | -1.572809 | 1.266487  |
| H    | 4.022249  | -0.610324 | -0.782168 |
| H    | 2.220267  | -2.819144 | 0.138615  |
| C    | 1.295263  | 1.650495  | 2.437995  |
| N    | 0.784200  | 0.306767  | 2.045398  |
| C    | 0.242808  | -0.486576 | 3.181548  |
| H    | 2.143429  | 1.514591  | 3.106354  |
| H    | 0.487442  | 2.191780  | 2.925942  |
| H    | 1.606320  | 2.175824  | 1.538589  |
| H    | 1.542921  | -0.248723 | 1.605769  |
| H    | -0.567732 | 0.070074  | 3.646393  |
| H    | 1.046594  | -0.667512 | 3.893857  |
| H    | -0.132573 | -1.428208 | 2.788949  |
| C    | 2.534649  | -3.549465 | -1.787729 |
| N    | 1.870817  | -3.600611 | -0.454812 |
| C    | 2.081172  | -4.880174 | 0.278488  |
| H    | 2.304480  | -2.589236 | -2.246116 |
| H    | 2.142885  | -4.358775 | -2.403623 |
| H    | 3.608350  | -3.662943 | -1.651620 |
| H    | 0.848938  | -3.444671 | -0.593467 |
| H    | 1.561111  | -4.817019 | 1.233766  |
| H    | 3.153459  | -5.026693 | 0.439757  |
| H    | 1.660149  | -5.694913 | -0.310803 |
| C    | -1.960992 | 2.406903  | -1.948861 |
| N    | -1.471253 | 3.123200  | -0.740648 |
| C    | -2.253132 | 4.341573  | -0.403455 |
| H    | -1.381544 | 1.496823  | -2.065936 |
| H    | -1.833073 | 3.049578  | -2.819426 |
| H    | -3.008929 | 2.158271  | -1.795945 |
| H    | -0.483700 | 3.401838  | -0.868534 |
| H    | -3.278067 | 4.046079  | -0.187057 |
| H    | -2.214966 | 5.033647  | -1.243329 |
| H    | -1.803767 | 4.808264  | 0.470488  |
| 6DMA |           |           |           |
| C    | -3.958989 | 0.052987  | 1.060281  |



|   |           |           |           |
|---|-----------|-----------|-----------|
| N | -3.050249 | -0.248847 | -0.041209 |
| C | -3.750651 | -0.783426 | -1.204718 |
| H | -4.635161 | 0.867426  | 0.778598  |
| H | -3.386075 | 0.380808  | 1.931018  |
| H | -4.584229 | -0.804648 | 1.364141  |
| H | -2.358401 | -0.937498 | 0.276530  |
| H | -4.406066 | -0.018451 | -1.635027 |
| H | -4.375955 | -1.664167 | -0.976897 |
| H | -3.025903 | -1.070727 | -1.970220 |
| C | 0.617268  | 2.229590  | 2.322755  |
| N | 1.059673  | 2.472966  | 0.953885  |
| C | 1.690743  | 3.779457  | 0.799611  |
| H | 1.481251  | 2.152584  | 2.991878  |
| H | 0.071564  | 1.284354  | 2.367991  |
| H | -0.039183 | 3.022796  | 2.721486  |
| H | 0.248073  | 2.412820  | 0.327901  |
| H | 2.625384  | 3.816221  | 1.369675  |
| H | 1.060523  | 4.617616  | 1.144798  |
| H | 1.935240  | 3.949423  | -0.251765 |
| C | -2.341395 | 3.476310  | -0.689791 |
| N | -1.462192 | 2.331171  | -0.900423 |
| C | -1.065692 | 2.182729  | -2.296481 |
| H | -1.802510 | 4.407745  | -0.894331 |
| H | -2.668181 | 3.502498  | 0.352486  |
| H | -3.240635 | 3.467803  | -1.330335 |
| H | -1.942718 | 1.476915  | -0.595259 |
| H | -0.451333 | 3.035029  | -2.606638 |
| H | -1.918747 | 2.119476  | -2.994329 |
| H | -0.463658 | 1.278322  | -2.412096 |
| C | -0.616855 | -2.227697 | 2.323105  |
| N | -1.059025 | -2.472670 | 0.954468  |
| C | -1.689378 | -3.779646 | 0.801429  |
| H | -1.480923 | -2.150492 | 2.992098  |
| H | -0.071653 | -1.282124 | 2.367449  |
| H | 0.039987  | -3.020157 | 2.722682  |
| H | -0.247505 | -2.412643 | 0.328359  |
| H | -2.624136 | -3.816298 | 1.371308  |
| H | -1.058800 | -4.617109 | 1.147647  |
| H | -1.933531 | -3.950847 | -0.249827 |
| C | 3.959251  | -0.054134 | 1.060325  |
| N | 3.050274  | 0.247921  | -0.040902 |
| C | 3.750497  | 0.782087  | -1.204711 |
| H | 4.635318  | -0.868561 | 0.778365  |
| H | 3.386528  | -0.382052 | 1.931152  |

|   |          |           |           |
|---|----------|-----------|-----------|
| H | 4.584578 | 0.803442  | 1.364172  |
| H | 2.358798 | 0.936904  | 0.276947  |
| H | 4.405666 | 0.016877  | -1.634976 |
| H | 4.376019 | 1.662767  | -0.977258 |
| H | 3.025619 | 1.069334  | -1.970107 |
| C | 2.340810 | -3.476160 | -0.691200 |
| N | 1.461508 | -2.330931 | -0.900858 |
| C | 1.064358 | -2.181842 | -2.296660 |
| H | 1.801857 | -4.407494 | -0.896018 |
| H | 2.668024 | -3.502904 | 0.350930  |
| H | 3.239777 | -3.467306 | -1.332118 |
| H | 1.942135 | -1.476799 | -0.595439 |
| H | 0.450092 | -3.034140 | -2.607016 |
| H | 1.917120 | -2.117995 | -2.994815 |
| H | 0.462017 | -1.277549 | -2.411542 |

6SA

|   |           |           |           |
|---|-----------|-----------|-----------|
| S | 5.315209  | -0.525451 | 1.373512  |
| O | 6.161037  | -1.267579 | 2.230659  |
| O | 4.617652  | -1.158115 | 0.259681  |
| O | 4.219602  | 0.186064  | 2.274792  |
| O | 6.154744  | 0.665934  | 0.773469  |
| H | 3.509007  | 0.560421  | 1.708493  |
| H | 5.618763  | 1.167037  | 0.119584  |
| S | -5.468310 | 0.435926  | 1.144699  |
| O | -6.404241 | 1.263678  | 1.807351  |
| O | -4.459478 | 0.997906  | 0.252153  |
| O | -4.698056 | -0.408837 | 2.245553  |
| O | -6.266514 | -0.643476 | 0.321769  |
| H | -3.891933 | -0.809660 | 1.858089  |
| H | -5.639618 | -1.210027 | -0.181172 |
| S | -2.745969 | -1.879479 | -0.675041 |
| O | -4.150383 | -2.157274 | -0.668490 |
| O | -2.170567 | -0.998662 | -1.665485 |
| O | -2.394231 | -1.279926 | 0.768409  |
| O | -2.030289 | -3.251361 | -0.690650 |
| H | -1.808087 | -0.481859 | 0.677901  |
| H | -1.047598 | -3.177140 | -0.861878 |
| S | -1.412790 | 2.197110  | -0.399592 |
| O | -0.417513 | 3.223568  | -0.531082 |
| O | -1.120479 | 1.060007  | 0.452867  |
| O | -2.699821 | 2.926461  | 0.070583  |
| O | -1.740998 | 1.673042  | -1.843226 |
| H | -3.450980 | 2.278676  | 0.208142  |
| H | -1.964598 | 0.708466  | -1.830586 |

|   |          |           |           |
|---|----------|-----------|-----------|
| S | 2.846616 | 1.893615  | -0.712169 |
| O | 4.268058 | 2.062748  | -0.761473 |
| O | 2.334220 | 1.059803  | 0.383348  |
| O | 2.213739 | 3.299627  | -0.672097 |
| O | 2.264704 | 1.336629  | -2.053109 |
| H | 1.214157 | 3.264065  | -0.617865 |
| H | 2.252770 | 0.339691  | -2.053165 |
| S | 1.548128 | -2.143819 | -0.800343 |
| O | 2.101463 | -1.304381 | -1.840281 |
| O | 0.574065 | -3.141320 | -1.141686 |
| O | 2.686258 | -2.877979 | -0.047273 |
| O | 0.844934 | -1.223859 | 0.278582  |
| H | 3.486621 | -2.283348 | 0.089674  |
| H | 1.292080 | -0.344321 | 0.350848  |

#### 6SA1DMA

|   |           |           |           |
|---|-----------|-----------|-----------|
| S | -5.786347 | -0.843401 | 1.071220  |
| O | -6.869744 | -1.193891 | 1.911850  |
| O | -5.886845 | -0.945403 | -0.373754 |
| O | -5.369957 | 0.646691  | 1.428092  |
| O | -4.525001 | -1.695015 | 1.528017  |
| H | -4.707236 | 0.964148  | 0.774461  |
| H | -3.820954 | -1.623652 | 0.842156  |
| S | 3.464040  | 1.911875  | -0.119885 |
| O | 4.877916  | 1.662264  | -0.096505 |
| O | 2.658981  | 1.582603  | 1.028177  |
| O | 3.286532  | 3.434278  | -0.464890 |
| O | 2.870958  | 1.188411  | -1.389252 |
| H | 2.359738  | 3.706970  | -0.268264 |
| H | 2.116021  | 0.599050  | -1.148011 |
| S | 4.588725  | -1.992274 | 0.598524  |
| O | 5.141994  | -3.187674 | 1.133845  |
| O | 3.343880  | -1.484896 | 1.148926  |
| O | 5.704943  | -0.892660 | 0.662474  |
| O | 4.404649  | -2.083624 | -0.978297 |
| H | 5.395455  | -0.011727 | 0.339143  |
| H | 3.505676  | -2.408790 | -1.204064 |
| S | -0.399095 | 2.825168  | 0.031763  |
| O | -0.483522 | 1.700431  | 0.934479  |
| O | 0.541346  | 3.879757  | 0.266940  |
| O | -0.097902 | 2.319623  | -1.428933 |
| O | -1.828998 | 3.478203  | -0.072054 |
| H | -0.704314 | 1.578975  | -1.696320 |
| H | -2.496859 | 2.755487  | -0.159441 |
| S | 0.668285  | -1.840419 | -1.524683 |

|         |           |           |           |
|---------|-----------|-----------|-----------|
| O       | 1.766171  | -2.729570 | -1.741897 |
| O       | 0.891561  | -0.594503 | -0.810930 |
| O       | 0.035539  | -1.518104 | -2.925446 |
| O       | -0.441197 | -2.651358 | -0.764349 |
| H       | -0.665163 | -0.822650 | -2.818422 |
| H       | -1.277856 | -2.112003 | -0.651413 |
| S       | -2.909539 | 0.025917  | -1.273568 |
| O       | -1.774637 | 0.350325  | -2.152893 |
| O       | -2.634179 | -1.167741 | -0.436523 |
| O       | -3.350012 | 1.167994  | -0.458854 |
| O       | -4.066720 | -0.348454 | -2.267746 |
| H       | 0.670057  | 0.437630  | 1.761767  |
| H       | -4.860640 | -0.603520 | -1.728570 |
| C       | 1.511536  | 0.454002  | 3.650457  |
| N       | 1.116066  | -0.244927 | 2.393325  |
| C       | 0.208675  | -1.406825 | 2.605418  |
| H       | 2.164348  | 1.281243  | 3.385967  |
| H       | 2.035581  | -0.250529 | 4.294644  |
| H       | 0.615009  | 0.822567  | 4.146884  |
| H       | 1.967325  | -0.562336 | 1.902356  |
| H       | 0.001741  | -1.865774 | 1.642555  |
| H       | -0.716969 | -1.058473 | 3.061694  |
| H       | 0.702173  | -2.126561 | 3.256605  |
| 6SA2DMA |           |           |           |
| S       | 1.380737  | -2.870578 | 1.353184  |
| O       | 2.176351  | -3.640868 | 2.245521  |
| O       | 1.936040  | -2.383308 | 0.108339  |
| O       | 0.070570  | -3.690688 | 1.074062  |
| O       | 0.763010  | -1.602880 | 2.105558  |
| H       | -0.483496 | -3.232858 | 0.391440  |
| H       | 1.247168  | -0.774449 | 1.839582  |
| S       | -4.644564 | -1.249449 | 0.449909  |
| O       | -3.858147 | -0.731068 | 1.551719  |
| O       | -6.055914 | -1.337746 | 0.570779  |
| O       | -4.235887 | -0.390062 | -0.852209 |
| O       | -4.108782 | -2.649561 | 0.005963  |
| H       | -3.960381 | 0.532129  | -0.584441 |
| H       | -3.127483 | -2.611327 | -0.171015 |
| S       | 5.274658  | 0.965829  | 0.327882  |
| O       | 4.482522  | 0.384128  | -0.740862 |
| O       | 6.673961  | 0.740454  | 0.393631  |
| O       | 5.047140  | 2.530290  | 0.310592  |
| O       | 4.648593  | 0.507891  | 1.708173  |
| H       | 4.080943  | 2.732769  | 0.264480  |

|         |           |           |           |
|---------|-----------|-----------|-----------|
| H       | 3.661035  | 0.544540  | 1.666681  |
| S       | -2.745296 | 2.972949  | -1.079016 |
| O       | -3.624336 | 3.913463  | -1.672079 |
| O       | -3.260037 | 1.976808  | -0.134257 |
| O       | -2.007587 | 2.183950  | -2.226834 |
| O       | -1.612296 | 3.776668  | -0.349300 |
| H       | -1.660563 | 1.311255  | -1.897246 |
| H       | -0.950541 | 3.180832  | 0.103127  |
| S       | -1.148702 | -1.477637 | -1.750245 |
| O       | -0.010168 | -1.912989 | -2.518447 |
| O       | -1.542449 | -2.383974 | -0.645928 |
| O       | -1.020736 | -0.081801 | -1.235900 |
| O       | -2.374879 | -1.444943 | -2.763394 |
| H       | 0.429846  | 0.578353  | -0.952067 |
| H       | -3.173002 | -1.133111 | -2.285610 |
| S       | 1.407106  | 1.745365  | 0.574587  |
| O       | 2.319891  | 2.852075  | 0.407620  |
| O       | 1.290700  | 1.075214  | -0.865513 |
| O       | 1.917235  | 0.703865  | 1.498632  |
| O       | 0.021381  | 2.125926  | 0.948205  |
| H       | 3.168882  | -0.731535 | -1.460875 |
| H       | -1.160969 | 1.290164  | 2.056147  |
| C       | -1.478318 | 0.123626  | 3.760177  |
| N       | -1.957911 | 1.001613  | 2.651522  |
| C       | -2.675170 | 2.227436  | 3.110182  |
| H       | -0.979033 | -0.742430 | 3.331210  |
| H       | -2.337342 | -0.190783 | 4.350606  |
| H       | -0.780237 | 0.685770  | 4.379138  |
| H       | -2.595908 | 0.450912  | 2.053657  |
| H       | -1.994951 | 2.832563  | 3.707694  |
| H       | -3.536394 | 1.928030  | 3.705336  |
| H       | -3.004331 | 2.777767  | 2.232756  |
| C       | 2.871035  | -0.366626 | -3.466342 |
| N       | 2.866101  | -1.273481 | -2.284103 |
| C       | 3.763932  | -2.457438 | -2.415604 |
| H       | 3.888431  | -0.017085 | -3.630547 |
| H       | 2.223901  | 0.480387  | -3.251687 |
| H       | 2.505104  | -0.912690 | -4.334275 |
| H       | 1.905264  | -1.594390 | -2.102646 |
| H       | 4.787179  | -2.104675 | -2.531065 |
| H       | 3.459601  | -3.037994 | -3.285562 |
| H       | 3.668628  | -3.051477 | -1.510602 |
| 6SA3DMA |           |           |           |
| S       | 2.794908  | 3.528602  | -0.613038 |

|   |           |           |           |
|---|-----------|-----------|-----------|
| O | 3.041134  | 4.916267  | -0.793260 |
| O | 3.894703  | 2.581232  | -0.543877 |
| O | 1.930186  | 3.370403  | 0.699110  |
| O | 1.821251  | 3.070174  | -1.765764 |
| H | 1.975183  | 2.439056  | 1.061518  |
| H | 1.809219  | 2.068420  | -1.855322 |
| S | -3.828446 | 0.592061  | 2.309532  |
| O | -3.602012 | 1.769563  | 1.496740  |
| O | -4.276052 | 0.753756  | 3.653102  |
| O | -4.815116 | -0.392422 | 1.597303  |
| O | -2.504364 | -0.296749 | 2.251141  |
| H | -4.499999 | -0.602548 | 0.670962  |
| H | -1.683144 | 0.262107  | 2.325904  |
| S | -3.724818 | -0.471977 | -2.003488 |
| O | -3.726130 | 0.975729  | -1.930164 |
| O | -3.794228 | -1.159427 | -0.694910 |
| O | -5.131441 | -0.926771 | -2.667645 |
| O | -2.667458 | -1.044887 | -2.847271 |
| H | -5.250859 | -0.424161 | -3.486023 |
| H | -1.189537 | -0.351837 | -3.111801 |
| S | 2.615050  | -3.601409 | 0.110446  |
| O | 3.765819  | -4.423524 | 0.273005  |
| O | 1.286758  | -4.079275 | 0.399432  |
| O | 2.848969  | -2.269390 | 0.975787  |
| O | 2.670282  | -3.030842 | -1.359098 |
| H | 2.012520  | -1.939262 | 1.436657  |
| H | 1.851057  | -2.470369 | -1.524878 |
| S | 0.458018  | -0.130774 | -1.778264 |
| O | 1.789658  | 0.451503  | -2.000030 |
| O | -0.263565 | 0.020234  | -3.177906 |
| O | 0.527093  | -1.581627 | -1.477004 |
| O | -0.339388 | 0.573775  | -0.776219 |
| H | -2.389407 | -2.182900 | -0.243844 |
| H | 3.679492  | -0.792357 | 0.134496  |
| S | 1.038244  | 0.280395  | 2.436261  |
| O | 0.829815  | -1.147528 | 2.155092  |
| O | 2.083386  | 0.884414  | 1.605564  |
| O | -0.211792 | 1.035316  | 2.507662  |
| O | 1.705291  | 0.369298  | 3.912559  |
| H | -1.250958 | 2.063960  | -0.595743 |
| H | 1.032719  | 0.125829  | 4.565205  |
| C | -1.403750 | 3.736938  | 0.641836  |
| N | -1.888981 | 2.872195  | -0.473606 |
| C | -2.009185 | 3.576336  | -1.781730 |

|   |           |           |           |
|---|-----------|-----------|-----------|
| H | -1.319404 | 3.126207  | 1.535639  |
| H | -2.124387 | 4.537520  | 0.800808  |
| H | -0.429160 | 4.139270  | 0.376880  |
| H | -2.784916 | 2.445455  | -0.202332 |
| H | -2.406189 | 2.873492  | -2.508944 |
| H | -1.020524 | 3.922907  | -2.079088 |
| H | -2.686080 | 4.422187  | -1.668549 |
| C | 5.385475  | 0.006366  | 0.958555  |
| N | 4.399181  | -0.113142 | -0.151638 |
| C | 4.981154  | -0.520760 | -1.462352 |
| H | 4.849507  | 0.310016  | 1.855222  |
| H | 6.123053  | 0.761355  | 0.692461  |
| H | 5.863858  | -0.959162 | 1.114964  |
| H | 3.937664  | 0.804126  | -0.270232 |
| H | 4.177245  | -0.540372 | -2.193938 |
| H | 5.425473  | -1.509749 | -1.364612 |
| H | 5.733667  | 0.211642  | -1.750567 |
| C | -1.708373 | -3.382453 | 1.319648  |
| N | -1.630683 | -2.871581 | -0.079830 |
| C | -1.733253 | -3.930566 | -1.125179 |
| H | -1.633646 | -2.536948 | 1.997358  |
| H | -0.886184 | -4.074633 | 1.480791  |
| H | -2.668720 | -3.880103 | 1.451161  |
| H | -0.746746 | -2.364328 | -0.237321 |
| H | -1.713355 | -3.446656 | -2.098893 |
| H | -2.675755 | -4.460361 | -0.993465 |
| H | -0.890391 | -4.609401 | -1.013594 |

#### 6SA4DMA

|   |           |           |           |
|---|-----------|-----------|-----------|
| S | -0.638695 | 3.941338  | -1.479308 |
| O | -0.799254 | 5.325287  | -1.780062 |
| O | -1.665677 | 2.991672  | -1.860791 |
| O | 0.739694  | 3.500914  | -2.121693 |
| O | -0.327849 | 3.740662  | 0.052935  |
| H | 0.810068  | 2.511721  | -2.198195 |
| H | -1.127740 | 3.343352  | 0.527356  |
| S | -2.800796 | -3.284117 | -2.229720 |
| O | -3.451820 | -2.130882 | -1.640396 |
| O | -3.555627 | -4.260094 | -2.939833 |
| O | -1.671487 | -2.789562 | -3.218827 |
| O | -1.968736 | -4.009146 | -1.097555 |
| H | -1.224082 | -1.976869 | -2.867857 |
| H | -2.025697 | -3.542796 | -0.216684 |
| S | -2.279270 | 2.181783  | 2.602804  |
| O | -0.921579 | 1.865113  | 3.007582  |

|   |           |           |           |
|---|-----------|-----------|-----------|
| O | -3.285407 | 1.154475  | 2.892458  |
| O | -2.647974 | 3.439261  | 3.561834  |
| O | -2.388883 | 2.676658  | 1.215505  |
| H | -3.588753 | 3.635395  | 3.448718  |
| H | -2.723669 | 1.501553  | -1.042912 |
| C | -4.554032 | 0.745762  | -0.402175 |
| N | -3.347402 | 0.717635  | -1.277708 |
| C | -3.646565 | 0.784062  | -2.737183 |
| H | -4.227225 | 0.742801  | 0.634207  |
| H | -5.149555 | -0.138645 | -0.619961 |
| H | -5.118149 | 1.653069  | -0.613823 |
| H | -2.836164 | -0.152847 | -1.081121 |
| H | -2.703803 | 0.733213  | -3.274784 |
| H | -4.145191 | 1.728466  | -2.947337 |
| H | -4.276971 | -0.062961 | -2.995847 |
| S | 4.355296  | -0.855361 | 0.658369  |
| O | 5.627630  | -1.361823 | 1.083118  |
| O | 4.309369  | 0.588750  | 0.335638  |
| O | 4.036380  | -1.625849 | -0.731325 |
| O | 3.207054  | -1.195651 | 1.549996  |
| H | 3.087366  | -1.489516 | -0.982903 |
| H | 2.059163  | 0.181953  | 1.995314  |
| S | 0.646332  | -0.167251 | -1.714762 |
| O | 0.337508  | 0.469874  | -0.291464 |
| O | 1.492251  | -1.346468 | -1.513300 |
| O | -0.642937 | -0.481176 | -2.329576 |
| O | 1.372878  | 0.927756  | -2.401068 |
| H | 0.801900  | -2.867507 | 1.954507  |
| H | 3.134575  | 1.058613  | -2.446312 |
| S | -1.547536 | -1.697589 | 1.796682  |
| O | -0.244453 | -1.542084 | 2.469907  |
| O | -1.752966 | -3.070571 | 1.337385  |
| O | -2.694145 | -1.434784 | 2.843329  |
| O | -1.716223 | -0.679830 | 0.730043  |
| H | -2.881172 | -0.455761 | 2.917562  |
| H | -0.450259 | -0.000130 | 0.138414  |
| C | 2.037326  | -4.308882 | 2.790352  |
| N | 1.629782  | -3.430132 | 1.664121  |
| C | 1.343788  | -4.151837 | 0.390872  |
| H | 2.223325  | -3.691232 | 3.667397  |
| H | 2.947356  | -4.843180 | 2.519679  |
| H | 1.236314  | -5.016581 | 3.000456  |
| H | 2.361162  | -2.700746 | 1.513236  |
| H | 0.504467  | -4.827197 | 0.543400  |



|         |           |           |           |
|---------|-----------|-----------|-----------|
| H       | 2.233796  | -4.706406 | 0.094415  |
| H       | 1.094120  | -3.421157 | -0.375394 |
| C       | 1.928838  | 0.653185  | 3.995428  |
| N       | 1.624982  | 0.929934  | 2.565340  |
| C       | 2.091768  | 2.262801  | 2.086619  |
| H       | 1.514230  | -0.321086 | 4.244867  |
| H       | 1.455109  | 1.419666  | 4.605847  |
| H       | 3.008354  | 0.655416  | 4.137361  |
| H       | 0.602887  | 0.887780  | 2.456468  |
| H       | 1.703257  | 2.418207  | 1.083272  |
| H       | 3.179616  | 2.267613  | 2.076892  |
| H       | 1.692666  | 3.027350  | 2.749979  |
| C       | 5.049167  | 0.549016  | -3.116860 |
| N       | 4.119588  | 1.331181  | -2.257673 |
| C       | 4.234413  | 2.808163  | -2.402323 |
| H       | 4.912598  | -0.507433 | -2.894826 |
| H       | 6.073867  | 0.838291  | -2.885700 |
| H       | 4.831605  | 0.752079  | -4.165063 |
| H       | 4.273226  | 1.063057  | -1.250770 |
| H       | 3.467019  | 3.282095  | -1.792927 |
| H       | 4.082261  | 3.082070  | -3.445912 |
| H       | 5.223981  | 3.123516  | -2.073726 |
| 6SA5DMA |           |           |           |
| S       | 3.981864  | -2.543169 | -1.389291 |
| O       | 4.207640  | -3.894095 | -1.787428 |
| O       | 5.076818  | -1.660548 | -1.068286 |
| O       | 3.086469  | -1.905253 | -2.522393 |
| O       | 2.998118  | -2.555654 | -0.142376 |
| H       | 2.834527  | -0.970137 | -2.308508 |
| H       | 3.272870  | -1.877196 | 0.560839  |
| S       | -3.816739 | -3.265971 | 0.185886  |
| O       | -3.710459 | -2.831050 | -1.207945 |
| O       | -2.553683 | -3.632557 | 0.822979  |
| O       | -4.640321 | -2.368106 | 1.008595  |
| O       | -4.665888 | -4.648434 | 0.038818  |
| H       | -5.208410 | -0.979394 | 0.135280  |
| H       | -4.781632 | -5.013856 | 0.927372  |
| C       | -6.195646 | -0.700651 | -1.665043 |
| N       | -5.400201 | -0.187546 | -0.516616 |
| C       | -6.028453 | 0.949439  | 0.215126  |
| H       | -5.655949 | -1.537395 | -2.103375 |
| H       | -6.321519 | 0.096768  | -2.396610 |
| H       | -7.169222 | -1.032309 | -1.304952 |
| H       | -4.459903 | 0.092074  | -0.865115 |

|   |           |           |           |
|---|-----------|-----------|-----------|
| H | -5.344487 | 1.300797  | 0.986563  |
| H | -6.968208 | 0.610855  | 0.651074  |
| H | -6.209405 | 1.763567  | -0.485102 |
| S | 2.438360  | -0.454753 | 2.550690  |
| O | 2.671029  | -0.636739 | 3.954509  |
| O | 3.591970  | -0.840929 | 1.670776  |
| O | 1.196872  | -1.052688 | 2.017843  |
| O | 2.291287  | 1.132476  | 2.354995  |
| H | 5.144830  | 1.019298  | -0.293495 |
| H | 2.252335  | 1.379703  | 1.390398  |
| C | 6.917373  | 0.257214  | 0.530612  |
| N | 5.558519  | 0.851775  | 0.648986  |
| C | 5.514316  | 2.133756  | 1.404960  |
| H | 6.836660  | -0.663928 | -0.039848 |
| H | 7.303325  | 0.053705  | 1.529354  |
| H | 7.569992  | 0.963902  | 0.018445  |
| H | 4.910231  | 0.173357  | 1.099402  |
| H | 4.487298  | 2.489552  | 1.418599  |
| H | 6.153447  | 2.861012  | 0.905506  |
| H | 5.862263  | 1.961959  | 2.422906  |
| S | -1.589064 | -0.110505 | -1.517442 |
| O | -2.901625 | 0.585885  | -1.467240 |
| O | -0.578802 | 0.691790  | -2.208627 |
| O | -1.176353 | -0.641483 | -0.223516 |
| O | -1.812126 | -1.368948 | -2.487943 |
| H | -0.271093 | 0.063872  | 2.235141  |
| H | -2.484597 | -1.961448 | -2.067637 |
| S | 2.734964  | 1.895652  | -1.455867 |
| O | 2.195072  | 2.901779  | -2.364418 |
| O | 4.155994  | 1.611095  | -1.607567 |
| O | 2.324453  | 2.151403  | -0.062498 |
| O | 2.041712  | 0.480917  | -1.868255 |
| H | 0.657973  | -2.362047 | 0.427229  |
| H | 1.050981  | 0.570861  | -1.980096 |
| S | -2.821995 | 3.307723  | 0.847849  |
| O | -2.837534 | 4.740708  | 1.016828  |
| O | -3.580819 | 2.508783  | 1.805697  |
| O | -3.497882 | 3.078393  | -0.617972 |
| O | -1.441475 | 2.737007  | 0.682016  |
| H | -3.206460 | 2.196041  | -0.949725 |
| H | -0.539975 | 3.445984  | -0.624234 |
| C | -2.242368 | -0.257247 | 2.781186  |
| N | -1.083887 | 0.640387  | 2.515466  |
| C | -0.717402 | 1.493580  | 3.679761  |

|         |           |           |           |
|---------|-----------|-----------|-----------|
| H       | -3.107495 | 0.361326  | 3.007018  |
| H       | -1.997755 | -0.904482 | 3.623372  |
| H       | -2.430084 | -0.854962 | 1.894587  |
| H       | -1.292098 | 1.273935  | 1.716066  |
| H       | -0.443706 | 0.854807  | 4.518854  |
| H       | -1.574946 | 2.115166  | 3.930714  |
| H       | 0.133040  | 2.110260  | 3.401320  |
| C       | -1.006117 | 4.099051  | -2.546859 |
| N       | -0.122451 | 4.076420  | -1.347269 |
| C       | 0.085081  | 5.403000  | -0.705726 |
| H       | -1.078832 | 3.080763  | -2.924874 |
| H       | -0.560162 | 4.747627  | -3.300629 |
| H       | -1.990849 | 4.459750  | -2.257040 |
| H       | 0.789845  | 3.670742  | -1.633691 |
| H       | 0.800634  | 5.279035  | 0.105625  |
| H       | -0.865580 | 5.748820  | -0.302203 |
| H       | 0.477257  | 6.103087  | -1.443111 |
| C       | 0.260938  | -3.791194 | -1.050532 |
| N       | 0.144400  | -3.246351 | 0.333539  |
| C       | 0.616189  | -4.184152 | 1.389530  |
| H       | -0.044265 | -3.019913 | -1.753762 |
| H       | -0.406326 | -4.648084 | -1.131418 |
| H       | 1.290688  | -4.085161 | -1.232827 |
| H       | -0.853654 | -3.038892 | 0.504148  |
| H       | 1.655128  | -4.436763 | 1.189074  |
| H       | -0.012417 | -5.072672 | 1.369223  |
| H       | 0.535605  | -3.683188 | 2.351387  |
| 6SA6DMA |           |           |           |
| S       | 4.317938  | 1.301240  | -2.282708 |
| O       | 4.332835  | 0.026511  | -2.977216 |
| O       | 3.091657  | 2.076185  | -2.385491 |
| O       | 4.803417  | 1.197149  | -0.876720 |
| O       | 5.510955  | 2.216330  | -2.937078 |
| H       | 5.131448  | -1.487940 | 0.511320  |
| H       | 5.287402  | 2.346684  | -3.869396 |
| C       | 7.146063  | -1.013724 | 0.435068  |
| N       | 5.835229  | -1.253222 | -0.218455 |
| C       | 5.855494  | -2.284397 | -1.291147 |
| H       | 7.016047  | -0.261530 | 1.211321  |
| H       | 7.858667  | -0.655797 | -0.307307 |
| H       | 7.506206  | -1.941223 | 0.879610  |
| H       | 5.479271  | -0.343853 | -0.598714 |
| H       | 4.861902  | -2.339002 | -1.724511 |
| H       | 6.135975  | -3.244466 | -0.858283 |

|   |           |           |           |
|---|-----------|-----------|-----------|
| H | 6.572684  | -1.986076 | -2.054463 |
| S | -3.799027 | -0.085251 | -2.482838 |
| O | -4.418770 | -0.690298 | -3.633690 |
| O | -2.714589 | -0.928616 | -1.887065 |
| O | -3.335468 | 1.303196  | -2.641409 |
| O | -4.961114 | -0.060151 | -1.365845 |
| H | -2.769325 | -4.001116 | -0.791349 |
| H | -4.604641 | 0.373141  | -0.548221 |
| C | -4.107095 | -4.016784 | -2.377968 |
| N | -3.557541 | -3.416902 | -1.132285 |
| C | -4.559793 | -3.221684 | -0.048004 |
| H | -3.283859 | -4.189536 | -3.069291 |
| H | -4.812895 | -3.318781 | -2.825558 |
| H | -4.592227 | -4.963480 | -2.140906 |
| H | -3.157205 | -2.478459 | -1.376773 |
| H | -4.080353 | -2.701772 | 0.779730  |
| H | -4.935662 | -4.193811 | 0.271483  |
| H | -5.370300 | -2.603451 | -0.430321 |
| S | -0.294444 | -4.053272 | 0.056240  |
| O | -1.305741 | -4.981244 | -0.436019 |
| O | -0.823548 | -2.719942 | 0.354610  |
| O | 0.167855  | -4.697364 | 1.474360  |
| O | 0.930439  | -3.999825 | -0.769353 |
| H | 0.916786  | -4.151949 | 1.794500  |
| H | 0.451872  | -0.426262 | -0.543966 |
| C | -0.059484 | 1.188634  | -1.764514 |
| N | -0.051363 | -0.265293 | -1.429230 |
| C | 0.556725  | -1.101411 | -2.504394 |
| H | -0.408635 | 1.748239  | -0.901671 |
| H | -0.750686 | 1.333904  | -2.592887 |
| H | 0.948451  | 1.496418  | -2.036455 |
| H | -1.033594 | -0.566405 | -1.295704 |
| H | 0.554248  | -2.139951 | -2.183118 |
| H | 1.576940  | -0.763565 | -2.682780 |
| H | -0.041913 | -0.983261 | -3.406166 |
| S | -0.551411 | 3.809185  | 1.564702  |
| O | -1.723816 | 3.668476  | 2.435212  |
| O | -0.928884 | 3.983751  | 0.148529  |
| O | 0.479544  | 4.708299  | 2.026862  |
| O | 0.206719  | 2.337118  | 1.611995  |
| H | 1.985186  | 2.241571  | 0.918346  |
| H | -0.474863 | 1.622645  | 1.492211  |
| S | 2.573686  | -1.627456 | 1.289173  |
| O | 1.881638  | -2.565662 | 2.201875  |

|         |           |           |           |
|---------|-----------|-----------|-----------|
| O       | 3.903446  | -1.229005 | 1.758013  |
| O       | 2.897406  | -2.446542 | -0.045542 |
| O       | 1.723443  | -0.485061 | 0.928601  |
| H       | 2.129477  | -3.044853 | -0.318123 |
| H       | -1.031186 | -1.082220 | 2.270069  |
| S       | -3.076171 | 0.541894  | 1.734099  |
| O       | -1.639557 | 0.434675  | 1.332961  |
| O       | -3.616363 | -0.725021 | 2.180023  |
| O       | -3.086929 | 1.469796  | 3.034838  |
| O       | -3.861810 | 1.239614  | 0.704619  |
| H       | -2.618570 | 2.326212  | 2.831853  |
| H       | -3.371637 | 2.658187  | -1.527193 |
| C       | 3.081924  | 3.907250  | 0.332227  |
| N       | 2.980082  | 2.517650  | 0.874236  |
| C       | 3.545629  | 2.356305  | 2.242164  |
| H       | 2.695493  | 3.895891  | -0.683884 |
| H       | 4.133450  | 4.191410  | 0.317565  |
| H       | 2.492464  | 4.570022  | 0.961436  |
| H       | 3.481956  | 1.882958  | 0.228490  |
| H       | 2.961226  | 2.963926  | 2.930796  |
| H       | 4.583912  | 2.686456  | 2.233046  |
| H       | 3.493034  | 1.302818  | 2.510611  |
| C       | -0.251973 | -0.445882 | 4.066612  |
| N       | -0.582977 | -1.522342 | 3.093650  |
| C       | -1.463755 | -2.590036 | 3.642539  |
| H       | 0.375608  | 0.288187  | 3.565908  |
| H       | 0.280051  | -0.882657 | 4.911298  |
| H       | -1.173140 | 0.030327  | 4.397646  |
| H       | 0.298411  | -1.938124 | 2.739969  |
| H       | -1.577942 | -3.355482 | 2.880259  |
| H       | -2.429343 | -2.151735 | 3.883263  |
| H       | -0.992062 | -3.014983 | 4.528808  |
| C       | -2.975153 | 4.482289  | -2.388296 |
| N       | -3.280011 | 3.643403  | -1.199954 |
| C       | -4.504107 | 4.057964  | -0.462442 |
| H       | -2.062768 | 4.110888  | -2.849878 |
| H       | -2.832284 | 5.514551  | -2.071004 |
| H       | -3.797621 | 4.409733  | -3.098430 |
| H       | -2.454804 | 3.685138  | -0.559064 |
| H       | -5.360694 | 3.999818  | -1.133906 |
| H       | -4.373846 | 5.079813  | -0.107059 |
| H       | -4.638148 | 3.378199  | 0.374791  |
| 6SA7DMA |           |           |           |
| C       | -8.681464 | -1.671082 | 0.328046  |

|   |           |           |           |
|---|-----------|-----------|-----------|
| N | -7.391543 | -2.347212 | 0.509106  |
| C | -7.518656 | -3.776657 | 0.814031  |
| H | -9.190894 | -2.092955 | -0.541366 |
| H | -8.509917 | -0.610316 | 0.138673  |
| H | -9.342406 | -1.774677 | 1.199244  |
| H | -6.861058 | -1.882006 | 1.241894  |
| H | -7.978053 | -4.287387 | -0.035309 |
| H | -8.131712 | -3.968559 | 1.705037  |
| H | -6.526656 | -4.204234 | 0.968449  |
| S | 5.605008  | 0.776858  | 0.198404  |
| O | 6.994218  | 1.054593  | 0.443157  |
| O | 5.101839  | -0.467742 | 0.887366  |
| O | 4.657697  | 1.871218  | 0.431173  |
| O | 5.534953  | 0.406605  | -1.375950 |
| H | 2.197713  | 0.738045  | 1.973131  |
| H | 4.644645  | 0.036855  | -1.589597 |
| C | 3.520654  | 1.320547  | 3.440077  |
| N | 2.960108  | 0.291467  | 2.526506  |
| C | 2.429865  | -0.906008 | 3.229538  |
| H | 3.923683  | 2.124400  | 2.829761  |
| H | 4.320432  | 0.875328  | 4.031848  |
| H | 2.728284  | 1.689980  | 4.089767  |
| H | 3.700302  | 0.003867  | 1.849755  |
| H | 2.129110  | -1.645439 | 2.490810  |
| H | 1.561247  | -0.611356 | 3.814802  |
| H | 3.212510  | -1.316089 | 3.868922  |
| S | -4.376680 | -1.196620 | -0.756907 |
| O | -3.413067 | -2.307115 | -0.739281 |
| O | -4.735464 | -0.728749 | 0.603350  |
| O | -3.932326 | -0.093645 | -1.624444 |
| O | -5.705477 | -1.733033 | -1.417102 |
| H | -3.139708 | 2.231052  | 0.328312  |
| H | -6.378323 | -2.026222 | -0.687060 |
| C | -4.215419 | 2.639481  | 2.034527  |
| N | -4.095675 | 2.050510  | 0.673321  |
| C | -5.094680 | 2.579896  | -0.295965 |
| H | -3.409446 | 2.257053  | 2.655901  |
| H | -5.188376 | 2.375646  | 2.448943  |
| H | -4.118287 | 3.720461  | 1.951132  |
| H | -4.202154 | 1.019064  | 0.723380  |
| H | -4.967918 | 2.042944  | -1.232343 |
| H | -4.911716 | 3.641883  | -0.434629 |
| H | -6.093354 | 2.399829  | 0.102532  |
| S | -0.413630 | 1.526784  | 1.781232  |

|   |           |           |           |
|---|-----------|-----------|-----------|
| O | 0.970337  | 1.888694  | 1.402267  |
| O | -0.473535 | 0.457473  | 2.769207  |
| O | -0.993715 | 2.811204  | 2.578395  |
| O | -1.292653 | 1.337251  | 0.620130  |
| H | -0.922486 | 3.605765  | 1.988918  |
| H | -0.800257 | -3.147727 | 1.057040  |
| C | -2.236247 | -4.602852 | 1.398557  |
| N | -1.816193 | -3.179229 | 1.301002  |
| C | -2.058693 | -2.378458 | 2.533074  |
| H | -2.011323 | -5.098673 | 0.457315  |
| H | -3.305600 | -4.642495 | 1.604611  |
| H | -1.674568 | -5.088325 | 2.194865  |
| H | -2.343170 | -2.745870 | 0.511310  |
| H | -1.623392 | -1.386371 | 2.412236  |
| H | -1.590916 | -2.882035 | 3.379304  |
| H | -3.133498 | -2.295371 | 2.690696  |
| S | 1.925205  | -0.562419 | -1.533144 |
| O | 0.860109  | -1.416763 | -2.128613 |
| O | 3.267594  | -1.005715 | -1.928001 |
| O | 1.681175  | 0.854833  | -1.729567 |
| O | 1.812670  | -0.803757 | 0.044968  |
| H | 1.988626  | 2.569958  | -0.396131 |
| H | 1.451094  | -1.721045 | 0.231530  |
| S | -1.344099 | 4.892293  | -0.447039 |
| O | -2.544596 | 4.088261  | -0.590086 |
| O | -0.309360 | 4.656651  | -1.465338 |
| O | -1.903302 | 6.403180  | -0.734164 |
| O | -0.782709 | 4.928933  | 0.913000  |
| H | -1.149175 | 7.005508  | -0.679334 |
| H | -0.642980 | -0.405261 | -2.352197 |
| S | 1.306726  | -4.361666 | -0.165370 |
| O | 0.871514  | -3.158495 | 0.639350  |
| O | 0.689372  | -5.578730 | 0.290657  |
| O | 0.695579  | -4.101753 | -1.624472 |
| O | 2.765159  | -4.377920 | -0.291994 |
| H | 0.834043  | -3.155446 | -1.879567 |
| H | 4.112726  | -3.294698 | -0.338050 |
| C | 2.619334  | 4.357942  | 0.447885  |
| N | 2.142192  | 3.540743  | -0.702461 |
| C | 3.068442  | 3.557910  | -1.868437 |
| H | 1.886182  | 4.273313  | 1.244524  |
| H | 2.701432  | 5.395218  | 0.123200  |
| H | 3.587965  | 3.974152  | 0.759766  |
| H | 1.206905  | 3.896050  | -0.989827 |

|         |           |           |           |
|---------|-----------|-----------|-----------|
| H       | 4.024582  | 3.149532  | -1.548814 |
| H       | 3.176598  | 4.586461  | -2.212499 |
| H       | 2.645597  | 2.933493  | -2.650202 |
| C       | -1.217250 | 1.560805  | -2.747975 |
| N       | -1.452340 | 0.087058  | -2.774542 |
| C       | -1.663545 | -0.480870 | -4.131116 |
| H       | -1.091988 | 1.863685  | -1.712753 |
| H       | -2.080694 | 2.062094  | -3.182903 |
| H       | -0.314672 | 1.785826  | -3.310644 |
| H       | -2.303615 | -0.109122 | -2.207266 |
| H       | -1.832403 | -1.552410 | -4.037175 |
| H       | -0.777011 | -0.299079 | -4.736908 |
| H       | -2.535689 | -0.009562 | -4.582127 |
| C       | 5.825809  | -3.675438 | 0.743562  |
| N       | 5.084732  | -2.927310 | -0.303550 |
| C       | 5.683322  | -3.034078 | -1.661635 |
| H       | 5.320711  | -3.531275 | 1.696677  |
| H       | 6.842101  | -3.288896 | 0.808033  |
| H       | 5.833100  | -4.735116 | 0.491831  |
| H       | 5.039665  | -1.924569 | -0.001472 |
| H       | 5.755208  | -4.087295 | -1.932576 |
| H       | 6.669982  | -2.572974 | -1.654161 |
| H       | 5.032605  | -2.511116 | -2.356815 |
| 6SA8DMA |           |           |           |
| C       | -5.024450 | -4.280294 | -2.666923 |
| N       | -6.064962 | -4.388142 | -1.631444 |
| C       | -5.818368 | -5.491385 | -0.689898 |
| H       | -4.077929 | -4.038250 | -2.181640 |
| H       | -5.280662 | -3.468653 | -3.350285 |
| H       | -4.905232 | -5.208342 | -3.241149 |
| H       | -6.967743 | -4.525110 | -2.077425 |
| H       | -4.895635 | -5.282379 | -0.146691 |
| H       | -5.719645 | -6.462421 | -1.192365 |
| H       | -6.637386 | -5.543989 | 0.029530  |
| C       | 9.179595  | -1.043568 | 0.661551  |
| N       | 8.105831  | -0.922341 | -0.319546 |
| C       | 8.614270  | -0.796178 | -1.683352 |
| H       | 9.716809  | -1.986983 | 0.514668  |
| H       | 8.759906  | -1.050607 | 1.670798  |
| H       | 9.921400  | -0.228288 | 0.606938  |
| H       | 7.554293  | -0.091554 | -0.110664 |
| H       | 9.082620  | -1.735100 | -1.999151 |
| H       | 9.363542  | 0.005212  | -1.799403 |
| H       | 7.786817  | -0.578810 | -2.362077 |



|   |           |           |           |
|---|-----------|-----------|-----------|
| S | 4.900905  | 1.272488  | -0.200146 |
| O | 6.304706  | 1.609665  | -0.117469 |
| O | 4.519169  | 0.094181  | 0.650476  |
| O | 3.957393  | 2.370063  | 0.016089  |
| O | 4.709377  | 0.752455  | -1.716429 |
| H | 1.673642  | 1.261025  | 1.897409  |
| H | 3.845063  | 0.277147  | -1.797137 |
| C | 3.089792  | 2.058139  | 3.159174  |
| N | 2.507731  | 0.911060  | 2.415222  |
| C | 2.123087  | -0.230658 | 3.286239  |
| H | 3.385533  | 2.811765  | 2.434112  |
| H | 3.965964  | 1.718042  | 3.711338  |
| H | 2.340567  | 2.454247  | 3.843250  |
| H | 3.195288  | 0.589221  | 1.700410  |
| H | 1.788827  | -1.055629 | 2.661069  |
| H | 1.307398  | 0.084774  | 3.933041  |
| H | 2.992087  | -0.536290 | 3.870059  |
| S | -4.793035 | -1.516341 | 0.018126  |
| O | -3.771628 | -2.585886 | 0.034561  |
| O | -4.865934 | -0.760197 | 1.272539  |
| O | -4.630138 | -0.638243 | -1.161544 |
| O | -6.194321 | -2.228238 | -0.115952 |
| H | -3.918082 | 2.378115  | 0.453201  |
| H | -6.134086 | -3.042466 | -0.754117 |
| C | -4.852224 | 2.699705  | 2.255506  |
| N | -4.749335 | 2.011957  | 0.940552  |
| C | -5.941592 | 2.189828  | 0.068549  |
| H | -3.906421 | 2.588123  | 2.780772  |
| H | -5.667225 | 2.253121  | 2.824356  |
| H | -5.045873 | 3.757303  | 2.081460  |
| H | -4.603770 | 0.993396  | 1.090702  |
| H | -5.807948 | 1.568184  | -0.813834 |
| H | -6.016572 | 3.238847  | -0.209005 |
| H | -6.827123 | 1.862437  | 0.612503  |
| S | -0.938240 | 1.945393  | 1.906678  |
| O | 0.363624  | 2.328167  | 1.311487  |
| O | -0.794666 | 1.043880  | 3.041395  |
| O | -1.530488 | 3.301141  | 2.568561  |
| O | -1.920004 | 1.522379  | 0.903406  |
| H | -1.619386 | 3.982207  | 1.855921  |
| H | -1.079728 | -2.859773 | 1.829165  |
| C | -2.363805 | -4.282279 | 2.626042  |
| N | -2.065133 | -2.898017 | 2.171789  |
| C | -2.286481 | -1.849971 | 3.208103  |

|   |           |           |           |
|---|-----------|-----------|-----------|
| H | -2.107300 | -4.974255 | 1.827085  |
| H | -3.421534 | -4.351294 | 2.878824  |
| H | -1.752652 | -4.511507 | 3.498120  |
| H | -2.670669 | -2.694445 | 1.345375  |
| H | -1.922385 | -0.891474 | 2.841622  |
| H | -1.737069 | -2.124882 | 4.108773  |
| H | -3.352980 | -1.783444 | 3.416749  |
| S | 1.199393  | -0.449669 | -1.433448 |
| O | 0.158881  | -1.429756 | -1.855190 |
| O | 2.539810  | -0.858642 | -1.870642 |
| O | 0.851524  | 0.917851  | -1.773428 |
| O | 1.198349  | -0.506545 | 0.163815  |
| H | 1.134724  | 2.826349  | -0.615303 |
| H | 0.931206  | -1.420287 | 0.484959  |
| S | -2.383219 | 4.839175  | -0.745955 |
| O | -3.523089 | 3.937362  | -0.699222 |
| O | -1.394686 | 4.533740  | -1.791190 |
| O | -3.083716 | 6.245781  | -1.198518 |
| O | -1.749058 | 5.111551  | 0.551568  |
| H | -2.388523 | 6.916653  | -1.233742 |
| H | -1.399860 | -0.569388 | -2.097322 |
| S | 0.900297  | -4.098061 | 0.422324  |
| O | 0.505800  | -2.819640 | 1.125402  |
| O | 0.369851  | -5.265554 | 1.077366  |
| O | 0.133241  | -4.029630 | -0.986180 |
| O | 2.336337  | -4.097146 | 0.144939  |
| H | 0.220397  | -3.121983 | -1.369036 |
| H | 3.663882  | -2.977009 | -0.059500 |
| C | 1.702011  | 4.743177  | -0.074406 |
| N | 1.194241  | 3.751490  | -1.062958 |
| C | 2.021224  | 3.670192  | -2.299115 |
| H | 1.048789  | 4.717434  | 0.792725  |
| H | 1.680754  | 5.731527  | -0.533499 |
| H | 2.719154  | 4.466076  | 0.193708  |
| H | 0.214926  | 4.001935  | -1.312514 |
| H | 3.029559  | 3.375736  | -2.016656 |
| H | 2.019762  | 4.647213  | -2.782338 |
| H | 1.589030  | 2.917154  | -2.951499 |
| C | -2.197346 | 1.335025  | -2.414161 |
| N | -2.274368 | -0.154858 | -2.476252 |
| C | -2.475330 | -0.697429 | -3.842880 |
| H | -2.014770 | 1.620478  | -1.382212 |
| H | -3.141935 | 1.753229  | -2.757849 |
| H | -1.375327 | 1.674704  | -3.038083 |

|      |           |           |           |
|------|-----------|-----------|-----------|
| H    | -3.073776 | -0.457533 | -1.877114 |
| H    | -2.511766 | -1.784440 | -3.789466 |
| H    | -1.642439 | -0.391869 | -4.474648 |
| H    | -3.412387 | -0.313944 | -4.244994 |
| C    | 5.555682  | -3.075591 | 0.798957  |
| N    | 4.597779  | -2.550062 | -0.212002 |
| C    | 5.018151  | -2.822759 | -1.614267 |
| H    | 5.192328  | -2.811535 | 1.790864  |
| H    | 6.525577  | -2.611508 | 0.611395  |
| H    | 5.609425  | -4.159939 | 0.706001  |
| H    | 4.508199  | -1.523698 | -0.054870 |
| H    | 5.082575  | -3.901734 | -1.753537 |
| H    | 5.988768  | -2.358816 | -1.778149 |
| H    | 4.268937  | -2.403033 | -2.279867 |
| 7DMA |           |           |           |
| C    | 2.784802  | -3.691139 | -0.668083 |
| N    | 1.923437  | -2.530461 | -0.867487 |
| C    | 1.523368  | -2.366859 | -2.260857 |
| H    | 2.230704  | -4.612274 | -0.878516 |
| H    | 3.113773  | -3.730978 | 0.373071  |
| H    | 3.682181  | -3.692189 | -1.311284 |
| H    | 2.417980  | -1.686262 | -0.557462 |
| H    | 0.882432  | -3.199697 | -2.569480 |
| H    | 2.374263  | -2.325692 | -2.963015 |
| H    | 0.947704  | -1.444928 | -2.371511 |
| C    | 4.441643  | -0.317446 | 1.122312  |
| N    | 3.583705  | 0.009049  | -0.012806 |
| C    | 4.351151  | 0.424456  | -1.183125 |
| H    | 5.046930  | -1.201749 | 0.895361  |
| H    | 3.825514  | -0.548986 | 1.994357  |
| H    | 5.135724  | 0.495364  | 1.398163  |
| H    | 2.953129  | 0.771820  | 0.258444  |
| H    | 4.945862  | -0.414188 | -1.561105 |
| H    | 5.045988  | 1.258057  | -0.981606 |
| H    | 3.669543  | 0.735003  | -1.978561 |
| C    | -0.271872 | -1.813826 | 2.172557  |
| N    | -0.553567 | -2.702554 | 1.050182  |
| C    | -0.724955 | -4.090250 | 1.467680  |
| H    | -1.141424 | -1.756014 | 2.836385  |
| H    | -0.066261 | -0.808720 | 1.797640  |
| H    | 0.589974  | -2.134550 | 2.783439  |
| H    | 0.225104  | -2.645068 | 0.383646  |
| H    | -1.619349 | -4.188667 | 2.092316  |
| H    | 0.127534  | -4.485652 | 2.046980  |

|     |           |           |           |
|-----|-----------|-----------|-----------|
| H   | -0.861575 | -4.725150 | 0.588840  |
| C   | -0.959419 | 4.179591  | -1.221980 |
| N   | -0.641558 | 2.775185  | -0.983746 |
| C   | -0.354752 | 2.053275  | -2.218869 |
| H   | -0.081554 | 4.703837  | -1.614814 |
| H   | -1.239283 | 4.658569  | -0.280520 |
| H   | -1.783587 | 4.330258  | -1.940761 |
| H   | -1.438730 | 2.327701  | -0.516315 |
| H   | 0.560302  | 2.441784  | -2.679012 |
| H   | -1.160034 | 2.126981  | -2.970325 |
| H   | -0.193455 | 0.996399  | -1.994419 |
| C   | 1.459157  | 2.437805  | 2.266431  |
| N   | 1.876262  | 2.515777  | 0.870137  |
| C   | 2.714189  | 3.682207  | 0.609883  |
| H   | 2.329174  | 2.272961  | 2.911201  |
| H   | 0.779223  | 1.593430  | 2.400763  |
| H   | 0.949029  | 3.348420  | 2.625883  |
| H   | 1.040792  | 2.566162  | 0.275235  |
| H   | 3.663302  | 3.592303  | 1.149366  |
| H   | 2.250094  | 4.636185  | 0.914963  |
| H   | 2.942289  | 3.742223  | -0.457074 |
| C   | -4.282586 | -2.250066 | 0.238605  |
| N   | -3.124819 | -1.601530 | -0.368174 |
| C   | -3.046242 | -1.837391 | -1.805864 |
| H   | -5.207157 | -1.799424 | -0.138132 |
| H   | -4.259920 | -2.106526 | 1.321656  |
| H   | -4.337722 | -3.334165 | 0.037935  |
| H   | -2.269359 | -1.955353 | 0.076242  |
| H   | -3.893369 | -1.363040 | -2.313196 |
| H   | -3.054995 | -2.907137 | -2.078741 |
| H   | -2.129317 | -1.394441 | -2.201270 |
| C   | -3.178598 | 1.604440  | 1.771386  |
| N   | -3.178508 | 1.464872  | 0.318987  |
| C   | -4.371943 | 2.039012  | -0.294048 |
| H   | -3.112773 | 2.662062  | 2.048894  |
| H   | -2.307227 | 1.095134  | 2.189170  |
| H   | -4.081713 | 1.191874  | 2.254211  |
| H   | -3.125104 | 0.468210  | 0.078459  |
| H   | -4.386732 | 3.124255  | -0.146299 |
| H   | -5.315302 | 1.637279  | 0.115073  |
| H   | -4.360943 | 1.849357  | -1.370104 |
| 7SA |           |           |           |
| S   | 1.624160  | 0.093228  | 2.866808  |
| O   | 2.424918  | -0.798813 | 2.014218  |

|   |           |           |           |
|---|-----------|-----------|-----------|
| O | 1.344019  | -0.281871 | 4.200000  |
| O | 2.334812  | 1.492806  | 2.872352  |
| O | 0.246968  | 0.333677  | 2.129428  |
| H | 2.414388  | 1.830736  | 1.948246  |
| H | 0.363772  | 0.650991  | 1.209773  |
| S | 5.327531  | -0.618604 | -0.015648 |
| O | 6.540071  | -1.174318 | -0.495024 |
| O | 4.095360  | -0.777334 | -0.788464 |
| O | 5.095739  | -1.181707 | 1.434400  |
| O | 5.465644  | 0.925733  | 0.271049  |
| H | 4.196528  | -0.946569 | 1.760208  |
| H | 4.925216  | 1.455936  | -0.365946 |
| S | -5.542231 | 0.262630  | 1.182838  |
| O | -6.379097 | 1.029246  | 2.026395  |
| O | -4.673569 | 0.896992  | 0.196282  |
| O | -4.616956 | -0.641837 | 2.101352  |
| O | -6.443143 | -0.771488 | 0.408932  |
| H | -3.858382 | -0.981486 | 1.583072  |
| H | -5.893605 | -1.274550 | -0.232309 |
| S | -3.066202 | -1.860962 | -1.174765 |
| O | -4.470234 | -2.100073 | -1.030747 |
| O | -2.577424 | -0.975197 | -2.205938 |
| O | -2.520193 | -1.299664 | 0.228650  |
| O | -2.402658 | -3.253641 | -1.271040 |
| H | -2.049032 | -0.434239 | 0.088232  |
| H | -1.406791 | -3.215405 | -1.362079 |
| S | -1.852012 | 2.252539  | -0.940039 |
| O | -0.931782 | 3.321450  | -1.190802 |
| O | -1.387303 | 1.108802  | -0.164974 |
| O | -3.080820 | 2.910217  | -0.258743 |
| O | -2.381091 | 1.728757  | -2.319440 |
| H | -3.766636 | 2.225788  | -0.004675 |
| H | -2.483853 | 0.742835  | -2.320591 |
| S | 2.348200  | 2.267468  | -1.057775 |
| O | 3.765067  | 2.411530  | -1.231309 |
| O | 1.861319  | 1.922847  | 0.271188  |
| O | 1.712395  | 3.595169  | -1.549958 |
| O | 1.745669  | 1.237591  | -2.072188 |
| H | 0.723462  | 3.556392  | -1.460018 |
| H | 1.503699  | 0.381716  | -1.625470 |
| S | 1.212162  | -2.373419 | -0.885670 |
| O | 0.901286  | -0.953544 | -0.832200 |
| O | 0.228912  | -3.265958 | -1.432898 |
| O | 2.510149  | -2.617452 | -1.700321 |

|         |           |           |           |
|---------|-----------|-----------|-----------|
| O       | 1.521410  | -2.855819 | 0.569594  |
| H       | 3.235075  | -1.984296 | -1.411107 |
| H       | 1.834687  | -2.102699 | 1.142318  |
| 7SA1DMA |           |           |           |
| S       | -2.499128 | -1.380629 | 2.953305  |
| O       | -2.015403 | -0.121030 | 2.395338  |
| O       | -2.326790 | -1.673392 | 4.329499  |
| O       | -4.030836 | -1.510632 | 2.631873  |
| O       | -1.856666 | -2.539857 | 2.079998  |
| H       | -4.200084 | -1.270693 | 1.689661  |
| H       | -1.321272 | -2.163719 | 1.348051  |
| S       | 4.508472  | -2.741250 | -0.654249 |
| O       | 4.757052  | -4.100056 | -0.964325 |
| O       | 3.376688  | -2.033214 | -1.242189 |
| O       | 4.377904  | -2.609512 | 0.920716  |
| O       | 5.812562  | -1.924054 | -0.995634 |
| H       | 3.995046  | -1.733856 | 1.145839  |
| H       | 5.728529  | -0.984513 | -0.711219 |
| S       | -4.815054 | -1.365370 | -1.147830 |
| O       | -4.067868 | -0.797191 | -0.008740 |
| O       | -6.121630 | -1.855379 | -0.904193 |
| O       | -4.778842 | -0.285684 | -2.292494 |
| O       | -3.977826 | -2.515511 | -1.786831 |
| H       | -4.671307 | 0.634958  | -1.941292 |
| H       | -3.021735 | -2.276994 | -1.878590 |
| S       | -2.690047 | 2.312862  | -0.982675 |
| O       | -4.062777 | 2.179541  | -1.400217 |
| O       | -1.724938 | 2.891457  | -1.881567 |
| O       | -2.712246 | 3.084087  | 0.374476  |
| O       | -2.107622 | 0.896761  | -0.609550 |
| H       | -1.784014 | 3.087359  | 0.751935  |
| H       | -2.807239 | 0.308723  | -0.218204 |
| S       | -0.078228 | -1.471615 | -1.461638 |
| O       | -1.347893 | -1.883763 | -1.989906 |
| O       | 0.554712  | -0.273775 | -1.939350 |
| O       | -0.253495 | -1.339067 | 0.121308  |
| O       | 0.861267  | -2.700331 | -1.607167 |
| H       | 0.101514  | -0.468038 | 0.479234  |
| H       | 1.827649  | -2.464401 | -1.468249 |
| S       | 4.162681  | 1.160317  | 0.457722  |
| O       | 5.439537  | 0.611448  | 0.104108  |
| O       | 3.338260  | 1.765617  | -0.558296 |
| O       | 3.350330  | -0.010908 | 1.149194  |
| O       | 4.401116  | 2.176557  | 1.622349  |

|   |           |          |           |
|---|-----------|----------|-----------|
| H | 2.356470  | 0.234779 | 1.230922  |
| H | 3.516231  | 2.475186 | 1.972338  |
| S | 0.631478  | 2.010177 | 1.905945  |
| O | 0.921767  | 0.682783 | 1.248622  |
| O | 1.852963  | 2.635092 | 2.374524  |
| O | -0.173755 | 2.849048 | 1.016052  |
| O | -0.202867 | 1.686573 | 3.197473  |
| H | 1.618870  | 1.996708 | -1.480924 |
| H | -0.917494 | 1.026409 | 2.994838  |
| C | 1.407693  | 4.041948 | -1.691571 |
| N | 1.099359  | 2.637105 | -2.093130 |
| C | 1.433005  | 2.318569 | -3.512477 |
| H | 1.107440  | 4.170831 | -0.654408 |
| H | 0.843844  | 4.717695 | -2.332412 |
| H | 2.477166  | 4.209441 | -1.801437 |
| H | 0.093790  | 2.470611 | -1.936362 |
| H | 1.178862  | 1.277985 | -3.695382 |
| H | 2.498971  | 2.479039 | -3.665175 |
| H | 0.854642  | 2.972929 | -4.162832 |

#### 7SA2DMA

|   |           |           |           |
|---|-----------|-----------|-----------|
| S | -5.649779 | -1.900662 | -1.065276 |
| O | -4.445130 | -1.827300 | -0.251427 |
| O | -6.233284 | -3.145939 | -1.402877 |
| O | -6.765529 | -1.031262 | -0.361551 |
| O | -5.359579 | -1.114109 | -2.417338 |
| H | -6.439686 | -0.118793 | -0.185166 |
| H | -4.769423 | -0.353753 | -2.231781 |
| S | 3.145369  | -4.021815 | -0.689241 |
| O | 3.633606  | -2.662377 | -0.845346 |
| O | 3.921346  | -5.126407 | -1.126291 |
| O | 2.840381  | -4.255070 | 0.848401  |
| O | 1.737642  | -4.111518 | -1.382664 |
| H | 2.464225  | -3.443788 | 1.256360  |
| H | 1.255824  | -3.243852 | -1.359600 |
| S | 3.444010  | 3.036758  | -1.815299 |
| O | 4.629628  | 3.111900  | -2.598379 |
| O | 3.302461  | 1.985394  | -0.819668 |
| O | 3.244882  | 4.419940  | -1.100016 |
| O | 2.215466  | 2.925006  | -2.804174 |
| H | 2.427107  | 4.377804  | -0.533569 |
| H | 1.405593  | 2.668679  | -2.299513 |
| S | 2.242174  | -0.736106 | 2.602510  |
| O | 1.225047  | -0.122833 | 3.420660  |
| O | 3.475552  | -1.197736 | 3.146721  |

|   |           |           |           |
|---|-----------|-----------|-----------|
| O | 1.592100  | -1.996836 | 1.872567  |
| O | 2.593061  | 0.231706  | 1.409025  |
| H | 0.672122  | -1.786312 | 1.503743  |
| H | 1.883347  | 0.930128  | 1.262111  |
| S | -4.194381 | 1.600416  | -0.058827 |
| O | -5.623272 | 1.524047  | -0.171588 |
| O | -3.546101 | 1.037962  | 1.100470  |
| O | -3.626724 | 0.891222  | -1.360408 |
| O | -3.789131 | 3.092617  | -0.231652 |
| H | -2.696515 | 0.506335  | -1.215202 |
| H | -2.828878 | 3.226574  | 0.034532  |
| S | -0.811030 | -1.359480 | -0.583030 |
| O | 0.399981  | -1.785379 | -1.252708 |
| O | -0.719596 | -1.381013 | 0.890808  |
| O | -1.266029 | -0.015801 | -1.055158 |
| O | -1.918596 | -2.387234 | -1.021034 |
| H | -0.335722 | 1.368446  | -1.160864 |
| H | -2.816590 | -2.191593 | -0.644811 |
| S | 0.067461  | 2.926123  | 0.312259  |
| O | 0.918503  | 4.090356  | 0.168109  |
| O | 0.073406  | 2.275669  | -1.179855 |
| O | 0.581212  | 1.876272  | 1.209945  |
| O | -1.326775 | 3.231990  | 0.640301  |
| H | 4.266197  | 0.501101  | -0.516950 |
| H | -2.116709 | 1.003476  | 2.219691  |
| C | -1.490455 | 2.075720  | 3.877728  |
| N | -1.502032 | 0.848438  | 3.031701  |
| C | -1.947308 | -0.385904 | 3.740540  |
| H | -1.216587 | 2.918895  | 3.248795  |
| H | -0.762189 | 1.942867  | 4.675685  |
| H | -2.485950 | 2.226462  | 4.293001  |
| H | -0.556245 | 0.706627  | 2.655942  |
| H | -2.951900 | -0.223444 | 4.128102  |
| H | -1.250112 | -0.594170 | 4.549267  |
| H | -1.948653 | -1.203709 | 3.024335  |
| C | 5.653567  | -0.220458 | -1.864261 |
| N | 4.959753  | -0.266234 | -0.544450 |
| C | 5.865222  | -0.154233 | 0.634242  |
| H | 6.118784  | 0.755432  | -1.990862 |
| H | 4.913613  | -0.376764 | -2.646599 |
| H | 6.398323  | -1.013841 | -1.900416 |
| H | 4.427747  | -1.150907 | -0.491282 |
| H | 6.383136  | 0.802977  | 0.592098  |
| H | 6.585479  | -0.970794 | 0.604528  |



|         |           |           |           |
|---------|-----------|-----------|-----------|
| H       | 5.266031  | -0.220117 | 1.539643  |
| 7SA3DMA |           |           |           |
| S       | -3.777547 | -3.737915 | -1.239148 |
| O       | -4.183743 | -5.095654 | -1.156874 |
| O       | -2.812962 | -3.311761 | -2.243599 |
| O       | -5.083540 | -2.879940 | -1.385475 |
| O       | -3.204189 | -3.280116 | 0.173788  |
| H       | -4.897840 | -1.908737 | -1.362169 |
| H       | -2.399252 | -2.717470 | 0.044277  |
| S       | 2.180534  | -2.173618 | 3.312230  |
| O       | 2.001307  | -2.872110 | 4.536438  |
| O       | 3.264459  | -2.517273 | 2.409175  |
| O       | 0.826092  | -2.261972 | 2.495310  |
| O       | 2.286121  | -0.641524 | 3.668199  |
| H       | 0.989406  | -2.276889 | 1.508891  |
| H       | 2.548303  | -0.109265 | 2.856657  |
| S       | -3.755101 | 0.640093  | -0.485245 |
| O       | -3.620072 | 0.446846  | 0.937031  |
| O       | -4.683859 | -0.198677 | -1.199659 |
| O       | -4.120480 | 2.105063  | -0.847186 |
| O       | -2.318129 | 0.550167  | -1.145164 |
| H       | -3.410816 | 2.740631  | -0.510942 |
| H       | -1.813441 | -0.237381 | -0.783278 |
| S       | -1.625158 | 4.054853  | 1.089233  |
| O       | -2.042595 | 3.214021  | 2.195870  |
| O       | -2.112674 | 3.613643  | -0.238415 |
| O       | -2.392111 | 5.472098  | 1.240544  |
| O       | -0.191563 | 4.361305  | 1.054262  |
| H       | -2.215461 | 5.817628  | 2.127429  |
| H       | 1.033462  | 3.396824  | 1.646911  |
| S       | 3.533657  | 0.717022  | -3.056656 |
| O       | 4.620094  | 0.381526  | -3.912219 |
| O       | 2.398210  | 1.474393  | -3.519547 |
| O       | 2.974933  | -0.650554 | -2.425371 |
| O       | 4.155737  | 1.412671  | -1.785083 |
| H       | 1.969883  | -0.687840 | -2.375815 |
| H       | 3.411663  | 1.723209  | -1.185310 |
| S       | 1.747744  | 1.512564  | 0.952432  |
| O       | 2.837819  | 0.669425  | 1.463277  |
| O       | 1.750664  | 2.763790  | 1.928934  |
| O       | 2.037133  | 2.023107  | -0.409019 |
| O       | 0.424922  | 0.896662  | 1.014969  |
| H       | -0.843553 | 3.032610  | -1.449365 |
| H       | 3.676976  | -1.320933 | -0.796376 |

|   |           |           |           |
|---|-----------|-----------|-----------|
| S | 0.119481  | -1.986663 | -1.008352 |
| O | 0.422938  | -0.985296 | -2.034524 |
| O | 1.252648  | -2.275613 | -0.126166 |
| O | -1.119495 | -1.625510 | -0.262881 |
| O | -0.181559 | -3.367532 | -1.716204 |
| H | -0.801249 | 0.347448  | 2.236886  |
| H | -1.117861 | -3.384434 | -2.052217 |
| C | -2.124171 | -0.899360 | 3.283356  |
| N | -1.510144 | 0.428805  | 2.986919  |
| C | -0.847810 | 1.070218  | 4.160417  |
| H | -2.626669 | -1.252889 | 2.388415  |
| H | -2.848605 | -0.776729 | 4.087496  |
| H | -1.336084 | -1.589431 | 3.574835  |
| H | -2.211896 | 1.069283  | 2.595000  |
| H | -0.469557 | 2.038688  | 3.846149  |
| H | -0.030387 | 0.431898  | 4.490536  |
| H | -1.581578 | 1.195879  | 4.955284  |
| C | 4.442059  | -3.226814 | -0.660944 |
| N | 4.239177  | -1.853566 | -0.117350 |
| C | 5.494234  | -1.106285 | 0.180645  |
| H | 3.462588  | -3.670592 | -0.825478 |
| H | 5.000394  | -3.813646 | 0.066484  |
| H | 4.989072  | -3.160499 | -1.600170 |
| H | 3.686595  | -1.931990 | 0.752397  |
| H | 5.219437  | -0.131838 | 0.577489  |
| H | 6.066304  | -0.988648 | -0.738213 |
| H | 6.066628  | -1.666561 | 0.918415  |
| C | -0.660281 | 2.257376  | -3.376693 |
| N | -0.092402 | 2.885304  | -2.146456 |
| C | 0.584138  | 4.193687  | -2.384589 |
| H | -1.113797 | 1.309727  | -3.100223 |
| H | 0.146482  | 2.097014  | -4.086635 |
| H | -1.415224 | 2.926898  | -3.787651 |
| H | 0.596369  | 2.260598  | -1.700543 |
| H | 0.916941  | 4.582186  | -1.424819 |
| H | -0.130031 | 4.880336  | -2.836910 |
| H | 1.430758  | 4.027254  | -3.047563 |

#### 7SA4DMA

|   |           |           |           |
|---|-----------|-----------|-----------|
| S | -3.076831 | -3.859253 | -1.845942 |
| O | -3.587009 | -4.989074 | -2.544130 |
| O | -1.937925 | -4.003179 | -0.957052 |
| O | -2.727508 | -2.778148 | -2.947246 |
| O | -4.242306 | -3.173225 | -1.042963 |
| H | -2.136045 | -2.061980 | -2.602300 |

|   |           |           |           |
|---|-----------|-----------|-----------|
| H | -3.987162 | -2.982855 | -0.080457 |
| S | 0.283307  | 4.046359  | -1.593850 |
| O | 1.149525  | 3.560686  | -0.523333 |
| O | 0.396580  | 5.403099  | -2.012612 |
| O | 0.487019  | 3.148807  | -2.865053 |
| O | -1.203319 | 3.710169  | -1.205380 |
| H | 0.494209  | 2.171602  | -2.619066 |
| H | -1.327376 | 3.477420  | -0.225687 |
| S | 6.404036  | -1.138366 | -0.353047 |
| O | 5.707411  | 0.129559  | -0.446936 |
| O | 7.684181  | -1.314278 | -0.943264 |
| O | 6.524380  | -1.531517 | 1.169284  |
| O | 5.445849  | -2.255861 | -0.955729 |
| H | 5.636098  | -1.430875 | 1.603081  |
| H | 4.514061  | -2.063041 | -0.698508 |
| S | -3.117613 | 2.897723  | 1.627650  |
| O | -1.691324 | 3.122983  | 1.250056  |
| O | -3.233176 | 1.977322  | 2.742353  |
| O | -3.627274 | 4.297266  | 2.259548  |
| O | -3.951378 | 2.654397  | 0.455574  |
| H | -3.817718 | 4.907267  | 1.532696  |
| H | -3.810218 | 1.397258  | -0.877158 |
| C | -5.000615 | 0.072793  | -1.947800 |
| N | -3.812981 | 0.965791  | -1.818694 |
| C | -3.739668 | 2.046218  | -2.842099 |
| H | -4.936568 | -0.693192 | -1.180942 |
| H | -4.987250 | -0.393797 | -2.931632 |
| H | -5.903411 | 0.668870  | -1.821887 |
| H | -2.954031 | 0.392399  | -1.880969 |
| H | -2.850673 | 2.644231  | -2.652913 |
| H | -4.628116 | 2.670633  | -2.760291 |
| H | -3.687980 | 1.593223  | -3.831190 |
| S | 2.766427  | -1.016397 | 1.458249  |
| O | 4.018081  | -1.403134 | 2.087635  |
| O | 2.625706  | 0.443109  | 1.254460  |
| O | 2.910809  | -1.634787 | -0.052941 |
| O | 1.570402  | -1.614307 | 2.034885  |
| H | 2.036377  | -1.560352 | -0.529584 |
| H | 1.101765  | 1.222621  | 1.920599  |
| S | -0.162370 | -0.285593 | -1.529713 |
| O | -0.608274 | 0.470591  | -0.206350 |
| O | 0.504746  | -1.533082 | -1.146388 |
| O | -1.406927 | -0.531223 | -2.289720 |
| O | 0.749866  | 0.659131  | -2.184481 |

|         |           |           |           |
|---------|-----------|-----------|-----------|
| H       | -0.970291 | -3.570931 | 0.553035  |
| H       | 2.623639  | 2.497758  | -0.846982 |
| S       | -3.043585 | -1.321772 | 1.704328  |
| O       | -1.802541 | -1.412608 | 2.459675  |
| O       | -3.648416 | -2.621517 | 1.398703  |
| O       | -4.144357 | -0.591888 | 2.589292  |
| O       | -2.880840 | -0.482236 | 0.482532  |
| H       | -3.877383 | 0.351190  | 2.708967  |
| H       | -1.463481 | 0.052947  | 0.152223  |
| C       | -0.638607 | -4.354861 | 2.448303  |
| N       | -0.169552 | -3.711790 | 1.186984  |
| C       | 0.851664  | -4.504784 | 0.445372  |
| H       | -1.358082 | -3.689006 | 2.915861  |
| H       | 0.220421  | -4.505799 | 3.100594  |
| H       | -1.101665 | -5.309322 | 2.202378  |
| H       | 0.229126  | -2.786270 | 1.413541  |
| H       | 0.436877  | -5.485837 | 0.221470  |
| H       | 1.744158  | -4.594483 | 1.061887  |
| H       | 1.080168  | -3.984393 | -0.480501 |
| C       | 0.040942  | 1.005462  | 3.695572  |
| N       | 0.481110  | 1.804976  | 2.512904  |
| C       | 1.205967  | 3.057620  | 2.862896  |
| H       | -0.447011 | 0.100005  | 3.341885  |
| H       | -0.659457 | 1.603882  | 4.276197  |
| H       | 0.917690  | 0.753818  | 4.290684  |
| H       | -0.344742 | 2.071708  | 1.951291  |
| H       | 1.423244  | 3.595753  | 1.942340  |
| H       | 2.126464  | 2.798015  | 3.384028  |
| H       | 0.568930  | 3.665982  | 3.503040  |
| C       | 3.824067  | 1.680302  | -2.339099 |
| N       | 3.559334  | 2.065370  | -0.920270 |
| C       | 4.562695  | 3.011763  | -0.354359 |
| H       | 3.048295  | 0.985533  | -2.651364 |
| H       | 4.803012  | 1.212234  | -2.386374 |
| H       | 3.788181  | 2.578407  | -2.954785 |
| H       | 3.521904  | 1.229096  | -0.317276 |
| H       | 4.286393  | 3.233258  | 0.674831  |
| H       | 4.555849  | 3.926866  | -0.944876 |
| H       | 5.537988  | 2.533014  | -0.381202 |
| 7SA5DMA |           |           |           |
| S       | 3.059739  | 4.309648  | -2.297600 |
| O       | 4.025214  | 3.721481  | -1.387985 |
| O       | 3.475379  | 5.202519  | -3.324832 |
| O       | 2.273115  | 3.119129  | -2.992146 |

|   |           |           |           |
|---|-----------|-----------|-----------|
| O | 1.957079  | 5.053603  | -1.459898 |
| H | 2.352752  | 2.297012  | -2.446785 |
| H | 1.760937  | 4.589935  | -0.595472 |
| S | -0.571788 | -3.916371 | -1.437082 |
| O | 0.771767  | -4.453446 | -1.469585 |
| O | -1.672529 | -4.698764 | -1.905776 |
| O | -0.789350 | -3.453877 | 0.047694  |
| O | -0.612610 | -2.569407 | -2.262241 |
| H | -1.671029 | -2.943990 | 0.170209  |
| H | 0.208121  | -2.018053 | -2.072826 |
| S | 4.458407  | -1.891767 | 1.611684  |
| O | 4.430892  | -0.579078 | 2.261453  |
| O | 3.251542  | -2.698103 | 1.757354  |
| O | 4.941687  | -1.829121 | 0.221626  |
| O | 5.555303  | -2.771178 | 2.442569  |
| H | 3.915050  | -2.830448 | -0.789717 |
| H | 6.343743  | -2.224051 | 2.562294  |
| C | 3.759488  | -3.368461 | -2.792804 |
| N | 3.449840  | -3.573999 | -1.351754 |
| C | 3.862715  | -4.897853 | -0.811216 |
| H | 3.395940  | -2.383458 | -3.076275 |
| H | 3.252769  | -4.136156 | -3.375782 |
| H | 4.837357  | -3.433890 | -2.936924 |
| H | 2.432944  | -3.479614 | -1.225475 |
| H | 3.629486  | -4.912586 | 0.251245  |
| H | 4.935143  | -5.021133 | -0.956800 |
| H | 3.310382  | -5.679327 | -1.329487 |
| S | -2.877726 | -0.915325 | 1.286109  |
| O | -2.947985 | 0.339958  | 0.533661  |
| O | -1.781928 | -1.021252 | 2.238722  |
| O | -4.176153 | -1.028701 | 2.168947  |
| O | -2.902441 | -2.067224 | 0.324060  |
| H | -4.993806 | -0.898485 | 1.589785  |
| H | 1.529052  | -1.882340 | 2.098740  |
| C | 0.481227  | -3.308657 | 3.151601  |
| N | 0.752414  | -1.893557 | 2.775422  |
| C | 1.107118  | -1.020150 | 3.929339  |
| H | 0.216483  | -3.855463 | 2.249290  |
| H | -0.349551 | -3.329833 | 3.855173  |
| H | 1.379992  | -3.729448 | 3.598108  |
| H | -0.095516 | -1.507471 | 2.321048  |
| H | 1.242360  | -0.001945 | 3.572267  |
| H | 2.028931  | -1.386591 | 4.377321  |
| H | 0.290276  | -1.047552 | 4.648819  |

|   |           |           |           |
|---|-----------|-----------|-----------|
| S | 0.242587  | 3.160155  | 1.225786  |
| O | -0.466651 | 2.620853  | 0.046207  |
| O | 1.458916  | 3.897717  | 0.863861  |
| O | -0.650708 | 3.858491  | 2.138418  |
| O | 0.747462  | 1.879850  | 2.069353  |
| H | -2.308404 | 3.276569  | 1.803917  |
| H | 1.011372  | 1.163717  | 1.438970  |
| S | -6.570752 | 0.474169  | -0.164693 |
| O | -6.215488 | 0.357429  | -1.589997 |
| O | -6.184442 | 1.712390  | 0.474033  |
| O | -8.197687 | 0.527298  | -0.120912 |
| O | -6.200819 | -0.755911 | 0.566830  |
| H | -8.527363 | -0.291242 | -0.516053 |
| H | -3.602338 | -1.492188 | -1.229154 |
| S | 1.507307  | 0.011900  | -1.008256 |
| O | 1.455650  | -0.146241 | 0.455118  |
| O | 1.586811  | -1.273113 | -1.721414 |
| O | 0.121496  | 0.604286  | -1.482437 |
| O | 2.567709  | 0.952814  | -1.407305 |
| H | -0.129083 | 1.395967  | -0.908603 |
| H | 4.324195  | 0.874538  | 1.192814  |
| C | -4.174098 | 2.925390  | 2.667901  |
| N | -3.248314 | 2.954222  | 1.501187  |
| C | -3.705827 | 3.817725  | 0.374738  |
| H | -3.752268 | 2.266543  | 3.425853  |
| H | -5.137670 | 2.546540  | 2.334263  |
| H | -4.270108 | 3.934241  | 3.068815  |
| H | -3.124829 | 1.985098  | 1.146715  |
| H | -3.807192 | 4.841487  | 0.734449  |
| H | -4.659273 | 3.437022  | 0.014233  |
| H | -2.946812 | 3.775912  | -0.404124 |
| C | -3.129507 | -0.384018 | -2.921878 |
| N | -4.057568 | -1.232102 | -2.124383 |
| C | -4.500452 | -2.478830 | -2.803394 |
| H | -2.813809 | 0.447816  | -2.296444 |
| H | -3.656965 | -0.015498 | -3.801160 |
| H | -2.262925 | -0.974640 | -3.209524 |
| H | -4.898084 | -0.655091 | -1.875447 |
| H | -5.198084 | -2.995766 | -2.146212 |
| H | -3.636766 | -3.115051 | -2.992084 |
| H | -4.997119 | -2.219828 | -3.737991 |
| C | 4.513637  | 2.914551  | 1.539426  |
| N | 4.530662  | 1.725557  | 0.637971  |
| C | 5.825718  | 1.511947  | -0.068077 |

|   |          |          |           |
|---|----------|----------|-----------|
| H | 3.506845 | 3.037935 | 1.931629  |
| H | 4.778493 | 3.791738 | 0.955295  |
| H | 5.227242 | 2.745281 | 2.345317  |
| H | 3.794990 | 1.813656 | -0.077593 |
| H | 6.622177 | 1.453893 | 0.673093  |
| H | 5.986150 | 2.345188 | -0.747767 |
| H | 5.762208 | 0.572549 | -0.613070 |

7SA6DMA

|   |           |           |           |
|---|-----------|-----------|-----------|
| S | 4.661309  | -2.979433 | -2.226059 |
| O | 5.388619  | -3.519750 | -3.324961 |
| O | 3.891384  | -3.840009 | -1.350954 |
| O | 5.703155  | -2.178514 | -1.342601 |
| O | 3.706656  | -1.857546 | -2.788391 |
| H | 5.276260  | -1.866837 | -0.495883 |
| H | 2.943536  | -1.665946 | -2.160079 |
| S | 3.132669  | 4.867121  | 0.077828  |
| O | 4.498962  | 4.786148  | -0.405474 |
| O | 2.258409  | 5.801401  | -0.610077 |
| O | 2.510171  | 3.524375  | 0.265973  |
| O | 3.211705  | 5.366003  | 1.644607  |
| H | 3.730130  | 2.229335  | 0.025035  |
| H | 3.597458  | 6.253126  | 1.638395  |
| C | 4.597296  | 1.568132  | -1.734350 |
| N | 4.500169  | 1.584882  | -0.245115 |
| C | 5.757199  | 2.002515  | 0.439081  |
| H | 3.625132  | 1.294729  | -2.141650 |
| H | 5.343172  | 0.832114  | -2.031029 |
| H | 4.879815  | 2.565520  | -2.066550 |
| H | 4.274759  | 0.634679  | 0.099289  |
| H | 5.593546  | 1.948226  | 1.514074  |
| H | 5.988128  | 3.023175  | 0.145562  |
| H | 6.552163  | 1.313917  | 0.157202  |
| S | 3.880085  | -1.340357 | 1.978078  |
| O | 3.136672  | -0.189430 | 2.457564  |
| O | 3.174158  | -2.605619 | 1.882665  |
| O | 4.648001  | -1.011093 | 0.745716  |
| O | 5.012854  | -1.537358 | 3.139271  |
| H | 1.173872  | 0.543623  | 2.087295  |
| H | 5.429306  | -2.398575 | 2.997237  |
| C | 0.332911  | 0.075142  | 3.917258  |
| N | 0.627997  | 1.029221  | 2.812147  |
| C | 1.378782  | 2.240936  | 3.245833  |
| H | -0.210052 | -0.772442 | 3.504356  |
| H | -0.274400 | 0.583194  | 4.666306  |

|   |           |           |           |
|---|-----------|-----------|-----------|
| H | 1.278006  | -0.252995 | 4.343697  |
| H | -0.253855 | 1.323619  | 2.355474  |
| H | 1.618158  | 2.844745  | 2.372281  |
| H | 2.299774  | 1.918392  | 3.726088  |
| H | 0.759229  | 2.806452  | 3.941354  |
| S | 0.897204  | -0.156288 | -1.215191 |
| O | 1.239079  | 0.726205  | -2.316240 |
| O | 0.716202  | 0.509760  | 0.072830  |
| O | -0.563891 | -0.741725 | -1.640511 |
| O | 1.763378  | -1.355062 | -1.111061 |
| H | -0.873306 | -1.433913 | -0.995447 |
| H | 0.683728  | -3.900944 | 0.800692  |
| C | 2.151259  | -5.355199 | 0.856074  |
| N | 1.469264  | -4.210008 | 0.194336  |
| C | 0.912625  | -4.532168 | -1.148905 |
| H | 2.516018  | -5.015675 | 1.821966  |
| H | 2.984861  | -5.668011 | 0.231165  |
| H | 1.432239  | -6.163765 | 0.982860  |
| H | 2.134588  | -3.430751 | 0.122661  |
| H | 0.484145  | -3.623632 | -1.561371 |
| H | 0.137970  | -5.288046 | -1.028533 |
| H | 1.720485  | -4.887381 | -1.782613 |
| S | -2.749050 | 1.691298  | 0.777803  |
| O | -1.760514 | 2.130887  | 1.759925  |
| O | -3.205177 | 0.298044  | 0.971798  |
| O | -4.008611 | 2.622675  | 1.065318  |
| O | -2.340239 | 1.933572  | -0.618414 |
| H | -4.724572 | 2.419786  | 0.408160  |
| H | -0.695766 | 2.791094  | -0.720478 |
| S | -1.926386 | -2.973201 | 1.152136  |
| O | -0.874478 | -3.858058 | 1.634202  |
| O | -1.797088 | -2.618490 | -0.277690 |
| O | -3.282232 | -3.429437 | 1.480420  |
| O | -1.678241 | -1.610162 | 1.968142  |
| H | -2.399152 | 0.067328  | -1.932757 |
| H | -2.229383 | -0.877400 | 1.577290  |
| S | -6.564207 | 0.702272  | -0.831282 |
| O | -5.876045 | 1.995743  | -0.798935 |
| O | -7.461325 | 0.441562  | 0.276896  |
| O | -7.454879 | 0.718890  | -2.199898 |
| O | -5.646840 | -0.428081 | -1.109881 |
| H | -8.123121 | 1.412044  | -2.101033 |
| H | -5.487532 | -1.337839 | 0.467900  |
| C | 0.149481  | 3.844422  | -2.296621 |



|         |           |           |           |
|---------|-----------|-----------|-----------|
| N       | -0.090394 | 3.619916  | -0.842774 |
| C       | -0.745464 | 4.769115  | -0.154091 |
| H       | 0.594907  | 2.938895  | -2.704622 |
| H       | 0.822642  | 4.692839  | -2.402589 |
| H       | -0.805341 | 4.051112  | -2.780032 |
| H       | 0.825179  | 3.430997  | -0.390312 |
| H       | -1.703419 | 4.962022  | -0.634822 |
| H       | -0.086155 | 5.630775  | -0.222680 |
| H       | -0.916699 | 4.490063  | 0.883434  |
| C       | -3.491315 | 1.015251  | -3.410478 |
| N       | -3.258460 | -0.115758 | -2.471623 |
| C       | -3.161623 | -1.449093 | -3.127894 |
| H       | -3.559986 | 1.925803  | -2.821376 |
| H       | -4.425633 | 0.842039  | -3.942785 |
| H       | -2.659224 | 1.072297  | -4.111404 |
| H       | -4.053156 | -0.142131 | -1.801470 |
| H       | -2.980621 | -2.196376 | -2.357507 |
| H       | -2.331351 | -1.438386 | -3.831589 |
| H       | -4.100145 | -1.651030 | -3.642668 |
| C       | -5.697761 | -1.169828 | 2.530411  |
| N       | -5.574549 | -1.973819 | 1.281342  |
| C       | -6.727335 | -2.877218 | 1.027154  |
| H       | -4.817895 | -0.535605 | 2.607884  |
| H       | -5.752766 | -1.849676 | 3.380168  |
| H       | -6.592329 | -0.554346 | 2.461192  |
| H       | -4.688060 | -2.531319 | 1.322224  |
| H       | -7.625901 | -2.271999 | 0.920183  |
| H       | -6.827542 | -3.573506 | 1.859042  |
| H       | -6.541085 | -3.428514 | 0.106881  |
| 7SA7DMA |           |           |           |
| S       | -3.702664 | -3.063405 | -0.552988 |
| O       | -2.438290 | -3.572434 | -0.013619 |
| O       | -4.828201 | -3.995110 | -0.411826 |
| O       | -4.023679 | -1.723734 | -0.014459 |
| O       | -3.543686 | -2.898512 | -2.129152 |
| H       | -6.816177 | -1.835625 | 0.990507  |
| H       | -2.893779 | -2.166461 | -2.317820 |
| C       | -7.572827 | -3.652735 | 1.649720  |
| N       | -7.063639 | -2.768080 | 0.573787  |
| C       | -8.023128 | -2.537622 | -0.537848 |
| H       | -6.793815 | -3.769670 | 2.401452  |
| H       | -7.822887 | -4.627491 | 1.231426  |
| H       | -8.454435 | -3.200511 | 2.103415  |
| H       | -6.184038 | -3.189272 | 0.183534  |

|   |           |           |           |
|---|-----------|-----------|-----------|
| H | -7.571100 | -1.833347 | -1.233054 |
| H | -8.940891 | -2.109085 | -0.135785 |
| H | -8.232427 | -3.483629 | -1.036592 |
| S | 4.913784  | -3.351266 | -0.795177 |
| O | 3.852164  | -3.322818 | -1.783988 |
| O | 5.820758  | -2.189034 | -0.839741 |
| O | 4.505169  | -3.662951 | 0.579674  |
| O | 5.851049  | -4.640106 | -1.165336 |
| H | 5.343589  | -2.611727 | 1.630235  |
| H | 5.976159  | -4.637178 | -2.124240 |
| C | 5.445138  | -1.850854 | 3.572760  |
| N | 5.946236  | -1.950161 | 2.175943  |
| C | 7.360884  | -2.391222 | 2.051012  |
| H | 4.415301  | -1.499140 | 3.542424  |
| H | 6.062352  | -1.142647 | 4.125416  |
| H | 5.499333  | -2.833786 | 4.040478  |
| H | 5.840623  | -1.031679 | 1.701849  |
| H | 7.607832  | -2.422055 | 0.992104  |
| H | 7.466408  | -3.384533 | 2.486185  |
| H | 8.006122  | -1.683394 | 2.570830  |
| S | -6.131382 | 0.755255  | 0.799693  |
| O | -6.649334 | -0.314115 | 1.671651  |
| O | -7.041801 | 1.845054  | 0.531911  |
| O | -4.783009 | 1.207007  | 1.236704  |
| O | -5.894121 | 0.068223  | -0.647700 |
| H | -3.410547 | 0.166811  | 1.745124  |
| H | -5.121277 | -0.550128 | -0.566524 |
| C | -2.014243 | 1.068892  | 2.967615  |
| N | -2.452741 | -0.046128 | 2.085452  |
| C | -2.412243 | -1.371859 | 2.757738  |
| H | -2.051158 | 1.996913  | 2.403523  |
| H | -0.992063 | 0.871975  | 3.284288  |
| H | -2.685121 | 1.120664  | 3.825132  |
| H | -1.865944 | -0.078606 | 1.225429  |
| H | -2.663104 | -2.135495 | 2.027599  |
| H | -3.136153 | -1.374928 | 3.573198  |
| H | -1.405271 | -1.526918 | 3.139845  |
| S | -1.567201 | 0.161220  | -1.664778 |
| O | -1.721871 | -0.989582 | -2.563730 |
| O | -1.063994 | -0.235620 | -0.338896 |
| O | -0.334943 | 0.968689  | -2.370858 |
| O | -2.681643 | 1.090948  | -1.619510 |
| H | -0.307184 | 1.905121  | -2.026374 |
| H | -3.141871 | 3.696884  | -0.604326 |

|   |           |           |           |
|---|-----------|-----------|-----------|
| C | -4.763588 | 4.383950  | 0.472823  |
| N | -4.130321 | 3.414328  | -0.462589 |
| C | -4.821160 | 3.312808  | -1.780447 |
| H | -4.178679 | 4.410336  | 1.390128  |
| H | -5.777326 | 4.048661  | 0.683308  |
| H | -4.760696 | 5.370763  | 0.011672  |
| H | -4.136978 | 2.483871  | -0.008709 |
| H | -4.298535 | 2.566452  | -2.372238 |
| H | -4.786491 | 4.287523  | -2.266866 |
| H | -5.849820 | 3.003710  | -1.604134 |
| S | 1.707615  | 0.075785  | 1.380205  |
| O | 0.738480  | -0.603963 | 2.222356  |
| O | 1.468066  | 1.526254  | 1.217499  |
| O | 3.081289  | -0.014763 | 2.238835  |
| O | 1.983856  | -0.596145 | 0.100209  |
| H | 3.838654  | 0.313188  | 1.695853  |
| H | 0.683975  | -1.951359 | -0.196548 |
| S | -0.358420 | 4.080162  | -0.348810 |
| O | -1.648007 | 4.703129  | -0.614132 |
| O | 0.238280  | 3.382486  | -1.505406 |
| O | 0.619167  | 4.966180  | 0.299379  |
| O | -0.729448 | 2.930840  | 0.716214  |
| H | 1.511751  | 0.627976  | -2.196342 |
| H | 0.057682  | 2.339909  | 0.871801  |
| S | 5.553675  | 1.388952  | -0.154578 |
| O | 5.438951  | 0.545519  | 1.067990  |
| O | 6.508511  | 2.461800  | -0.055890 |
| O | 6.058446  | 0.418878  | -1.316623 |
| O | 4.201097  | 1.843908  | -0.569993 |
| H | 5.867457  | -0.535045 | -1.116806 |
| H | 3.325533  | 3.172235  | 0.293369  |
| C | 0.476302  | -3.424265 | -1.655046 |
| N | 0.281779  | -2.901986 | -0.271559 |
| C | 0.890375  | -3.755334 | 0.786202  |
| H | 0.002339  | -2.726789 | -2.343786 |
| H | -0.015586 | -4.393547 | -1.726031 |
| H | 1.543379  | -3.517742 | -1.848731 |
| H | -0.736895 | -2.832997 | -0.107758 |
| H | 1.957776  | -3.853757 | 0.593951  |
| H | 0.402126  | -4.728964 | 0.771701  |
| H | 0.733902  | -3.264777 | 1.744925  |
| C | 3.058415  | -0.438221 | -3.085138 |
| N | 2.486417  | 0.801357  | -2.492620 |
| C | 2.497545  | 1.970632  | -3.414683 |

|         |           |           |           |
|---------|-----------|-----------|-----------|
| H       | 3.065171  | -1.224266 | -2.335186 |
| H       | 4.079988  | -0.233022 | -3.402115 |
| H       | 2.450885  | -0.734153 | -3.939930 |
| H       | 3.028639  | 1.044897  | -1.642382 |
| H       | 2.013999  | 2.808750  | -2.916773 |
| H       | 1.943688  | 1.713444  | -4.316578 |
| H       | 3.531206  | 2.211235  | -3.658987 |
| C       | 3.383556  | 3.948939  | 2.202695  |
| N       | 3.163058  | 4.094007  | 0.738826  |
| C       | 4.058901  | 5.081536  | 0.079083  |
| H       | 2.715277  | 3.169990  | 2.562652  |
| H       | 3.164100  | 4.898080  | 2.690835  |
| H       | 4.420856  | 3.665582  | 2.379973  |
| H       | 2.163759  | 4.366925  | 0.565600  |
| H       | 5.086593  | 4.725696  | 0.140977  |
| H       | 3.948799  | 6.048063  | 0.569714  |
| H       | 3.763313  | 5.169354  | -0.964982 |
| 7SA8DMA |           |           |           |
| C       | 9.576456  | 1.239760  | -1.711841 |
| N       | 8.600627  | 0.436039  | -0.971764 |
| C       | 9.210092  | -0.563923 | -0.087873 |
| H       | 10.169383 | 1.830397  | -1.008592 |
| H       | 9.050907  | 1.927980  | -2.376295 |
| H       | 10.266328 | 0.629061  | -2.311468 |
| H       | 7.969921  | -0.029426 | -1.621364 |
| H       | 9.791738  | -0.055985 | 0.685924  |
| H       | 9.877450  | -1.254318 | -0.622449 |
| H       | 8.420021  | -1.136929 | 0.399245  |
| S       | -6.601154 | 1.221784  | 0.175944  |
| O       | -6.557664 | -0.215709 | 0.417977  |
| O       | -5.806761 | 2.051528  | 1.064158  |
| O       | -6.412620 | 1.560190  | -1.260854 |
| O       | -8.130111 | 1.703218  | 0.508988  |
| H       | -5.012937 | 2.774070  | -1.570247 |
| H       | -8.718363 | 1.221975  | -0.088716 |
| C       | -3.542384 | 3.496663  | -2.882753 |
| N       | -4.071462 | 3.203595  | -1.520451 |
| C       | -4.123894 | 4.391954  | -0.623783 |
| H       | -3.567311 | 2.575380  | -3.460401 |
| H       | -2.520711 | 3.855600  | -2.775185 |
| H       | -4.169920 | 4.255291  | -3.350652 |
| H       | -3.493676 | 2.443656  | -1.107553 |
| H       | -4.618727 | 4.093203  | 0.297554  |
| H       | -4.705070 | 5.172693  | -1.115113 |

|   |           |           |           |
|---|-----------|-----------|-----------|
| H | -3.106028 | 4.728443  | -0.440540 |
| S | 0.292114  | 4.151953  | -0.378715 |
| O | -0.997518 | 3.573617  | -0.710345 |
| O | 0.574330  | 4.261051  | 1.062468  |
| O | 1.443963  | 3.610754  | -1.113041 |
| O | 0.111839  | 5.696535  | -0.915135 |
| H | 3.283248  | 2.285918  | 1.343220  |
| H | 0.949969  | 6.154957  | -0.770065 |
| C | 3.261817  | 3.201311  | 3.221351  |
| N | 3.082161  | 3.221690  | 1.745611  |
| C | 3.964415  | 4.191753  | 1.039971  |
| H | 2.603681  | 2.438856  | 3.629266  |
| H | 3.013447  | 4.184964  | 3.619881  |
| H | 4.300472  | 2.960108  | 3.447204  |
| H | 2.093103  | 3.461078  | 1.521273  |
| H | 3.699145  | 4.175703  | -0.013857 |
| H | 5.000583  | 3.880746  | 1.160175  |
| H | 3.803657  | 5.184844  | 1.460079  |
| S | -3.384622 | -0.311826 | -1.857241 |
| O | -3.166372 | 0.660376  | -0.752027 |
| O | -2.260612 | -0.447116 | -2.760252 |
| O | -3.950384 | -1.572123 | -1.374501 |
| O | -4.525138 | 0.374815  | -2.793799 |
| H | -4.963297 | -2.025780 | 0.192535  |
| H | -5.313151 | 0.582901  | -2.238390 |
| C | -5.823167 | -2.941157 | 1.868695  |
| N | -5.251329 | -2.970099 | 0.497460  |
| C | -6.173121 | -3.496955 | -0.541937 |
| H | -5.030912 | -2.641399 | 2.549531  |
| H | -6.177033 | -3.939611 | 2.126548  |
| H | -6.637061 | -2.219999 | 1.888714  |
| H | -4.360903 | -3.507635 | 0.501722  |
| H | -5.668085 | -3.425831 | -1.502063 |
| H | -7.067983 | -2.877190 | -0.553649 |
| H | -6.426398 | -4.531563 | -0.310490 |
| S | 2.943232  | -2.552115 | -1.681161 |
| O | 2.819216  | -1.541209 | -0.611400 |
| O | 1.935944  | -2.351054 | -2.746855 |
| O | 4.361555  | -2.261936 | -2.379026 |
| O | 2.985091  | -3.924806 | -1.197146 |
| H | 4.778301  | -1.465162 | -1.965424 |
| H | -0.685310 | -3.171756 | -1.282768 |
| C | -0.063796 | -5.088771 | -1.722547 |
| N | -0.398418 | -3.697524 | -2.135293 |

|   |           |           |           |
|---|-----------|-----------|-----------|
| C | -1.470294 | -3.599804 | -3.161477 |
| H | 0.814712  | -5.049848 | -1.082096 |
| H | 0.164448  | -5.677236 | -2.611145 |
| H | -0.915650 | -5.508717 | -1.189267 |
| H | 0.473181  | -3.221193 | -2.468164 |
| H | -1.697222 | -2.548767 | -3.332548 |
| H | -2.361380 | -4.099863 | -2.784328 |
| H | -1.127379 | -4.081237 | -4.077621 |
| S | 0.721120  | -0.303586 | 2.555411  |
| O | 0.993183  | -1.760973 | 2.709657  |
| O | -0.424132 | 0.134297  | 3.351867  |
| O | 1.920682  | 0.504015  | 2.709804  |
| O | 0.293244  | -0.116554 | 1.010718  |
| H | 1.929698  | 1.751477  | -1.317000 |
| H | -0.138340 | -0.953026 | 0.688836  |
| S | 5.357403  | 0.560957  | -0.048942 |
| O | 5.503180  | -0.432718 | 1.024060  |
| O | 4.121346  | 1.345273  | 0.036706  |
| O | 6.514549  | 1.640649  | 0.162971  |
| O | 5.585924  | -0.017297 | -1.390512 |
| H | 7.386649  | 1.249797  | -0.211750 |
| H | 2.704035  | -2.061244 | 2.166511  |
| S | -1.887540 | -2.995154 | 1.217140  |
| O | -0.938770 | -2.386928 | 0.243275  |
| O | -2.634536 | -4.119559 | 0.648539  |
| O | -0.962734 | -3.651743 | 2.343896  |
| O | -2.736621 | -1.993674 | 1.854328  |
| H | -0.265244 | -2.988484 | 2.585888  |
| H | -3.074605 | 0.554327  | 1.211295  |
| C | 0.442086  | 0.653479  | -2.222234 |
| N | 1.866767  | 0.871331  | -1.843557 |
| C | 2.781210  | 0.956457  | -3.016415 |
| H | -0.166131 | 0.644117  | -1.324201 |
| H | 0.365292  | -0.296487 | -2.739799 |
| H | 0.121235  | 1.469776  | -2.865340 |
| H | 2.188620  | 0.099980  | -1.226879 |
| H | 2.500046  | 1.825898  | -3.609907 |
| H | 2.675363  | 0.042483  | -3.597848 |
| H | 3.801325  | 1.049667  | -2.652801 |
| C | 4.178271  | -1.751182 | 3.567023  |
| N | 3.734118  | -2.171450 | 2.212760  |
| C | 4.110399  | -3.564808 | 1.853545  |
| H | 3.812237  | -0.742410 | 3.739342  |
| H | 5.266308  | -1.771807 | 3.602531  |

|   |           |           |          |
|---|-----------|-----------|----------|
| H | 3.756332  | -2.430519 | 4.307199 |
| H | 4.154663  | -1.515131 | 1.525661 |
| H | 3.734598  | -3.784217 | 0.855090 |
| H | 3.673789  | -4.247749 | 2.582961 |
| H | 5.196904  | -3.648793 | 1.870955 |
| C | -2.488668 | 2.341384  | 2.086911 |
| N | -2.802848 | 0.888037  | 2.150435 |
| C | -3.846248 | 0.555856  | 3.160376 |
| H | -2.021200 | 2.632513  | 3.026062 |
| H | -3.418098 | 2.886496  | 1.938754 |
| H | -1.801815 | 2.525825  | 1.264539 |
| H | -1.933952 | 0.390166  | 2.417256 |
| H | -4.784058 | 1.013214  | 2.854169 |
| H | -3.518518 | 0.941888  | 4.125427 |
| H | -3.930127 | -0.525150 | 3.207016 |

#### 8DMA

|   |           |           |           |
|---|-----------|-----------|-----------|
| C | 1.569419  | 4.385895  | -1.205176 |
| N | 1.217701  | 2.991359  | -0.955896 |
| C | 0.865601  | 2.281339  | -2.181083 |
| H | 2.488065  | 4.443157  | -1.798985 |
| H | 1.754518  | 4.894241  | -0.255852 |
| H | 0.789499  | 4.947512  | -1.748151 |
| H | 0.417478  | 2.959961  | -0.313174 |
| H | 1.739492  | 2.205282  | -2.837132 |
| H | 0.059852  | 2.768547  | -2.756896 |
| H | 0.542267  | 1.266946  | -1.935941 |
| C | 4.921695  | -2.044442 | 0.082019  |
| N | 3.667187  | -1.489492 | -0.416155 |
| C | 3.565772  | -1.564282 | -1.869967 |
| H | 4.962175  | -3.121288 | -0.114182 |
| H | 4.984426  | -1.900416 | 1.163390  |
| H | 5.817721  | -1.591323 | -0.376745 |
| H | 3.599351  | -0.506927 | -0.126772 |
| H | 3.513668  | -2.610214 | -2.191156 |
| H | 4.417780  | -1.099138 | -2.395902 |
| H | 2.650358  | -1.068187 | -2.200174 |
| C | -4.921991 | 2.044194  | 0.080540  |
| N | -3.667095 | 1.489435  | -0.416875 |
| C | -3.565001 | 1.563839  | -1.870660 |
| H | -4.962627 | 3.120998  | -0.115859 |
| H | -4.985260 | 1.900332  | 1.161902  |
| H | -5.817682 | 1.590799  | -0.378607 |
| H | -3.599157 | 0.506960  | -0.127164 |
| H | -3.512924 | 2.609688  | -2.192123 |

|   |           |           |           |
|---|-----------|-----------|-----------|
| H | -4.416680 | 1.098402  | -2.396869 |
| H | -2.649346 | 1.067809  | -2.200290 |
| C | -0.955248 | 2.284072  | 2.195775  |
| N | -1.274964 | 2.989370  | 0.959006  |
| C | -1.705435 | 4.363088  | 1.200010  |
| H | -0.075638 | 2.733069  | 2.669396  |
| H | -0.719329 | 1.241126  | 1.971630  |
| H | -1.774441 | 2.298637  | 2.935524  |
| H | -2.026502 | 2.484298  | 0.474965  |
| H | -0.879528 | 4.949582  | 1.616878  |
| H | -2.554128 | 4.443483  | 1.901276  |
| H | -2.000482 | 4.827906  | 0.256101  |
| C | -1.569899 | -4.385907 | -1.204639 |
| N | -1.217845 | -2.991261 | -0.956526 |
| C | -0.866291 | -2.282148 | -2.182392 |
| H | -2.488603 | -4.443408 | -1.798336 |
| H | -1.755108 | -4.893426 | -0.254892 |
| H | -0.790172 | -4.948187 | -1.747211 |
| H | -0.417297 | -2.959476 | -0.314222 |
| H | -1.740478 | -2.206536 | -2.838097 |
| H | -0.060820 | -2.769789 | -2.758237 |
| H | -0.542809 | -1.267583 | -1.938149 |
| C | -3.520564 | -1.693870 | 1.872596  |
| N | -3.637352 | -1.541081 | 0.425970  |
| C | -4.854098 | -2.152607 | -0.099043 |
| H | -4.316496 | -1.134983 | 2.376683  |
| H | -2.563416 | -1.288691 | 2.208544  |
| H | -3.587591 | -2.742384 | 2.211654  |
| H | -2.823417 | -1.979052 | -0.021083 |
| H | -5.735255 | -1.623862 | 0.280146  |
| H | -4.965736 | -3.216973 | 0.171386  |
| H | -4.864011 | -2.076849 | -1.189115 |
| C | 3.522211  | 1.694498  | 1.871920  |
| N | 3.638092  | 1.541499  | 0.425234  |
| C | 4.854468  | 2.153060  | -0.100617 |
| H | 4.318492  | 1.135714  | 2.375569  |
| H | 2.565299  | 1.289316  | 2.208545  |
| H | 3.589391  | 2.743067  | 2.210769  |
| H | 2.823856  | 1.979396  | -0.021340 |
| H | 5.735902  | 1.624373  | 0.278006  |
| H | 4.966228  | 3.217439  | 0.169696  |
| H | 4.863658  | 2.077254  | -1.190691 |
| C | 0.954606  | -2.284181 | 2.195556  |
| N | 1.274533  | -2.989132 | 0.958646  |



|     |           |           |           |
|-----|-----------|-----------|-----------|
| C   | 1.704563  | -4.363047 | 1.199283  |
| H   | 0.074685  | -2.733068 | 2.668703  |
| H   | 0.719108  | -1.241075 | 1.971711  |
| H   | 1.773532  | -2.299284 | 2.935592  |
| H   | 2.026305  | -2.484055 | 0.474948  |
| H   | 0.878352  | -4.949497 | 1.615609  |
| H   | 2.552969  | -4.443934 | 1.900844  |
| H   | 1.999862  | -4.827585 | 0.255313  |
| 8SA |           |           |           |
| S   | -8.073568 | -2.736853 | -0.538391 |
| O   | -7.411729 | -1.820841 | -1.435912 |
| O   | -9.471982 | -2.977728 | -0.618033 |
| O   | -7.272018 | -4.112830 | -0.739718 |
| O   | -7.747471 | -2.344969 | 0.949215  |
| H   | -7.780258 | -4.833808 | -0.337050 |
| H   | -6.833331 | -1.967100 | 1.015360  |
| S   | -4.642588 | -0.396020 | -0.013699 |
| O   | -3.216890 | -0.180740 | 0.030450  |
| O   | -5.240530 | -1.329615 | 0.907705  |
| O   | -5.394705 | 0.955058  | 0.195284  |
| O   | -4.945435 | -0.815733 | -1.489353 |
| H   | -4.921242 | 1.721954  | -0.236956 |
| H   | -5.866692 | -1.189111 | -1.557194 |
| S   | 6.045981  | -2.684439 | -1.862354 |
| O   | 6.763458  | -2.830960 | -3.072826 |
| O   | 6.246297  | -1.526018 | -0.998091 |
| O   | 4.497084  | -2.754183 | -2.203208 |
| O   | 6.305429  | -3.969592 | -0.987953 |
| H   | 3.972335  | -2.456688 | -1.427278 |
| H   | 5.833687  | -3.904758 | -0.127518 |
| S   | -2.731063 | 3.299569  | -0.628982 |
| O   | -4.121400 | 3.025665  | -0.871137 |
| O   | -2.040362 | 2.693722  | 0.472615  |
| O   | -1.981766 | 2.948457  | -1.980653 |
| O   | -2.626316 | 4.870266  | -0.533600 |
| H   | -1.023911 | 2.836366  | -1.799077 |
| H   | -1.700574 | 5.102062  | -0.299802 |
| S   | 1.062617  | 3.794830  | 0.058533  |
| O   | 0.148502  | 4.874438  | -0.162626 |
| O   | 1.197523  | 3.185746  | 1.361904  |
| O   | 0.659869  | 2.632949  | -0.971542 |
| O   | 2.434098  | 4.291964  | -0.462023 |
| H   | 0.661991  | 1.750737  | -0.512856 |
| H   | 3.197885  | 3.684339  | -0.249919 |

S 0.021669 -0.081904 1.684428  
O 0.960147 -0.890367 2.423146  
O 0.384556 0.295599 0.332872  
O -1.316540 -0.856330 1.718303  
O -0.303422 1.199969 2.522093  
H -2.013280 -0.513309 1.086946  
H 0.160751 1.990899 2.150853  
S 3.718927 -2.512421 1.390248  
O 4.599599 -3.628131 1.212968  
O 3.346634 -1.790442 0.165653  
O 2.455332 -3.031604 2.113819  
O 4.282029 -1.482284 2.416381  
H 1.804180 -2.284312 2.256207  
H 4.653443 -0.671387 1.969085  
S 4.711640 1.375546 -0.026020  
O 5.128108 0.694016 1.179411  
O 4.579374 2.804467 -0.016499  
O 5.671693 1.021619 -1.192881  
O 3.292454 0.831454 -0.462172  
H 5.959961 0.058724 -1.162092  
H 3.184255 -0.121714 -0.217629

8SA1DMA

S -4.812199 0.694431 0.057257  
O -3.448270 0.382132 -0.279807  
O -5.266375 2.053406 -0.109255  
O -5.806129 -0.205688 -0.747209  
O -5.096135 0.218153 1.536963  
H -5.390368 -1.081951 -0.954682  
H -4.259022 0.246969 2.057985  
S -2.036404 3.559866 -0.343535  
O -1.866901 2.875118 0.933885  
O -1.639257 2.825185 -1.515195  
O -3.495244 4.096108 -0.461711  
O -1.339177 4.955145 -0.283040  
H -4.152843 3.358689 -0.338466  
H -0.368921 4.818164 -0.114855  
S -3.150276 -2.844635 -0.982991  
O -2.042363 -1.987554 -1.305558  
O -4.471280 -2.551565 -1.471300  
O -2.814716 -4.306335 -1.461110  
O -3.269674 -2.987198 0.582257  
H -1.835733 -4.434947 -1.443105  
H -2.551773 -2.491223 1.049732  
S 0.788183 -3.434698 -0.560827

|   |           |           |           |
|---|-----------|-----------|-----------|
| O | 0.049391  | -4.349960 | -1.386130 |
| O | 0.854793  | -2.036413 | -0.901267 |
| O | 0.265327  | -3.592560 | 0.921482  |
| O | 2.242349  | -4.019248 | -0.447184 |
| H | -0.037357 | -2.734696 | 1.297563  |
| H | 2.793264  | -3.380721 | 0.069564  |
| S | 1.926638  | 3.086237  | 0.061748  |
| O | 1.265172  | 4.356799  | 0.187387  |
| O | 1.230722  | 1.968012  | -0.521147 |
| O | 3.248673  | 3.354607  | -0.736192 |
| O | 2.398010  | 2.713243  | 1.515899  |
| H | 3.613610  | 2.502060  | -1.105609 |
| H | 2.759667  | 1.791164  | 1.560736  |
| S | -1.373822 | -0.286237 | 2.345613  |
| O | -2.623293 | 0.219495  | 2.839120  |
| O | -1.327677 | -1.677811 | 1.909261  |
| O | -0.830479 | 0.548654  | 1.161022  |
| O | -0.322037 | -0.094006 | 3.483448  |
| H | -1.240962 | 1.476410  | 1.096729  |
| H | 0.560345  | -0.434701 | 3.176412  |
| S | 5.401551  | 0.337497  | -1.371718 |
| O | 4.116502  | 0.995366  | -1.576491 |
| O | 6.482787  | 0.577561  | -2.254924 |
| O | 5.877778  | 0.671179  | 0.101671  |
| O | 5.142276  | -1.217469 | -1.340860 |
| H | 5.103729  | 0.630318  | 0.718880  |
| H | 4.505402  | -1.458941 | -0.623236 |
| S | 3.203504  | -1.064176 | 1.895603  |
| O | 1.809534  | -1.161798 | 2.268580  |
| O | 3.672794  | 0.316171  | 1.639802  |
| O | 3.967599  | -1.574433 | 3.212867  |
| O | 3.618506  | -1.964206 | 0.801564  |
| H | 4.915494  | -1.659569 | 3.030238  |
| H | -0.349686 | 1.075787  | -1.715733 |
| C | -1.536711 | 0.299081  | -3.221418 |
| N | -0.339215 | 0.252276  | -2.330580 |
| C | 0.960194  | 0.212401  | -3.066488 |
| H | -2.423956 | 0.307753  | -2.596790 |
| H | -1.530385 | -0.584681 | -3.856285 |
| H | -1.485680 | 1.206127  | -3.820045 |
| H | -0.398385 | -0.573447 | -1.719457 |
| H | 1.773718  | 0.196878  | -2.347809 |
| H | 1.031902  | 1.101380  | -3.691145 |
| H | 0.981124  | -0.684920 | -3.682158 |

## 8SA2DMA

|   |           |           |           |
|---|-----------|-----------|-----------|
| S | 6.145853  | -2.504804 | 0.165916  |
| O | 4.882246  | -2.224153 | -0.509844 |
| O | 6.921887  | -3.611464 | -0.268221 |
| O | 6.996454  | -1.165303 | 0.174687  |
| O | 5.880327  | -2.680289 | 1.695465  |
| H | 6.778751  | -0.592648 | -0.597062 |
| H | 5.292428  | -1.961897 | 2.042956  |
| S | -4.506540 | -3.149969 | -2.154918 |
| O | -4.635329 | -4.218926 | -3.076382 |
| O | -5.084291 | -1.843045 | -2.421193 |
| O | -5.066010 | -3.660048 | -0.771890 |
| O | -2.959256 | -2.917763 | -1.861277 |
| H | -5.098669 | -2.919821 | -0.124827 |
| H | -2.783168 | -1.947478 | -1.735048 |
| S | 4.689724  | 0.977933  | -1.651648 |
| O | 4.291525  | 1.705865  | -0.466232 |
| O | 6.067384  | 0.578084  | -1.773356 |
| O | 3.769297  | -0.287155 | -1.824833 |
| O | 4.310129  | 1.807063  | -2.908324 |
| H | 4.191198  | -1.062303 | -1.345832 |
| H | 3.475151  | 2.329415  | -2.750846 |
| S | 3.045707  | -0.086224 | 2.319757  |
| O | 2.245395  | -0.721483 | 1.297008  |
| O | 4.314383  | -0.689540 | 2.638052  |
| O | 3.232970  | 1.433954  | 1.960132  |
| O | 2.265501  | 0.045033  | 3.651892  |
| H | 3.628454  | 1.527780  | 1.054086  |
| H | 1.372969  | 0.485877  | 3.524125  |
| S | -4.207436 | -1.525771 | 2.389622  |
| O | -4.871453 | -2.608365 | 3.018708  |
| O | -4.227963 | -0.188306 | 2.948267  |
| O | -2.709290 | -1.938809 | 2.147969  |
| O | -4.801570 | -1.426227 | 0.906915  |
| H | -2.147708 | -1.128822 | 1.959466  |
| H | -4.573525 | -0.549348 | 0.468178  |
| S | -3.252622 | 0.775671  | -1.487912 |
| O | -2.320207 | -0.364017 | -1.501901 |
| O | -4.128978 | 0.787446  | -0.308967 |
| O | -2.585214 | 2.080770  | -1.651825 |
| O | -4.151159 | 0.665064  | -2.783946 |
| H | -1.183275 | 2.503809  | -2.395054 |
| H | -4.582276 | -0.225807 | -2.794847 |
| S | -1.020239 | 1.382288  | 2.318357  |

|         |           |           |           |
|---------|-----------|-----------|-----------|
| O       | -0.063471 | 1.225676  | 3.399841  |
| O       | -1.264228 | 0.148857  | 1.549226  |
| O       | -2.418739 | 1.812343  | 2.966590  |
| O       | -0.746384 | 2.543605  | 1.446674  |
| H       | -3.021410 | 1.036479  | 3.074184  |
| H       | 0.247469  | 3.016691  | 0.228066  |
| S       | 0.867135  | 2.609236  | -1.792497 |
| O       | 0.631414  | 3.531701  | -0.538082 |
| O       | 2.022614  | 3.121769  | -2.480223 |
| O       | 0.827992  | 1.233379  | -1.372265 |
| O       | -0.343416 | 2.925664  | -2.735497 |
| H       | 1.077897  | -0.937132 | -0.203324 |
| H       | -3.028472 | 3.274560  | -0.359896 |
| C       | 0.677091  | -1.827377 | -2.046373 |
| N       | 0.315870  | -1.471813 | -0.641431 |
| C       | 0.023597  | -2.658800 | 0.217004  |
| H       | 0.871626  | -0.908828 | -2.591039 |
| H       | -0.152966 | -2.373412 | -2.491298 |
| H       | 1.569768  | -2.450066 | -2.029116 |
| H       | -0.494447 | -0.837605 | -0.655348 |
| H       | 0.890789  | -3.316361 | 0.201417  |
| H       | -0.852345 | -3.173141 | -0.174256 |
| H       | -0.154812 | -2.314729 | 1.230965  |
| C       | -2.545597 | 5.241996  | 0.102709  |
| N       | -3.021444 | 3.880493  | 0.481843  |
| C       | -4.358136 | 3.841453  | 1.141468  |
| H       | -3.247176 | 5.681931  | -0.604675 |
| H       | -1.561330 | 5.150585  | -0.354113 |
| H       | -2.481716 | 5.858853  | 0.998005  |
| H       | -2.305929 | 3.436103  | 1.086636  |
| H       | -5.092260 | 4.297174  | 0.478090  |
| H       | -4.306574 | 4.389146  | 2.080961  |
| H       | -4.616978 | 2.801821  | 1.323552  |
| 8SA3DMA |           |           |           |
| S       | -5.678879 | -1.346404 | -1.006692 |
| O       | -5.747784 | -0.060190 | -0.335083 |
| O       | -6.863910 | -2.043314 | -1.353881 |
| O       | -4.818800 | -1.197387 | -2.312528 |
| O       | -4.810564 | -2.318384 | -0.094392 |
| H       | -4.088702 | -0.525095 | -2.209898 |
| H       | -4.196983 | -1.817778 | 0.497530  |
| S       | -2.852666 | -0.720937 | 2.732601  |
| O       | -2.810590 | -1.296903 | 1.379902  |
| O       | -4.026450 | -0.987405 | 3.493141  |

|   |           |           |           |
|---|-----------|-----------|-----------|
| O | -1.606073 | -1.163992 | 3.534126  |
| O | -2.550379 | 0.824544  | 2.591418  |
| H | -0.739283 | -0.677737 | 3.306705  |
| H | -3.155974 | 1.227937  | 1.918423  |
| S | 2.709789  | -3.851976 | 0.104933  |
| O | 3.960214  | -3.195923 | -0.213523 |
| O | 2.591379  | -5.269454 | 0.064729  |
| O | 2.229999  | -3.401457 | 1.533413  |
| O | 1.588443  | -3.234688 | -0.839676 |
| H | 2.384212  | -2.418248 | 1.685117  |
| H | 1.933216  | -2.498330 | -1.439610 |
| S | 4.589690  | 3.079776  | 0.545977  |
| O | 5.329985  | 1.851935  | 0.768887  |
| O | 5.268957  | 4.325277  | 0.477426  |
| O | 3.720005  | 2.895436  | -0.759426 |
| O | 3.492889  | 3.226177  | 1.678260  |
| H | 3.662180  | 1.931307  | -1.035799 |
| H | 2.906057  | 2.423180  | 1.698655  |
| S | -4.077260 | 3.239503  | -0.002577 |
| O | -5.182286 | 4.094490  | 0.254758  |
| O | -2.749612 | 3.643643  | 0.404549  |
| O | -4.261612 | 1.815614  | 0.730656  |
| O | -4.110593 | 2.849864  | -1.512441 |
| H | -4.935342 | 1.215411  | 0.305815  |
| H | -3.530422 | 2.050441  | -1.722985 |
| S | -1.484999 | 0.230303  | -1.862332 |
| O | -2.908700 | 0.630661  | -2.017659 |
| O | -1.315683 | -1.205732 | -1.779980 |
| O | -0.833901 | 0.781969  | -3.191411 |
| O | -0.841500 | 0.950912  | -0.738664 |
| H | 0.160527  | 0.728782  | -3.142413 |
| H | -0.036934 | -0.032424 | 0.216145  |
| S | 2.813697  | -0.068350 | -2.609802 |
| O | 2.306554  | -1.436831 | -2.529794 |
| O | 1.807401  | 0.906039  | -3.026641 |
| O | 3.592902  | 0.353150  | -1.439462 |
| O | 3.950131  | -0.082835 | -3.766043 |
| H | 5.153436  | 0.089753  | 0.459835  |
| H | 3.531878  | -0.332693 | -4.602929 |
| S | 1.389541  | -0.008439 | 1.870457  |
| O | 0.471284  | -0.701517 | 0.775837  |
| O | 0.640387  | -0.026489 | 3.126719  |
| O | 2.601461  | -0.839175 | 1.903470  |
| O | 1.655281  | 1.363076  | 1.388958  |

|         |           |           |           |
|---------|-----------|-----------|-----------|
| H       | -0.244557 | -3.163208 | -0.273763 |
| H       | 0.554007  | 2.619861  | 0.512342  |
| C       | -1.944097 | -4.101922 | -1.002113 |
| N       | -1.190305 | -3.384195 | 0.071190  |
| C       | -1.085028 | -4.144608 | 1.350655  |
| H       | -1.940883 | -3.476678 | -1.890273 |
| H       | -2.966748 | -4.260731 | -0.664882 |
| H       | -1.449359 | -5.052615 | -1.194967 |
| H       | -1.636918 | -2.477411 | 0.258119  |
| H       | -0.532488 | -5.064771 | 1.168642  |
| H       | -2.088767 | -4.366533 | 1.708311  |
| H       | -0.555911 | -3.535050 | 2.077950  |
| C       | 0.224241  | 4.481090  | 1.355556  |
| N       | 0.045712  | 3.481638  | 0.262963  |
| C       | 0.488441  | 3.951961  | -1.083359 |
| H       | -0.134672 | 4.042256  | 2.284757  |
| H       | -0.361302 | 5.367200  | 1.118369  |
| H       | 1.281444  | 4.725103  | 1.442921  |
| H       | -0.952496 | 3.228101  | 0.210890  |
| H       | 0.319067  | 3.147660  | -1.794637 |
| H       | 1.549042  | 4.190652  | -1.044942 |
| H       | -0.098438 | 4.828258  | -1.354396 |
| C       | 6.500775  | -1.021773 | -0.638141 |
| N       | 5.457554  | -0.895350 | 0.417654  |
| C       | 5.895370  | -1.320584 | 1.775878  |
| H       | 6.075929  | -0.672398 | -1.576449 |
| H       | 6.792322  | -2.067383 | -0.722814 |
| H       | 7.356178  | -0.406840 | -0.362704 |
| H       | 4.644364  | -1.459884 | 0.139605  |
| H       | 6.740322  | -0.705741 | 2.081802  |
| H       | 6.178677  | -2.371345 | 1.742773  |
| H       | 5.061095  | -1.177168 | 2.459047  |
| 8SA4DMA |           |           |           |
| S       | 0.509116  | -4.201408 | -3.187172 |
| O       | 0.587875  | -5.117679 | -4.270526 |
| O       | 0.657473  | -4.633768 | -1.812547 |
| O       | 1.584008  | -3.062607 | -3.453119 |
| O       | -0.873724 | -3.444191 | -3.323298 |
| H       | 1.884261  | -2.664426 | -2.596397 |
| H       | -1.147841 | -3.029794 | -2.462056 |
| S       | 3.220746  | -1.698052 | 3.830478  |
| O       | 3.795551  | -2.285067 | 4.991043  |
| O       | 2.233146  | -2.423740 | 3.053709  |
| O       | 2.604304  | -0.319372 | 4.281877  |

|   |           |           |           |
|---|-----------|-----------|-----------|
| O | 4.377271  | -1.250191 | 2.849134  |
| H | 1.979048  | 0.062357  | 3.611208  |
| H | 4.243622  | -1.598628 | 1.918449  |
| S | -1.033143 | 4.695017  | -0.331193 |
| O | -1.705616 | 3.509794  | -0.851949 |
| O | -1.813778 | 5.855623  | -0.052424 |
| O | -0.228265 | 4.252441  | 0.954097  |
| O | 0.115834  | 5.118861  | -1.299084 |
| H | -0.562686 | 3.364393  | 1.305518  |
| H | 0.656561  | 4.327643  | -1.600699 |
| S | -6.196609 | -1.132464 | 1.412316  |
| O | -5.570365 | 0.146080  | 1.121517  |
| O | -7.424876 | -1.181749 | 2.122032  |
| O | -6.394863 | -1.910483 | 0.057530  |
| O | -5.142150 | -2.011946 | 2.205798  |
| H | -5.533624 | -1.950408 | -0.439701 |
| H | -4.241368 | -1.864596 | 1.830789  |
| S | 2.824302  | 2.718459  | -2.296104 |
| O | 1.380245  | 2.980784  | -2.127496 |
| O | 3.087231  | 1.388564  | -2.841807 |
| O | 3.200579  | 3.779717  | -3.458606 |
| O | 3.628596  | 3.071785  | -1.131864 |
| H | 4.144762  | 3.693550  | -3.655797 |
| H | 3.439248  | 2.600031  | 0.593277  |
| C | 4.618356  | 2.120875  | 2.237761  |
| N | 3.370443  | 2.661333  | 1.626108  |
| C | 3.068116  | 4.075207  | 1.990615  |
| H | 4.725389  | 1.081029  | 1.942384  |
| H | 4.537266  | 2.182603  | 3.321984  |
| H | 5.465258  | 2.709165  | 1.887300  |
| H | 2.571858  | 2.066194  | 1.909985  |
| H | 2.141148  | 4.371982  | 1.503785  |
| H | 3.886559  | 4.708757  | 1.652477  |
| H | 2.958361  | 4.145891  | 3.071977  |
| S | -2.724561 | -1.426096 | -0.670435 |
| O | -3.968013 | -2.077518 | -1.049557 |
| O | -2.681665 | 0.017513  | -0.961534 |
| O | -2.735847 | -1.544082 | 0.956421  |
| O | -1.509736 | -2.119474 | -1.103192 |
| H | -1.940362 | -1.088294 | 1.356262  |
| H | -1.317707 | 0.707536  | -1.946377 |
| S | -0.061949 | 0.875158  | 1.783908  |
| O | 0.417838  | 0.907616  | 0.265485  |
| O | -0.625818 | -0.438795 | 2.070318  |



|         |           |           |           |
|---------|-----------|-----------|-----------|
| O       | 1.151363  | 1.148593  | 2.587504  |
| O       | -1.048384 | 1.964375  | 1.845553  |
| H       | 1.519198  | -3.233629 | 1.615855  |
| H       | -2.986847 | 2.419464  | 0.132152  |
| S       | 3.290380  | -1.185233 | -0.501171 |
| O       | 2.146197  | -1.899403 | -1.101688 |
| O       | 4.101509  | -2.044046 | 0.358653  |
| O       | 4.255882  | -0.740103 | -1.670556 |
| O       | 2.847059  | 0.051234  | 0.177910  |
| H       | 3.870246  | 0.053980  | -2.127298 |
| H       | 1.325154  | 0.477893  | 0.188331  |
| C       | 2.281032  | -4.982543 | 0.844285  |
| N       | 1.236021  | -3.917692 | 0.898031  |
| C       | -0.137766 | -4.414964 | 1.198690  |
| H       | 3.234712  | -4.504425 | 0.629437  |
| H       | 2.019847  | -5.679433 | 0.051926  |
| H       | 2.320520  | -5.482163 | 1.811067  |
| H       | 1.233922  | -3.427497 | -0.005971 |
| H       | -0.134222 | -4.872471 | 2.186995  |
| H       | -0.416454 | -5.134915 | 0.433567  |
| H       | -0.823521 | -3.571481 | 1.173209  |
| C       | 0.067180  | -0.092083 | -3.274911 |
| N       | -0.675442 | 1.059248  | -2.681985 |
| C       | -1.454329 | 1.847459  | -3.676174 |
| H       | 0.548739  | -0.636831 | -2.468964 |
| H       | 0.818544  | 0.290076  | -3.962767 |
| H       | -0.633460 | -0.744303 | -3.791594 |
| H       | 0.003724  | 1.689213  | -2.229288 |
| H       | -1.921432 | 2.682717  | -3.159930 |
| H       | -2.208044 | 1.202096  | -4.125041 |
| H       | -0.774419 | 2.217229  | -4.442373 |
| C       | -4.153567 | 2.962001  | 1.761074  |
| N       | -3.948777 | 2.261598  | 0.460689  |
| C       | -4.891192 | 2.684146  | -0.613423 |
| H       | -3.395248 | 2.610783  | 2.457111  |
| H       | -5.148659 | 2.720049  | 2.127935  |
| H       | -4.049177 | 4.034948  | 1.603156  |
| H       | -4.074078 | 1.251635  | 0.601647  |
| H       | -4.678709 | 2.090896  | -1.500086 |
| H       | -4.738931 | 3.742247  | -0.818550 |
| H       | -5.907236 | 2.490716  | -0.277001 |
| 8SA5DMA |           |           |           |
| S       | 2.771683  | -3.383138 | 2.226288  |
| O       | 2.891905  | -4.560200 | 3.016014  |

|   |           |           |           |
|---|-----------|-----------|-----------|
| O | 3.798644  | -3.011408 | 1.278904  |
| O | 1.394064  | -3.476506 | 1.440245  |
| O | 2.543217  | -2.184209 | 3.226974  |
| H | 1.390329  | -2.916393 | 0.617671  |
| H | 2.438722  | -1.311033 | 2.741753  |
| S | -6.256805 | -0.072834 | -2.031572 |
| O | -6.043781 | 0.999191  | -1.073762 |
| O | -7.431293 | -0.079178 | -2.833544 |
| O | -5.031958 | -0.137411 | -3.018453 |
| O | -6.150406 | -1.442852 | -1.251224 |
| H | -4.164914 | -0.139274 | -2.517799 |
| H | -5.878977 | -1.303478 | -0.296323 |
| S | -1.054666 | 3.947502  | 1.426461  |
| O | -1.526742 | 5.256203  | 1.750478  |
| O | -1.844974 | 2.806216  | 1.870561  |
| O | -0.852105 | 3.812325  | -0.132747 |
| O | 0.406144  | 3.827146  | 1.971226  |
| H | -1.376120 | 3.027295  | -0.491116 |
| H | 0.952516  | 3.116112  | 1.507222  |
| S | -4.055694 | -1.358982 | 1.734032  |
| O | -3.315836 | -2.390936 | 1.012490  |
| O | -3.331995 | -0.109115 | 1.952652  |
| O | -5.427899 | -1.161995 | 1.250710  |
| O | -4.220521 | -1.912464 | 3.267814  |
| H | -4.941431 | 1.702666  | 0.163519  |
| H | -4.782369 | -2.699728 | 3.239970  |
| C | -4.613791 | 3.735670  | 0.133076  |
| N | -4.591723 | 2.415202  | 0.825342  |
| C | -5.415892 | 2.369035  | 2.064371  |
| H | -4.029604 | 3.648595  | -0.778956 |
| H | -4.180493 | 4.489245  | 0.789004  |
| H | -5.645691 | 3.983075  | -0.110016 |
| H | -3.618872 | 2.171239  | 1.055060  |
| H | -5.345716 | 1.367670  | 2.478432  |
| H | -6.448425 | 2.597702  | 1.804982  |
| H | -5.028911 | 3.102441  | 2.770287  |
| S | 2.666098  | 0.931191  | 1.144291  |
| O | 3.240214  | 0.202290  | 0.019023  |
| O | 1.899322  | 0.072026  | 2.085312  |
| O | 3.863670  | 1.457077  | 2.038754  |
| O | 1.863269  | 2.085565  | 0.716992  |
| H | 4.665120  | 1.636745  | 1.468817  |
| H | -1.553746 | 0.147023  | 2.420681  |
| C | -0.754539 | 0.878290  | 4.194921  |

|   |           |           |           |
|---|-----------|-----------|-----------|
| N | -0.733103 | -0.039635 | 3.021644  |
| C | -0.762685 | -1.483424 | 3.398547  |
| H | -0.740286 | 1.900916  | 3.830078  |
| H | 0.120183  | 0.677967  | 4.811831  |
| H | -1.666787 | 0.698062  | 4.761672  |
| H | 0.127194  | 0.142080  | 2.475164  |
| H | -0.742079 | -2.080573 | 2.490741  |
| H | -1.683089 | -1.681309 | 3.943847  |
| H | 0.111301  | -1.711309 | 4.004747  |
| S | 1.204818  | -2.049703 | -2.281951 |
| O | 1.262841  | -0.621681 | -2.681821 |
| O | 0.043519  | -2.727513 | -2.861591 |
| O | 2.459149  | -2.749351 | -2.353842 |
| O | 0.861298  | -1.982189 | -0.662329 |
| H | 4.585949  | -1.529265 | -0.035821 |
| H | 0.281352  | -1.193042 | -0.493147 |
| S | 6.070378  | 1.982481  | -0.869942 |
| O | 5.036595  | 2.942838  | -1.263116 |
| O | 6.122407  | 0.788921  | -1.714467 |
| O | 7.498647  | 2.686983  | -1.178462 |
| O | 6.070010  | 1.696024  | 0.573220  |
| H | 7.558602  | 3.483331  | -0.631402 |
| H | 2.453885  | 1.004229  | -2.048172 |
| S | -1.747582 | 0.561960  | -1.360990 |
| O | -0.814025 | 0.057747  | -0.346317 |
| O | -2.319749 | 1.875566  | -1.035518 |
| O | -0.910191 | 0.833765  | -2.683842 |
| O | -2.789583 | -0.423833 | -1.695054 |
| H | -0.137797 | 0.196237  | -2.746654 |
| H | -2.535453 | -2.635049 | -0.725468 |
| C | 6.524734  | -1.644510 | 0.666221  |
| N | 5.527022  | -1.603684 | -0.440774 |
| C | 5.573642  | -2.783115 | -1.349715 |
| H | 6.449836  | -0.714386 | 1.225195  |
| H | 7.520709  | -1.728213 | 0.232668  |
| H | 6.303969  | -2.498245 | 1.302025  |
| H | 5.683603  | -0.726342 | -0.978247 |
| H | 5.435590  | -3.683057 | -0.754181 |
| H | 6.540386  | -2.798332 | -1.852200 |
| H | 4.760107  | -2.700812 | -2.067208 |
| C | 3.373728  | 1.489280  | -3.828163 |
| N | 2.816394  | 1.856225  | -2.496757 |
| C | 1.754615  | 2.902655  | -2.537030 |
| H | 4.203351  | 0.803042  | -3.671604 |

|         |           |           |           |
|---------|-----------|-----------|-----------|
| H       | 3.736972  | 2.393525  | -4.314532 |
| H       | 2.595051  | 1.014397  | -4.420789 |
| H       | 3.600316  | 2.207153  | -1.908586 |
| H       | 1.422428  | 3.089081  | -1.518606 |
| H       | 0.920974  | 2.551429  | -3.141268 |
| H       | 2.182194  | 3.809153  | -2.963847 |
| C       | -1.814886 | -4.569529 | -0.701506 |
| N       | -2.245121 | -3.339239 | -1.421491 |
| C       | -3.368792 | -3.553997 | -2.376383 |
| H       | -0.974063 | -4.321540 | -0.057160 |
| H       | -1.507824 | -5.315663 | -1.432860 |
| H       | -2.645049 | -4.936362 | -0.101390 |
| H       | -1.424480 | -2.967804 | -1.944507 |
| H       | -4.240384 | -3.906566 | -1.827791 |
| H       | -3.061566 | -4.287924 | -3.120096 |
| H       | -3.600151 | -2.606910 | -2.855484 |
| 8SA6DMA |           |           |           |
| S       | 4.524264  | -2.350230 | 2.183635  |
| O       | 3.864129  | -3.110008 | 3.202987  |
| O       | 5.677761  | -2.889928 | 1.503111  |
| O       | 3.395514  | -2.020979 | 1.119875  |
| O       | 4.974972  | -0.946183 | 2.711461  |
| H       | 3.753109  | -1.516795 | 0.324779  |
| H       | 4.202983  | -0.410235 | 3.095241  |
| S       | -2.859434 | -4.105599 | -1.909842 |
| O       | -2.928421 | -5.442656 | -2.391988 |
| O       | -3.973351 | -3.200611 | -2.115320 |
| O       | -2.532772 | -4.117006 | -0.359205 |
| O       | -1.548843 | -3.481110 | -2.524739 |
| H       | -3.145547 | -3.498485 | 0.130742  |
| H       | -1.355405 | -2.562327 | -2.184896 |
| S       | -4.193132 | -1.756315 | 2.105253  |
| O       | -2.909044 | -1.703675 | 2.799188  |
| O       | -4.911321 | -0.481749 | 2.069795  |
| O       | -4.170514 | -2.427003 | 0.801238  |
| O       | -5.132073 | -2.765747 | 2.970116  |
| H       | -5.001804 | -1.817666 | -1.099456 |
| H       | -5.156955 | -2.443206 | 3.882162  |
| C       | -5.867203 | -0.989343 | -2.782521 |
| N       | -5.732814 | -1.119525 | -1.304158 |
| C       | -6.987779 | -1.506517 | -0.602137 |
| H       | -4.889130 | -0.746594 | -3.190260 |
| H       | -6.581495 | -0.196943 | -3.001876 |
| H       | -6.202475 | -1.940296 | -3.190696 |

|   |           |           |           |
|---|-----------|-----------|-----------|
| H | -5.393995 | -0.216171 | -0.927518 |
| H | -6.794519 | -1.506636 | 0.467379  |
| H | -7.284477 | -2.501070 | -0.931390 |
| H | -7.764999 | -0.782071 | -0.843076 |
| S | 5.427676  | -1.457375 | -1.856414 |
| O | 5.080030  | -1.672161 | -3.244440 |
| O | 6.605397  | -0.669740 | -1.560591 |
| O | 4.221074  | -0.890482 | -1.100760 |
| O | 5.613385  | -2.931228 | -1.262753 |
| H | 2.805829  | -1.125290 | -2.123915 |
| H | 5.812626  | -2.898227 | -0.298827 |
| C | 2.157259  | -0.322876 | -3.920180 |
| N | 2.026659  | -1.296298 | -2.799312 |
| C | 2.069089  | -2.724645 | -3.231185 |
| H | 2.092792  | 0.684525  | -3.511165 |
| H | 1.346465  | -0.487438 | -4.629216 |
| H | 3.124574  | -0.479359 | -4.393009 |
| H | 1.128736  | -1.131066 | -2.309355 |
| H | 2.004298  | -3.355293 | -2.346038 |
| H | 3.014800  | -2.901309 | -3.737535 |
| H | 1.220287  | -2.924544 | -3.883827 |
| S | 2.237776  | 1.087722  | 2.406752  |
| O | 3.015672  | 0.536640  | 3.522678  |
| O | 0.826009  | 0.609756  | 2.445001  |
| O | 2.154476  | 2.655505  | 2.714772  |
| O | 2.852932  | 0.928800  | 1.100375  |
| H | 1.851464  | 3.101717  | 1.875421  |
| H | 4.190452  | 2.547618  | -0.353780 |
| C | 5.499722  | 2.348902  | -1.922362 |
| N | 4.957670  | 1.906423  | -0.607325 |
| C | 5.973973  | 1.869301  | 0.482345  |
| H | 4.683254  | 2.355024  | -2.641470 |
| H | 6.277540  | 1.653542  | -2.228705 |
| H | 5.889676  | 3.359695  | -1.815307 |
| H | 4.545356  | 0.962014  | -0.699611 |
| H | 5.486790  | 1.518994  | 1.388297  |
| H | 6.371063  | 2.873446  | 0.627146  |
| H | 6.760230  | 1.176103  | 0.191277  |
| S | -1.217188 | 0.042432  | -1.154690 |
| O | -0.570175 | -1.175280 | -1.720006 |
| O | -0.531895 | 1.258989  | -1.607871 |
| O | -2.636020 | 0.030400  | -1.897229 |
| O | -1.451462 | -0.041145 | 0.274654  |
| H | -3.267659 | 0.650503  | -1.439928 |

|   |           |           |           |
|---|-----------|-----------|-----------|
| H | -1.122504 | -1.853189 | 2.318761  |
| S | 1.798921  | 3.846080  | -0.779800 |
| O | 3.203648  | 4.179307  | -0.615882 |
| O | 1.068142  | 3.628777  | 0.488327  |
| O | 1.038484  | 4.735616  | -1.669256 |
| O | 1.864336  | 2.407210  | -1.515596 |
| H | -0.523856 | 1.707777  | 2.329761  |
| H | 0.996472  | 1.943836  | -1.421214 |
| S | -4.425101 | 2.583883  | 0.049672  |
| O | -4.617177 | 1.391728  | -0.825260 |
| O | -5.160581 | 3.752011  | -0.352390 |
| O | -4.989613 | 2.156525  | 1.482311  |
| O | -2.972286 | 2.830525  | 0.236351  |
| H | -4.882859 | 1.185546  | 1.633509  |
| H | -1.993961 | 3.787879  | -0.930035 |
| C | 0.365741  | -2.438359 | 3.642043  |
| N | -0.101513 | -2.003250 | 2.293882  |
| C | 0.224293  | -2.973036 | 1.208746  |
| H | 0.149051  | -1.645737 | 4.355149  |
| H | 1.439498  | -2.617265 | 3.604678  |
| H | -0.160612 | -3.350416 | 3.920567  |
| H | 0.315277  | -1.070620 | 2.098834  |
| H | -0.271084 | -3.919331 | 1.420096  |
| H | 1.303675  | -3.100117 | 1.175333  |
| H | -0.144381 | -2.571055 | 0.269074  |
| C | -2.197591 | 1.546642  | 3.530383  |
| N | -1.398216 | 2.253503  | 2.492937  |
| C | -1.063957 | 3.657389  | 2.860734  |
| H | -2.408858 | 0.535989  | 3.189269  |
| H | -3.131275 | 2.085897  | 3.684449  |
| H | -1.620917 | 1.517406  | 4.454310  |
| H | -1.927953 | 2.263980  | 1.603386  |
| H | -0.503097 | 4.102758  | 2.043002  |
| H | -0.451545 | 3.650190  | 3.761039  |
| H | -1.990959 | 4.202746  | 3.034937  |
| C | -2.038090 | 3.898846  | -2.987734 |
| N | -1.680254 | 4.459363  | -1.655623 |
| C | -2.304975 | 5.777168  | -1.359876 |
| H | -1.579392 | 2.915693  | -3.070646 |
| H | -1.658992 | 4.562032  | -3.764433 |
| H | -3.122226 | 3.815364  | -3.059438 |
| H | -0.634064 | 4.545899  | -1.599009 |
| H | -3.385453 | 5.651744  | -1.300936 |
| H | -2.037751 | 6.484002  | -2.144486 |

|         |           |           |           |
|---------|-----------|-----------|-----------|
| H       | -1.923529 | 6.134155  | -0.404583 |
| 8SA7DMA |           |           |           |
| S       | 5.645702  | -2.874374 | 2.672897  |
| O       | 4.533566  | -3.029563 | 1.765446  |
| O       | 5.863306  | -3.787560 | 3.741911  |
| O       | 6.985668  | -2.813883 | 1.825528  |
| O       | 5.562852  | -1.419347 | 3.317364  |
| H       | 6.859100  | -2.204462 | 1.052336  |
| H       | 5.426768  | -0.747980 | 2.597083  |
| S       | 2.784306  | 3.730042  | -0.694773 |
| O       | 1.520230  | 3.871784  | 0.031687  |
| O       | 3.698756  | 4.866091  | -0.514989 |
| O       | 3.458659  | 2.446666  | -0.391597 |
| O       | 2.469624  | 3.748456  | -2.251194 |
| H       | 6.246211  | 3.026958  | -0.089872 |
| H       | 1.820817  | 3.022392  | -2.474192 |
| C       | 6.331483  | 4.206768  | 1.594254  |
| N       | 6.177958  | 4.045228  | 0.126591  |
| C       | 7.176124  | 4.783906  | -0.685382 |
| H       | 5.576696  | 3.593942  | 2.083284  |
| H       | 6.190053  | 5.253715  | 1.861236  |
| H       | 7.323025  | 3.869861  | 1.895499  |
| H       | 5.207266  | 4.355042  | -0.149539 |
| H       | 6.966154  | 4.605520  | -1.738793 |
| H       | 8.177330  | 4.426489  | -0.445830 |
| H       | 7.097310  | 5.850219  | -0.474353 |
| S       | -5.796927 | 3.041851  | 0.147108  |
| O       | -4.857012 | 3.280115  | -0.933413 |
| O       | -6.606026 | 1.818107  | -0.009531 |
| O       | -5.257450 | 3.160491  | 1.506604  |
| O       | -6.870177 | 4.274495  | 0.104933  |
| H       | -5.846838 | 1.836403  | 2.417391  |
| H       | -7.124352 | 4.403555  | -0.819213 |
| C       | -5.626244 | 0.714344  | 4.166014  |
| N       | -6.314584 | 1.023307  | 2.883942  |
| C       | -7.764442 | 1.328589  | 3.014040  |
| H       | -4.582946 | 0.492617  | 3.948961  |
| H       | -6.101498 | -0.150574 | 4.628543  |
| H       | -5.702576 | 1.577169  | 4.827417  |
| H       | -6.198079 | 0.228842  | 2.225385  |
| H       | -8.150552 | 1.541308  | 2.019683  |
| H       | -7.889754 | 2.199663  | 3.656335  |
| H       | -8.276505 | 0.468426  | 3.444620  |
| S       | 5.844709  | 0.223373  | 0.020743  |

|   |           |           |           |
|---|-----------|-----------|-----------|
| O | 6.659390  | 1.394143  | -0.294858 |
| O | 6.529086  | -1.051058 | -0.158151 |
| O | 5.161292  | 0.345157  | 1.333996  |
| O | 4.658837  | 0.154852  | -1.070424 |
| H | 3.221832  | 0.398849  | 1.315194  |
| H | 4.141688  | 1.003412  | -1.041657 |
| C | 1.994556  | -0.974751 | 2.274187  |
| N | 2.235087  | 0.339469  | 1.606661  |
| C | 1.935097  | 1.507060  | 2.483444  |
| H | 2.242988  | -1.776872 | 1.585092  |
| H | 0.943637  | -1.019420 | 2.550267  |
| H | 2.633239  | -1.040916 | 3.153407  |
| H | 1.656535  | 0.408300  | 0.743261  |
| H | 2.050705  | 2.414548  | 1.896246  |
| H | 2.629569  | 1.498615  | 3.323576  |
| H | 0.910329  | 1.408590  | 2.832892  |
| S | 0.830015  | 0.540765  | -2.105721 |
| O | 0.695312  | 1.843542  | -2.771776 |
| O | 0.593271  | 0.631140  | -0.656753 |
| O | -0.430755 | -0.272532 | -2.720111 |
| O | 2.023345  | -0.215145 | -2.458681 |
| H | -0.342263 | -1.256783 | -2.546445 |
| H | 2.762860  | -2.932513 | -2.029352 |
| C | 4.716342  | -3.407530 | -1.548451 |
| N | 3.705430  | -2.517333 | -2.188514 |
| C | 3.892725  | -2.339765 | -3.654997 |
| H | 4.494314  | -3.487303 | -0.486282 |
| H | 5.704622  | -2.972048 | -1.679994 |
| H | 4.653991  | -4.387779 | -2.019228 |
| H | 3.714545  | -1.586599 | -1.751450 |
| H | 3.129963  | -1.650907 | -4.007959 |
| H | 3.790634  | -3.310257 | -4.138774 |
| H | 4.884651  | -1.928071 | -3.837178 |
| S | -2.038693 | -0.275714 | 1.220583  |
| O | -1.068183 | 0.389285  | 2.071581  |
| O | -1.663572 | -1.644989 | 0.812064  |
| O | -3.315770 | -0.475215 | 2.197486  |
| O | -2.514137 | 0.538082  | 0.086969  |
| H | -4.091895 | -0.812170 | 1.688032  |
| H | -1.516953 | 2.077460  | -0.110389 |
| S | 0.149590  | -3.635491 | -1.389825 |
| O | 1.428420  | -4.058489 | -1.946977 |
| O | -0.672202 | -2.825829 | -2.316452 |
| O | -0.637581 | -4.718994 | -0.790513 |



|         |           |           |           |
|---------|-----------|-----------|-----------|
| O       | 0.583032  | -2.639932 | -0.207802 |
| H       | -2.310694 | -0.202507 | -2.335442 |
| H       | -0.223958 | -2.200462 | 0.176182  |
| S       | -5.922947 | -1.764083 | -0.103338 |
| O       | -5.737077 | -1.150576 | 1.240908  |
| O       | -6.766457 | -2.929516 | -0.122366 |
| O       | -6.629855 | -0.652651 | -1.004969 |
| O       | -4.591918 | -1.992178 | -0.727401 |
| H       | -6.527633 | 0.258982  | -0.623470 |
| H       | -3.500750 | -3.333104 | -0.175770 |
| C       | -1.564570 | 3.821756  | -1.261001 |
| N       | -1.170902 | 3.052680  | -0.045241 |
| C       | -1.683571 | 3.635686  | 1.226180  |
| H       | -1.133268 | 3.322030  | -2.126521 |
| H       | -1.148907 | 4.825298  | -1.178909 |
| H       | -2.650932 | 3.856262  | -1.316332 |
| H       | -0.138973 | 3.020015  | -0.017454 |
| H       | -2.770721 | 3.680166  | 1.181091  |
| H       | -1.257872 | 4.630454  | 1.351383  |
| H       | -1.379833 | 2.982518  | 2.041606  |
| C       | -4.031194 | 0.803600  | -2.913549 |
| N       | -3.277178 | -0.442091 | -2.604980 |
| C       | -3.234639 | -1.415681 | -3.731027 |
| H       | -4.048222 | 1.440933  | -2.033274 |
| H       | -5.050813 | 0.534029  | -3.185146 |
| H       | -3.542974 | 1.315267  | -3.742596 |
| H       | -3.712306 | -0.905464 | -1.782539 |
| H       | -2.630691 | -2.268716 | -3.428658 |
| H       | -2.780295 | -0.934831 | -4.596258 |
| H       | -4.253050 | -1.726010 | -3.960933 |
| C       | -3.217269 | -4.375889 | 1.583986  |
| N       | -3.177752 | -4.278724 | 0.099571  |
| C       | -4.032078 | -5.274304 | -0.602053 |
| H       | -2.593814 | -3.580292 | 1.985293  |
| H       | -2.834715 | -5.350280 | 1.886180  |
| H       | -4.246532 | -4.254369 | 1.920928  |
| H       | -2.186678 | -4.386100 | -0.228111 |
| H       | -5.076815 | -5.075850 | -0.366270 |
| H       | -3.744388 | -6.276853 | -0.287404 |
| H       | -3.872029 | -5.170342 | -1.673803 |
| 8SA8DMA |           |           |           |
| S       | 4.641454  | -3.717344 | 1.756821  |
| O       | 5.592755  | -4.638420 | 1.186484  |
| O       | 3.798524  | -4.234527 | 2.848176  |

|   |           |           |           |
|---|-----------|-----------|-----------|
| O | 5.236056  | -2.405383 | 2.135514  |
| O | 3.521223  | -3.364075 | 0.635826  |
| H | 1.893300  | -1.657083 | 2.979206  |
| H | 3.933542  | -2.829939 | -0.082047 |
| C | 3.214807  | -1.351556 | 4.550650  |
| N | 2.294493  | -2.212354 | 3.762006  |
| C | 1.182413  | -2.797995 | 4.547737  |
| H | 3.993575  | -1.004156 | 3.878009  |
| H | 3.652609  | -1.947431 | 5.351272  |
| H | 2.659744  | -0.509105 | 4.963340  |
| H | 2.864868  | -3.005706 | 3.347761  |
| H | 0.580624  | -3.423580 | 3.890094  |
| H | 0.566924  | -2.001127 | 4.965048  |
| H | 1.593681  | -3.410882 | 5.349355  |
| S | -4.350756 | -2.844777 | -1.469207 |
| O | -3.094029 | -3.514573 | -1.164127 |
| O | -5.514393 | -3.738782 | -1.571941 |
| O | -4.611788 | -1.712057 | -0.546516 |
| O | -4.247737 | -2.212057 | -2.936090 |
| H | -7.381183 | -2.208853 | 0.566266  |
| H | -3.621574 | -1.444507 | -2.918999 |
| C | -8.086673 | -4.159396 | 0.636957  |
| N | -7.660401 | -2.954877 | -0.116075 |
| C | -8.697716 | -2.397484 | -1.022779 |
| H | -7.255516 | -4.494458 | 1.255340  |
| H | -8.357532 | -4.948639 | -0.063935 |
| H | -8.938078 | -3.910198 | 1.270046  |
| H | -6.807251 | -3.202160 | -0.683584 |
| H | -8.297887 | -1.492786 | -1.475679 |
| H | -9.587185 | -2.149943 | -0.443564 |
| H | -8.937903 | -3.132594 | -1.790453 |
| S | 4.150554  | -1.517959 | -2.587702 |
| O | 2.757529  | -1.918529 | -2.775719 |
| O | 4.425709  | -0.161460 | -3.083037 |
| O | 4.709892  | -1.785179 | -1.266413 |
| O | 5.033827  | -2.519234 | -3.529885 |
| H | 6.231957  | -1.628379 | 1.144778  |
| H | 4.663213  | -2.488621 | -4.422516 |
| C | 7.680421  | -0.164049 | 1.446901  |
| N | 6.873642  | -1.028045 | 0.549506  |
| C | 7.676288  | -1.907237 | -0.341193 |
| H | 7.001681  | 0.466449  | 2.015983  |
| H | 8.342104  | 0.465269  | 0.851863  |
| H | 8.263597  | -0.795524 | 2.116612  |

|   |           |           |           |
|---|-----------|-----------|-----------|
| H | 6.232482  | -0.430682 | 0.007654  |
| H | 6.992406  | -2.488728 | -0.952699 |
| H | 8.279231  | -2.573038 | 0.275115  |
| H | 8.318136  | -1.293059 | -0.973378 |
| S | -6.676241 | 0.316059  | 1.148837  |
| O | -7.086980 | -0.986946 | 1.697512  |
| O | -7.633023 | 1.391161  | 1.283259  |
| O | -5.309022 | 0.690579  | 1.609221  |
| O | -6.540725 | 0.102269  | -0.448380 |
| H | -3.882725 | -0.372883 | 1.587249  |
| H | -5.762099 | -0.496292 | -0.616812 |
| C | -2.362889 | 0.194791  | 2.864550  |
| N | -2.895237 | -0.650253 | 1.762080  |
| C | -2.800163 | -2.107912 | 2.034699  |
| H | -2.483530 | 1.240332  | 2.594231  |
| H | -1.302892 | -0.024258 | 2.986976  |
| H | -2.919021 | -0.025367 | 3.775882  |
| H | -2.385654 | -0.437776 | 0.877890  |
| H | -3.107003 | -2.647062 | 1.143245  |
| H | -3.451618 | -2.354410 | 2.873428  |
| H | -1.765480 | -2.344522 | 2.280865  |
| S | -2.265728 | 0.635994  | -1.656121 |
| O | -2.504793 | -0.122124 | -2.882827 |
| O | -1.552407 | -0.184456 | -0.640796 |
| O | -1.188759 | 1.751919  | -2.137298 |
| O | -3.384751 | 1.368899  | -1.096990 |
| H | -1.206374 | 2.554910  | -1.535232 |
| H | -3.932528 | 3.707566  | 0.584211  |
| C | -5.564139 | 4.001354  | 1.815292  |
| N | -4.900819 | 3.339844  | 0.658018  |
| C | -5.609380 | 3.542880  | -0.638347 |
| H | -4.966416 | 3.817959  | 2.706354  |
| H | -6.556688 | 3.571561  | 1.935782  |
| H | -5.615843 | 5.072977  | 1.626929  |
| H | -4.853693 | 2.322479  | 0.856664  |
| H | -5.063213 | 2.998133  | -1.403790 |
| H | -5.629188 | 4.609436  | -0.861343 |
| H | -6.618481 | 3.146529  | -0.543208 |
| S | 1.554434  | 0.313313  | 1.081678  |
| O | 0.838261  | -0.684338 | 1.902089  |
| O | 1.086823  | 1.690177  | 1.343155  |
| O | 3.036397  | 0.244497  | 1.697033  |
| O | 1.642184  | -0.007461 | -0.336680 |
| H | 3.721640  | 0.570732  | 1.052077  |

|   |           |           |           |
|---|-----------|-----------|-----------|
| H | 1.107183  | -1.837119 | -1.668451 |
| S | -1.157515 | 4.227542  | 0.623230  |
| O | -2.503771 | 4.776272  | 0.721206  |
| O | -0.738132 | 3.894356  | -0.755204 |
| O | -0.124630 | 5.010171  | 1.312418  |
| O | -1.287012 | 2.824861  | 1.397892  |
| H | 0.665669  | 1.655988  | -2.274317 |
| H | -0.416381 | 2.338311  | 1.362808  |
| S | 4.967240  | 2.339629  | -0.639639 |
| O | 5.063740  | 1.136078  | 0.224679  |
| O | 5.691711  | 3.487450  | -0.145623 |
| O | 5.662938  | 1.939477  | -2.015118 |
| O | 3.542840  | 2.636679  | -0.950103 |
| H | 5.232572  | 1.119408  | -2.381812 |
| H | 2.725749  | 3.703254  | 0.291191  |
| C | -0.320842 | -2.788057 | -2.834740 |
| N | 0.175539  | -2.253911 | -1.533979 |
| C | 0.271384  | -3.287506 | -0.463257 |
| H | -0.462274 | -1.954717 | -3.519998 |
| H | -1.274194 | -3.282346 | -2.659520 |
| H | 0.420410  | -3.480854 | -3.228854 |
| H | -0.449401 | -1.488534 | -1.209654 |
| H | 1.007570  | -4.033888 | -0.756275 |
| H | -0.712984 | -3.735600 | -0.339669 |
| H | 0.601725  | -2.793207 | 0.447211  |
| C | 1.690118  | 1.050376  | -3.951724 |
| N | 1.527910  | 1.938434  | -2.767136 |
| C | 1.411522  | 3.380584  | -3.126072 |
| H | 1.813114  | 0.026162  | -3.611521 |
| H | 2.581854  | 1.347895  | -4.499375 |
| H | 0.801105  | 1.150835  | -4.573644 |
| H | 2.311713  | 1.831509  | -2.097940 |
| H | 1.122995  | 3.938245  | -2.238740 |
| H | 0.635391  | 3.488999  | -3.882270 |
| H | 2.371465  | 3.722692  | -3.508392 |
| C | 3.117038  | 4.049051  | 2.287148  |
| N | 2.548796  | 4.464023  | 0.974249  |
| C | 3.138150  | 5.718008  | 0.432099  |
| H | 2.652379  | 3.105604  | 2.563662  |
| H | 2.891989  | 4.817140  | 3.026634  |
| H | 4.193751  | 3.926869  | 2.177201  |
| H | 1.513198  | 4.585621  | 1.071824  |
| H | 4.197624  | 5.552158  | 0.243446  |
| H | 2.989094  | 6.521414  | 1.152659  |

H 2.627698 5.967170 -0.496798

Coordinate information for SA-MA-DMA system

1MA

O 0.386462 1.694575 0.131780  
O 2.089383 -1.469706 0.246714  
O -2.877627 -0.185634 -0.934861  
O 2.748188 0.572579 -0.429131  
O -2.235582 -0.071073 1.215237  
C 0.488070 0.305920 0.342879  
C -0.561788 -0.443623 -0.488850  
C 1.895271 -0.161902 0.005982  
C -1.955366 -0.199949 0.052330  
H 0.304558 0.080144 1.400476  
H -0.383185 -1.522532 -0.441867  
H -0.507090 -0.132471 -1.533011  
H 1.233373 1.978699 -0.241265  
H 3.007256 -1.674248 0.011709  
H -3.738635 -0.058187 -0.507998

1MA1DMA

O -1.445704 1.770137 -0.617302  
O 0.917955 -0.567141 0.728657  
O -4.127788 -1.048288 -0.704284  
O 1.122038 1.151838 -0.711327  
O -3.690325 0.045397 1.207394  
C -1.050082 0.666677 0.165997  
C -1.847883 -0.582182 -0.228712  
C 0.451664 0.436226 0.014460  
C -3.296909 -0.464643 0.190542  
H -1.247977 0.872314 1.225563  
H -1.435412 -1.460448 0.277534  
H -1.784130 -0.743437 -1.305792  
H -0.637882 2.074786 -1.058492  
H 1.937532 -0.658686 0.596686  
H -5.023866 -0.954061 -0.346970  
C 3.774494 -0.992150 -1.070125  
N 3.547929 -0.754672 0.364332  
C 4.129182 0.515076 0.828863  
H 3.232690 -0.232182 -1.635591  
H 3.379753 -1.972851 -1.342596  
H 4.837356 -0.948862 -1.342234  
H 3.944926 -1.521660 0.899319  
H 3.605432 1.335814 0.335976

H 5.201881 0.593599 0.608518  
H 3.981994 0.608800 1.906491

1MA2DMA

O 0.268335 -2.872692 -1.073269  
O 2.224883 -0.635329 0.932036  
O -2.482151 -1.012916 0.955473  
O 2.042580 -0.927259 -1.295613  
O -0.784579 0.057137 -0.055434  
C 0.794134 -2.379192 0.138541  
C -0.338115 -2.011965 1.102427  
C 1.745494 -1.218803 -0.149852  
C -1.212537 -0.883021 0.591686  
H 1.402072 -3.156326 0.625780  
H 0.086493 -1.694544 2.059998  
H -0.957540 -2.890582 1.285164  
H 0.700476 -2.349045 -1.766233  
H 2.759672 0.187497 0.641684  
H -3.005693 -0.222736 0.592858  
C -4.504368 0.847523 -1.325279  
N -3.627932 1.155224 -0.192133  
C -4.134293 2.230335 0.663404  
H -5.456635 0.459549 -0.954361  
H -4.040689 0.076078 -1.942603  
H -4.714374 1.723634 -1.955936  
H -2.697302 1.390457 -0.531349  
H -5.068737 1.912728 1.133362  
H -4.329136 3.162280 0.112751  
H -3.410203 2.437202 1.453759  
C 2.303539 2.576143 -0.042801  
N 3.336550 1.537218 -0.136706  
C 4.695109 2.033631 0.091121  
H 2.285435 2.975737 0.974605  
H 1.329788 2.130699 -0.253134  
H 2.475410 3.411056 -0.736741  
H 3.272870 1.088365 -1.048306  
H 4.781586 2.400859 1.116982  
H 4.971195 2.852835 -0.588461  
H 5.408652 1.217719 -0.038974

1MA3DMA

O -0.934339 -2.854271 1.249694  
O -3.125051 -0.831857 -0.669602  
O 0.906724 -0.696381 -1.832369  
O -1.646777 -0.147494 0.885607  
O 1.356140 -1.695771 0.129519

|         |           |           |           |
|---------|-----------|-----------|-----------|
| C       | -1.514340 | -2.423870 | 0.046748  |
| C       | -0.519893 | -2.474872 | -1.142391 |
| C       | -2.098453 | -1.006813 | 0.155389  |
| C       | 0.681871  | -1.579976 | -0.891851 |
| H       | -2.343218 | -3.099443 | -0.175153 |
| H       | -1.015341 | -2.192110 | -2.070899 |
| H       | -0.162245 | -3.504836 | -1.225221 |
| H       | -0.058841 | -2.440025 | 1.300972  |
| H       | -3.467187 | 0.125363  | -0.605589 |
| H       | 1.707673  | -0.055303 | -1.580915 |
| C       | 4.142685  | 0.309915  | -1.622266 |
| N       | 2.868288  | 0.934238  | -1.252584 |
| C       | 2.681070  | 2.258821  | -1.850503 |
| H       | 4.167748  | 0.127691  | -2.700456 |
| H       | 4.230946  | -0.651119 | -1.112230 |
| H       | 5.010633  | 0.930260  | -1.358995 |
| H       | 2.814765  | 1.003616  | -0.224215 |
| H       | 2.626337  | 2.171367  | -2.939347 |
| H       | 3.496384  | 2.953270  | -1.603643 |
| H       | 1.741557  | 2.686822  | -1.495687 |
| C       | -4.424157 | 1.853800  | 0.971559  |
| N       | -4.017615 | 1.709888  | -0.433815 |
| C       | -2.903287 | 2.595729  | -0.797350 |
| H       | -3.603220 | 1.512315  | 1.604400  |
| H       | -5.292723 | 1.221073  | 1.164641  |
| H       | -4.673845 | 2.890268  | 1.237902  |
| H       | -4.811886 | 1.900093  | -1.037386 |
| H       | -2.020987 | 2.288687  | -0.233072 |
| H       | -3.112655 | 3.653166  | -0.583225 |
| H       | -2.685170 | 2.487623  | -1.861762 |
| C       | 3.756607  | 0.571813  | 2.591918  |
| N       | 2.566197  | 0.601004  | 1.747141  |
| C       | 1.402174  | 1.178035  | 2.422535  |
| H       | 4.081478  | 1.594059  | 2.810968  |
| H       | 4.572220  | 0.066218  | 2.068934  |
| H       | 3.596757  | 0.060604  | 3.555636  |
| H       | 2.327693  | -0.339622 | 1.440014  |
| H       | 1.543067  | 2.256116  | 2.553957  |
| H       | 1.224740  | 0.740237  | 3.418495  |
| H       | 0.507977  | 1.008389  | 1.821165  |
| 1MA4DMA |           |           |           |
| O       | 0.354717  | 0.490226  | 0.968953  |
| O       | 2.849413  | -1.838173 | -0.090255 |
| O       | -1.875897 | 0.197164  | -1.702053 |

|   |           |           |           |
|---|-----------|-----------|-----------|
| O | 3.085098  | 0.366002  | 0.265101  |
| O | -1.807344 | -1.700592 | -0.494700 |
| C | 0.851019  | -0.605473 | 0.249528  |
| C | 0.261160  | -0.698398 | -1.176937 |
| C | 2.379969  | -0.623249 | 0.156019  |
| C | -1.252328 | -0.791385 | -1.091060 |
| H | 0.546292  | -1.506258 | 0.787005  |
| H | 0.636822  | -1.602027 | -1.664096 |
| H | 0.548715  | 0.173449  | -1.767827 |
| H | 0.664468  | 1.340232  | 0.570728  |
| H | 3.864827  | -1.814499 | -0.177546 |
| H | -2.896810 | 0.146746  | -1.521973 |
| C | -5.208569 | 1.339099  | -1.342192 |
| N | -4.467840 | 0.092272  | -1.146261 |
| C | -5.069683 | -1.054991 | -1.830268 |
| H | -5.189153 | 1.622252  | -2.398763 |
| H | -4.733989 | 2.137900  | -0.768598 |
| H | -6.260830 | 1.264143  | -1.030093 |
| H | -4.395377 | -0.119059 | -0.140505 |
| H | -5.059065 | -0.888560 | -2.911677 |
| H | -6.110075 | -1.237382 | -1.523916 |
| H | -4.474492 | -1.943987 | -1.614878 |
| C | 5.871326  | -0.835855 | -1.391059 |
| N | 5.541585  | -1.744332 | -0.284377 |
| C | 6.019944  | -1.254611 | 1.016513  |
| H | 5.323398  | 0.097039  | -1.246865 |
| H | 5.550512  | -1.281160 | -2.334977 |
| H | 6.945209  | -0.611267 | -1.452108 |
| H | 5.940449  | -2.660018 | -0.468316 |
| H | 5.476184  | -0.340880 | 1.262672  |
| H | 7.097697  | -1.040739 | 1.020048  |
| H | 5.805551  | -1.999224 | 1.785609  |
| C | 1.245395  | 3.834173  | -0.882761 |
| N | 1.517761  | 2.940679  | 0.238303  |
| C | 1.593392  | 3.624593  | 1.527411  |
| H | 0.248031  | 4.269405  | -0.771962 |
| H | 1.258911  | 3.267982  | -1.816620 |
| H | 1.967332  | 4.663023  | -0.968036 |
| H | 2.373936  | 2.414313  | 0.084943  |
| H | 0.619543  | 4.059961  | 1.770183  |
| H | 2.341455  | 4.433466  | 1.550492  |
| H | 1.839453  | 2.896169  | 2.301973  |
| C | -2.996966 | 0.030512  | 2.531666  |
| N | -3.778860 | -0.864351 | 1.677517  |



|   |           |           |          |
|---|-----------|-----------|----------|
| C | -4.704864 | -1.703820 | 2.430098 |
| H | -3.642646 | 0.814412  | 2.941883 |
| H | -2.203443 | 0.497633  | 1.946352 |
| H | -2.523846 | -0.490736 | 3.380465 |
| H | -3.137230 | -1.441851 | 1.137881 |
| H | -5.475765 | -1.081565 | 2.896403 |
| H | -4.218050 | -2.284551 | 3.231842 |
| H | -5.203188 | -2.404827 | 1.755888 |

#### 1SA1MA

|   |           |           |           |
|---|-----------|-----------|-----------|
| S | 2.591090  | 0.212789  | 0.030249  |
| O | 3.962168  | 0.569110  | -0.012838 |
| O | 1.988123  | -0.274142 | 1.259960  |
| O | 1.772273  | 1.484086  | -0.456003 |
| O | 2.331185  | -0.860138 | -1.098302 |
| H | 0.807429  | 1.377659  | -0.315995 |
| H | 1.437168  | -1.269693 | -0.964159 |
| O | -2.772109 | -1.314532 | -1.244046 |
| O | -0.503267 | -1.175135 | 1.520795  |
| O | -2.984420 | 2.385918  | -0.101541 |
| O | -0.206625 | -1.632170 | -0.669854 |
| O | -1.013776 | 1.338409  | -0.225452 |
| C | -2.422100 | -1.203122 | 0.112667  |
| C | -2.919552 | 0.141534  | 0.663508  |
| C | -0.915979 | -1.358106 | 0.287513  |
| C | -2.194110 | 1.321818  | 0.058990  |
| H | -2.898212 | -2.000730 | 0.700388  |
| H | -2.759821 | 0.184011  | 1.745378  |
| H | -3.988580 | 0.233976  | 0.474130  |
| H | -1.970175 | -1.580329 | -1.717346 |
| H | 0.478855  | -1.041856 | 1.531876  |
| H | -2.442075 | 3.108354  | -0.456067 |

#### 1SA1MA1DMA

|   |           |           |           |
|---|-----------|-----------|-----------|
| S | 2.800590  | -0.353407 | -0.281187 |
| O | 2.377757  | -0.403427 | 1.237335  |
| O | 4.211114  | -0.178752 | -0.353430 |
| O | 2.422607  | -1.756576 | -0.831512 |
| O | 1.947487  | 0.646729  | -0.933227 |
| H | 1.412059  | -1.962985 | -0.695244 |
| H | 0.718522  | 1.507184  | -0.246451 |
| O | -2.518250 | 0.306291  | 1.596209  |
| O | -3.775518 | -0.606104 | -1.609742 |
| O | -0.147934 | -0.826957 | 1.274577  |
| O | -2.275221 | 0.969601  | -1.090526 |
| O | -0.036239 | -2.264237 | -0.451759 |

|            |           |           |           |
|------------|-----------|-----------|-----------|
| C          | -2.975210 | -0.610640 | 0.633322  |
| C          | -2.152809 | -1.924799 | 0.611955  |
| C          | -2.955867 | 0.021914  | -0.758361 |
| C          | -0.652518 | -1.668302 | 0.449433  |
| H          | -4.019137 | -0.859950 | 0.847562  |
| H          | -2.500690 | -2.581980 | -0.183712 |
| H          | -2.309304 | -2.423904 | 1.572457  |
| H          | -1.595801 | 0.040446  | 1.791604  |
| H          | -3.670908 | -0.194944 | -2.481754 |
| H          | 1.376624  | -0.618686 | 1.297600  |
| C          | 0.229134  | 2.556651  | 1.486234  |
| N          | -0.030004 | 2.172090  | 0.073812  |
| C          | -0.061175 | 3.312464  | -0.880126 |
| H          | 1.173233  | 3.097619  | 1.537650  |
| H          | 0.298438  | 1.650743  | 2.082800  |
| H          | -0.586647 | 3.181852  | 1.847120  |
| H          | -0.926010 | 1.661106  | -0.011476 |
| H          | 0.916543  | 3.791925  | -0.892771 |
| H          | -0.828100 | 4.022753  | -0.572623 |
| H          | -0.293980 | 2.922451  | -1.868604 |
| 1SA1MA2DMA |           |           |           |
| S          | 2.426885  | -0.399622 | -0.638501 |
| O          | 1.808389  | -1.752386 | -1.287171 |
| O          | 3.815189  | -0.673503 | -0.419740 |
| O          | 2.112250  | 0.680672  | -1.595823 |
| O          | 1.629765  | -0.207715 | 0.617966  |
| H          | 0.626378  | 0.922603  | -2.188041 |
| H          | 0.594627  | -1.555784 | 1.086380  |
| O          | -3.103238 | -1.310977 | -0.360756 |
| O          | -2.035222 | 2.031473  | 0.470255  |
| O          | -0.756010 | -0.974460 | -1.895036 |
| O          | -1.646888 | 0.094457  | 1.509382  |
| O          | -0.337807 | 1.188828  | -2.316019 |
| C          | -3.066808 | 0.102291  | -0.467636 |
| C          | -2.595697 | 0.558354  | -1.875135 |
| C          | -2.187742 | 0.789692  | 0.611862  |
| C          | -1.142722 | 0.188754  | -2.054527 |
| H          | -4.089634 | 0.460657  | -0.323623 |
| H          | -2.718223 | 1.632920  | -1.978613 |
| H          | -3.192493 | 0.037254  | -2.628477 |
| H          | -2.346275 | -1.635954 | -0.867847 |
| H          | -0.545595 | 2.277220  | 0.922915  |
| H          | 0.929230  | -1.518263 | -1.665957 |
| C          | -0.489497 | -3.313007 | 0.713506  |

|   |           |           |           |
|---|-----------|-----------|-----------|
| N | -0.218868 | -2.074617 | 1.482210  |
| C | 0.020919  | -2.298637 | 2.928093  |
| H | 0.333710  | -4.014598 | 0.848187  |
| H | -0.571463 | -3.059900 | -0.340058 |
| H | -1.423150 | -3.753031 | 1.062778  |
| H | -1.007458 | -1.360027 | 1.388315  |
| H | 0.894504  | -2.936760 | 3.062719  |
| H | -0.856896 | -2.768902 | 3.370894  |
| H | 0.192220  | -1.334209 | 3.401486  |
| C | 1.198687  | 3.367882  | 0.434612  |
| N | 0.494819  | 2.308120  | 1.198005  |
| C | 0.565551  | 2.449811  | 2.671686  |
| H | 0.745702  | 4.333663  | 0.659262  |
| H | 1.102449  | 3.148201  | -0.626227 |
| H | 2.254772  | 3.377482  | 0.704795  |
| H | 0.892380  | 1.381374  | 0.937515  |
| H | 0.177790  | 3.427559  | 2.958505  |
| H | 1.597856  | 2.345327  | 3.006433  |
| H | -0.059812 | 1.670633  | 3.103946  |

#### 1SA1MA3DMA

|   |           |           |           |
|---|-----------|-----------|-----------|
| S | -1.080956 | 2.026854  | -0.392773 |
| O | -1.010133 | 1.121510  | -1.715858 |
| O | -1.951555 | 3.121668  | -0.728001 |
| O | -1.640563 | 1.109238  | 0.660023  |
| O | 0.304531  | 2.387211  | -0.039282 |
| H | -2.566777 | -1.437920 | -0.803347 |
| H | 1.695596  | 1.773773  | -0.826303 |
| O | 2.753243  | -2.021803 | -1.271290 |
| O | 1.201422  | -1.797074 | 1.971278  |
| O | 0.176006  | -1.123243 | -1.420668 |
| O | 2.495817  | -0.344804 | 0.879688  |
| O | -1.467109 | -2.521018 | -0.795914 |
| C | 2.136266  | -2.538975 | -0.098686 |
| C | 0.793101  | -3.211741 | -0.429575 |
| C | 1.941529  | -1.466557 | 1.001200  |
| C | -0.258759 | -2.212898 | -0.918942 |
| H | 2.820427  | -3.288955 | 0.310355  |
| H | 0.391451  | -3.722117 | 0.444075  |
| H | 0.950648  | -3.958282 | -1.215620 |
| H | 2.023225  | -1.559473 | -1.713345 |
| H | 0.582452  | -0.521548 | 2.513976  |
| H | -0.569922 | 0.212709  | -1.548202 |
| C | 2.577392  | 0.993568  | -2.550912 |
| N | 2.594437  | 1.321244  | -1.105877 |

|            |           |           |           |
|------------|-----------|-----------|-----------|
| C          | 3.721699  | 2.189807  | -0.695533 |
| H          | 2.595236  | 1.915252  | -3.134061 |
| H          | 1.664771  | 0.444399  | -2.770933 |
| H          | 3.445287  | 0.379525  | -2.789372 |
| H          | 2.624986  | 0.446618  | -0.486655 |
| H          | 3.664161  | 3.145198  | -1.218016 |
| H          | 4.662934  | 1.692246  | -0.929554 |
| H          | 3.658888  | 2.352835  | 0.378581  |
| C          | -0.957343 | 0.088054  | 3.829180  |
| N          | 0.053093  | 0.395388  | 2.793874  |
| C          | 1.044675  | 1.422105  | 3.194775  |
| H          | -0.457593 | -0.281174 | 4.725154  |
| H          | -1.624296 | -0.684408 | 3.448153  |
| H          | -1.533904 | 0.982673  | 4.067904  |
| H          | -0.449076 | 0.710669  | 1.938967  |
| H          | 1.497141  | 1.126967  | 4.142611  |
| H          | 0.557908  | 2.392319  | 3.295601  |
| H          | 1.807567  | 1.451441  | 2.421590  |
| C          | -3.996822 | -0.176678 | -1.755584 |
| N          | -3.336624 | -0.721579 | -0.543922 |
| C          | -4.256551 | -1.372681 | 0.415850  |
| H          | -4.467829 | -0.992257 | -2.305303 |
| H          | -3.237419 | 0.305794  | -2.367050 |
| H          | -4.747763 | 0.559366  | -1.465938 |
| H          | -2.806983 | 0.037831  | -0.058865 |
| H          | -4.787260 | -2.183277 | -0.083884 |
| H          | -4.972081 | -0.645679 | 0.802364  |
| H          | -3.667228 | -1.787047 | 1.232505  |
| 1SA1MA4DMA |           |           |           |
| S          | 1.950439  | -1.813257 | -0.772406 |
| O          | 1.591481  | -0.731082 | -1.902768 |
| O          | 2.867903  | -2.724860 | -1.401777 |
| O          | 2.559941  | -1.009931 | 0.343083  |
| O          | 0.676646  | -2.392800 | -0.306067 |
| H          | 3.023582  | 1.797601  | -0.783523 |
| H          | -0.858039 | -1.865884 | -0.870906 |
| O          | -2.377528 | 1.986012  | -0.534710 |
| O          | -0.418533 | 1.255629  | 2.395262  |
| O          | 0.223020  | 1.281144  | -1.091470 |
| O          | -1.785009 | -0.053598 | 1.204844  |
| O          | 1.830439  | 2.726791  | -0.476770 |
| C          | -1.643560 | 2.307741  | 0.644587  |
| C          | -0.392182 | 3.128678  | 0.298918  |
| C          | -1.263641 | 1.057074  | 1.476385  |

|   |           |           |           |
|---|-----------|-----------|-----------|
| C | 0.645293  | 2.320460  | -0.484462 |
| H | -2.308510 | 2.914419  | 1.266721  |
| H | 0.085516  | 3.499413  | 1.204364  |
| H | -0.685246 | 3.993217  | -0.306169 |
| H | -1.700490 | 1.608000  | -1.119916 |
| H | 0.360449  | -0.021043 | 2.638018  |
| H | 1.082692  | 0.076564  | -1.534743 |
| C | -1.986559 | -0.969583 | -2.382615 |
| N | -1.830790 | -1.517436 | -1.012496 |
| C | -2.795360 | -2.601614 | -0.697943 |
| H | -1.843074 | -1.771124 | -3.107981 |
| H | -1.232062 | -0.202098 | -2.539631 |
| H | -2.987873 | -0.551907 | -2.472968 |
| H | -1.935279 | -0.762595 | -0.278655 |
| H | -2.655716 | -3.425467 | -1.398577 |
| H | -3.800092 | -2.185984 | -0.770732 |
| H | -2.606581 | -2.948787 | 0.316504  |
| C | 2.065882  | -0.715431 | 3.682361  |
| N | 0.982822  | -0.919014 | 2.695710  |
| C | 0.109680  | -2.084422 | 2.976459  |
| H | 1.631377  | -0.547848 | 4.668148  |
| H | 2.643113  | 0.161100  | 3.390922  |
| H | 2.718625  | -1.588841 | 3.707489  |
| H | 1.421304  | -1.022704 | 1.759679  |
| H | -0.248397 | -2.018001 | 4.004878  |
| H | 0.663316  | -3.011229 | 2.827830  |
| H | -0.734890 | -2.025973 | 2.295017  |
| C | 4.423974  | 0.890098  | -2.103461 |
| N | 3.891344  | 1.152649  | -0.744188 |
| C | 4.866707  | 1.754321  | 0.192732  |
| H | 4.732630  | 1.832968  | -2.556303 |
| H | 3.635445  | 0.426371  | -2.692180 |
| H | 5.275119  | 0.211082  | -2.041047 |
| H | 3.514297  | 0.268387  | -0.333002 |
| H | 5.229272  | 2.697379  | -0.216797 |
| H | 5.704172  | 1.073340  | 0.349851  |
| H | 4.362833  | 1.949660  | 1.138211  |
| C | -5.951537 | 0.627654  | -1.352524 |
| N | -4.863196 | 0.132903  | -0.516867 |
| C | -5.288202 | -0.145062 | 0.852893  |
| H | -6.700304 | -0.158589 | -1.498304 |
| H | -5.567299 | 0.907098  | -2.336978 |
| H | -6.471401 | 1.504514  | -0.928716 |
| H | -4.112482 | 0.821978  | -0.488487 |

H -5.960942 -1.010222 0.871957  
H -5.823994 0.697608 1.323960  
H -4.409180 -0.371938 1.458441

1SA2MA

S 0.177907 3.117535 0.043790  
O 1.588506 3.297703 0.297674  
O -0.655919 4.217036 -0.299818  
O 0.020941 2.040858 -1.134634  
O -0.366691 2.332001 1.291417  
H 0.777771 1.370580 -1.083372  
H -1.282233 1.973106 1.107438  
O 3.887146 -1.638513 -1.362666  
O 3.302563 1.209892 0.591255  
O 1.547428 -2.960759 -0.382431  
O 1.910151 0.269888 -0.914119  
O 0.879398 -2.053861 1.563689  
C 3.769147 -1.020846 -0.111227  
C 3.210819 -1.967654 0.989798  
C 2.900735 0.236702 -0.192780  
C 1.761855 -2.335445 0.767605  
H 4.772626 -0.717445 0.189235  
H 3.293214 -1.504303 1.972673  
H 3.821198 -2.873526 0.961986  
H 3.018546 -1.983364 -1.609099  
H 2.694534 1.991758 0.534554  
H 0.566963 -3.074539 -0.537516  
O -4.435565 -0.886336 1.046442  
O -2.355092 0.583886 -1.481754  
O -1.709219 -1.922642 0.991370  
O -2.620231 1.094632 0.699250  
O -1.072208 -2.998976 -0.875879  
C -3.895089 -0.729650 -0.234799  
C -3.267135 -2.027994 -0.801462  
C -2.895592 0.427863 -0.280103  
C -1.906594 -2.375626 -0.239806  
H -4.726300 -0.459672 -0.893477  
H -3.162054 -1.978643 -1.884927  
H -3.954702 -2.845849 -0.566771  
H -3.701321 -0.891988 1.673232  
H -1.642699 1.259398 -1.456416  
H -0.760584 -2.068648 1.270110

1SA2MA1DMA

S 1.370363 -2.371996 0.214638  
O 0.521402 -2.321260 1.409968

|   |           |           |           |
|---|-----------|-----------|-----------|
| O | 2.721735  | -2.876003 | 0.453548  |
| O | 0.717566  | -3.417146 | -0.790369 |
| O | 1.408081  | -1.072146 | -0.500595 |
| H | -0.239776 | -3.180617 | -0.889613 |
| H | 1.023868  | 0.324196  | 0.101843  |
| O | -4.427806 | -1.942744 | -1.373898 |
| O | -2.056821 | -1.905977 | 1.300072  |
| O | -2.920792 | 0.585483  | -0.876246 |
| O | -1.908069 | -2.635748 | -0.831275 |
| O | -3.530983 | 1.655740  | 1.002123  |
| C | -4.026529 | -1.864424 | -0.029750 |
| C | -4.431673 | -0.521890 | 0.603402  |
| C | -2.536896 | -2.169139 | 0.109044  |
| C | -3.581666 | 0.681248  | 0.262851  |
| H | -4.537901 | -2.648445 | 0.550287  |
| H | -4.444815 | -0.596294 | 1.690727  |
| H | -5.453793 | -0.305342 | 0.277538  |
| H | -3.644500 | -2.199193 | -1.880554 |
| H | -1.069181 | -2.090416 | 1.350906  |
| H | -2.389604 | 1.409706  | -1.034216 |
| O | 0.973978  | 3.943136  | -1.501817 |
| O | -1.502569 | 3.342896  | 1.013928  |
| O | 2.986306  | 1.660423  | 0.520143  |
| O | -1.371574 | 2.785165  | -1.163932 |
| O | 0.776586  | 1.264487  | 0.369694  |
| C | 0.429838  | 4.030922  | -0.205516 |
| C | 1.435859  | 3.479394  | 0.822986  |
| C | -0.915906 | 3.311593  | -0.155551 |
| C | 1.822034  | 2.040057  | 0.549308  |
| H | 0.233531  | 5.080908  | 0.052085  |
| H | 1.002050  | 3.537288  | 1.825513  |
| H | 2.342080  | 4.082959  | 0.796595  |
| H | 0.317296  | 3.470261  | -2.035324 |
| H | -2.331812 | 2.777017  | 1.000716  |
| H | 3.702186  | 0.110963  | 0.159819  |
| C | 4.475163  | -0.671597 | -1.586916 |
| N | 4.304182  | -0.699231 | -0.109544 |
| C | 5.568909  | -0.647417 | 0.665183  |
| H | 4.972705  | 0.253990  | -1.875355 |
| H | 3.484086  | -0.723120 | -2.032577 |
| H | 5.068194  | -1.531527 | -1.896818 |
| H | 3.764654  | -1.563242 | 0.140846  |
| H | 6.090889  | 0.283380  | 0.445102  |
| H | 6.193951  | -1.498934 | 0.397317  |

|            |           |           |           |
|------------|-----------|-----------|-----------|
| H          | 5.329721  | -0.689924 | 1.726763  |
| 1SA2MA2DMA |           |           |           |
| S          | -1.997576 | 1.136600  | 1.376322  |
| O          | -1.103395 | 2.008604  | 2.140046  |
| O          | -3.386955 | 1.131030  | 1.773954  |
| O          | -2.015388 | 1.710972  | -0.139367 |
| O          | -1.442838 | -0.241278 | 1.235731  |
| H          | -1.192091 | 2.238135  | -0.312802 |
| H          | -3.606823 | -0.900869 | -0.870378 |
| O          | 2.476153  | 3.896109  | -1.849514 |
| O          | 1.221829  | 2.940522  | 1.365760  |
| O          | 2.565640  | 1.035566  | -0.981704 |
| O          | 0.244119  | 3.066668  | -0.662924 |
| O          | 4.616589  | 0.669544  | -0.145457 |
| C          | 2.529605  | 3.742773  | -0.452520 |
| C          | 3.734391  | 2.888580  | -0.035184 |
| C          | 1.206331  | 3.201600  | 0.082361  |
| C          | 3.687139  | 1.421863  | -0.404286 |
| H          | 2.658440  | 4.728720  | 0.017980  |
| H          | 3.872552  | 2.931711  | 1.048210  |
| H          | 4.635493  | 3.310601  | -0.486191 |
| H          | 1.603829  | 3.579318  | -2.123424 |
| H          | 0.334877  | 2.587226  | 1.677952  |
| H          | 2.571577  | 0.048821  | -1.136328 |
| O          | 1.939702  | -4.345672 | -1.021017 |
| O          | 4.285632  | -1.955281 | 0.127749  |
| O          | 0.657759  | -1.688310 | 1.947689  |
| O          | 2.470337  | -1.606444 | -1.159468 |
| O          | -0.166272 | -2.990283 | 0.310328  |
| C          | 2.699248  | -3.720500 | -0.023111 |
| C          | 1.927677  | -3.594974 | 1.320415  |
| C          | 3.152809  | -2.318353 | -0.434980 |
| C          | 0.690513  | -2.733565 | 1.147541  |
| H          | 3.589562  | -4.328501 | 0.145551  |
| H          | 2.569961  | -3.184110 | 2.098731  |
| H          | 1.610708  | -4.600609 | 1.606856  |
| H          | 1.058872  | -3.943077 | -0.995710 |
| H          | 4.475005  | -0.988122 | -0.049499 |
| H          | -0.134690 | -1.114711 | 1.749560  |
| C          | -3.146343 | -2.948489 | -0.747677 |
| N          | -2.736787 | -1.525846 | -0.851841 |
| C          | -1.859080 | -1.223142 | -2.013148 |
| H          | -3.699047 | -3.231338 | -1.644277 |
| H          | -3.786565 | -3.063701 | 0.126520  |



|   |           |           |           |
|---|-----------|-----------|-----------|
| H | -2.259030 | -3.565798 | -0.631468 |
| H | -2.221928 | -1.234768 | 0.006290  |
| H | -2.375247 | -1.482919 | -2.937807 |
| H | -0.937083 | -1.794013 | -1.917429 |
| H | -1.633341 | -0.158710 | -1.993136 |
| C | -5.085359 | 1.210222  | -1.719825 |
| N | -4.975692 | 0.201201  | -0.657815 |
| C | -6.261709 | -0.432953 | -0.345905 |
| H | -5.333969 | 0.726773  | -2.669526 |
| H | -4.129363 | 1.724298  | -1.821673 |
| H | -5.861561 | 1.959011  | -1.508214 |
| H | -4.621032 | 0.656735  | 0.185346  |
| H | -6.605586 | -1.021748 | -1.201540 |
| H | -7.045468 | 0.298204  | -0.102795 |
| H | -6.144115 | -1.101992 | 0.509128  |

#### 1SA2MA3DMA

|   |           |           |           |
|---|-----------|-----------|-----------|
| S | -1.531181 | -0.688782 | -1.666215 |
| O | -0.430928 | -1.397403 | -2.324427 |
| O | -2.806427 | -0.725057 | -2.338976 |
| O | -1.777370 | -1.437063 | -0.251739 |
| O | -1.123151 | 0.694517  | -1.268515 |
| H | -0.940793 | -1.890674 | 0.035717  |
| H | -2.732119 | 0.891187  | 1.567448  |
| O | 2.404972  | -3.977253 | 1.916246  |
| O | 1.457222  | -2.964470 | -1.393466 |
| O | 3.332031  | -1.338256 | 1.213399  |
| O | 0.454689  | -2.634935 | 0.596787  |
| O | 4.947798  | -1.231557 | -0.343775 |
| C | 2.517713  | -3.884024 | 0.520909  |
| C | 3.887478  | -3.344816 | 0.055194  |
| C | 1.357155  | -3.091206 | -0.088941 |
| C | 4.116037  | -1.867660 | 0.283453  |
| H | 2.427423  | -4.904480 | 0.134802  |
| H | 4.042920  | -3.529250 | -1.008013 |
| H | 4.662114  | -3.890478 | 0.602388  |
| H | 2.239721  | -3.085627 | 2.245967  |
| H | 0.716408  | -2.396218 | -1.760341 |
| H | 3.454711  | -0.344442 | 1.250618  |
| O | 3.188873  | 4.057130  | 1.059858  |
| O | 4.951562  | 1.428535  | -0.567647 |
| O | 1.088904  | 1.966061  | -1.992015 |
| O | 3.464327  | 1.295015  | 1.118637  |
| O | 0.833250  | 2.966209  | 0.004051  |
| C | 3.726230  | 3.395579  | -0.050462 |

|            |           |           |           |
|------------|-----------|-----------|-----------|
| C          | 2.797992  | 3.455296  | -1.292967 |
| C          | 4.044780  | 1.928308  | 0.247402  |
| C          | 1.467355  | 2.774178  | -1.027129 |
| H          | 4.667004  | 3.888056  | -0.305194 |
| H          | 3.278947  | 3.009617  | -2.162952 |
| H          | 2.601679  | 4.510819  | -1.501045 |
| H          | 2.275941  | 3.743062  | 1.149495  |
| H          | 5.034858  | 0.442226  | -0.438768 |
| H          | 0.235566  | 1.497392  | -1.759016 |
| C          | -2.069801 | 2.874824  | 1.404168  |
| N          | -1.822484 | 1.412351  | 1.322305  |
| C          | -0.709985 | 0.939841  | 2.187922  |
| H          | -2.317657 | 3.142041  | 2.432112  |
| H          | -2.907632 | 3.121474  | 0.752276  |
| H          | -1.178583 | 3.403908  | 1.074559  |
| H          | -1.590875 | 1.164358  | 0.336155  |
| H          | -0.949686 | 1.148302  | 3.231249  |
| H          | 0.207215  | 1.451123  | 1.900593  |
| H          | -0.591989 | -0.132599 | 2.042546  |
| C          | -4.033753 | -1.257798 | 2.370210  |
| N          | -4.253259 | 0.119797  | 1.908151  |
| C          | -5.151276 | 0.866407  | 2.795045  |
| H          | -3.498445 | -1.252931 | 3.325104  |
| H          | -3.429451 | -1.788592 | 1.634296  |
| H          | -4.975801 | -1.805426 | 2.517868  |
| H          | -4.678460 | 0.078092  | 0.966760  |
| H          | -4.688347 | 0.997915  | 3.778238  |
| H          | -6.115572 | 0.359741  | 2.946632  |
| H          | -5.349614 | 1.855738  | 2.376021  |
| C          | -6.484552 | -1.082870 | -1.002031 |
| N          | -5.429055 | -0.073747 | -0.915892 |
| C          | -5.815972 | 1.192036  | -1.538447 |
| H          | -7.347825 | -0.772817 | -0.404096 |
| H          | -6.119344 | -2.031600 | -0.602849 |
| H          | -6.835826 | -1.256574 | -2.031671 |
| H          | -4.597806 | -0.420515 | -1.393446 |
| H          | -6.624340 | 1.660128  | -0.966860 |
| H          | -6.162949 | 1.076298  | -2.577461 |
| H          | -4.961314 | 1.872095  | -1.544937 |
| 1SA2MA4DMA |           |           |           |
| S          | 1.563632  | -1.466669 | -0.563519 |
| O          | 0.962360  | -2.398938 | 0.395744  |
| O          | 3.007289  | -1.551335 | -0.696362 |
| O          | 1.000087  | -1.841414 | -2.008272 |

|   |           |           |           |
|---|-----------|-----------|-----------|
| O | 1.135157  | -0.059169 | -0.301662 |
| H | 0.046805  | -2.114522 | -1.935397 |
| H | 4.192484  | 1.148177  | -0.724066 |
| O | -4.064185 | -3.587563 | -2.065505 |
| O | -1.359418 | -3.629168 | 0.289161  |
| O | -4.046879 | -1.225815 | -0.384528 |
| O | -1.540176 | -2.682181 | -1.749352 |
| O | -4.415808 | -1.546183 | 1.807762  |
| C | -3.419520 | -3.896630 | -0.858692 |
| C | -4.224191 | -3.470301 | 0.390799  |
| C | -1.994459 | -3.338413 | -0.825706 |
| C | -4.240680 | -1.986603 | 0.682047  |
| H | -3.328831 | -4.987081 | -0.820835 |
| H | -3.850232 | -3.966724 | 1.286064  |
| H | -5.259017 | -3.791836 | 0.237385  |
| H | -3.848000 | -2.669941 | -2.274057 |
| H | -0.459725 | -3.188489 | 0.316807  |
| H | -4.000437 | -0.260161 | -0.119010 |
| O | -3.140672 | 3.982701  | 0.762116  |
| O | -3.827357 | 0.961807  | 2.533345  |
| O | -0.710564 | 0.967048  | 1.363179  |
| O | -3.744103 | 1.298784  | 0.311725  |
| O | 0.228984  | 2.907581  | 0.721324  |
| C | -3.012007 | 3.067492  | 1.799787  |
| C | -1.556661 | 2.940999  | 2.348797  |
| C | -3.569395 | 1.682719  | 1.463169  |
| C | -0.579436 | 2.293221  | 1.389938  |
| H | -3.613501 | 3.439863  | 2.634986  |
| H | -1.578190 | 2.356152  | 3.270981  |
| H | -1.209348 | 3.951984  | 2.557310  |
| H | -2.755368 | 3.642485  | -0.087613 |
| H | -4.101562 | 0.037010  | 2.277509  |
| H | -0.055058 | 0.565368  | 0.734384  |
| C | 3.264897  | 2.963345  | -0.218047 |
| N | 3.254273  | 1.648404  | -0.910365 |
| C | 3.026738  | 1.735446  | -2.374988 |
| H | 4.006602  | 3.609746  | -0.688767 |
| H | 3.533695  | 2.802651  | 0.825753  |
| H | 2.273102  | 3.407609  | -0.257065 |
| H | 2.493921  | 1.048069  | -0.526220 |
| H | 3.840160  | 2.296294  | -2.836480 |
| H | 2.077230  | 2.233784  | -2.566802 |
| H | 2.993182  | 0.724899  | -2.778046 |
| C | 6.068149  | -0.503286 | -1.494247 |

|        |           |           |           |
|--------|-----------|-----------|-----------|
| N      | 5.714528  | 0.406231  | -0.394795 |
| C      | 6.821626  | 1.294366  | -0.026103 |
| H      | 6.257286  | 0.068822  | -2.408412 |
| H      | 5.236152  | -1.185242 | -1.671524 |
| H      | 6.971502  | -1.091292 | -1.277098 |
| H      | 5.458679  | -0.167627 | 0.423802  |
| H      | 7.051854  | 1.974356  | -0.852399 |
| H      | 7.742090  | 0.744864  | 0.219414  |
| H      | 6.542594  | 1.894533  | 0.843074  |
| C      | -3.577899 | 3.678614  | -2.533562 |
| N      | -2.439929 | 3.141728  | -1.786034 |
| C      | -1.147911 | 3.390979  | -2.420999 |
| H      | -3.505916 | 4.769489  | -2.567606 |
| H      | -4.500626 | 3.419159  | -2.012275 |
| H      | -3.634857 | 3.306908  | -3.568436 |
| H      | -2.575185 | 2.146824  | -1.639536 |
| H      | -0.961556 | 4.468164  | -2.448416 |
| H      | -1.089258 | 3.008444  | -3.452575 |
| H      | -0.363379 | 2.929310  | -1.819892 |
| C      | 5.607670  | -2.433714 | 2.403816  |
| N      | 4.708696  | -1.426333 | 1.843362  |
| C      | 3.844073  | -0.817737 | 2.854912  |
| H      | 6.329267  | -1.956103 | 3.075114  |
| H      | 6.166163  | -2.916927 | 1.598963  |
| H      | 5.083529  | -3.215300 | 2.977916  |
| H      | 4.122339  | -1.845775 | 1.124588  |
| H      | 4.445193  | -0.216754 | 3.545538  |
| H      | 3.282862  | -1.555546 | 3.449725  |
| H      | 3.118613  | -0.161352 | 2.369436  |
| ISA3MA |           |           |           |
| S      | 3.972804  | -0.916547 | 1.077389  |
| O      | 4.492691  | -0.679407 | 2.380216  |
| O      | 2.550852  | -0.574546 | 0.846165  |
| O      | 4.800209  | -0.182605 | -0.032219 |
| O      | 4.190097  | -2.398109 | 0.690694  |
| H      | 4.537048  | 0.791111  | -0.063327 |
| H      | 3.552391  | -2.708621 | -0.035706 |
| O      | -0.369607 | -5.137252 | 0.319148  |
| O      | -2.368890 | -2.806863 | -1.528984 |
| O      | 0.669140  | -2.196874 | -0.265614 |
| O      | -2.213609 | -3.264990 | 0.671267  |
| O      | 2.472626  | -3.317550 | -1.004643 |
| C      | -0.871483 | -4.532774 | -0.847064 |
| C      | 0.296124  | -4.034119 | -1.716066 |

|            |           |           |           |
|------------|-----------|-----------|-----------|
| C          | -1.881581 | -3.446050 | -0.494596 |
| C          | 1.262138  | -3.156488 | -0.956323 |
| H          | -1.431422 | -5.265900 | -1.446224 |
| H          | -0.091347 | -3.472556 | -2.570865 |
| H          | 0.859372  | -4.888554 | -2.087950 |
| H          | -0.865914 | -4.763534 | 1.061672  |
| H          | -3.059581 | -2.143162 | -1.240941 |
| H          | 1.337148  | -1.631125 | 0.193897  |
| O          | -5.611056 | 1.189675  | -0.356919 |
| O          | -3.639351 | -1.166987 | 1.488755  |
| O          | -2.621450 | 1.580773  | -0.112822 |
| O          | -4.169671 | -1.029895 | -0.696378 |
| O          | -2.669568 | 3.402235  | 1.200568  |
| C          | -5.054948 | 0.618186  | 0.800726  |
| C          | -4.267928 | 1.666137  | 1.602117  |
| C          | -4.225337 | -0.612405 | 0.454138  |
| C          | -3.113719 | 2.311770  | 0.868583  |
| H          | -5.860598 | 0.253125  | 1.454174  |
| H          | -3.863410 | 1.214682  | 2.513343  |
| H          | -4.942643 | 2.465806  | 1.909673  |
| H          | -5.289378 | 0.668042  | -1.105690 |
| H          | -3.121218 | -1.973628 | 1.209609  |
| H          | -1.886333 | 2.065796  | -0.582291 |
| O          | 1.624056  | 3.528715  | -2.497836 |
| O          | -0.384404 | 4.408539  | 0.334086  |
| O          | 1.831842  | 2.028492  | 0.422637  |
| O          | -0.649860 | 2.899127  | -1.316507 |
| O          | 3.991401  | 2.305813  | -0.147490 |
| C          | 1.312413  | 4.259742  | -1.336543 |
| C          | 2.484474  | 4.168586  | -0.341744 |
| C          | -0.011531 | 3.780371  | -0.749654 |
| C          | 2.857766  | 2.740166  | -0.021653 |
| H          | 1.168991  | 5.322306  | -1.578678 |
| H          | 2.220977  | 4.682056  | 0.586911  |
| H          | 3.359836  | 4.647992  | -0.776654 |
| H          | 0.858611  | 2.964480  | -2.680875 |
| H          | -1.265731 | 4.055815  | 0.664657  |
| H          | 2.096435  | 1.095563  | 0.612529  |
| 1SA3MA1DMA |           |           |           |
| S          | 0.313283  | -2.807564 | 0.480753  |
| O          | -0.655278 | -3.902001 | 0.552510  |
| O          | 1.718929  | -3.246181 | 0.460331  |
| O          | 0.124893  | -2.101634 | -0.938798 |
| O          | 0.089294  | -1.778237 | 1.513756  |

|   |           |           |           |
|---|-----------|-----------|-----------|
| H | -0.847651 | -1.999473 | -1.115247 |
| H | 1.517181  | -1.275744 | 2.120667  |
| O | -5.131690 | -1.733700 | -2.222853 |
| O | -3.224494 | -3.469413 | 0.177440  |
| O | -4.544931 | 0.793140  | -0.974811 |
| O | -2.537346 | -1.892305 | -1.287377 |
| O | -3.882565 | 0.504074  | 1.152969  |
| C | -4.887177 | -2.166610 | -0.912679 |
| C | -5.331916 | -1.137227 | 0.165975  |
| C | -3.412761 | -2.513793 | -0.700397 |
| C | -4.513049 | 0.132275  | 0.172290  |
| H | -5.476651 | -3.071883 | -0.762426 |
| H | -5.268645 | -1.579277 | 1.159928  |
| H | -6.371324 | -0.880098 | -0.053423 |
| H | -4.560024 | -0.973875 | -2.392298 |
| H | -2.247139 | -3.637806 | 0.338884  |
| H | -3.979290 | 1.612236  | -0.917388 |
| O | 5.638369  | 0.489809  | -1.147009 |
| O | 3.339246  | -2.240075 | -1.321999 |
| O | 2.432268  | 0.738040  | -0.810048 |
| O | 4.342226  | -1.203486 | 0.415557  |
| O | 2.575136  | 2.347754  | -2.365146 |
| C | 4.807773  | -0.439825 | -1.803623 |
| C | 3.795810  | 0.299508  | -2.697377 |
| C | 4.121839  | -1.347507 | -0.783386 |
| C | 2.885406  | 1.242183  | -1.943954 |
| H | 5.406703  | -1.091486 | -2.454504 |
| H | 3.163106  | -0.431633 | -3.209904 |
| H | 4.330321  | 0.881253  | -3.447330 |
| H | 5.605529  | 0.253828  | -0.208333 |
| H | 2.759981  | -2.702861 | -0.640972 |
| H | 1.834701  | 1.387455  | -0.342573 |
| O | -0.239485 | 4.215901  | 2.268833  |
| O | 1.005818  | 4.057149  | -1.071251 |
| O | -2.362255 | 2.649365  | 1.337895  |
| O | 0.972042  | 2.474063  | 0.529226  |
| O | -3.046248 | 3.010645  | -0.771107 |
| C | -0.217698 | 4.540594  | 0.906794  |
| C | -1.625570 | 4.644697  | 0.265920  |
| C | 0.659918  | 3.578571  | 0.101985  |
| C | -2.412101 | 3.351406  | 0.214422  |
| H | 0.244373  | 5.527284  | 0.825674  |
| H | -1.557898 | 5.030867  | -0.750264 |
| H | -2.200015 | 5.353499  | 0.870414  |

|            |           |           |           |
|------------|-----------|-----------|-----------|
| H          | -0.733916 | 3.390562  | 2.361145  |
| H          | 1.580800  | 3.406992  | -1.578062 |
| H          | -2.919231 | 1.815109  | 1.262089  |
| C          | 2.473668  | 0.305034  | 3.105942  |
| N          | 2.475212  | -1.056519 | 2.510763  |
| C          | 2.846762  | -2.150336 | 3.446974  |
| H          | 1.803932  | 0.315873  | 3.965641  |
| H          | 2.117428  | 1.019399  | 2.364863  |
| H          | 3.483426  | 0.566337  | 3.422460  |
| H          | 3.126340  | -1.096504 | 1.703616  |
| H          | 2.131189  | -2.176442 | 4.268138  |
| H          | 3.852420  | -1.977720 | 3.830180  |
| H          | 2.808484  | -3.086291 | 2.893373  |
| 1SA3MA2DMA |           |           |           |
| S          | -0.104346 | -3.390891 | 0.524634  |
| O          | 0.937840  | -3.772685 | -0.620710 |
| O          | -1.314806 | -4.116415 | 0.159732  |
| O          | 0.472795  | -3.807390 | 1.811114  |
| O          | -0.249934 | -1.914266 | 0.464510  |
| H          | 1.433906  | -2.639559 | 2.454635  |
| H          | -0.166100 | -1.199498 | -1.064599 |
| O          | 5.782589  | -0.225674 | -0.440182 |
| O          | 2.733004  | -1.955332 | -1.157744 |
| O          | 4.139174  | 2.426440  | -1.191713 |
| O          | 3.754393  | -1.299332 | 0.746680  |
| O          | 2.278814  | 1.191999  | -1.366328 |
| C          | 4.814031  | -0.765981 | -1.303262 |
| C          | 4.310158  | 0.323261  | -2.289424 |
| C          | 3.651487  | -1.405670 | -0.504781 |
| C          | 3.486106  | 1.362409  | -1.584510 |
| H          | 5.255403  | -1.560489 | -1.918426 |
| H          | 3.691968  | -0.151621 | -3.051328 |
| H          | 5.181910  | 0.789357  | -2.748215 |
| H          | 5.436271  | -0.409859 | 0.448387  |
| H          | 1.677257  | -3.090000 | -0.677752 |
| H          | 3.547631  | 3.036828  | -0.669730 |
| O          | -5.649865 | -0.673411 | -1.749885 |
| O          | -3.653212 | -2.936313 | 0.124334  |
| O          | -4.094124 | 1.339776  | -0.499965 |
| O          | -3.067376 | -1.620278 | -1.616939 |
| O          | -3.630322 | 1.072919  | 1.678650  |
| C          | -5.225817 | -1.325987 | -0.582739 |
| C          | -5.226151 | -0.408792 | 0.669122  |
| C          | -3.853292 | -1.985952 | -0.762977 |

|            |           |           |           |
|------------|-----------|-----------|-----------|
| C          | -4.231808 | 0.728488  | 0.669449  |
| H          | -5.947181 | -2.121586 | -0.386117 |
| H          | -5.053864 | -0.993000 | 1.572603  |
| H          | -6.222230 | 0.041633  | 0.735078  |
| H          | -4.917169 | -0.120238 | -2.046624 |
| H          | -2.737174 | -3.341164 | 0.064131  |
| H          | -3.446951 | 2.090911  | -0.418779 |
| O          | -0.697604 | 5.415266  | -0.484013 |
| O          | -1.934186 | 3.079414  | 1.937047  |
| O          | 0.783876  | 2.611740  | 0.260061  |
| O          | -2.339440 | 3.359569  | -0.259474 |
| O          | 2.528716  | 4.022028  | 0.284403  |
| C          | -0.866012 | 4.900923  | 0.815187  |
| C          | 0.513124  | 4.647903  | 1.442781  |
| C          | -1.775270 | 3.675180  | 0.784609  |
| C          | 1.383590  | 3.744482  | 0.598879  |
| H          | -1.388330 | 5.629539  | 1.454209  |
| H          | 0.388903  | 4.194716  | 2.430260  |
| H          | 1.035165  | 5.596913  | 1.555600  |
| H          | -1.345252 | 4.963100  | -1.043636 |
| H          | -2.574287 | 2.307941  | 1.849630  |
| H          | 1.383485  | 2.077003  | -0.339373 |
| C          | -0.031895 | -1.755685 | -3.067145 |
| N          | 0.094055  | -0.745978 | -1.976948 |
| C          | -0.740360 | 0.466949  | -2.195890 |
| H          | -1.065880 | -2.093344 | -3.091072 |
| H          | 0.628143  | -2.588546 | -2.841984 |
| H          | 0.245379  | -1.292577 | -4.014433 |
| H          | 1.079825  | -0.476207 | -1.856168 |
| H          | -1.776905 | 0.152161  | -2.285723 |
| H          | -0.405901 | 0.969979  | -3.103026 |
| H          | -0.628306 | 1.137397  | -1.347063 |
| C          | 1.322690  | -0.678085 | 3.139694  |
| N          | 2.099515  | -1.884692 | 2.763902  |
| C          | 2.982192  | -2.413546 | 3.830172  |
| H          | 0.713864  | -0.895569 | 4.017766  |
| H          | 0.674248  | -0.423507 | 2.303844  |
| H          | 2.007683  | 0.142168  | 3.356511  |
| H          | 2.692524  | -1.668828 | 1.910955  |
| H          | 2.384713  | -2.691624 | 4.698690  |
| H          | 3.713445  | -1.654861 | 4.109662  |
| H          | 3.499074  | -3.292439 | 3.447640  |
| 1SA3MA3DMA |           |           |           |
| S          | -0.391064 | -3.501151 | 0.313119  |



|   |           |           |           |
|---|-----------|-----------|-----------|
| O | 0.800702  | -4.191197 | -0.451678 |
| O | -1.603952 | -3.881400 | -0.430608 |
| O | -0.363518 | -3.984953 | 1.697114  |
| O | -0.136494 | -2.038290 | 0.244269  |
| H | 0.972908  | -3.178293 | 2.398082  |
| H | -0.400198 | -1.559474 | -1.343095 |
| O | 5.702359  | -1.129727 | -0.310599 |
| O | 2.626644  | -2.650354 | -1.273735 |
| O | 4.314189  | 1.646635  | -0.470688 |
| O | 3.499280  | -2.046164 | 0.721064  |
| O | 2.299272  | 0.855543  | -1.048587 |
| C | 4.688805  | -1.432289 | -1.234362 |
| C | 4.249654  | -0.157455 | -2.015742 |
| C | 3.487024  | -2.110501 | -0.537700 |
| C | 3.531365  | 0.832430  | -1.142134 |
| H | 5.072758  | -2.133349 | -1.982982 |
| H | 3.580695  | -0.452331 | -2.823815 |
| H | 5.153063  | 0.300574  | -2.420463 |
| H | 5.286910  | -1.270645 | 0.555268  |
| H | 1.544469  | -3.518943 | -0.719061 |
| H | 3.770124  | 2.237616  | 0.120130  |
| O | -5.845224 | -0.131556 | -1.616261 |
| O | -3.898383 | -2.703790 | -0.068464 |
| O | -3.846072 | 1.271542  | -0.133337 |
| O | -3.472384 | -1.425759 | -1.881902 |
| O | -3.798951 | 0.939440  | 2.085784  |
| C | -5.461798 | -1.008210 | -0.591402 |
| C | -5.365883 | -0.328348 | 0.794841  |
| C | -4.162213 | -1.747088 | -0.926016 |
| C | -4.255019 | 0.681785  | 0.982210  |
| H | -6.246537 | -1.765830 | -0.517253 |
| H | -5.261587 | -1.071377 | 1.585415  |
| H | -6.307363 | 0.205268  | 0.961634  |
| H | -5.074698 | 0.410830  | -1.824922 |
| H | -3.013223 | -3.159623 | -0.236210 |
| H | -3.134013 | 1.948947  | 0.069803  |
| O | -0.208572 | 5.201254  | 0.626393  |
| O | -1.865812 | 2.702598  | 2.592772  |
| O | 0.976978  | 1.896420  | 1.010955  |
| O | -1.952325 | 3.059327  | 0.373249  |
| O | 2.797289  | 3.208729  | 1.115434  |
| C | -0.450127 | 4.400492  | 1.734603  |
| C | 0.843901  | 3.826077  | 2.378657  |
| C | -1.493817 | 3.306214  | 1.480512  |

|            |           |           |           |
|------------|-----------|-----------|-----------|
| C          | 1.646555  | 2.957229  | 1.443828  |
| H          | -0.901996 | 5.040950  | 2.500449  |
| H          | 0.574094  | 3.234092  | 3.257484  |
| H          | 1.475749  | 4.658530  | 2.683515  |
| H          | 0.107366  | 4.668406  | -0.149887 |
| H          | -2.576709 | 2.025954  | 2.408375  |
| H          | 1.491333  | 1.442168  | 0.285394  |
| C          | -0.516771 | 0.031653  | -2.683470 |
| N          | -0.738236 | -1.392406 | -2.325876 |
| C          | -0.084637 | -2.376685 | -3.232694 |
| H          | 0.543653  | 0.258940  | -2.590450 |
| H          | -1.083823 | 0.649691  | -1.988263 |
| H          | -0.868604 | 0.208558  | -3.699880 |
| H          | -1.758880 | -1.571694 | -2.270872 |
| H          | 0.995822  | -2.286346 | -3.132037 |
| H          | -0.401590 | -2.185377 | -4.258101 |
| H          | -0.390512 | -3.373887 | -2.922301 |
| C          | 1.272813  | -1.277950 | 3.162278  |
| N          | 1.786869  | -2.592343 | 2.699633  |
| C          | 2.591331  | -3.332713 | 3.700367  |
| H          | 0.644615  | -1.422095 | 4.041716  |
| H          | 0.686036  | -0.845433 | 2.354663  |
| H          | 2.114208  | -0.629459 | 3.406612  |
| H          | 2.383045  | -2.432478 | 1.835806  |
| H          | 1.987046  | -3.530181 | 4.586063  |
| H          | 3.466248  | -2.742059 | 3.971483  |
| H          | 2.912686  | -4.275365 | 3.259657  |
| C          | -0.374771 | 4.232888  | -2.648719 |
| N          | 0.740267  | 4.049304  | -1.715708 |
| C          | 1.936752  | 4.814361  | -2.079794 |
| H          | -0.683726 | 5.280976  | -2.634301 |
| H          | -1.223940 | 3.635179  | -2.315005 |
| H          | -0.121733 | 3.965426  | -3.686005 |
| H          | 0.978560  | 3.063701  | -1.661192 |
| H          | 1.713256  | 5.882132  | -2.015014 |
| H          | 2.294840  | 4.600273  | -3.098032 |
| H          | 2.735170  | 4.594819  | -1.369629 |
| 1SA3MA4DMA |           |           |           |
| S          | -2.221874 | 2.919154  | 1.032245  |
| O          | -2.400729 | 4.340077  | 1.113236  |
| O          | -3.355345 | 2.386039  | 0.043364  |
| O          | -0.921478 | 2.507239  | 0.397154  |
| O          | -2.382433 | 2.164051  | 2.297450  |
| H          | 0.055214  | 1.536378  | -1.685488 |

|   |           |           |           |
|---|-----------|-----------|-----------|
| H | -1.244346 | 0.956058  | 2.420183  |
| O | -2.173261 | -3.179375 | -2.315422 |
| O | -0.784326 | -3.757959 | 0.937782  |
| O | -3.618871 | -0.241261 | -0.186412 |
| O | 0.149655  | -3.441067 | -1.085972 |
| O | -1.484438 | -0.934599 | -0.102738 |
| C | -2.237820 | -3.517356 | -0.940050 |
| C | -3.206726 | -2.589464 | -0.212165 |
| C | -0.834900 | -3.526604 | -0.352356 |
| C | -2.747595 | -1.129068 | -0.172950 |
| H | -2.602447 | -4.550623 | -0.830520 |
| H | -3.319511 | -2.929709 | 0.821755  |
| H | -4.188707 | -2.649669 | -0.682490 |
| H | -1.248514 | -3.291303 | -2.578780 |
| H | 0.164278  | -3.768235 | 1.247989  |
| H | -3.395782 | 1.382366  | 0.026488  |
| O | 3.659263  | 4.097699  | -2.427657 |
| O | 1.027782  | 4.101184  | -0.048752 |
| O | 4.739657  | 1.830424  | -0.965820 |
| O | 1.545925  | 2.568377  | -1.620579 |
| O | 4.010478  | 1.802164  | 1.158195  |
| C | 3.118484  | 4.313412  | -1.153339 |
| C | 4.085257  | 3.903615  | -0.003004 |
| C | 1.787733  | 3.580990  | -0.971741 |
| C | 4.275542  | 2.412468  | 0.127630  |
| H | 2.938235  | 5.385135  | -1.057234 |
| H | 3.716664  | 4.276806  | 0.951527  |
| H | 5.052679  | 4.360717  | -0.226037 |
| H | 3.659864  | 3.144481  | -2.581760 |
| H | 0.194545  | 3.533797  | 0.123652  |
| H | 4.801055  | 0.844385  | -0.834675 |
| O | 5.528793  | -3.482737 | -0.444048 |
| O | 4.509207  | -0.743402 | 1.649089  |
| O | 2.667734  | -3.406181 | -0.284137 |
| O | 4.920277  | -0.825303 | -0.562755 |
| O | 1.747341  | -3.659427 | 1.748453  |
| C | 5.208300  | -2.831835 | 0.753371  |
| C | 4.135062  | -3.562369 | 1.589332  |
| C | 4.860925  | -1.356805 | 0.532939  |
| C | 2.731920  | -3.542916 | 1.031182  |
| H | 6.124295  | -2.830777 | 1.353739  |
| H | 4.087080  | -3.165073 | 2.602740  |
| H | 4.436020  | -4.612705 | 1.658724  |
| H | 4.796832  | -3.343203 | -1.056941 |

|        |           |           |           |
|--------|-----------|-----------|-----------|
| H      | 4.322385  | 0.225845  | 1.468084  |
| H      | 1.712938  | -3.425128 | -0.594385 |
| C      | -1.683013 | 1.620181  | -2.811558 |
| N      | -0.630967 | 0.863099  | -2.069295 |
| C      | 0.087316  | -0.129403 | -2.909350 |
| H      | -1.191996 | 2.239973  | -3.562493 |
| H      | -2.217985 | 2.243026  | -2.098874 |
| H      | -2.356364 | 0.903782  | -3.287849 |
| H      | -1.044886 | 0.357074  | -1.256070 |
| H      | 0.607672  | 0.390886  | -3.712546 |
| H      | -0.642109 | -0.825622 | -3.317845 |
| H      | 0.802858  | -0.665441 | -2.288367 |
| C      | 0.787257  | 0.457752  | 2.368416  |
| N      | -0.649998 | 0.088358  | 2.362076  |
| C      | -1.055968 | -0.856175 | 3.438816  |
| H      | 1.028968  | 0.940499  | 3.315072  |
| H      | 0.966329  | 1.154198  | 1.553592  |
| H      | 1.396599  | -0.438249 | 2.250573  |
| H      | -0.904144 | -0.315430 | 1.433473  |
| H      | -0.716727 | -0.462270 | 4.397428  |
| H      | -0.598178 | -1.828213 | 3.257466  |
| H      | -2.147856 | -0.920974 | 3.441844  |
| C      | -4.950729 | -0.512965 | -3.560061 |
| N      | -3.650753 | -0.952888 | -4.065350 |
| C      | -3.690528 | -1.327246 | -5.474944 |
| H      | -5.240812 | 0.420960  | -4.052200 |
| H      | -4.880996 | -0.321538 | -2.487646 |
| H      | -5.758981 | -1.243656 | -3.736068 |
| H      | -3.326349 | -1.743450 | -3.515003 |
| H      | -3.908119 | -0.445820 | -6.086621 |
| H      | -4.452905 | -2.089762 | -5.711055 |
| H      | -2.716169 | -1.713865 | -5.785253 |
| C      | -5.481769 | -0.417753 | 2.838956  |
| N      | -4.301485 | 0.067484  | 3.551000  |
| C      | -4.586114 | 0.412104  | 4.940121  |
| H      | -5.782738 | -1.392424 | 3.238997  |
| H      | -5.243300 | -0.536174 | 1.780779  |
| H      | -6.350917 | 0.256941  | 2.923672  |
| H      | -3.934926 | 0.888294  | 3.074386  |
| H      | -4.845237 | -0.491246 | 5.502919  |
| H      | -5.419671 | 1.125632  | 5.055945  |
| H      | -3.699080 | 0.853570  | 5.401312  |
| 1SA4MA |           |           |           |
| S      | 4.607970  | -0.169298 | 0.561163  |

|   |           |           |           |
|---|-----------|-----------|-----------|
| O | 4.871603  | -1.083902 | 1.647172  |
| O | 5.492624  | 0.947093  | 0.341696  |
| O | 4.565535  | -0.967871 | -0.786226 |
| O | 3.149074  | 0.344014  | 0.773176  |
| H | 4.181867  | -1.884105 | -0.631052 |
| H | 2.996258  | 1.207016  | 0.265573  |
| O | 1.509116  | 3.213456  | -3.276995 |
| O | 0.603277  | 5.006889  | -0.311338 |
| O | 4.831948  | 3.165567  | -1.172143 |
| O | -0.183011 | 3.105754  | -1.230298 |
| O | 2.774724  | 2.557020  | -0.497005 |
| C | 1.561171  | 4.285536  | -2.368727 |
| C | 3.001494  | 4.493908  | -1.881007 |
| C | 0.576041  | 4.067332  | -1.224387 |
| C | 3.524073  | 3.300880  | -1.120331 |
| H | 1.244895  | 5.213454  | -2.865937 |
| H | 3.056517  | 5.362766  | -1.217560 |
| H | 3.651428  | 4.686705  | -2.735040 |
| H | 0.838072  | 2.601120  | -2.941652 |
| H | -0.069035 | 4.818036  | 0.408232  |
| H | 5.124457  | 2.391612  | -0.633865 |
| O | 2.197464  | -5.623935 | -0.534553 |
| O | 3.278728  | -3.268723 | 1.938531  |
| O | 0.388957  | -3.160100 | 0.089031  |
| O | 3.542342  | -3.345313 | -0.302063 |
| O | -1.209038 | -4.685926 | 0.501008  |
| C | 2.340062  | -5.113491 | 0.768200  |
| C | 0.965279  | -5.015376 | 1.452696  |
| C | 3.105388  | -3.796609 | 0.749528  |
| C | -0.064145 | -4.277174 | 0.626495  |
| H | 2.955691  | -5.795334 | 1.372362  |
| H | 1.064788  | -4.513011 | 2.419413  |
| H | 0.577924  | -6.018131 | 1.627671  |
| H | 2.646417  | -5.003941 | -1.126830 |
| H | 3.838676  | -2.453111 | 1.891839  |
| H | -0.313270 | -2.731533 | -0.476040 |
| O | -2.025624 | 1.803772  | 3.649855  |
| O | -1.497500 | 2.300988  | 0.957866  |
| O | -4.114780 | 0.724176  | 2.049998  |
| O | -1.133204 | 4.428562  | 1.601345  |
| O | -4.794162 | 2.257418  | 0.550448  |
| C | -2.446623 | 2.992797  | 3.029370  |
| C | -3.958914 | 3.002237  | 2.679772  |
| C | -1.613367 | 3.319263  | 1.786524  |

|   |           |           |           |
|---|-----------|-----------|-----------|
| C | -4.339321 | 1.967226  | 1.645817  |
| H | -2.260980 | 3.801317  | 3.736626  |
| H | -4.255254 | 3.981727  | 2.304015  |
| H | -4.499972 | 2.791564  | 3.605698  |
| H | -2.359260 | 1.058188  | 3.133061  |
| H | -1.009568 | 2.572556  | 0.130691  |
| H | -4.333822 | 0.068742  | 1.322899  |
| O | -5.674413 | -2.873567 | -1.720286 |
| O | -5.073252 | 0.550190  | -1.477656 |
| O | -3.051455 | -3.692569 | -1.107943 |
| O | -4.630274 | -0.992618 | 0.102937  |
| O | -1.505637 | -2.107927 | -1.496089 |
| C | -4.990654 | -1.730733 | -2.159503 |
| C | -3.575258 | -2.030171 | -2.720025 |
| C | -4.888929 | -0.679702 | -1.052615 |
| C | -2.602536 | -2.601080 | -1.709996 |
| H | -5.582368 | -1.301019 | -2.968666 |
| H | -3.131185 | -1.127390 | -3.139912 |
| H | -3.700206 | -2.767143 | -3.518542 |
| H | -5.108255 | -3.333520 | -1.086176 |
| H | -4.979551 | 1.202390  | -0.725362 |
| H | -2.368650 | -4.048838 | -0.464641 |

#### 1SA4MA1DMA

|   |           |           |           |
|---|-----------|-----------|-----------|
| S | 0.632533  | -2.533313 | 1.618986  |
| O | -0.531893 | -2.532194 | 2.509371  |
| O | 1.838408  | -3.080862 | 2.211868  |
| O | 0.234780  | -3.470888 | 0.366389  |
| O | 0.848827  | -1.216935 | 0.963436  |
| H | -0.581542 | -3.986485 | 0.581368  |
| H | 2.107384  | -0.641443 | -1.892591 |
| O | 5.030522  | -1.630692 | -2.788178 |
| O | 5.336708  | 1.487444  | -1.124799 |
| O | 4.337318  | -2.530484 | 1.301742  |
| O | 3.466346  | 0.558947  | -1.928550 |
| O | 3.394900  | -2.366293 | -0.724719 |
| C | 5.501539  | -0.789062 | -1.764935 |
| C | 5.623926  | -1.506536 | -0.400039 |
| C | 4.646679  | 0.475839  | -1.624824 |
| C | 4.332801  | -2.170044 | 0.040469  |
| H | 6.497844  | -0.450237 | -2.057260 |
| H | 5.941817  | -0.816751 | 0.382584  |
| H | 6.386946  | -2.286678 | -0.485788 |
| H | 4.265370  | -2.089774 | -2.409052 |
| H | 4.712241  | 2.221405  | -0.906774 |

|   |           |           |           |
|---|-----------|-----------|-----------|
| H | 3.433843  | -2.835891 | 1.577286  |
| O | -4.770041 | -5.196165 | 0.062248  |
| O | -2.941730 | -2.535101 | 1.517316  |
| O | -3.874940 | -0.962887 | -1.884150 |
| O | -2.250801 | -4.493015 | 0.636818  |
| O | -5.307270 | -0.986007 | -0.151606 |
| C | -4.508842 | -3.827006 | 0.261974  |
| C | -4.602872 | -3.077214 | -1.090084 |
| C | -3.112603 | -3.647497 | 0.849462  |
| C | -4.627257 | -1.573517 | -0.981462 |
| H | -5.248249 | -3.416906 | 0.951120  |
| H | -5.549294 | -3.386020 | -1.543984 |
| H | -3.799806 | -3.394669 | -1.756829 |
| H | -3.907808 | -5.627644 | -0.025182 |
| H | -2.011437 | -2.484072 | 1.907050  |
| H | -4.005589 | 0.024183  | -1.826860 |
| O | -4.214616 | 4.375426  | -1.699888 |
| O | -5.214063 | 1.601570  | 0.333281  |
| O | -1.959128 | 3.250964  | -0.214020 |
| O | -4.220074 | 1.692735  | -1.686762 |
| O | -1.721164 | 4.740677  | 1.447784  |
| C | -4.687372 | 3.746759  | -0.535618 |
| C | -3.934478 | 4.221479  | 0.721591  |
| C | -4.677758 | 2.229070  | -0.684942 |
| C | -2.428842 | 4.100994  | 0.681787  |
| H | -5.739631 | 4.022240  | -0.394744 |
| H | -4.286143 | 3.675054  | 1.602325  |
| H | -4.154553 | 5.275958  | 0.895587  |
| H | -3.734515 | 3.701767  | -2.200662 |
| H | -5.244327 | 0.610793  | 0.170140  |
| H | -0.964533 | 3.273151  | -0.220568 |
| O | 3.376445  | 3.294670  | -0.525233 |
| O | 0.874309  | 4.511421  | 1.696321  |
| O | 1.695203  | 1.195182  | 1.818014  |
| O | 0.740984  | 3.376840  | -0.246327 |
| O | 3.810293  | 0.525608  | 1.424290  |
| C | 2.897580  | 3.748288  | 0.733107  |
| C | 3.383949  | 2.849070  | 1.890524  |
| C | 1.377882  | 3.858040  | 0.687412  |
| C | 3.009732  | 1.389243  | 1.691474  |
| H | 3.286047  | 4.756619  | 0.901801  |
| H | 2.954599  | 3.217945  | 2.824659  |
| H | 4.470218  | 2.911062  | 1.946896  |
| H | 2.624460  | 2.922402  | -1.013675 |

|   |           |           |           |
|---|-----------|-----------|-----------|
| H | -0.127882 | 4.587034  | 1.619221  |
| H | 1.458286  | 0.251372  | 1.622766  |
| C | 0.200251  | 0.143536  | -2.028053 |
| N | 1.136207  | -0.981364 | -1.764652 |
| C | 0.900632  | -2.188021 | -2.601312 |
| H | 0.300888  | 0.461686  | -3.065279 |
| H | 0.454174  | 0.967721  | -1.364304 |
| H | -0.820306 | -0.185665 | -1.835201 |
| H | 1.069882  | -1.233585 | -0.754330 |
| H | 1.083733  | -1.939097 | -3.646686 |
| H | -0.128442 | -2.515819 | -2.466323 |
| H | 1.578079  | -2.967326 | -2.264285 |

#### 1SA4MA2DMA

|   |           |           |           |
|---|-----------|-----------|-----------|
| S | 3.090596  | 1.330630  | 2.172625  |
| O | 2.924802  | 0.072263  | 2.906911  |
| O | 2.570980  | 2.516355  | 2.828998  |
| O | 4.661719  | 1.593530  | 2.023377  |
| O | 2.584759  | 1.185628  | 0.772655  |
| H | 5.065273  | 0.749987  | 1.688321  |
| H | 0.368543  | -1.378663 | 0.523261  |
| O | -0.009631 | 3.697366  | -2.329888 |
| O | -2.874105 | 4.656632  | -0.405719 |
| O | 1.569837  | 4.368952  | 1.147166  |
| O | -2.368463 | 2.797266  | -1.570939 |
| O | -0.299829 | 3.149973  | 0.831468  |
| C | -0.804037 | 4.603912  | -1.588064 |
| C | 0.002003  | 5.176607  | -0.422471 |
| C | -2.096485 | 3.921396  | -1.153862 |
| C | 0.403369  | 4.109662  | 0.581658  |
| H | -1.113829 | 5.443322  | -2.228033 |
| H | -0.599868 | 5.923087  | 0.104207  |
| H | 0.890095  | 5.680086  | -0.805052 |
| H | -0.593377 | 2.959935  | -2.562111 |
| H | -3.715290 | 4.158902  | -0.174020 |
| H | 1.827163  | 3.665715  | 1.802160  |
| O | 6.072822  | -2.344755 | -1.259149 |
| O | 3.810595  | -2.079856 | 1.525360  |
| O | 3.856601  | -0.984641 | -2.155748 |
| O | 5.411050  | -0.674317 | 0.804729  |
| O | 1.824696  | -1.843449 | -1.796253 |
| C | 5.064425  | -2.766796 | -0.381951 |
| C | 3.754330  | -3.127612 | -1.119532 |
| C | 4.793909  | -1.723636 | 0.712373  |
| C | 3.083381  | -1.895001 | -1.743806 |



|   |           |           |           |
|---|-----------|-----------|-----------|
| H | 5.432384  | -3.661499 | 0.131261  |
| H | 3.058897  | -3.627618 | -0.446882 |
| H | 4.012018  | -3.826936 | -1.920652 |
| H | 5.637207  | -1.684515 | -1.824280 |
| H | 3.569565  | -1.334620 | 2.138831  |
| H | 3.756441  | 0.647010  | -1.974091 |
| O | -1.585502 | -5.785443 | -1.318620 |
| O | 0.435209  | -3.930865 | -1.477496 |
| O | -3.345704 | -3.691168 | -0.493513 |
| O | -0.225711 | -3.075955 | 0.494354  |
| O | -3.513267 | -3.276599 | 1.707383  |
| C | -1.038030 | -5.249929 | -0.136353 |
| C | -2.072504 | -5.056414 | 0.986456  |
| C | -0.227104 | -3.960348 | -0.359806 |
| C | -3.036038 | -3.914752 | 0.780308  |
| H | -0.315753 | -5.997087 | 0.209885  |
| H | -1.588516 | -4.896097 | 1.948462  |
| H | -2.664121 | -5.975429 | 1.052811  |
| H | -2.213768 | -5.139734 | -1.663563 |
| H | 1.006541  | -3.065864 | -1.574665 |
| H | -4.022935 | -2.962394 | -0.569153 |
| O | -6.951260 | 0.173634  | -1.216661 |
| O | -5.197268 | -1.268099 | 1.557290  |
| O | -4.244330 | 1.285924  | -0.431645 |
| O | -5.194167 | -1.750559 | -0.642850 |
| O | -5.037479 | 3.279821  | 0.230664  |
| C | -6.646333 | -0.016230 | 0.142709  |
| C | -6.281331 | 1.319313  | 0.804108  |
| C | -5.582940 | -1.094286 | 0.317284  |
| C | -5.132622 | 2.062624  | 0.162612  |
| H | -7.529934 | -0.404102 | 0.672094  |
| H | -6.025423 | 1.156570  | 1.855675  |
| H | -7.144623 | 1.984777  | 0.779384  |
| H | -6.418845 | -0.465972 | -1.710598 |
| H | -4.550870 | -2.035023 | 1.623770  |
| H | -3.545237 | 1.840807  | -0.877831 |
| C | -0.490945 | 0.098068  | -0.621657 |
| N | 0.236822  | -0.353471 | 0.597764  |
| C | -0.467842 | -0.051210 | 1.877341  |
| H | -1.469815 | -0.380300 | -0.641289 |
| H | 0.094309  | -0.214336 | -1.485215 |
| H | -0.603488 | 1.178229  | -0.582636 |
| H | 1.164575  | 0.110523  | 0.620208  |
| H | -1.415615 | -0.587621 | 1.889433  |

|   |           |           |           |
|---|-----------|-----------|-----------|
| H | -0.623809 | 1.024106  | 1.937671  |
| H | 0.162723  | -0.384057 | 2.699830  |
| C | 5.446915  | 1.737715  | -1.477324 |
| N | 3.967350  | 1.602820  | -1.573578 |
| C | 3.302498  | 2.687426  | -2.339301 |
| H | 5.864787  | 1.776633  | -2.483336 |
| H | 5.836086  | 0.872047  | -0.944942 |
| H | 5.692032  | 2.650644  | -0.935281 |
| H | 3.554383  | 1.559601  | -0.618879 |
| H | 3.628673  | 2.647550  | -3.378471 |
| H | 3.574156  | 3.649333  | -1.904382 |
| H | 2.221970  | 2.571330  | -2.282533 |

#### 1SA4MA3DMA

|   |           |           |           |
|---|-----------|-----------|-----------|
| S | 3.210786  | 1.581422  | -0.616708 |
| O | 2.189913  | 1.690704  | 0.484598  |
| O | 3.142527  | 2.763826  | -1.493387 |
| O | 4.570011  | 1.441580  | -0.004171 |
| O | 2.925584  | 0.327611  | -1.410834 |
| H | 4.484440  | 1.800695  | 1.559554  |
| H | 0.183719  | -1.330894 | -1.945551 |
| O | -2.380275 | 4.847481  | -3.109150 |
| O | -2.561583 | 4.853820  | 0.477792  |
| O | 1.449543  | 4.684067  | -1.240220 |
| O | -3.183464 | 3.291372  | -1.016522 |
| O | -0.137151 | 3.416258  | -2.210350 |
| C | -2.148476 | 5.331082  | -1.815207 |
| C | -0.667365 | 5.671974  | -1.559362 |
| C | -2.686504 | 4.375317  | -0.746653 |
| C | 0.244216  | 4.464684  | -1.703546 |
| H | -2.730138 | 6.252336  | -1.710760 |
| H | -0.523235 | 6.112202  | -0.571534 |
| H | -0.353009 | 6.416037  | -2.297200 |
| H | -1.859766 | 4.033104  | -3.176372 |
| H | -2.919157 | 4.204189  | 1.144316  |
| H | 2.057125  | 3.879981  | -1.353296 |
| O | 2.855793  | -3.067768 | 3.486964  |
| O | 1.326197  | -0.503221 | 1.519983  |
| O | 3.650802  | -2.756769 | 0.796391  |
| O | 2.904622  | -0.360800 | 3.113178  |
| O | 2.184923  | -3.330425 | -0.781674 |
| C | 1.785412  | -2.482259 | 2.787306  |
| C | 1.429989  | -3.261086 | 1.509419  |
| C | 2.071140  | -0.999987 | 2.490007  |
| C | 2.498825  | -3.111402 | 0.424765  |

|   |           |           |           |
|---|-----------|-----------|-----------|
| H | 0.923870  | -2.502581 | 3.464269  |
| H | 0.464191  | -2.949390 | 1.110928  |
| H | 1.348318  | -4.319500 | 1.775136  |
| H | 3.594094  | -3.046601 | 2.858878  |
| H | 1.668769  | 0.399846  | 1.194287  |
| H | 4.479691  | -2.133079 | -0.483730 |
| O | -2.906930 | -4.348596 | -3.185005 |
| O | 0.184061  | -4.674342 | -1.451599 |
| O | -2.844561 | -3.900537 | 1.029553  |
| O | -0.870564 | -2.801502 | -2.133331 |
| O | -4.037951 | -3.267411 | -0.763423 |
| C | -2.031875 | -4.910271 | -2.247114 |
| C | -2.732212 | -5.274162 | -0.908485 |
| C | -0.823432 | -4.011614 | -1.949613 |
| C | -3.271137 | -4.052209 | -0.204768 |
| H | -1.651995 | -5.837591 | -2.679841 |
| H | -2.046842 | -5.808105 | -0.251899 |
| H | -3.581029 | -5.919059 | -1.150167 |
| H | -3.323349 | -3.580403 | -2.771677 |
| H | 0.986188  | -4.064311 | -1.166741 |
| H | -3.231909 | -3.070064 | 1.434111  |
| O | -6.658692 | 0.584565  | 1.778517  |
| O | -5.397032 | -1.327178 | 0.452893  |
| O | -4.123661 | 1.541139  | 0.681871  |
| O | -3.920254 | -1.717375 | 2.104198  |
| O | -3.533657 | 3.064711  | 2.225529  |
| C | -5.567336 | -0.005728 | 2.439940  |
| C | -4.552355 | 1.027299  | 2.965823  |
| C | -4.872235 | -1.104366 | 1.633755  |
| C | -4.021272 | 1.986543  | 1.924077  |
| H | -5.980062 | -0.519656 | 3.314199  |
| H | -3.695492 | 0.510532  | 3.408884  |
| H | -5.012532 | 1.629613  | 3.749763  |
| H | -6.383875 | 0.771348  | 0.872944  |
| H | -4.884635 | -2.041510 | -0.023102 |
| H | -3.760742 | 2.218334  | 0.028989  |
| C | 0.226781  | 0.188484  | -3.352205 |
| N | 0.315221  | -0.304949 | -1.949793 |
| C | -0.718465 | 0.285799  | -1.052010 |
| H | -0.737676 | -0.099483 | -3.768846 |
| H | 1.030529  | -0.265001 | -3.929956 |
| H | 0.336119  | 1.271533  | -3.343387 |
| H | 1.280199  | -0.085451 | -1.602214 |
| H | -1.701444 | -0.019729 | -1.408414 |

|   |           |           |           |
|---|-----------|-----------|-----------|
| H | -0.624247 | 1.368515  | -1.077803 |
| H | -0.553701 | -0.091321 | -0.045200 |
| C | 6.212005  | -1.085997 | -1.068840 |
| N | 4.851732  | -1.613511 | -1.333146 |
| C | 4.757964  | -2.504289 | -2.515981 |
| H | 6.874324  | -1.910113 | -0.800879 |
| H | 6.141568  | -0.358635 | -0.264250 |
| H | 6.586977  | -0.585696 | -1.962236 |
| H | 4.179255  | -0.813541 | -1.437237 |
| H | 5.488676  | -3.308282 | -2.419070 |
| H | 4.959586  | -1.931224 | -3.421536 |
| H | 3.755937  | -2.927752 | -2.531965 |
| C | 5.572638  | 1.690201  | 3.351203  |
| N | 4.317260  | 1.931581  | 2.602876  |
| C | 3.697319  | 3.260382  | 2.834148  |
| H | 6.327285  | 2.412752  | 3.039857  |
| H | 5.916255  | 0.679923  | 3.134530  |
| H | 5.388576  | 1.785164  | 4.421608  |
| H | 3.641323  | 1.170111  | 2.830502  |
| H | 4.402932  | 4.040481  | 2.547682  |
| H | 3.437115  | 3.365448  | 3.888043  |
| H | 2.808354  | 3.322144  | 2.209803  |

#### 1SA4MA4DMA

|   |           |           |           |
|---|-----------|-----------|-----------|
| S | -2.510239 | -1.878568 | -1.582075 |
| O | -1.807174 | -1.875431 | -0.248672 |
| O | -2.125038 | -3.069418 | -2.358784 |
| O | -3.985918 | -1.829788 | -1.356579 |
| O | -2.112481 | -0.622218 | -2.327452 |
| H | -4.325950 | -2.132900 | 0.221605  |
| H | 0.571793  | 1.183465  | -2.322481 |
| O | 3.749638  | -4.785245 | -2.496826 |
| O | 3.025833  | -4.663835 | 1.018871  |
| O | -0.429142 | -4.867494 | -1.635361 |
| O | 3.897197  | -3.107204 | -0.351576 |
| O | 1.257668  | -3.502254 | -2.232937 |
| C | 3.234663  | -5.245204 | -1.278001 |
| C | 1.764116  | -5.694638 | -1.379613 |
| C | 3.421772  | -4.217066 | -0.158875 |
| C | 0.835134  | -4.566059 | -1.794752 |
| H | 3.833747  | -6.114032 | -0.987712 |
| H | 1.410061  | -6.119937 | -0.439313 |
| H | 1.695778  | -6.479265 | -2.138869 |
| H | 3.214153  | -4.011878 | -2.728005 |
| H | 3.159195  | -3.966658 | 1.718825  |

|   |           |           |           |
|---|-----------|-----------|-----------|
| H | -1.042686 | -4.112208 | -1.918795 |
| O | -3.393450 | 2.890057  | 2.277899  |
| O | -1.309972 | 0.413207  | 0.768503  |
| O | -3.548730 | 2.482707  | -0.500729 |
| O | -3.156801 | 0.196385  | 2.021225  |
| O | -1.816167 | 3.138891  | -1.739956 |
| C | -2.147746 | 2.383547  | 1.852936  |
| C | -1.578807 | 3.167638  | 0.660373  |
| C | -2.256931 | 0.879692  | 1.550395  |
| C | -2.371241 | 2.918339  | -0.625456 |
| H | -1.465188 | 2.484797  | 2.703900  |
| H | -0.529856 | 2.922390  | 0.491856  |
| H | -1.629733 | 4.233478  | 0.902939  |
| H | -3.956683 | 2.826840  | 1.489536  |
| H | -1.520771 | -0.534784 | 0.429634  |
| H | -4.007201 | 1.749871  | -1.927693 |
| O | 3.643630  | 4.368727  | -2.960560 |
| O | 0.217699  | 4.568506  | -2.014796 |
| O | 2.577856  | 4.115522  | 1.128562  |
| O | 1.503707  | 2.742513  | -2.329483 |
| O | 4.224835  | 3.495664  | -0.265770 |
| C | 2.541568  | 4.916523  | -2.292748 |
| C | 2.882409  | 5.393956  | -0.853416 |
| C | 1.347828  | 3.953311  | -2.230389 |
| C | 3.296230  | 4.245958  | 0.034778  |
| H | 2.226784  | 5.793282  | -2.861704 |
| H | 2.033503  | 5.915541  | -0.414034 |
| H | 3.731384  | 6.077772  | -0.930618 |
| H | 3.983470  | 3.644909  | -2.417712 |
| H | -0.595739 | 3.922615  | -1.885882 |
| H | 2.894939  | 3.330573  | 1.664370  |
| O | 6.336353  | -0.029038 | 3.088358  |
| O | 5.340025  | 1.720687  | 1.374360  |
| O | 4.234749  | -1.223064 | 1.427789  |
| O | 3.459029  | 2.056070  | 2.561831  |
| O | 3.399353  | -2.743053 | 2.857420  |
| C | 5.071848  | 0.495224  | 3.410384  |
| C | 4.028912  | -0.597137 | 3.714737  |
| C | 4.539703  | 1.502693  | 2.389912  |
| C | 3.858333  | -1.635098 | 2.628100  |
| H | 5.204595  | 1.073489  | 4.330639  |
| H | 3.052084  | -0.136226 | 3.890926  |
| H | 4.308421  | -1.129719 | 4.624283  |
| H | 6.326357  | -0.261338 | 2.152185  |

|     |           |           |           |
|-----|-----------|-----------|-----------|
| H   | 4.924988  | 2.372320  | 0.739534  |
| H   | 4.105572  | -1.953007 | 0.744345  |
| C   | 0.958914  | -0.380359 | -3.624453 |
| N   | 0.511149  | 0.151229  | -2.307382 |
| C   | 1.337096  | -0.335079 | -1.164876 |
| H   | 1.973555  | -0.035093 | -3.819814 |
| H   | 0.285933  | -0.008122 | -4.395206 |
| H   | 0.921686  | -1.467526 | -3.586630 |
| H   | -0.494151 | -0.125325 | -2.183088 |
| H   | 2.358898  | 0.017088  | -1.301168 |
| H   | 1.308809  | -1.421898 | -1.153651 |
| H   | 0.922462  | 0.071477  | -0.245238 |
| C   | -5.469019 | 0.551158  | -2.853590 |
| N   | -4.120123 | 1.165440  | -2.804892 |
| C   | -3.787188 | 1.999361  | -3.986241 |
| H   | -6.225448 | 1.336317  | -2.821009 |
| H   | -5.564935 | -0.125468 | -2.008789 |
| H   | -5.571425 | -0.024036 | -3.774093 |
| H   | -3.393314 | 0.413468  | -2.689463 |
| H   | -4.568055 | 2.747089  | -4.131101 |
| H   | -3.716541 | 1.365072  | -4.870315 |
| H   | -2.843110 | 2.499759  | -3.782897 |
| C   | -5.869825 | -1.891727 | 1.631478  |
| N   | -4.447197 | -2.129917 | 1.271557  |
| C   | -3.852987 | -3.361464 | 1.848528  |
| H   | -6.447377 | -2.796212 | 1.439449  |
| H   | -6.246506 | -1.081274 | 1.007934  |
| H   | -5.929306 | -1.586620 | 2.678110  |
| H   | -3.884560 | -1.309755 | 1.576542  |
| H   | -4.403818 | -4.229620 | 1.486340  |
| H   | -3.906833 | -3.316431 | 2.936407  |
| H   | -2.818176 | -3.416805 | 1.515915  |
| C   | -6.320457 | 1.170687  | 4.555445  |
| N   | -5.257139 | 0.214179  | 4.264151  |
| C   | -4.487574 | -0.141220 | 5.452064  |
| H   | -7.064463 | 0.711248  | 5.214731  |
| H   | -6.825574 | 1.454352  | 3.628789  |
| H   | -5.963331 | 2.092922  | 5.043674  |
| H   | -4.624520 | 0.613999  | 3.574617  |
| H   | -5.116923 | -0.701674 | 6.151498  |
| H   | -4.082391 | 0.730166  | 5.994934  |
| H   | -3.648712 | -0.781304 | 5.167907  |
| 2MA |           |           |           |
| O   | 3.747551  | -0.488791 | 1.148980  |

|         |           |           |           |
|---------|-----------|-----------|-----------|
| O       | 1.373613  | -1.601902 | -1.299066 |
| O       | 1.657069  | 1.590429  | 0.829709  |
| O       | 1.300464  | -1.626084 | 0.952103  |
| O       | 0.984697  | 1.897881  | -1.293217 |
| C       | 3.208487  | -0.630678 | -0.133310 |
| C       | 3.047362  | 0.725727  | -0.888940 |
| C       | 1.866966  | -1.366474 | -0.095357 |
| C       | 1.801336  | 1.481707  | -0.490027 |
| H       | 3.912146  | -1.236816 | -0.709913 |
| H       | 2.999690  | 0.567605  | -1.964778 |
| H       | 3.932122  | 1.320328  | -0.648657 |
| H       | 3.044548  | -0.161194 | 1.724609  |
| H       | 0.414053  | -1.838768 | -1.222454 |
| H       | 0.744925  | 1.918546  | 1.037328  |
| O       | -3.747461 | -0.489304 | -1.149087 |
| O       | -1.373322 | -1.602168 | 1.298903  |
| O       | -1.657562 | 1.591021  | -0.829478 |
| O       | -1.299880 | -1.625199 | -0.952277 |
| O       | -0.984989 | 1.897303  | 1.293547  |
| C       | -3.208376 | -0.631085 | 0.133254  |
| C       | -3.047652 | 0.725377  | 0.888889  |
| C       | -1.866617 | -1.366392 | 0.095253  |
| C       | -1.801705 | 1.481558  | 0.490198  |
| H       | -3.911840 | -1.237451 | 0.709855  |
| H       | -3.000114 | 0.567258  | 1.964739  |
| H       | -3.932530 | 1.319699  | 0.648393  |
| H       | -3.044013 | -0.163373 | -1.725126 |
| H       | -0.413777 | -1.838996 | 1.222220  |
| H       | -0.745448 | 1.919244  | -1.036930 |
| 2MA1DMA |           |           |           |
| O       | 3.952678  | 1.154054  | -0.636276 |
| O       | 1.343012  | 0.224127  | 1.618030  |
| O       | 1.738340  | -0.934680 | -1.288682 |
| O       | 1.535736  | 1.910183  | 0.127896  |
| O       | 1.945669  | -2.828461 | -0.098655 |
| C       | 3.415573  | 0.471060  | 0.470546  |
| C       | 3.520631  | -1.059474 | 0.284429  |
| C       | 1.981033  | 0.938872  | 0.729242  |
| C       | 2.332579  | -1.709290 | -0.389911 |
| H       | 3.989448  | 0.727386  | 1.373275  |
| H       | 3.646045  | -1.565471 | 1.241056  |
| H       | 4.416796  | -1.244173 | -0.314288 |
| H       | 3.272482  | 1.780803  | -0.920017 |
| H       | 0.355918  | 0.460790  | 1.683809  |

|         |           |           |           |
|---------|-----------|-----------|-----------|
| H       | 0.843719  | -1.309780 | -1.511710 |
| O       | -3.603056 | -1.511078 | -0.947436 |
| O       | -0.706094 | -3.226811 | 0.180497  |
| O       | -2.692932 | 0.884111  | 0.014205  |
| O       | -0.827665 | -1.601735 | -1.374514 |
| O       | -1.161271 | 0.751479  | 1.625161  |
| C       | -2.753858 | -2.035363 | 0.032573  |
| C       | -2.649894 | -1.128392 | 1.291422  |
| C       | -1.335257 | -2.272377 | -0.488692 |
| C       | -2.116405 | 0.267376  | 0.964510  |
| H       | -3.152377 | -3.005000 | 0.340846  |
| H       | -2.023170 | -1.595398 | 2.051288  |
| H       | -3.662458 | -1.017745 | 1.690020  |
| H       | -3.430991 | -0.553358 | -0.968159 |
| H       | 0.258481  | -3.229075 | -0.048768 |
| H       | -1.773060 | 2.081567  | -0.296188 |
| C       | -1.021808 | 3.306144  | -1.854862 |
| N       | -1.054272 | 2.883074  | -0.436191 |
| C       | -1.373780 | 3.957409  | 0.533809  |
| H       | -1.998440 | 3.699260  | -2.137985 |
| H       | -0.789914 | 2.437925  | -2.470599 |
| H       | -0.259738 | 4.072582  | -2.000885 |
| H       | -0.140182 | 2.470591  | -0.173566 |
| H       | -2.357843 | 4.368047  | 0.307057  |
| H       | -0.621297 | 4.745107  | 0.482096  |
| H       | -1.381733 | 3.509127  | 1.525850  |
| 2MA2DMA |           |           |           |
| O       | -3.801243 | 0.236553  | 1.913434  |
| O       | -2.487317 | 0.519617  | -1.394555 |
| O       | -1.455932 | -1.668613 | 1.785805  |
| O       | -1.854956 | 1.384795  | 0.591708  |
| O       | -1.286671 | -2.602194 | -0.247220 |
| C       | -3.681674 | -0.138180 | 0.564436  |
| C       | -3.397313 | -1.663499 | 0.410043  |
| C       | -2.582485 | 0.678047  | -0.151470 |
| C       | -1.951423 | -2.034489 | 0.617566  |
| H       | -4.632235 | 0.054005  | 0.056022  |
| H       | -3.677764 | -2.000249 | -0.586413 |
| H       | -4.010649 | -2.175352 | 1.156098  |
| H       | -2.990453 | 0.737055  | 2.092509  |
| H       | -1.161010 | 0.615646  | -2.185974 |
| H       | -0.469647 | -1.799580 | 1.789373  |
| O       | 3.926117  | -1.114117 | 1.577119  |
| O       | 1.360570  | -2.655325 | -0.403524 |



|         |           |           |           |
|---------|-----------|-----------|-----------|
| O       | 2.684962  | 1.193365  | 0.757625  |
| O       | 1.227317  | -1.690245 | 1.623576  |
| O       | 1.773369  | 1.203602  | -1.277581 |
| C       | 3.322396  | -1.570590 | 0.401980  |
| C       | 3.378848  | -0.522380 | -0.741687 |
| C       | 1.864512  | -1.984846 | 0.626605  |
| C       | 2.549851  | 0.723482  | -0.412986 |
| H       | 3.860938  | -2.465918 | 0.077653  |
| H       | 3.043402  | -0.956925 | -1.683122 |
| H       | 4.425807  | -0.223985 | -0.848398 |
| H       | 3.568571  | -0.219338 | 1.716562  |
| H       | 0.377215  | -2.771809 | -0.275071 |
| H       | 1.372023  | 2.037954  | 1.038717  |
| C       | -0.316868 | -0.902107 | -3.330739 |
| N       | -0.304210 | 0.493387  | -2.828163 |
| C       | -0.342079 | 1.522768  | -3.890560 |
| H       | -1.215214 | -1.059742 | -3.927523 |
| H       | -0.335353 | -1.577615 | -2.478048 |
| H       | 0.571020  | -1.087228 | -3.936827 |
| H       | 0.549289  | 0.655457  | -2.238219 |
| H       | -1.254464 | 1.408331  | -4.476333 |
| H       | 0.530381  | 1.422933  | -4.537438 |
| H       | -0.333472 | 2.506579  | -3.423605 |
| C       | 0.241531  | 2.702130  | 2.678727  |
| N       | 0.469288  | 2.586267  | 1.219560  |
| C       | 0.567035  | 3.877538  | 0.501261  |
| H       | 1.065872  | 3.250796  | 3.135370  |
| H       | 0.194410  | 1.698652  | 3.099177  |
| H       | -0.700445 | 3.218118  | 2.864422  |
| H       | -0.329401 | 2.044050  | 0.812162  |
| H       | 1.347978  | 4.489211  | 0.954231  |
| H       | -0.389521 | 4.398778  | 0.545551  |
| H       | 0.833469  | 3.655828  | -0.530821 |
| 2MA3DMA |           |           |           |
| O       | 0.289520  | 3.278138  | 1.204053  |
| O       | 2.979422  | 1.291584  | -0.057336 |
| O       | -1.358484 | 2.687558  | -1.008111 |
| O       | 1.072253  | 0.613497  | 0.915898  |
| O       | -0.136338 | 1.412260  | -2.398740 |
| C       | 1.329177  | 2.946434  | 0.298225  |
| C       | 0.938427  | 3.207688  | -1.183259 |
| C       | 1.849655  | 1.493073  | 0.415369  |
| C       | -0.222644 | 2.343668  | -1.613512 |
| H       | 2.175405  | 3.596802  | 0.528525  |

|   |           |           |           |
|---|-----------|-----------|-----------|
| H | 1.794754  | 2.988124  | -1.817352 |
| H | 0.654928  | 4.258160  | -1.289155 |
| H | -0.553462 | 3.153220  | 0.749742  |
| H | 3.027738  | -1.569779 | -0.219198 |
| H | -2.095830 | 2.036109  | -1.227477 |
| O | -4.974798 | -1.001253 | -0.505161 |
| O | -1.959261 | -0.618178 | -2.429866 |
| O | -2.884281 | -0.977747 | 1.282119  |
| O | -3.212510 | 0.897959  | -1.345231 |
| O | -1.131436 | -2.325432 | 0.916410  |
| C | -3.888811 | -1.431355 | -1.275339 |
| C | -3.035436 | -2.498106 | -0.547260 |
| C | -3.000895 | -0.253973 | -1.688718 |
| C | -2.271596 | -1.909733 | 0.649934  |
| H | -4.290583 | -1.866030 | -2.196744 |
| H | -2.330085 | -2.975449 | -1.227333 |
| H | -3.727522 | -3.262611 | -0.181740 |
| H | -4.573768 | -0.734925 | 0.341706  |
| H | -1.353430 | 0.155807  | -2.558976 |
| H | -1.848319 | -0.157611 | 2.070493  |
| C | 1.293026  | -1.877084 | -1.349739 |
| N | 2.005582  | -1.777307 | -0.048910 |
| C | 1.885501  | -2.996042 | 0.792190  |
| H | 1.727418  | -2.684590 | -1.940970 |
| H | 1.400175  | -0.928868 | -1.874905 |
| H | 0.242175  | -2.073333 | -1.149469 |
| H | 1.624645  | -0.927073 | 0.451321  |
| H | 2.352807  | -3.834904 | 0.273575  |
| H | 0.830389  | -3.192379 | 0.972515  |
| H | 2.406825  | -2.821690 | 1.733883  |
| C | -1.740351 | 1.684947  | 3.087706  |
| N | -1.106322 | 0.443779  | 2.587434  |
| C | -0.489060 | -0.398137 | 3.638037  |
| H | -2.434086 | 1.437065  | 3.891761  |
| H | -2.297099 | 2.142533  | 2.270580  |
| H | -0.978534 | 2.379960  | 3.437813  |
| H | -0.359342 | 0.674375  | 1.890419  |
| H | -1.227893 | -0.607576 | 4.412658  |
| H | 0.370477  | 0.114079  | 4.071534  |
| H | -0.186049 | -1.332193 | 3.168402  |
| C | 5.636045  | -1.248890 | 0.713261  |
| N | 4.736606  | -0.984795 | -0.410082 |
| C | 5.396906  | -1.115009 | -1.709314 |
| H | 5.942509  | -2.299676 | 0.712909  |

|         |           |           |           |
|---------|-----------|-----------|-----------|
| H       | 5.117380  | -1.043337 | 1.652339  |
| H       | 6.547907  | -0.632940 | 0.685916  |
| H       | 4.339561  | -0.046125 | -0.313549 |
| H       | 5.688876  | -2.155841 | -1.880809 |
| H       | 6.301763  | -0.493923 | -1.793076 |
| H       | 4.706843  | -0.819111 | -2.502203 |
| 2MA4DMA |           |           |           |
| O       | -1.980475 | -2.329557 | -1.640853 |
| O       | -0.868290 | 1.065688  | -2.092511 |
| O       | 0.857487  | -2.322418 | -1.517847 |
| O       | -1.526953 | -0.023436 | -0.239041 |
| O       | 1.928577  | -0.982248 | -2.965569 |
| C       | -1.598884 | -1.174339 | -2.367000 |
| C       | -0.411742 | -1.446252 | -3.323268 |
| C       | -1.307982 | 0.061192  | -1.471928 |
| C       | 0.910885  | -1.553961 | -2.605252 |
| H       | -2.460952 | -0.917138 | -2.987912 |
| H       | -0.321713 | -0.645040 | -4.052765 |
| H       | -0.603534 | -2.389415 | -3.844468 |
| H       | -1.209928 | -2.594986 | -1.122898 |
| H       | 0.019214  | 2.138407  | -1.293601 |
| H       | 1.724713  | -2.279116 | -1.016693 |
| O       | 4.594295  | -1.311943 | 2.108965  |
| O       | 3.916534  | -0.333936 | -1.273822 |
| O       | 2.156117  | -0.173720 | 2.552817  |
| O       | 2.989521  | -1.960607 | -0.029057 |
| O       | 1.622705  | 1.673490  | 1.420609  |
| C       | 4.539656  | -0.426310 | 1.029784  |
| C       | 3.927265  | 0.946200  | 1.419800  |
| C       | 3.743276  | -1.007084 | -0.141210 |
| C       | 2.451570  | 0.824285  | 1.825713  |
| H       | 5.561898  | -0.265063 | 0.675498  |
| H       | 4.033617  | 1.666531  | 0.608493  |
| H       | 4.493978  | 1.310889  | 2.281527  |
| H       | 3.708304  | -1.266675 | 2.513589  |
| H       | 3.286217  | -0.671927 | -1.964960 |
| H       | 0.591824  | -0.446307 | 2.355077  |
| C       | 1.895205  | 2.871519  | -1.815446 |
| N       | 0.744767  | 2.805701  | -0.882344 |
| C       | 0.111353  | 4.117886  | -0.594765 |
| H       | 1.554455  | 3.237736  | -2.783668 |
| H       | 2.310067  | 1.872298  | -1.934489 |
| H       | 2.657410  | 3.539464  | -1.412678 |
| H       | 1.076746  | 2.377563  | 0.014623  |

|   |           |           |           |
|---|-----------|-----------|-----------|
| H | -0.119659 | 4.616787  | -1.537051 |
| H | 0.799206  | 4.732292  | -0.012462 |
| H | -0.815926 | 3.935976  | -0.046018 |
| C | -0.742045 | -2.075074 | 2.429980  |
| N | -0.453163 | -0.630657 | 2.230889  |
| C | -1.178510 | 0.271150  | 3.156428  |
| H | -0.517144 | -2.345656 | 3.462246  |
| H | -0.092900 | -2.643675 | 1.764121  |
| H | -1.790826 | -2.267971 | 2.189303  |
| H | -0.716372 | -0.372015 | 1.258093  |
| H | -0.897273 | 0.032410  | 4.182427  |
| H | -2.252736 | 0.146029  | 3.025730  |
| H | -0.879480 | 1.292520  | 2.926439  |
| C | -4.510540 | -3.494376 | 0.772937  |
| N | -3.835260 | -2.211862 | 0.935132  |
| C | -4.766500 | -1.108237 | 1.134821  |
| H | -5.010595 | -3.774729 | 1.706172  |
| H | -3.777731 | -4.270188 | 0.539554  |
| H | -5.272163 | -3.494751 | -0.026076 |
| H | -3.269182 | -2.023192 | 0.110303  |
| H | -5.257192 | -1.198445 | 2.110318  |
| H | -5.561974 | -1.056206 | 0.370197  |
| H | -4.218091 | -0.164381 | 1.111649  |
| C | -3.667462 | 3.089240  | 1.502167  |
| N | -2.885436 | 2.845175  | 0.296975  |
| C | -3.661283 | 3.017814  | -0.927944 |
| H | -3.985843 | 4.136387  | 1.530436  |
| H | -3.052977 | 2.909338  | 2.387942  |
| H | -4.576138 | 2.466711  | 1.580398  |
| H | -2.492789 | 1.905507  | 0.306926  |
| H | -3.941676 | 4.070080  | -1.046114 |
| H | -4.591132 | 2.423545  | -0.948637 |
| H | -3.049793 | 2.725488  | -1.783572 |

#### 2SA1MA

|   |           |           |           |
|---|-----------|-----------|-----------|
| S | 1.356042  | 2.385495  | -0.045946 |
| O | 0.916060  | 1.340212  | -0.991749 |
| O | 2.446981  | 3.219544  | -0.393584 |
| O | 0.125524  | 3.292264  | 0.261586  |
| O | 1.633491  | 1.663547  | 1.325657  |
| H | -0.710724 | 2.747747  | 0.359884  |
| H | 1.529823  | 0.678281  | 1.252002  |
| S | 2.127408  | -1.810386 | 0.109715  |
| O | 1.294682  | -0.995591 | 1.018250  |
| O | 3.476280  | -2.060981 | 0.466161  |

O 1.408853 -3.166208 -0.121445  
O 2.030667 -1.126713 -1.312176  
H 0.420368 -3.033012 -0.279682  
H 1.689920 -0.200291 -1.237445  
O -4.139148 0.266640 1.021707  
O -1.678132 0.653481 -1.550317  
O -1.447473 -1.193956 1.158901  
O -2.035294 1.777796 0.371419  
O -1.132645 -2.691914 -0.489939  
C -3.558649 0.025602 -0.230650  
C -3.195178 -1.470323 -0.426574  
C -2.346204 0.924076 -0.444679  
C -1.827272 -1.862830 0.075419  
H -4.285603 0.281155 -1.012714  
H -3.236197 -1.754210 -1.477450  
H -3.950628 -2.048691 0.112203  
H -3.535054 0.830094 1.523228  
H -0.803021 1.104922 -1.543223  
H -0.489035 -1.331865 1.326021

2SA1MA1DMA

S 2.081058 -1.984589 -0.365460  
O 3.183627 -0.981191 0.135692  
O 2.680544 -3.259682 -0.535419  
O 0.932074 -1.846761 0.535105  
O 1.661912 -1.449380 -1.781381  
H -0.698340 -2.279127 0.146262  
H 1.273542 -0.524523 -1.744535  
S 1.487421 1.987465 -0.853238  
O 0.668202 1.020489 -1.658446  
O 2.573360 2.604925 -1.541079  
O 0.479776 3.135663 -0.425472  
O 1.882415 1.295934 0.420846  
H -0.431799 2.766881 -0.285181  
H 2.791102 -0.064386 0.255619  
O -3.874662 -1.599101 -1.435555  
O -2.007678 -0.900964 1.547506  
O -1.949632 0.644567 -1.703079  
O -1.617331 -2.233366 -0.222615  
O -1.936171 2.080259 0.025234  
C -3.674596 -1.013279 -0.180680  
C -3.774813 0.542299 -0.200615  
C -2.347337 -1.401345 0.483682  
C -2.475912 1.188136 -0.615271  
H -4.477271 -1.383011 0.462850

|   |           |           |           |
|---|-----------|-----------|-----------|
| H | -4.040493 | 0.932763  | 0.779630  |
| H | -4.560565 | 0.800899  | -0.914514 |
| H | -3.107574 | -1.397538 | -1.985790 |
| H | -0.471182 | -0.203584 | 2.145588  |
| H | -0.999482 | 0.929669  | -1.814607 |
| C | -0.398054 | 1.638217  | 3.092592  |
| N | 0.260563  | 0.445392  | 2.490589  |
| C | 1.180568  | -0.283526 | 3.407147  |
| H | -0.958370 | 1.330699  | 3.974800  |
| H | -1.073498 | 2.066991  | 2.354771  |
| H | 0.366473  | 2.364290  | 3.365871  |
| H | 0.803932  | 0.752024  | 1.652431  |
| H | 0.624049  | -0.618579 | 4.281870  |
| H | 1.984874  | 0.386061  | 3.709455  |
| H | 1.584385  | -1.137425 | 2.868710  |

#### 2SA1MA2DMA

|   |           |           |           |
|---|-----------|-----------|-----------|
| S | -1.450000 | 2.229799  | -0.278087 |
| O | -2.384888 | 1.481173  | 0.606158  |
| O | -1.940768 | 3.491175  | -0.753396 |
| O | -0.103286 | 2.241889  | 0.340247  |
| O | -1.319524 | 1.307205  | -1.608349 |
| H | 1.367630  | 2.293005  | -0.371234 |
| H | -0.862379 | 0.462577  | -1.380357 |
| S | -0.898039 | -2.157046 | -0.232280 |
| O | -0.206589 | -1.114539 | -1.046842 |
| O | -2.163516 | -2.578473 | -0.817758 |
| O | 0.045442  | -3.433605 | -0.301490 |
| O | -1.011857 | -1.746441 | 1.171790  |
| H | 0.967279  | -3.142717 | -0.076998 |
| H | -3.294742 | 0.332638  | -0.097096 |
| O | 4.401509  | 1.064412  | -1.951743 |
| O | 2.653179  | 1.058144  | 1.181454  |
| O | 2.344937  | -0.991964 | -1.627137 |
| O | 2.263576  | 2.093136  | -0.777392 |
| O | 2.503842  | -2.314016 | 0.185157  |
| C | 4.242604  | 0.756612  | -0.592520 |
| C | 4.293179  | -0.770469 | -0.303286 |
| C | 2.967564  | 1.341721  | 0.033286  |
| C | 2.969772  | -1.456345 | -0.549757 |
| H | 5.090148  | 1.214440  | -0.074444 |
| H | 4.580717  | -0.973079 | 0.726991  |
| H | 5.050299  | -1.197721 | -0.966590 |
| H | 3.573265  | 0.846892  | -2.396487 |
| H | 0.884148  | 0.842632  | 1.886784  |

|            |           |           |           |
|------------|-----------|-----------|-----------|
| H          | 1.375447  | -1.214072 | -1.577862 |
| C          | 1.238724  | -0.611342 | 3.309360  |
| N          | 0.318910  | 0.250881  | 2.519391  |
| C          | -0.584220 | 1.106003  | 3.336296  |
| H          | 1.890233  | 0.018734  | 3.912967  |
| H          | 1.835419  | -1.202389 | 2.618355  |
| H          | 0.646603  | -1.267985 | 3.945787  |
| H          | -0.250306 | -0.372668 | 1.909740  |
| H          | 0.016197  | 1.815271  | 3.905287  |
| H          | -1.150818 | 0.468688  | 4.015212  |
| H          | -1.256496 | 1.626017  | 2.659016  |
| C          | -4.907635 | -0.843249 | 0.482935  |
| N          | -3.918505 | -0.404562 | -0.533979 |
| C          | -4.505459 | 0.155547  | -1.780154 |
| H          | -5.497654 | 0.015160  | 0.802549  |
| H          | -4.363670 | -1.255759 | 1.331004  |
| H          | -5.557237 | -1.607626 | 0.056973  |
| H          | -3.304039 | -1.213229 | -0.759424 |
| H          | -5.114258 | 1.022975  | -1.527197 |
| H          | -5.115543 | -0.603100 | -2.270095 |
| H          | -3.688085 | 0.467407  | -2.427447 |
| 2SA1MA3DMA |           |           |           |
| S          | 1.163612  | 0.428736  | 2.198526  |
| O          | 2.333445  | 0.308396  | 1.280985  |
| O          | 1.499263  | 0.656382  | 3.574887  |
| O          | 0.156366  | 1.349912  | 1.619570  |
| O          | 0.479268  | -1.038580 | 2.170044  |
| H          | -1.485658 | 1.065865  | 1.934973  |
| H          | 0.219104  | -1.264554 | 1.244087  |
| S          | 0.448192  | -1.559335 | -1.624146 |
| O          | -0.091363 | -2.024720 | -0.302129 |
| O          | 1.804342  | -2.065481 | -1.843570 |
| O          | -0.429006 | -2.307388 | -2.722011 |
| O          | 0.287803  | -0.125306 | -1.800871 |
| H          | -1.373675 | -2.031260 | -2.593997 |
| H          | 2.843399  | -1.251440 | 0.926559  |
| O          | -4.685652 | -0.625278 | 1.891281  |
| O          | -2.665647 | 1.626381  | -0.043675 |
| O          | -2.697389 | -1.806891 | 0.129466  |
| O          | -2.422972 | 0.730045  | 2.005240  |
| O          | -2.925280 | -1.435676 | -2.079559 |
| C          | -4.428933 | 0.223520  | 0.802283  |
| C          | -4.543370 | -0.494243 | -0.566788 |
| C          | -3.076407 | 0.948259  | 0.884262  |

|            |           |           |           |
|------------|-----------|-----------|-----------|
| C          | -3.315268 | -1.297047 | -0.934222 |
| H          | -5.202576 | 0.996922  | 0.830602  |
| H          | -4.712826 | 0.214865  | -1.375975 |
| H          | -5.405448 | -1.165212 | -0.513055 |
| H          | -3.902149 | -1.174398 | 2.016681  |
| H          | -0.535657 | 1.869667  | -0.518091 |
| H          | -1.765725 | -2.080223 | -0.094718 |
| C          | -0.730364 | 2.738956  | -2.374131 |
| N          | -0.160437 | 2.691904  | -1.003644 |
| C          | -0.463681 | 3.889710  | -0.180597 |
| H          | -1.813844 | 2.814291  | -2.299640 |
| H          | -0.460068 | 1.817416  | -2.883280 |
| H          | -0.324761 | 3.604216  | -2.899726 |
| H          | 0.901191  | 2.557487  | -1.040589 |
| H          | -1.543381 | 4.003867  | -0.107192 |
| H          | -0.018940 | 4.767944  | -0.649829 |
| H          | -0.044532 | 3.731277  | 0.810604  |
| C          | 4.643227  | -2.055235 | 0.285625  |
| N          | 3.181636  | -2.160995 | 0.518114  |
| C          | 2.775552  | -3.298245 | 1.385840  |
| H          | 5.150731  | -1.904659 | 1.238097  |
| H          | 4.831027  | -1.204256 | -0.367113 |
| H          | 5.004264  | -2.967257 | -0.189397 |
| H          | 2.684927  | -2.228617 | -0.402431 |
| H          | 3.216267  | -3.172967 | 2.374291  |
| H          | 3.116315  | -4.230778 | 0.935810  |
| H          | 1.691893  | -3.294452 | 1.466139  |
| C          | 3.201331  | 1.714392  | -2.133679 |
| N          | 2.633038  | 2.332350  | -0.930661 |
| C          | 3.424659  | 3.466264  | -0.444544 |
| H          | 3.162206  | 2.420756  | -2.968615 |
| H          | 2.615188  | 0.833543  | -2.395593 |
| H          | 4.253754  | 1.419556  | -1.999158 |
| H          | 2.579870  | 1.630174  | -0.189206 |
| H          | 3.396765  | 4.282914  | -1.172513 |
| H          | 4.479572  | 3.205361  | -0.273515 |
| H          | 3.008322  | 3.828383  | 0.497502  |
| 2SA1MA4DMA |           |           |           |
| S          | 0.311510  | 1.076445  | 2.153389  |
| O          | 1.491791  | 1.145341  | 1.249630  |
| O          | 0.551829  | 1.563474  | 3.485562  |
| O          | -0.894180 | 1.622413  | 1.481679  |
| O          | 0.032023  | -0.503482 | 2.334444  |
| H          | -2.426752 | 0.928326  | 1.779258  |



|   |           |           |           |
|---|-----------|-----------|-----------|
| H | -0.106924 | -0.916354 | 1.441201  |
| S | 0.513893  | -1.582688 | -1.259958 |
| O | -0.284631 | -1.776986 | -0.001433 |
| O | 1.868300  | -2.093047 | -1.107736 |
| O | -0.176998 | -2.565935 | -2.318219 |
| O | 0.405223  | -0.221831 | -1.766702 |
| H | -1.144186 | -2.356847 | -2.346104 |
| H | 2.526792  | -0.254556 | 1.446057  |
| O | -5.138856 | -1.479405 | 1.650400  |
| O | -3.565895 | 1.107255  | -0.280480 |
| O | -2.823688 | -2.299893 | 0.130201  |
| O | -3.253617 | 0.371781  | 1.820682  |
| O | -2.848189 | -1.931051 | -2.089622 |
| C | -4.999021 | -0.645979 | 0.529703  |
| C | -4.821387 | -1.433595 | -0.796462 |
| C | -3.866553 | 0.384895  | 0.656346  |
| C | -3.404217 | -1.921427 | -1.005110 |
| H | -5.932169 | -0.080077 | 0.452690  |
| H | -5.085511 | -0.825859 | -1.660460 |
| H | -5.496859 | -2.292752 | -0.756506 |
| H | -4.270307 | -1.860705 | 1.829446  |
| H | -1.442383 | 1.754235  | -0.576144 |
| H | -1.827044 | -2.300322 | 0.029979  |
| C | -1.677433 | 2.059547  | -2.610059 |
| N | -1.246710 | 2.496589  | -1.257467 |
| C | -1.914429 | 3.729889  | -0.771057 |
| H | -2.748383 | 1.868632  | -2.591280 |
| H | -1.139377 | 1.146161  | -2.853133 |
| H | -1.442202 | 2.845651  | -3.328694 |
| H | -0.186966 | 2.645880  | -1.234973 |
| H | -2.990266 | 3.568525  | -0.759565 |
| H | -1.658011 | 4.560071  | -1.430026 |
| H | -1.565121 | 3.925182  | 0.240932  |
| C | 4.069396  | -0.264789 | 2.788746  |
| N | 3.294536  | -0.916023 | 1.702274  |
| C | 2.725436  | -2.242612 | 2.071088  |
| H | 3.411080  | -0.082495 | 3.637410  |
| H | 4.450097  | 0.688692  | 2.425724  |
| H | 4.897407  | -0.909353 | 3.084726  |
| H | 3.893743  | -1.030584 | 0.829646  |
| H | 2.017710  | -2.111320 | 2.887119  |
| H | 3.538950  | -2.904942 | 2.370057  |
| H | 2.214508  | -2.640592 | 1.196814  |
| C | 2.186209  | 2.514188  | -2.456108 |

|   |          |           |           |
|---|----------|-----------|-----------|
| N | 1.534728 | 2.888467  | -1.198424 |
| C | 2.014330 | 4.160270  | -0.653425 |
| H | 1.897434 | 3.212815  | -3.248088 |
| H | 1.866415 | 1.510059  | -2.735156 |
| H | 3.284738 | 2.533575  | -2.386387 |
| H | 1.669148 | 2.157621  | -0.497488 |
| H | 1.734222 | 4.982992  | -1.318639 |
| H | 3.107928 | 4.185596  | -0.532893 |
| H | 1.560480 | 4.333084  | 0.323810  |
| C | 5.259920 | 0.028668  | -1.269151 |
| N | 4.657616 | -1.213420 | -0.777390 |
| C | 5.498978 | -2.386665 | -1.036964 |
| H | 6.185037 | 0.234729  | -0.722337 |
| H | 4.572671 | 0.860768  | -1.104716 |
| H | 5.504192 | -0.011022 | -2.340632 |
| H | 3.751519 | -1.361982 | -1.225488 |
| H | 6.403241 | -2.344159 | -0.422364 |
| H | 5.808240 | -2.458739 | -2.089713 |
| H | 4.947019 | -3.292727 | -0.784460 |

#### 2SA2MA

|   |           |           |           |
|---|-----------|-----------|-----------|
| S | 0.270845  | 2.993613  | 0.231074  |
| O | 1.543380  | 3.458362  | 0.728778  |
| O | -0.908427 | 3.792129  | 0.446418  |
| O | 0.368057  | 2.756096  | -1.315253 |
| O | 0.070780  | 1.564258  | 0.836628  |
| H | 1.228103  | 2.275737  | -1.517093 |
| H | -0.875085 | 1.251826  | 0.671941  |
| O | -4.792602 | 0.307688  | -1.770682 |
| O | -3.723799 | -1.937816 | 0.808610  |
| O | -3.495368 | 2.808293  | 0.711477  |
| O | -2.999146 | -1.571788 | -1.297099 |
| O | -2.394787 | 0.866963  | 0.440844  |
| C | -4.849028 | -0.289045 | -0.498991 |
| C | -4.774313 | 0.804357  | 0.579974  |
| C | -3.744314 | -1.331724 | -0.355101 |
| C | -3.436108 | 1.503803  | 0.563265  |
| H | -5.800752 | -0.822749 | -0.369044 |
| H | -4.904744 | 0.361437  | 1.572079  |
| H | -5.573900 | 1.525007  | 0.413239  |
| H | -4.098850 | -0.151689 | -2.265548 |
| H | -2.964753 | -2.568960 | 0.862309  |
| H | -2.592356 | 3.204221  | 0.664257  |
| S | -0.255663 | -2.961865 | 0.273061  |
| O | 0.929322  | -3.779565 | 0.193836  |

O -1.469290 -3.511091 0.826557  
O 0.052212 -1.668606 1.096756  
O -0.531447 -2.458304 -1.185372  
H 1.015581 -1.389617 0.981610  
H -1.479584 -2.135673 -1.267376  
O 5.263355 -0.280960 1.151847  
O 3.407491 -2.734269 -0.385026  
O 3.760821 1.951878 0.203961  
O 2.550053 -0.990319 0.759848  
O 2.617559 1.428433 -1.666421  
C 4.796224 -0.814888 -0.059420  
C 4.652073 0.247968 -1.182466  
C 3.461864 -1.534876 0.151199  
C 3.567540 1.267189 -0.917319  
H 5.532976 -1.549473 -0.384533  
H 4.434944 -0.229530 -2.138180  
H 5.612960 0.764665 -1.249430  
H 4.671201 0.438129 1.409966  
H 2.528577 -3.156465 -0.219316  
H 2.993825 2.547423 0.396458

2SA2MA1DMA

S -0.045410 -2.266581 -0.568393  
O -0.113704 -1.434666 -1.773413  
O -0.518412 -1.559120 0.636856  
O -1.030159 -3.502401 -0.787205  
O 1.266610 -2.897425 -0.353795  
H -1.560189 -0.737723 -2.126773  
H 2.625912 -2.109752 -0.768435  
O 4.255412 0.619457 -2.758505  
O 3.382196 2.672331 0.017187  
O 3.574185 -0.983133 1.135546  
O 2.076131 1.436277 -1.344590  
O 3.426511 -1.563292 -1.037617  
C 4.453528 1.154248 -1.483462  
C 4.991943 0.114116 -0.456018  
C 3.172947 1.787447 -0.939019  
C 3.932616 -0.879081 -0.029465  
H 5.205236 1.940306 -1.579447  
H 5.361647 0.614848 0.437704  
H 5.812199 -0.412468 -0.949156  
H 3.552790 -0.042314 -2.698669  
H 2.525178 2.973981 0.404471  
H 2.180320 -1.552551 2.005446  
S -0.345238 2.759368 0.731359

O -1.534685 3.562592 0.862558  
O 0.932827 3.312509 1.111353  
O -0.505660 1.443569 1.572928  
O -0.309237 2.284279 -0.754958  
H -1.425928 1.055699 1.417571  
H 0.595917 1.905704 -0.993804  
O -5.231284 -0.894185 0.711116  
O -3.924361 2.349286 0.094622  
O -3.325711 -2.047939 -1.181582  
O -2.937019 0.589728 1.106781  
O -2.436625 -0.261475 -2.232792  
C -4.998704 0.231805 -0.085024  
C -4.705732 -0.132260 -1.570556  
C -3.843998 1.080446 0.454463  
C -3.418247 -0.922312 -1.664265  
H -5.903953 0.841330 -0.059175  
H -4.640952 0.769680 -2.178146  
H -5.531852 -0.756829 -1.913908  
H -4.511901 -1.522798 0.555315  
H -3.122794 2.846334 0.381725  
H -1.923323 -3.112904 -0.962276  
C 1.416931 -3.193949 3.010942  
N 1.333295 -1.779553 2.563817  
C 1.175738 -0.780494 3.651786  
H 2.275530 -3.318313 3.671011  
H 1.526482 -3.817379 2.125487  
H 0.500825 -3.458681 3.538195  
H 0.538211 -1.687961 1.876144  
H 2.051072 -0.807109 4.300646  
H 0.280135 -1.015105 4.226825  
H 1.068501 0.205361 3.202851

2SA2MA2DMA

S -0.502404 1.310386 -1.775503  
O -0.976210 0.603969 -0.407241  
O 0.125701 2.575844 -1.377816  
O 0.423154 0.377460 -2.432859  
O -1.776793 1.493368 -2.477275  
H 1.190293 -2.042311 -1.462947  
H -3.085998 0.734277 -1.861695  
O -4.547776 -2.522708 -0.867803  
O -2.825523 -1.363523 2.061213  
O -3.910372 1.633262 0.212053  
O -2.034368 -2.396601 0.220512  
O -3.785456 0.134843 -1.464286

|   |           |           |           |
|---|-----------|-----------|-----------|
| C | -4.407115 | -1.921460 | 0.392030  |
| C | -5.011400 | -0.493556 | 0.459040  |
| C | -2.945663 | -1.929674 | 0.873326  |
| C | -4.183831 | 0.545526  | -0.267189 |
| H | -4.969795 | -2.542720 | 1.094797  |
| H | -5.118922 | -0.166498 | 1.491209  |
| H | -6.001277 | -0.541433 | -0.004406 |
| H | -4.111081 | -1.941100 | -1.503737 |
| H | -1.877073 | -1.299897 | 2.360348  |
| H | -2.475759 | 2.669533  | 0.302465  |
| S | 0.855313  | -0.638738 | 2.363246  |
| O | 2.041687  | -1.299179 | 2.907297  |
| O | -0.389927 | -0.946350 | 3.047483  |
| O | 1.047075  | 0.944408  | 2.591116  |
| O | 0.778243  | -0.802351 | 0.887973  |
| H | 1.918166  | 1.180715  | 2.179272  |
| H | -0.223058 | 0.151729  | 0.080068  |
| O | 5.239420  | 1.868430  | -0.627409 |
| O | 4.278882  | -0.799513 | 1.564543  |
| O | 3.047214  | 0.601828  | -2.030614 |
| O | 3.387947  | 1.253441  | 1.260566  |
| O | 2.918281  | -1.628153 | -1.776195 |
| C | 5.223561  | 0.558902  | -0.136048 |
| C | 4.981618  | -0.513065 | -1.238101 |
| C | 4.200820  | 0.385617  | 0.991135  |
| C | 3.546408  | -0.583940 | -1.712974 |
| H | 6.214475  | 0.367933  | 0.284309  |
| H | 5.258157  | -1.502181 | -0.877632 |
| H | 5.621007  | -0.244492 | -2.083374 |
| H | 4.333922  | 2.093252  | -0.878435 |
| H | 3.491407  | -0.966307 | 2.158210  |
| H | 2.075681  | 0.534335  | -2.248945 |
| C | -2.362126 | 4.704633  | -0.001747 |
| N | -1.773446 | 3.420049  | 0.458162  |
| C | -1.346896 | 3.399159  | 1.885190  |
| H | -3.253994 | 4.923583  | 0.584326  |
| H | -2.625902 | 4.602875  | -1.053132 |
| H | -1.628895 | 5.501335  | 0.118814  |
| H | -0.963694 | 3.181589  | -0.160178 |
| H | -2.222000 | 3.536182  | 2.519540  |
| H | -0.632364 | 4.204263  | 2.054867  |
| H | -0.872856 | 2.442707  | 2.099089  |
| C | -0.421001 | -2.931072 | -2.435127 |
| N | 0.372701  | -2.629254 | -1.213787 |

C 0.868227 -3.823943 -0.478376  
H 0.168606 -3.568350 -3.093476  
H -0.640626 -1.987837 -2.931470  
H -1.342437 -3.426389 -2.135639  
H -0.210288 -2.094644 -0.557496  
H 1.520077 -4.399548 -1.133765  
H 0.013654 -4.419010 -0.161094  
H 1.424187 -3.474085 0.388588

2SA2MA3DMA

S -0.334985 0.685674 -2.150109  
O -0.832407 0.661564 -0.583972  
O 0.783602 1.609765 -2.197665  
O 0.044471 -0.716695 -2.436595  
O -1.535833 1.130849 -2.848781  
H 0.194651 -2.932756 -1.067274  
H -3.016127 1.031412 -2.063769  
O -5.364854 -1.388761 -0.620035  
O -3.351845 -0.457459 2.202882  
O -3.458347 2.483387 -0.198505  
O -2.912700 -1.879869 0.512230  
O -3.839703 0.745411 -1.581777  
C -5.026604 -0.686470 0.546416  
C -5.138713 0.852319 0.392794  
C -3.640248 -1.086580 1.075314  
C -4.056072 1.467165 -0.475918  
H -5.747771 -0.989921 1.311139  
H -5.099457 1.340796 1.364618  
H -6.110132 1.060270 -0.066134  
H -4.797701 -1.042082 -1.322329  
H -2.434540 -0.668518 2.523735  
H -0.538346 2.346941 0.038647  
S 0.358279 -0.832536 2.457742  
O 1.399502 -1.650730 3.085389  
O -0.891587 -0.765265 3.193064  
O 0.906317 0.690791 2.468321  
O 0.200661 -1.167429 1.022141  
H 1.794774 0.652282 2.035047  
H -0.356165 -0.027933 -0.043314  
O 4.900098 0.096930 -1.064131  
O 3.611848 -1.840616 1.668287  
O 2.621000 -1.092840 -2.205350  
O 3.170443 0.278066 1.046439  
O 2.021478 -3.076244 -1.332031  
C 4.727755 -1.039194 -0.263074

|            |           |           |           |
|------------|-----------|-----------|-----------|
| C          | 4.292185  | -2.302465 | -1.058208 |
| C          | 3.754759  | -0.786303 | 0.897147  |
| C          | 2.860204  | -2.219235 | -1.545922 |
| H          | 5.701076  | -1.257913 | 0.186002  |
| H          | 4.387916  | -3.194045 | -0.442504 |
| H          | 4.958130  | -2.383421 | -1.921509 |
| H          | 4.090422  | 0.208396  | -1.582712 |
| H          | 2.832304  | -1.741505 | 2.294375  |
| H          | 1.638556  | -0.977838 | -2.392549 |
| C          | -0.736869 | 4.253488  | -0.719593 |
| N          | -0.268837 | 3.302949  | 0.327428  |
| C          | -0.836132 | 3.558117  | 1.679173  |
| H          | -1.817501 | 4.164218  | -0.809675 |
| H          | -0.263869 | 3.977140  | -1.659782 |
| H          | -0.452990 | 5.266661  | -0.433306 |
| H          | 0.799068  | 3.301870  | 0.354678  |
| H          | -1.921282 | 3.490422  | 1.616876  |
| H          | -0.536677 | 4.552287  | 2.012190  |
| H          | -0.452697 | 2.800782  | 2.361382  |
| C          | -1.656700 | -3.462162 | -1.865297 |
| N          | -0.749796 | -3.174573 | -0.720229 |
| C          | -0.615725 | -4.280076 | 0.266319  |
| H          | -1.328888 | -4.377579 | -2.357258 |
| H          | -1.595050 | -2.622017 | -2.553898 |
| H          | -2.670517 | -3.563944 | -1.483955 |
| H          | -1.108453 | -2.357806 | -0.208423 |
| H          | -0.215204 | -5.159591 | -0.235785 |
| H          | -1.595892 | -4.490408 | 0.690439  |
| H          | 0.067107  | -3.950575 | 1.046262  |
| C          | 3.066768  | 3.807356  | -0.997621 |
| N          | 2.588687  | 3.232946  | 0.270394  |
| C          | 3.293157  | 3.784731  | 1.435449  |
| H          | 2.835056  | 4.876154  | -1.029108 |
| H          | 2.558422  | 3.311848  | -1.824849 |
| H          | 4.151911  | 3.690677  | -1.124112 |
| H          | 2.774209  | 2.231086  | 0.243290  |
| H          | 3.070611  | 4.851524  | 1.530755  |
| H          | 4.383519  | 3.670697  | 1.362759  |
| H          | 2.954742  | 3.281919  | 2.343627  |
| 2SA2MA4DMA |           |           |           |
| S          | 0.339076  | 0.833967  | -2.127707 |
| O          | -0.044803 | 1.096950  | -0.551971 |
| O          | 1.732655  | 1.219553  | -2.265445 |
| O          | 0.103036  | -0.611297 | -2.333691 |

|   |           |           |           |
|---|-----------|-----------|-----------|
| O | -0.609474 | 1.698443  | -2.824870 |
| H | -0.579169 | -2.476417 | -0.788572 |
| H | -1.919291 | 2.283852  | -1.992287 |
| O | -4.976497 | 1.197558  | -0.327219 |
| O | -2.564769 | 1.278875  | 2.329961  |
| O | -1.590307 | 3.892471  | -0.221587 |
| O | -2.957848 | -0.289349 | 0.757430  |
| O | -2.755381 | 2.412331  | -1.460915 |
| C | -4.301117 | 1.727849  | 0.789278  |
| C | -3.758832 | 3.156963  | 0.545718  |
| C | -3.194423 | 0.780983  | 1.282183  |
| C | -2.574687 | 3.212078  | -0.403971 |
| H | -5.038081 | 1.789099  | 1.595315  |
| H | -3.453976 | 3.616531  | 1.483918  |
| H | -4.575337 | 3.745757  | 0.116574  |
| H | -4.358306 | 1.256397  | -1.070875 |
| H | -1.824442 | 0.689790  | 2.647586  |
| H | 0.998129  | 2.525533  | -0.076400 |
| S | 0.575772  | -0.646857 | 2.530849  |
| O | 1.231634  | -1.795723 | 3.160873  |
| O | -0.503886 | -0.062562 | 3.309258  |
| O | 1.687149  | 0.528155  | 2.453565  |
| O | 0.219229  | -0.928213 | 1.121891  |
| H | 2.462030  | 0.123090  | 1.991098  |
| H | 0.111918  | 0.292955  | 0.018530  |
| O | 4.937873  | -1.721757 | -1.167129 |
| O | 3.124768  | -2.900506 | 1.697969  |
| O | 2.337522  | -1.984428 | -2.214743 |
| O | 3.519628  | -0.803933 | 0.980848  |
| O | 1.042429  | -3.478084 | -1.144219 |
| C | 4.376856  | -2.671583 | -0.302835 |
| C | 3.446032  | -3.691504 | -1.018507 |
| C | 3.634118  | -2.017107 | 0.870049  |
| C | 2.140371  | -3.064536 | -1.464380 |
| H | 5.209114  | -3.236300 | 0.127707  |
| H | 3.213140  | -4.523282 | -0.357450 |
| H | 3.986021  | -4.059948 | -1.894567 |
| H | 4.213624  | -1.338635 | -1.683099 |
| H | 2.473744  | -2.477874 | 2.336092  |
| H | 1.475206  | -1.491306 | -2.365282 |
| C | 1.579247  | 4.301780  | -0.948981 |
| N | 1.664745  | 3.286557  | 0.137335  |
| C | 1.348599  | 3.814828  | 1.491891  |
| H | 0.561252  | 4.683683  | -0.987956 |



|        |           |           |           |
|--------|-----------|-----------|-----------|
| H      | 1.825292  | 3.809234  | -1.887424 |
| H      | 2.287594  | 5.104609  | -0.741973 |
| H      | 2.633346  | 2.833992  | 0.122707  |
| H      | 0.338991  | 4.222808  | 1.477550  |
| H      | 2.067903  | 4.592381  | 1.750758  |
| H      | 1.408715  | 2.993011  | 2.204148  |
| C      | -2.459855 | -2.589535 | -1.659267 |
| N      | -1.560809 | -2.472363 | -0.474491 |
| C      | -1.723160 | -3.555928 | 0.531898  |
| H      | -2.267385 | -3.546912 | -2.143774 |
| H      | -2.210190 | -1.778489 | -2.340343 |
| H      | -3.498820 | -2.519564 | -1.326393 |
| H      | -1.735857 | -1.574099 | -0.002814 |
| H      | -1.490142 | -4.509257 | 0.060772  |
| H      | -2.749736 | -3.548826 | 0.893495  |
| H      | -1.028294 | -3.366097 | 1.346798  |
| C      | 4.816302  | 2.266565  | -1.330775 |
| N      | 4.223734  | 2.030309  | -0.004333 |
| C      | 5.165322  | 2.315460  | 1.086465  |
| H      | 5.051745  | 3.328819  | -1.446169 |
| H      | 4.095523  | 1.980827  | -2.096941 |
| H      | 5.742136  | 1.694274  | -1.480000 |
| H      | 3.977197  | 1.042600  | 0.051691  |
| H      | 5.404581  | 3.382864  | 1.099483  |
| H      | 6.107021  | 1.758043  | 0.987624  |
| H      | 4.710907  | 2.054258  | 2.044315  |
| C      | -6.741110 | -1.992334 | -1.436843 |
| N      | -5.647813 | -1.978420 | -0.470463 |
| C      | -6.033580 | -2.538494 | 0.819833  |
| H      | -7.009017 | -3.025748 | -1.680301 |
| H      | -6.422976 | -1.503759 | -2.360849 |
| H      | -7.654314 | -1.486182 | -1.079634 |
| H      | -5.335157 | -1.019660 | -0.334642 |
| H      | -6.236566 | -3.609926 | 0.717371  |
| H      | -6.935111 | -2.072863 | 1.255309  |
| H      | -5.213690 | -2.416377 | 1.531721  |
| 2SA3MA |           |           |           |
| S      | -1.696467 | 3.496500  | -1.033664 |
| O      | -2.873038 | 3.067560  | -1.750621 |
| O      | -1.068232 | 4.740936  | -1.401792 |
| O      | -2.024024 | 3.607805  | 0.493502  |
| O      | -0.662931 | 2.331541  | -1.141735 |
| H      | -2.677908 | 2.892495  | 0.767365  |
| H      | 0.256018  | 2.652328  | -0.862800 |

|   |           |           |           |
|---|-----------|-----------|-----------|
| O | 3.079685  | 3.628802  | 2.357735  |
| O | 4.838802  | 2.052464  | -0.336369 |
| O | 1.456814  | 5.431785  | -0.597968 |
| O | 3.554767  | 1.228075  | 1.321654  |
| O | 1.683307  | 3.198360  | -0.428001 |
| C | 3.957857  | 3.584142  | 1.260599  |
| C | 3.521459  | 4.600486  | 0.198838  |
| C | 4.082348  | 2.161442  | 0.726754  |
| C | 2.122215  | 4.336508  | -0.300462 |
| H | 4.973643  | 3.861849  | 1.579004  |
| H | 4.199046  | 4.562060  | -0.659631 |
| H | 3.565758  | 5.605769  | 0.617474  |
| H | 2.812485  | 2.715152  | 2.534106  |
| H | 4.948718  | 1.089344  | -0.593875 |
| H | 0.548479  | 5.218905  | -0.922517 |
| S | -1.281246 | -3.821010 | -0.432481 |
| O | -0.378781 | -4.325807 | -1.440309 |
| O | -2.621270 | -4.349289 | -0.372198 |
| O | -0.651893 | -4.038022 | 0.980802  |
| O | -1.333494 | -2.271961 | -0.621671 |
| H | 0.354761  | -3.990344 | 0.933989  |
| H | -2.198646 | -1.884901 | -0.269005 |
| O | -5.349162 | 0.066226  | 2.444494  |
| O | -4.857971 | 1.483423  | -0.807552 |
| O | -4.973217 | -3.042779 | 0.041539  |
| O | -3.795215 | 1.798700  | 1.158619  |
| O | -3.600922 | -1.262655 | 0.145988  |
| C | -5.709902 | 0.372940  | 1.120896  |
| C | -5.964920 | -0.920917 | 0.346204  |
| C | -4.668069 | 1.278068  | 0.473883  |
| C | -4.721528 | -1.759877 | 0.180975  |
| H | -6.644575 | 0.955421  | 1.105295  |
| H | -6.342311 | -0.695014 | -0.656007 |
| H | -6.726735 | -1.506201 | 0.861732  |
| H | -4.595378 | 0.629820  | 2.668586  |
| H | -4.155200 | 2.070816  | -1.183875 |
| H | -4.138121 | -3.551146 | -0.101126 |
| O | 4.617510  | -3.951796 | 1.349189  |
| O | 2.315870  | -4.171858 | -1.390416 |
| O | 3.705324  | -1.328909 | 0.572106  |
| O | 1.961467  | -3.952589 | 0.826972  |
| O | 5.157354  | -0.501600 | -0.929665 |
| C | 4.224092  | -3.988297 | 0.003986  |
| C | 4.862018  | -2.868435 | -0.842673 |

|   |          |           |           |
|---|----------|-----------|-----------|
| C | 2.704575 | -4.031446 | -0.139251 |
| C | 4.590530 | -1.447344 | -0.401532 |
| H | 4.584907 | -4.936708 | -0.408487 |
| H | 4.550174 | -2.950489 | -1.887355 |
| H | 5.946896 | -2.994646 | -0.827768 |
| H | 3.998860 | -3.373514 | 1.812858  |
| H | 1.328931 | -4.218355 | -1.453789 |
| H | 3.603558 | -0.371416 | 0.840406  |

2SA3MA1DMA

|   |           |           |           |
|---|-----------|-----------|-----------|
| S | 1.009071  | -2.277010 | 0.037645  |
| O | 0.362473  | -3.326481 | 0.789696  |
| O | 2.433448  | -2.341467 | -0.168069 |
| O | 0.385816  | -2.192360 | -1.403110 |
| O | 0.599892  | -0.940754 | 0.725653  |
| H | -0.609540 | -2.342434 | -1.360724 |
| H | 1.011064  | -0.132009 | 0.271079  |
| O | -4.691779 | -3.569343 | -1.969023 |
| O | -2.200000 | -4.140955 | 0.517474  |
| O | -5.183690 | -1.156703 | -0.579295 |
| O | -2.182559 | -2.728717 | -1.243441 |
| O | -4.897718 | -1.218299 | 1.648823  |
| C | -4.223601 | -3.891847 | -0.692028 |
| C | -5.075805 | -3.294916 | 0.459639  |
| C | -2.749024 | -3.524959 | -0.510366 |
| C | -5.036863 | -1.787322 | 0.577051  |
| H | -4.287778 | -4.978800 | -0.600589 |
| H | -4.769169 | -3.708684 | 1.419325  |
| H | -6.112942 | -3.585440 | 0.266842  |
| H | -4.636085 | -2.610350 | -2.070638 |
| H | -1.261052 | -3.854191 | 0.648689  |
| H | -5.177981 | -0.165250 | -0.442399 |
| S | 0.931331  | 2.059186  | -1.284189 |
| O | 1.690082  | 1.134502  | -0.370536 |
| O | 0.767704  | 3.381134  | -0.691904 |
| O | 1.528504  | 2.045219  | -2.615341 |
| O | -0.493381 | 1.401828  | -1.449735 |
| H | 2.834610  | 0.998731  | -2.792566 |
| H | -1.150224 | 1.811401  | -0.811102 |
| O | -4.946215 | 4.103930  | -0.327095 |
| O | -4.655541 | 1.407349  | 2.013703  |
| O | -1.242278 | 4.401942  | 0.755915  |
| O | -5.199707 | 1.469717  | -0.171924 |
| O | -2.245572 | 2.476072  | 0.173669  |
| C | -4.765632 | 3.537284  | 0.947807  |

|            |           |           |           |
|------------|-----------|-----------|-----------|
| C          | -3.442061 | 4.020407  | 1.552213  |
| C          | -4.872097 | 2.017626  | 0.875196  |
| C          | -2.249853 | 3.560141  | 0.747284  |
| H          | -5.574130 | 3.859294  | 1.620461  |
| H          | -3.327976 | 3.631518  | 2.568879  |
| H          | -3.444448 | 5.109035  | 1.606694  |
| H          | -5.138883 | 3.369985  | -0.928335 |
| H          | -4.750638 | 0.418192  | 1.903269  |
| H          | -0.478065 | 4.036540  | 0.234958  |
| O          | 7.034312  | -0.042500 | 1.234596  |
| O          | 3.777247  | 1.454167  | 1.278901  |
| O          | 4.718265  | -1.775216 | 1.370713  |
| O          | 5.068939  | 0.776500  | -0.438213 |
| O          | 3.520274  | -1.736680 | 3.279544  |
| C          | 5.939300  | 0.621716  | 1.811088  |
| C          | 5.318709  | -0.147347 | 2.998787  |
| C          | 4.883724  | 0.963251  | 0.752172  |
| C          | 4.412596  | -1.300395 | 2.606629  |
| H          | 6.325344  | 1.571709  | 2.194297  |
| H          | 4.725805  | 0.511613  | 3.632835  |
| H          | 6.142965  | -0.538385 | 3.602029  |
| H          | 6.678721  | -0.815358 | 0.778052  |
| H          | 3.049331  | 1.517760  | 0.607098  |
| H          | 3.983307  | -2.334872 | 1.055213  |
| C          | 3.538262  | -0.942201 | -3.156577 |
| N          | 3.751544  | 0.495189  | -2.835136 |
| C          | 4.638903  | 1.215644  | -3.785037 |
| H          | 3.039871  | -1.022169 | -4.122195 |
| H          | 2.922591  | -1.390588 | -2.379910 |
| H          | 4.504086  | -1.445842 | -3.191969 |
| H          | 4.155399  | 0.583390  | -1.878656 |
| H          | 4.220698  | 1.151786  | -4.789083 |
| H          | 5.631703  | 0.767735  | -3.762140 |
| H          | 4.698715  | 2.258974  | -3.479906 |
| 2SA3MA2DMA |           |           |           |
| S          | -1.597661 | -2.341691 | -0.302158 |
| O          | -0.673082 | -3.454229 | -0.545825 |
| O          | -2.828839 | -2.388220 | -1.079691 |
| O          | -1.862092 | -2.177890 | 1.156652  |
| O          | -0.764397 | -1.056624 | -0.740548 |
| H          | -0.332419 | -2.462355 | 2.014237  |
| H          | -1.010705 | -0.266245 | -0.182575 |
| O          | 5.085412  | -3.627027 | -0.481241 |
| O          | 1.718395  | -3.410986 | -1.656546 |

|   |           |           |           |
|---|-----------|-----------|-----------|
| O | 4.860965  | -0.846103 | -0.675340 |
| O | 2.556428  | -3.064131 | 0.411283  |
| O | 4.159191  | 0.037247  | -2.616668 |
| C | 4.069421  | -3.462222 | -1.432228 |
| C | 4.353310  | -2.345213 | -2.464063 |
| C | 2.691357  | -3.286445 | -0.782040 |
| C | 4.435456  | -0.932714 | -1.928510 |
| H | 4.018263  | -4.398771 | -1.993822 |
| H | 3.605570  | -2.350599 | -3.256879 |
| H | 5.325001  | -2.563069 | -2.919840 |
| H | 5.109214  | -2.822339 | 0.051735  |
| H | 0.813161  | -3.337069 | -1.239067 |
| H | 4.938664  | 0.111939  | -0.395367 |
| S | -0.809194 | 1.216072  | 2.120331  |
| O | -1.412673 | 1.041281  | 0.760755  |
| O | -0.687511 | 2.635545  | 2.455527  |
| O | -1.441668 | 0.377380  | 3.116686  |
| O | 0.678138  | 0.629886  | 1.989630  |
| H | -3.184375 | -1.065259 | 1.836520  |
| H | 1.252978  | 1.303350  | 1.526550  |
| O | 4.917349  | 3.974579  | 1.394454  |
| O | 4.015383  | 2.549699  | -1.765753 |
| O | 1.003883  | 4.341860  | 1.303843  |
| O | 5.059634  | 1.700195  | 0.041182  |
| O | 2.160828  | 2.475944  | 0.814461  |
| C | 4.425100  | 4.006036  | 0.076203  |
| C | 3.004802  | 4.581795  | 0.058662  |
| C | 4.510277  | 2.620751  | -0.555883 |
| C | 2.015863  | 3.693193  | 0.777432  |
| H | 5.056613  | 4.658607  | -0.544154 |
| H | 2.656990  | 4.694494  | -0.972980 |
| H | 3.008155  | 5.569572  | 0.519940  |
| H | 5.226412  | 3.070126  | 1.547955  |
| H | 4.083896  | 1.615745  | -2.118986 |
| H | 0.358245  | 3.710546  | 1.731093  |
| O | -6.202620 | 1.579965  | -2.085585 |
| O | -2.922799 | 2.437429  | -0.911652 |
| O | -4.064939 | -0.334597 | -2.389847 |
| O | -4.633470 | 1.409675  | 0.126733  |
| O | -2.646195 | 0.065783  | -4.097516 |
| C | -4.950170 | 2.217092  | -2.133437 |
| C | -4.125555 | 1.830951  | -3.378894 |
| C | -4.159212 | 1.978351  | -0.841307 |
| C | -3.514136 | 0.437661  | -3.357328 |

|            |           |           |           |
|------------|-----------|-----------|-----------|
| H          | -5.155608 | 3.291058  | -2.187531 |
| H          | -3.301516 | 2.527890  | -3.535345 |
| H          | -4.782945 | 1.900173  | -4.250046 |
| H          | -6.024091 | 0.643409  | -1.933531 |
| H          | -2.382711 | 2.102365  | -0.148421 |
| H          | -3.543999 | -1.156143 | -2.248985 |
| C          | -5.098269 | -1.585560 | 1.257428  |
| N          | -4.129183 | -0.640738 | 1.881674  |
| C          | -4.474372 | -0.246139 | 3.274513  |
| H          | -5.181733 | -2.472552 | 1.884717  |
| H          | -4.719654 | -1.865687 | 0.277108  |
| H          | -6.063805 | -1.089852 | 1.170013  |
| H          | -4.096145 | 0.212010  | 1.287809  |
| H          | -4.553085 | -1.143520 | 3.888115  |
| H          | -5.428431 | 0.279949  | 3.263301  |
| H          | -3.680930 | 0.392274  | 3.653533  |
| C          | 1.091386  | -2.211002 | 3.535668  |
| N          | 0.554605  | -2.906391 | 2.333776  |
| C          | 0.287725  | -4.358343 | 2.523834  |
| H          | 0.377858  | -2.311880 | 4.352730  |
| H          | 1.221265  | -1.159183 | 3.292912  |
| H          | 2.043098  | -2.665708 | 3.809504  |
| H          | 1.229299  | -2.818467 | 1.545895  |
| H          | -0.432890 | -4.486780 | 3.330879  |
| H          | 1.221078  | -4.862988 | 2.770576  |
| H          | -0.119436 | -4.747657 | 1.593211  |
| 2SA3MA3DMA |           |           |           |
| S          | -1.895020 | -1.880462 | 1.527901  |
| O          | -1.016113 | -2.953338 | 1.989270  |
| O          | -2.978298 | -2.296769 | 0.640975  |
| O          | -2.369705 | -1.021814 | 2.629435  |
| O          | -0.878628 | -0.958044 | 0.666113  |
| H          | 0.572941  | -0.021250 | 2.370333  |
| H          | -1.277211 | -0.061831 | 0.509655  |
| O          | 4.529782  | -4.047615 | 1.056231  |
| O          | 1.013439  | -3.902468 | 0.572630  |
| O          | 4.251350  | -1.357209 | 0.234710  |
| O          | 2.294417  | -2.818969 | 2.074495  |
| O          | 4.427893  | -1.255994 | -1.996100 |
| C          | 3.359771  | -4.024639 | 0.273801  |
| C          | 3.518234  | -3.250353 | -1.054289 |
| C          | 2.161330  | -3.515032 | 1.077104  |
| C          | 4.115477  | -1.870112 | -0.984005 |
| H          | 3.136247  | -5.060811 | 0.011259  |

|   |           |           |           |
|---|-----------|-----------|-----------|
| H | 2.550532  | -3.114019 | -1.565362 |
| H | 4.155156  | -3.824398 | -1.731258 |
| H | 4.582528  | -3.188460 | 1.493136  |
| H | 0.241450  | -3.544864 | 1.095666  |
| H | 4.624547  | -0.435219 | 0.177570  |
| S | -1.085677 | 2.530917  | 1.267825  |
| O | -1.822715 | 1.547147  | 0.414370  |
| O | -0.786486 | 3.754033  | 0.525684  |
| O | -1.680160 | 2.688411  | 2.572172  |
| O | 0.346277  | 1.812022  | 1.546105  |
| H | -3.637055 | 0.097683  | 2.252786  |
| H | 1.007571  | 2.092713  | 0.848985  |
| O | 5.027500  | 3.832174  | 0.441421  |
| O | 4.605885  | 1.358465  | -2.114359 |
| O | 1.398497  | 4.580180  | -0.752470 |
| O | 5.024707  | 1.200799  | 0.093673  |
| O | 2.196288  | 2.560619  | -0.172188 |
| C | 4.837331  | 3.380457  | -0.878063 |
| C | 3.579913  | 4.022043  | -1.476339 |
| C | 4.809765  | 1.856525  | -0.921851 |
| C | 2.322935  | 3.650151  | -0.724275 |
| H | 5.689677  | 3.679737  | -1.505256 |
| H | 3.454468  | 3.704214  | -2.516111 |
| H | 3.689724  | 5.106721  | -1.471666 |
| H | 5.155185  | 3.039782  | 0.982202  |
| H | 4.598016  | 0.351676  | -2.087703 |
| H | 0.573427  | 4.277432  | -0.281587 |
| O | -6.115700 | 0.039562  | -2.807223 |
| O | -3.016167 | 1.637013  | -1.959368 |
| O | -4.008690 | -1.629764 | -1.745638 |
| O | -4.839794 | 1.210359  | -0.711833 |
| O | -2.169001 | -1.905055 | -3.015087 |
| C | -4.858449 | 0.612674  | -3.058349 |
| C | -3.875412 | -0.362491 | -3.748528 |
| C | -4.249236 | 1.194826  | -1.776217 |
| C | -3.238873 | -1.384794 | -2.822710 |
| H | -5.033073 | 1.449167  | -3.741953 |
| H | -3.060816 | 0.173951  | -4.234305 |
| H | -4.434342 | -0.895257 | -4.523470 |
| H | -5.980793 | -0.624141 | -2.119143 |
| H | -2.586175 | 1.831224  | -1.085571 |
| H | -3.506474 | -2.108779 | -1.045388 |
| C | -5.601454 | -0.440090 | 1.927920  |
| N | -4.519731 | 0.582320  | 1.976153  |

|   |           |           |           |
|---|-----------|-----------|-----------|
| C | -4.785932 | 1.726167  | 2.890484  |
| H | -5.777057 | -0.817422 | 2.934765  |
| H | -5.268531 | -1.252586 | 1.285736  |
| H | -6.505543 | 0.015821  | 1.527521  |
| H | -4.381968 | 0.940098  | 1.013142  |
| H | -4.960023 | 1.341357  | 3.895168  |
| H | -5.667755 | 2.262552  | 2.540706  |
| H | -3.911860 | 2.374759  | 2.887013  |
| C | 2.449666  | 0.164487  | 3.188525  |
| N | 1.135154  | -0.526416 | 3.069532  |
| C | 0.371093  | -0.604972 | 4.348215  |
| H | 2.282119  | 1.184969  | 3.527347  |
| H | 2.928851  | 0.169718  | 2.212239  |
| H | 3.069685  | -0.382301 | 3.896951  |
| H | 1.311286  | -1.483263 | 2.698318  |
| H | 0.186035  | 0.407543  | 4.704793  |
| H | 0.962955  | -1.162581 | 5.073076  |
| H | -0.574178 | -1.104589 | 4.151638  |
| C | 0.943953  | -0.496833 | -2.529798 |
| N | 0.936729  | -1.936852 | -2.779114 |
| C | 1.205818  | -2.254272 | -4.179305 |
| H | 1.946698  | -0.097037 | -2.703503 |
| H | 0.675529  | -0.306932 | -1.488834 |
| H | 0.241450  | 0.060875  | -3.171239 |
| H | 0.012390  | -2.286485 | -2.544725 |
| H | 2.232419  | -1.968544 | -4.429196 |
| H | 0.527338  | -1.743027 | -4.882195 |
| H | 1.108522  | -3.331268 | -4.337219 |

#### 2SA3MA4DMA

|   |           |           |           |
|---|-----------|-----------|-----------|
| S | -0.799788 | -2.231354 | 1.089346  |
| O | 0.209174  | -2.915080 | 1.910288  |
| O | -0.873524 | -2.751467 | -0.278663 |
| O | -2.093248 | -2.087370 | 1.746408  |
| O | -0.164467 | -0.742712 | 0.981055  |
| H | 1.170886  | -0.272339 | 2.250498  |
| H | -0.830680 | -0.027573 | 0.779116  |
| O | 5.833945  | -3.309577 | 0.816461  |
| O | 2.336486  | -3.929176 | 0.701014  |
| O | 5.003159  | -0.787173 | -0.080904 |
| O | 3.477023  | -2.480070 | 1.994294  |
| O | 4.361746  | -0.700249 | -2.225244 |
| C | 4.616137  | -3.569797 | 0.163913  |
| C | 4.462373  | -2.852228 | -1.197493 |
| C | 3.415152  | -3.270520 | 1.063189  |



|   |           |           |           |
|---|-----------|-----------|-----------|
| C | 4.601699  | -1.350457 | -1.216629 |
| H | 4.594340  | -4.642073 | -0.041484 |
| H | 3.486475  | -3.073780 | -1.659674 |
| H | 5.230708  | -3.235291 | -1.876512 |
| H | 5.795845  | -2.393299 | 1.117517  |
| H | 1.529930  | -3.617510 | 1.202537  |
| H | 5.062526  | 0.202245  | -0.188663 |
| S | -1.065268 | 2.445893  | 1.717841  |
| O | -1.594871 | 1.468643  | 0.724825  |
| O | -1.007360 | 3.794900  | 1.122693  |
| O | -1.681130 | 2.347674  | 3.016131  |
| O | 0.476591  | 2.010811  | 1.958434  |
| H | -3.795812 | -1.502543 | 1.851766  |
| H | 1.031368  | 2.339038  | 1.198432  |
| O | 4.750609  | 4.503835  | 0.000127  |
| O | 4.051661  | 1.903215  | -2.360830 |
| O | 0.841203  | 4.758042  | -0.503748 |
| O | 5.016421  | 1.880036  | -0.324916 |
| O | 2.035814  | 2.926664  | 0.019272  |
| C | 4.344787  | 3.985420  | -1.243431 |
| C | 2.931650  | 4.472359  | -1.578567 |
| C | 4.480539  | 2.466306  | -1.261621 |
| C | 1.896063  | 3.977243  | -0.595820 |
| H | 5.013880  | 4.346600  | -2.038870 |
| H | 2.640387  | 4.124214  | -2.574518 |
| H | 2.917553  | 5.562706  | -1.593027 |
| H | 5.094725  | 3.754574  | 0.506896  |
| H | 4.191427  | 0.906846  | -2.331383 |
| H | 0.166183  | 4.385087  | 0.137462  |
| O | -5.727680 | -2.024245 | -0.752482 |
| O | -5.343821 | 1.286858  | -2.124174 |
| O | -3.145320 | -2.579744 | -1.673240 |
| O | -5.062921 | 0.553429  | -0.039447 |
| O | -2.448446 | -0.664100 | -2.636722 |
| C | -5.711768 | -1.031622 | -1.770883 |
| C | -4.746844 | -1.391982 | -2.930100 |
| C | -5.360163 | 0.382526  | -1.250676 |
| C | -3.316497 | -1.479914 | -2.435849 |
| H | -6.722029 | -0.974686 | -2.186444 |
| H | -4.809461 | -0.614564 | -3.686812 |
| H | -5.043919 | -2.356064 | -3.350087 |
| H | -4.881462 | -2.493251 | -0.793442 |
| H | -4.186060 | 2.204846  | -1.594857 |
| H | -2.250627 | -2.590412 | -1.239301 |

|        |           |           |           |
|--------|-----------|-----------|-----------|
| C      | -5.761501 | -1.835547 | 2.451347  |
| N      | -4.643968 | -0.949260 | 2.045135  |
| C      | -4.291178 | 0.086445  | 3.052052  |
| H      | -5.470582 | -2.424255 | 3.322065  |
| H      | -6.014244 | -2.478967 | 1.612057  |
| H      | -6.626104 | -1.218573 | 2.696851  |
| H      | -4.887722 | -0.452632 | 1.121418  |
| H      | -4.031188 | -0.393832 | 3.995941  |
| H      | -5.148036 | 0.744737  | 3.193636  |
| H      | -3.444007 | 0.665220  | 2.691723  |
| C      | 2.894731  | 0.520951  | 3.120476  |
| N      | 1.830028  | -0.513287 | 3.008985  |
| C      | 1.034720  | -0.711690 | 4.252436  |
| H      | 2.438667  | 1.468357  | 3.396788  |
| H      | 3.391144  | 0.613621  | 2.156467  |
| H      | 3.615291  | 0.200540  | 3.871919  |
| H      | 2.274286  | -1.407278 | 2.715360  |
| H      | 0.479092  | 0.201793  | 4.460283  |
| H      | 1.711981  | -0.941551 | 5.074538  |
| H      | 0.352273  | -1.541846 | 4.084052  |
| C      | 1.127846  | -1.927476 | -3.405695 |
| N      | 1.371687  | -3.082600 | -2.544013 |
| C      | 1.102680  | -4.351663 | -3.211946 |
| H      | 1.851591  | -1.920723 | -4.226743 |
| H      | 1.267145  | -1.009453 | -2.831667 |
| H      | 0.114617  | -1.906058 | -3.838036 |
| H      | 0.772642  | -3.012211 | -1.725925 |
| H      | 1.817033  | -4.500361 | -4.028695 |
| H      | 0.088379  | -4.419813 | -3.641600 |
| H      | 1.227566  | -5.172285 | -2.501528 |
| C      | -2.347541 | 2.916695  | -2.318133 |
| N      | -3.338223 | 2.752480  | -1.225317 |
| C      | -3.832065 | 4.018174  | -0.627656 |
| H      | -2.805613 | 3.480477  | -3.131062 |
| H      | -2.067703 | 1.924362  | -2.670225 |
| H      | -1.474656 | 3.448643  | -1.941058 |
| H      | -2.907482 | 2.176336  | -0.484780 |
| H      | -4.284500 | 4.626402  | -1.411061 |
| H      | -3.008179 | 4.546189  | -0.151389 |
| H      | -4.586903 | 3.761961  | 0.114462  |
| 2SA4MA |           |           |           |
| S      | -1.018757 | 0.815478  | -2.152251 |
| O      | -1.193916 | -0.348183 | -2.990618 |
| O      | -1.830643 | 1.976044  | -2.337770 |

|   |           |           |           |
|---|-----------|-----------|-----------|
| O | -1.154261 | 0.403797  | -0.643624 |
| O | 0.512795  | 1.188698  | -2.312358 |
| H | -0.778267 | -0.518594 | -0.489210 |
| H | 0.707153  | 2.033145  | -1.839971 |
| O | 0.020967  | -4.534095 | 0.753190  |
| O | -0.533972 | -2.882292 | -2.357167 |
| O | 2.627244  | -3.636611 | 0.595289  |
| O | -0.243261 | -2.023776 | -0.287505 |
| O | 3.524822  | -3.457850 | -1.456144 |
| C | 0.122363  | -4.373043 | -0.649166 |
| C | 1.519560  | -4.756773 | -1.188407 |
| C | -0.260588 | -2.957102 | -1.076759 |
| C | 2.657124  | -3.879666 | -0.709296 |
| H | -0.611513 | -5.045040 | -1.092969 |
| H | 1.520389  | -4.738795 | -2.277337 |
| H | 1.728560  | -5.778366 | -0.856429 |
| H | 0.690350  | -3.969818 | 1.167632  |
| H | -0.780184 | -1.958905 | -2.621470 |
| H | 3.405128  | -3.068757 | 0.870543  |
| S | 1.922307  | 3.381798  | 0.258550  |
| O | 1.052025  | 3.497468  | -0.914819 |
| O | 3.248909  | 3.936449  | 0.150426  |
| O | 1.209456  | 4.027115  | 1.456573  |
| O | 2.010025  | 1.871140  | 0.611463  |
| H | 0.176521  | 4.071153  | 1.344570  |
| H | 2.967816  | 1.521092  | 0.576288  |
| O | 6.439681  | -0.477071 | 2.414460  |
| O | 5.520472  | -1.823706 | -0.776145 |
| O | 5.697532  | 2.709741  | 0.222232  |
| O | 4.711107  | -2.159144 | 1.299902  |
| O | 4.374689  | 0.910049  | 0.483601  |
| C | 6.613057  | -0.735682 | 1.043589  |
| C | 6.739158  | 0.587205  | 0.283013  |
| C | 5.497186  | -1.633437 | 0.519626  |
| C | 5.484049  | 1.419465  | 0.352695  |
| H | 7.543404  | -1.299724 | 0.876892  |
| H | 6.952208  | 0.400545  | -0.774300 |
| H | 7.571072  | 1.162277  | 0.690669  |
| H | 5.708218  | -1.036135 | 2.713093  |
| H | 4.783637  | -2.439552 | -1.054843 |
| H | 4.844273  | 3.204644  | 0.215349  |
| O | -3.930767 | 4.809315  | 1.578780  |
| O | -1.425773 | 4.745565  | -0.966139 |
| O | -3.547434 | 2.066141  | 1.080706  |

|   |           |           |           |
|---|-----------|-----------|-----------|
| O | -1.289669 | 4.209548  | 1.219374  |
| O | -4.844433 | 1.363892  | -0.612618 |
| C | -3.449867 | 4.716718  | 0.266472  |
| C | -4.175206 | 3.655409  | -0.593346 |
| C | -1.936549 | 4.526920  | 0.228838  |
| C | -4.219215 | 2.244974  | -0.044947 |
| H | -3.638194 | 5.685721  | -0.204943 |
| H | -3.731173 | 3.591350  | -1.589389 |
| H | -5.213708 | 3.969029  | -0.723041 |
| H | -3.647729 | 4.008879  | 2.039942  |
| H | -0.488204 | 4.455797  | -1.006964 |
| H | -3.629719 | 1.117557  | 1.393118  |
| O | -5.689879 | -3.914908 | 0.195688  |
| O | -2.520908 | -4.377416 | 1.762042  |
| O | -5.190588 | -1.120697 | 0.263852  |
| O | -2.982131 | -3.755387 | -0.354732 |
| O | -3.913754 | -0.409022 | 1.969237  |
| C | -4.780950 | -3.847592 | 1.258802  |
| C | -4.934682 | -2.574391 | 2.132447  |
| C | -3.334133 | -3.990745 | 0.779960  |
| C | -4.616673 | -1.263925 | 1.447412  |
| H | -4.993990 | -4.700946 | 1.906359  |
| H | -4.305985 | -2.643299 | 3.019454  |
| H | -5.982216 | -2.529520 | 2.446257  |
| H | -5.464445 | -3.212364 | -0.427341 |
| H | -1.594528 | -4.418463 | 1.419492  |
| H | -5.010157 | -0.207753 | -0.105221 |

#### 2SA4MA1DMA

|   |           |           |           |
|---|-----------|-----------|-----------|
| S | -0.839875 | -0.250103 | 2.275194  |
| O | -0.414552 | 0.887117  | 3.063664  |
| O | -1.992827 | -0.994101 | 2.669982  |
| O | -1.097827 | 0.226785  | 0.788305  |
| O | 0.421976  | -1.168585 | 2.167709  |
| H | -0.462009 | 0.968828  | 0.547731  |
| H | 0.245435  | -1.991385 | 1.611230  |
| O | 1.333307  | 4.481900  | -1.041089 |
| O | 0.644430  | 3.182877  | 2.220407  |
| O | 3.689881  | 3.045801  | -0.701176 |
| O | 0.461808  | 2.233360  | 0.179978  |
| O | 4.564051  | 2.980437  | 1.368094  |
| C | 1.414095  | 4.434082  | 0.372225  |
| C | 2.857787  | 4.604815  | 0.892336  |
| C | 0.771238  | 3.158955  | 0.916105  |
| C | 3.791476  | 3.461095  | 0.557055  |

|   |           |           |           |
|---|-----------|-----------|-----------|
| H | 0.814176  | 5.265130  | 0.743955  |
| H | 2.854773  | 4.723778  | 1.974467  |
| H | 3.265580  | 5.514803  | 0.441734  |
| H | 1.903574  | 3.780374  | -1.389568 |
| H | 0.244479  | 2.338356  | 2.561085  |
| H | 4.331577  | 2.294915  | -0.881442 |
| S | 1.132319  | -3.547453 | -0.332137 |
| O | 0.032891  | -3.262624 | 0.636774  |
| O | 2.253748  | -4.254627 | 0.269327  |
| O | 0.599898  | -4.155624 | -1.551277 |
| O | 1.641827  | -2.099491 | -0.761736 |
| H | -0.665774 | -3.326760 | -2.248517 |
| H | 2.591376  | -1.946768 | -0.484330 |
| O | 6.651548  | -1.109727 | -1.991819 |
| O | 6.031046  | 0.776375  | 0.990713  |
| O | 4.873849  | -3.724576 | 0.335842  |
| O | 5.393809  | 1.075016  | -1.149622 |
| O | 4.155461  | -1.647638 | -0.141190 |
| C | 6.809642  | -0.783909 | -0.632385 |
| C | 6.491791  | -2.000984 | 0.242960  |
| C | 5.982031  | 0.445216  | -0.276029 |
| C | 5.052697  | -2.442562 | 0.116205  |
| H | 7.853952  | -0.499893 | -0.434924 |
| H | 6.678356  | -1.769295 | 1.296195  |
| H | 7.146515  | -2.827206 | -0.035405 |
| H | 6.071393  | -0.434460 | -2.371014 |
| H | 5.498795  | 1.603448  | 1.158007  |
| H | 3.907208  | -3.955562 | 0.296692  |
| O | -5.822873 | -3.580636 | 0.067640  |
| O | -2.495485 | -3.863561 | 1.345224  |
| O | -3.976708 | -1.138647 | -0.163673 |
| O | -3.314655 | -3.957039 | -0.753413 |
| O | -5.059237 | 0.170381  | 1.296862  |
| C | -4.823679 | -3.511706 | 1.058425  |
| C | -4.862204 | -2.163708 | 1.802755  |
| C | -3.453256 | -3.800043 | 0.452882  |
| C | -4.653272 | -0.930695 | 0.955359  |
| H | -5.004501 | -4.294227 | 1.806081  |
| H | -4.089629 | -2.137503 | 2.575877  |
| H | -5.829821 | -2.058080 | 2.294603  |
| H | -5.356832 | -3.635390 | -0.777982 |
| H | -1.590336 | -3.873967 | 0.944964  |
| H | -3.858061 | -0.278690 | -0.656575 |
| O | -4.387104 | 5.223751  | -0.454295 |

|   |           |           |           |
|---|-----------|-----------|-----------|
| O | -1.241464 | 4.541911  | -2.003007 |
| O | -4.627081 | 2.431866  | -0.018193 |
| O | -1.781022 | 4.571013  | 0.186532  |
| O | -3.711012 | 1.099067  | -1.574453 |
| C | -3.544576 | 4.739997  | -1.461431 |
| C | -4.034598 | 3.416281  | -2.105351 |
| C | -2.095407 | 4.611764  | -0.981300 |
| C | -4.093100 | 2.204011  | -1.202043 |
| H | -3.548458 | 5.489740  | -2.256288 |
| H | -3.413888 | 3.160405  | -2.963411 |
| H | -5.056283 | 3.594883  | -2.456117 |
| H | -4.313799 | 4.627822  | 0.301772  |
| H | -0.317364 | 4.468621  | -1.658370 |
| H | -4.739069 | 1.579281  | 0.503757  |
| C | -1.341989 | -1.359829 | -2.424794 |
| N | -1.535775 | -2.831758 | -2.568123 |
| C | -1.882737 | -3.281714 | -3.940127 |
| H | -0.498032 | -1.056083 | -3.042657 |
| H | -1.128029 | -1.135794 | -1.381921 |
| H | -2.246117 | -0.837003 | -2.732890 |
| H | -2.260833 | -3.163284 | -1.904132 |
| H | -1.077772 | -3.008454 | -4.621589 |
| H | -2.811407 | -2.806220 | -4.254331 |
| H | -2.004948 | -4.363812 | -3.932691 |

#### 2SA4MA2DMA

|   |           |           |           |
|---|-----------|-----------|-----------|
| S | 0.099636  | 1.358278  | 1.918831  |
| O | 1.335042  | 0.741334  | 2.386673  |
| O | -0.464063 | 2.341739  | 2.847323  |
| O | 0.173151  | 1.874439  | 0.536445  |
| O | -0.923469 | 0.111402  | 1.848258  |
| H | 0.197510  | 0.645871  | -0.659094 |
| H | -1.772634 | 0.409724  | 1.433744  |
| O | 2.856571  | -4.426574 | 0.124304  |
| O | 1.890295  | -1.809753 | 2.367386  |
| O | 0.066011  | -4.408892 | -0.003263 |
| O | 2.116286  | -1.820024 | 0.118417  |
| O | -1.094146 | -4.673101 | 1.899727  |
| C | 2.461365  | -3.857208 | 1.364690  |
| C | 1.305394  | -4.632245 | 2.026274  |
| C | 2.143031  | -2.365333 | 1.210121  |
| C | -0.029878 | -4.568972 | 1.315516  |
| H | 3.334260  | -3.916109 | 2.014956  |
| H | 1.148084  | -4.279683 | 3.044942  |
| H | 1.593290  | -5.687459 | 2.078982  |

|   |           |           |           |
|---|-----------|-----------|-----------|
| H | 2.104136  | -4.338826 | -0.478092 |
| H | 1.683303  | -0.828949 | 2.305404  |
| H | -0.846233 | -4.345738 | -0.416843 |
| S | -3.746921 | 1.642781  | -0.443718 |
| O | -3.221744 | 0.848190  | 0.677126  |
| O | -5.208620 | 1.564861  | -0.521331 |
| O | -3.202429 | 3.000244  | -0.503143 |
| O | -3.192335 | 0.960078  | -1.801620 |
| H | -1.720067 | 3.454729  | -1.378488 |
| H | -3.674399 | 0.099241  | -1.890866 |
| O | -4.589192 | -4.103585 | -2.639535 |
| O | -3.538178 | -4.494492 | 0.774180  |
| O | -6.085321 | -0.926335 | -0.242891 |
| O | -2.331801 | -4.140477 | -1.091062 |
| O | -4.398969 | -1.466861 | -1.633176 |
| C | -4.749216 | -4.243689 | -1.255757 |
| C | -5.726812 | -3.217645 | -0.650153 |
| C | -3.404639 | -4.273983 | -0.519382 |
| C | -5.331074 | -1.777307 | -0.890870 |
| H | -5.181638 | -5.236085 | -1.091896 |
| H | -5.846859 | -3.369486 | 0.424146  |
| H | -6.710602 | -3.364062 | -1.105757 |
| H | -4.183780 | -3.237270 | -2.781186 |
| H | -2.646408 | -4.552787 | 1.215580  |
| H | -5.788945 | 0.023512  | -0.377639 |
| O | 1.381164  | 5.002246  | -2.674764 |
| O | -0.867446 | 5.014253  | 0.112185  |
| O | 2.621351  | 2.787514  | -1.573367 |
| O | -0.857805 | 3.762996  | -1.752541 |
| O | 3.410864  | 3.013688  | 0.510931  |
| C | 1.028078  | 5.214816  | -1.333717 |
| C | 2.124135  | 4.800074  | -0.325048 |
| C | -0.332902 | 4.638801  | -0.915398 |
| C | 2.715820  | 3.424108  | -0.519154 |
| H | 0.894677  | 6.293842  | -1.219039 |
| H | 1.761092  | 4.886979  | 0.699391  |
| H | 2.967092  | 5.492846  | -0.425921 |
| H | 1.668247  | 4.081984  | -2.746397 |
| H | -2.548326 | 4.075852  | 1.203487  |
| H | 3.730120  | 1.590638  | -2.046499 |
| O | 7.266796  | -0.658473 | 0.478140  |
| O | 5.043893  | -3.123130 | -0.903994 |
| O | 4.831569  | 0.789712  | -0.149531 |
| O | 5.200981  | -2.308245 | 1.192811  |

|            |           |           |           |
|------------|-----------|-----------|-----------|
| O          | 4.376651  | 0.897494  | -2.344556 |
| C          | 6.651221  | -1.417378 | -0.526448 |
| C          | 6.116929  | -0.558620 | -1.690698 |
| C          | 5.555758  | -2.327100 | 0.038251  |
| C          | 5.046615  | 0.431534  | -1.299977 |
| H          | 7.420206  | -2.075321 | -0.942698 |
| H          | 5.736718  | -1.185212 | -2.498623 |
| H          | 6.949358  | 0.025863  | -2.096612 |
| H          | 6.558378  | -0.271362 | 1.008940  |
| H          | 4.291466  | -3.640289 | -0.522782 |
| H          | 3.850058  | 2.140676  | 0.322888  |
| C          | -0.690172 | -1.176076 | -1.198428 |
| N          | 0.383114  | -0.148669 | -1.317363 |
| C          | 0.551253  | 0.387283  | -2.695666 |
| H          | -0.724402 | -1.510068 | -0.166162 |
| H          | -0.462303 | -2.009454 | -1.859963 |
| H          | -1.636688 | -0.721057 | -1.467243 |
| H          | 1.251142  | -0.576486 | -0.959263 |
| H          | -0.401513 | 0.801386  | -3.021467 |
| H          | 0.860843  | -0.419033 | -3.359942 |
| H          | 1.300606  | 1.173215  | -2.672447 |
| C          | -2.219174 | 5.420124  | 2.751982  |
| N          | -2.482073 | 4.051746  | 2.231835  |
| C          | -3.687327 | 3.402642  | 2.815506  |
| H          | -3.087126 | 6.050422  | 2.558387  |
| H          | -1.350963 | 5.816747  | 2.234624  |
| H          | -2.036345 | 5.358606  | 3.824297  |
| H          | -1.650830 | 3.439740  | 2.424806  |
| H          | -4.574237 | 3.971357  | 2.538146  |
| H          | -3.579876 | 3.378275  | 3.899354  |
| H          | -3.758400 | 2.389802  | 2.426804  |
| 2SA4MA3DMA |           |           |           |
| S          | 0.355946  | -1.111320 | 1.757867  |
| O          | -0.822656 | -0.940291 | 2.609167  |
| O          | 1.353174  | -2.019220 | 2.338202  |
| O          | 0.048852  | -1.419916 | 0.358119  |
| O          | 1.012124  | 0.369396  | 1.761658  |
| H          | 0.274698  | 0.369270  | -1.384959 |
| H          | 1.840660  | 0.344755  | 1.226927  |
| O          | -4.792480 | 2.570920  | 0.150295  |
| O          | -2.673866 | 0.816182  | 2.441389  |
| O          | -2.582870 | 4.239070  | 0.182354  |
| O          | -2.700127 | 0.831195  | 0.181376  |
| O          | -1.644060 | 4.735306  | 2.159838  |



|   |           |           |           |
|---|-----------|-----------|-----------|
| C | -4.213006 | 2.255596  | 1.409342  |
| C | -3.714804 | 3.511434  | 2.153245  |
| C | -3.103547 | 1.203508  | 1.272351  |
| C | -2.539125 | 4.216791  | 1.515212  |
| H | -5.005667 | 1.792418  | 1.996571  |
| H | -3.431070 | 3.256542  | 3.172826  |
| H | -4.541877 | 4.227939  | 2.194522  |
| H | -4.109101 | 3.006664  | -0.377990 |
| H | -1.936368 | 0.117299  | 2.406033  |
| H | -1.795689 | 4.735825  | -0.189002 |
| S | 3.417554  | 0.405231  | -1.089989 |
| O | 3.337336  | 0.223558  | 0.365547  |
| O | 4.458361  | 1.358679  | -1.485258 |
| O | 3.437600  | -0.841855 | -1.843813 |
| O | 2.009011  | 1.104239  | -1.525036 |
| H | 2.448130  | -2.290771 | -1.785036 |
| H | 2.059959  | 2.075616  | -1.289630 |
| O | 1.567197  | 6.440904  | -2.225872 |
| O | 0.606208  | 5.752494  | 1.156659  |
| O | 4.373175  | 3.950175  | -0.950908 |
| O | -0.472057 | 5.491033  | -0.804114 |
| O | 2.141818  | 3.664167  | -0.891208 |
| C | 1.713879  | 6.466152  | -0.827036 |
| C | 3.048855  | 5.832997  | -0.425686 |
| C | 0.510291  | 5.825677  | -0.146376 |
| C | 3.141609  | 4.370012  | -0.793455 |
| H | 1.724395  | 7.507043  | -0.469440 |
| H | 3.193812  | 5.912040  | 0.656227  |
| H | 3.864572  | 6.373951  | -0.906546 |
| H | 0.687793  | 6.079680  | -2.404284 |
| H | -0.228683 | 5.372578  | 1.555509  |
| H | 4.406731  | 2.967444  | -1.144223 |
| O | 0.776423  | -5.610404 | -1.880929 |
| O | 3.070087  | -3.673219 | -0.006525 |
| O | -1.319913 | -3.949736 | -1.239950 |
| O | 1.864236  | -3.088878 | -1.808354 |
| O | -1.946160 | -4.023102 | 0.910717  |
| C | 1.268428  | -5.121165 | -0.658341 |
| C | 0.175343  | -4.899328 | 0.414724  |
| C | 2.161657  | -3.879995 | -0.789334 |
| C | -1.089397 | -4.224921 | -0.059327 |
| H | 1.940936  | -5.888453 | -0.269610 |
| H | 0.564319  | -4.324404 | 1.259300  |
| H | -0.136861 | -5.871725 | 0.808980  |

|   |           |           |           |
|---|-----------|-----------|-----------|
| H | 0.088527  | -4.993425 | -2.167525 |
| H | 4.745128  | -2.154902 | 1.447224  |
| H | -2.754483 | -3.369593 | -1.839264 |
| O | -7.111152 | -2.725696 | 0.289328  |
| O | -5.938068 | 0.401669  | -1.046900 |
| O | -4.249410 | -2.984665 | -0.075942 |
| O | -5.990010 | -0.356545 | 1.075292  |
| O | -3.607755 | -3.020108 | -2.226677 |
| C | -6.773074 | -1.796897 | -0.704869 |
| C | -5.842062 | -2.383551 | -1.784448 |
| C | -6.192861 | -0.511808 | -0.104973 |
| C | -4.492977 | -2.818299 | -1.264292 |
| H | -7.705352 | -1.514353 | -1.203730 |
| H | -5.693341 | -1.676990 | -2.602379 |
| H | -6.320707 | -3.273122 | -2.206825 |
| H | -6.353831 | -2.779323 | 0.887015  |
| H | -5.541186 | 1.202074  | -0.619712 |
| H | -2.775021 | -3.592473 | 0.570141  |
| C | -1.118996 | 1.554589  | -2.336385 |
| N | -0.701602 | 0.276967  | -1.702486 |
| C | -0.789576 | -0.907145 | -2.603530 |
| H | -1.011646 | 2.358257  | -1.611467 |
| H | -2.161131 | 1.473813  | -2.639269 |
| H | -0.482635 | 1.745153  | -3.199467 |
| H | -1.264381 | 0.119906  | -0.850649 |
| H | -0.170258 | -0.721473 | -3.480412 |
| H | -1.828272 | -1.052545 | -2.896744 |
| H | -0.423520 | -1.775122 | -2.062985 |
| C | 4.192149  | -3.464704 | 2.987012  |
| N | 4.095023  | -2.157551 | 2.291086  |
| C | 4.384809  | -0.988150 | 3.158306  |
| H | 5.205566  | -3.601272 | 3.366033  |
| H | 3.945728  | -4.242447 | 2.268184  |
| H | 3.478045  | -3.483217 | 3.809631  |
| H | 3.119875  | -2.069001 | 1.950176  |
| H | 5.387885  | -1.085608 | 3.575037  |
| H | 3.646675  | -0.948166 | 3.958406  |
| H | 4.315066  | -0.089912 | 2.549404  |
| C | 6.835260  | -1.125505 | -0.086501 |
| N | 5.846021  | -2.203199 | 0.039268  |
| C | 6.424988  | -3.531727 | -0.190139 |
| H | 7.574205  | -1.209919 | 0.716111  |
| H | 6.337630  | -0.159020 | -0.004437 |
| H | 7.371949  | -1.154366 | -1.045365 |

|            |           |           |           |
|------------|-----------|-----------|-----------|
| H          | 5.104950  | -2.052841 | -0.642531 |
| H          | 7.143046  | -3.764215 | 0.602300  |
| H          | 6.952968  | -3.603755 | -1.152168 |
| H          | 5.628552  | -4.276132 | -0.172682 |
| 2SA4MA4DMA |           |           |           |
| S          | -0.012328 | -0.962144 | -1.727414 |
| O          | 1.237719  | -0.751392 | -2.450582 |
| O          | -1.002417 | -1.728880 | -2.484673 |
| O          | 0.167144  | -1.490930 | -0.360640 |
| O          | -0.593387 | 0.532619  | -1.553883 |
| H          | 0.366870  | -0.798896 | 2.657307  |
| H          | -1.516398 | 0.474864  | -1.207435 |
| O          | 4.745356  | 3.122698  | -0.170373 |
| O          | 2.690241  | 1.387241  | -2.534638 |
| O          | 2.218409  | 4.380818  | -0.007598 |
| O          | 2.893063  | 1.175452  | -0.298064 |
| O          | 1.318221  | 5.186951  | -1.900700 |
| C          | 4.142185  | 2.887572  | -1.439708 |
| C          | 3.478387  | 4.147734  | -2.022113 |
| C          | 3.169603  | 1.706232  | -1.356070 |
| C          | 2.225934  | 4.619797  | -1.316011 |
| H          | 4.951220  | 2.581900  | -2.103135 |
| H          | 3.216766  | 3.983998  | -3.066747 |
| H          | 4.204850  | 4.966232  | -1.981051 |
| H          | 4.024394  | 3.321564  | 0.444275  |
| H          | 2.092035  | 0.579200  | -2.471566 |
| H          | 1.358458  | 4.692971  | 0.402846  |
| S          | -3.861767 | 0.235461  | 0.536360  |
| O          | -3.156916 | 0.303732  | -0.750602 |
| O          | -5.066629 | 1.075718  | 0.555638  |
| O          | -4.092620 | -1.135477 | 0.999500  |
| O          | -2.872751 | 0.841277  | 1.651946  |
| H          | -2.834225 | -2.298821 | 1.178774  |
| H          | -2.907911 | 1.834177  | 1.592496  |
| O          | -2.220242 | 5.996839  | 2.542809  |
| O          | -1.007220 | 5.952061  | -0.836962 |
| O          | -4.818536 | 3.685755  | 0.159145  |
| O          | -0.083877 | 5.167848  | 1.060511  |
| O          | -2.924663 | 3.491351  | 1.358806  |
| C          | -2.269929 | 6.203695  | 1.157426  |
| C          | -3.553273 | 5.647473  | 0.511247  |
| C          | -1.001022 | 5.704935  | 0.458103  |
| C          | -3.733972 | 4.161727  | 0.719160  |
| H          | -2.275585 | 7.287765  | 1.005194  |

|   |           |           |           |
|---|-----------|-----------|-----------|
| H | -3.577061 | 5.851656  | -0.561684 |
| H | -4.418112 | 6.150798  | 0.951945  |
| H | -2.062696 | 5.052648  | 2.673096  |
| H | -0.148531 | 5.658887  | -1.254858 |
| H | -4.916329 | 2.697732  | 0.309794  |
| O | -0.379548 | -4.918240 | 1.992277  |
| O | -2.581074 | -3.808045 | -0.612211 |
| O | 1.848077  | -3.719651 | 1.068054  |
| O | -2.114676 | -2.944302 | 1.406836  |
| O | 2.200117  | -3.679007 | -1.142922 |
| C | -0.848097 | -4.865430 | 0.665800  |
| C | 0.267159  | -4.808590 | -0.410232 |
| C | -1.924261 | -3.794930 | 0.410463  |
| C | 1.492501  | -3.981583 | -0.088441 |
| H | -1.396834 | -5.796145 | 0.485241  |
| H | -0.143987 | -4.472993 | -1.361536 |
| H | 0.652767  | -5.822739 | -0.566057 |
| H | 0.467089  | -4.443469 | 2.010713  |
| H | -4.460570 | -2.312628 | -2.172435 |
| H | 3.478344  | -3.399296 | 1.465062  |
| O | 7.346141  | -1.985437 | -1.146985 |
| O | 6.078552  | 0.856060  | 0.650461  |
| O | 4.470091  | -2.362926 | -0.380138 |
| O | 6.076333  | 0.345899  | -1.546769 |
| O | 4.399851  | -3.138008 | 1.727390  |
| C | 7.082904  | -1.203223 | -0.010507 |
| C | 6.363061  | -2.003345 | 1.084885  |
| C | 6.346546  | 0.080279  | -0.397745 |
| C | 4.990259  | -2.510378 | 0.712672  |
| H | 8.041392  | -0.880133 | 0.416838  |
| H | 6.271228  | -1.410799 | 1.998438  |
| H | 6.972348  | -2.876392 | 1.337230  |
| H | 6.753702  | -1.663126 | -1.841120 |
| H | 5.608980  | 1.676892  | 0.350070  |
| H | 2.999069  | -3.138183 | -0.897296 |
| C | 0.471936  | 1.172419  | 1.920202  |
| N | 0.968430  | -0.228520 | 1.989156  |
| C | 2.383633  | -0.332141 | 2.430310  |
| H | -0.558981 | 1.153873  | 1.578578  |
| H | 1.091788  | 1.726984  | 1.219999  |
| H | 0.525810  | 1.619341  | 2.913715  |
| H | 0.843243  | -0.664029 | 1.050280  |
| H | 2.475291  | 0.106358  | 3.425032  |
| H | 3.015393  | 0.196879  | 1.721175  |

|     |           |           |           |
|-----|-----------|-----------|-----------|
| H   | 2.663090  | -1.381921 | 2.470626  |
| C   | -3.464583 | -3.404142 | -3.656635 |
| N   | -3.655913 | -2.170541 | -2.853394 |
| C   | -3.896463 | -0.951351 | -3.666884 |
| H   | -4.360454 | -3.595452 | -4.248483 |
| H   | -3.275864 | -4.225704 | -2.969939 |
| H   | -2.603046 | -3.269235 | -4.309115 |
| H   | -2.784686 | -2.023986 | -2.312986 |
| H   | -4.801922 | -1.084442 | -4.259953 |
| H   | -3.038562 | -0.787078 | -4.317261 |
| H   | -4.003812 | -0.108604 | -2.987521 |
| C   | -7.039996 | -1.751727 | -1.253140 |
| N   | -5.840952 | -2.575483 | -1.057598 |
| C   | -6.146762 | -4.002046 | -0.907380 |
| H   | -7.490878 | -1.973248 | -2.225384 |
| H   | -6.764875 | -0.696271 | -1.226199 |
| H   | -7.802363 | -1.925521 | -0.480051 |
| H   | -5.360996 | -2.248882 | -0.219653 |
| H   | -6.576727 | -4.389274 | -1.836291 |
| H   | -6.864882 | -4.199722 | -0.098110 |
| H   | -5.224326 | -4.546023 | -0.698642 |
| C   | 0.279661  | -2.593838 | 4.758257  |
| N   | -0.542045 | -1.870505 | 3.781457  |
| C   | -1.693740 | -1.201670 | 4.404083  |
| H   | 0.720002  | -1.887276 | 5.467944  |
| H   | 1.092187  | -3.113610 | 4.246655  |
| H   | -0.295239 | -3.335693 | 5.330207  |
| H   | -0.900561 | -2.536908 | 3.098139  |
| H   | -1.341568 | -0.423779 | 5.088287  |
| H   | -2.322421 | -1.896954 | 4.978406  |
| H   | -2.305134 | -0.730225 | 3.634159  |
| 3MA |           |           |           |
| O   | 0.528021  | 4.646752  | 1.363323  |
| O   | 2.027803  | 2.526561  | -1.115413 |
| O   | -1.243111 | 2.497286  | 0.700156  |
| O   | 1.954631  | 2.348565  | 1.128820  |
| O   | -2.246755 | 2.650896  | -1.303956 |
| C   | 0.843651  | 4.210872  | 0.069284  |
| C   | -0.387635 | 4.091338  | -0.855367 |
| C   | 1.671136  | 2.923893  | 0.090096  |
| C   | -1.385865 | 3.007004  | -0.513904 |
| H   | 1.490558  | 4.978151  | -0.368165 |
| H   | -0.085154 | 3.933926  | -1.891594 |
| H   | -0.925670 | 5.043270  | -0.816210 |

|         |           |           |           |
|---------|-----------|-----------|-----------|
| H       | 0.194851  | 3.882511  | 1.849422  |
| H       | 2.555267  | 1.680256  | -1.061947 |
| H       | -1.920364 | 1.780820  | 0.859359  |
| O       | -3.901904 | -1.876850 | 1.637966  |
| O       | -3.727022 | 0.445414  | -1.083888 |
| O       | -1.394889 | -1.544741 | -0.694408 |
| O       | -2.983761 | 0.516782  | 1.040708  |
| O       | -1.538169 | -3.745428 | -0.265196 |
| C       | -4.128079 | -1.449534 | 0.316718  |
| C       | -3.557101 | -2.487481 | -0.671033 |
| C       | -3.544656 | -0.054355 | 0.110735  |
| C       | -2.063152 | -2.672496 | -0.516849 |
| H       | -5.206741 | -1.367955 | 0.122499  |
| H       | -3.766017 | -2.168021 | -1.695495 |
| H       | -4.039163 | -3.445970 | -0.486368 |
| H       | -3.473871 | -1.138881 | 2.095873  |
| H       | -3.239669 | 1.314588  | -1.173126 |
| H       | -0.414572 | -1.689105 | -0.555887 |
| O       | 4.158007  | -2.272222 | -1.305526 |
| O       | 3.126442  | -0.040465 | 1.301217  |
| O       | 1.046502  | -4.040423 | 0.433352  |
| O       | 3.363197  | 0.226007  | -0.923767 |
| O       | 1.165131  | -1.897958 | -0.229413 |
| C       | 3.979720  | -1.876014 | 0.032899  |
| C       | 3.099789  | -2.896452 | 0.761271  |
| C       | 3.431083  | -0.452811 | 0.094842  |
| C       | 1.675908  | -2.901303 | 0.257850  |
| H       | 4.950138  | -1.844378 | 0.551012  |
| H       | 3.063876  | -2.669327 | 1.831578  |
| H       | 3.530246  | -3.891905 | 0.648653  |
| H       | 3.979339  | -1.490734 | -1.848225 |
| H       | 2.731522  | 0.877162  | 1.265807  |
| H       | 0.093661  | -3.961776 | 0.141763  |
| 3MA1DMA |           |           |           |
| O       | -2.298469 | -3.867869 | 1.672379  |
| O       | -2.758089 | -2.000774 | -1.342283 |
| O       | -0.056721 | -2.326960 | 0.354437  |
| O       | -3.123762 | -1.483296 | 0.820067  |
| O       | 1.116483  | -3.892412 | -0.737168 |
| C       | -2.460417 | -3.717136 | 0.282270  |
| C       | -1.230562 | -4.247833 | -0.458136 |
| C       | -2.802406 | -2.269911 | -0.064457 |
| C       | 0.058353  | -3.478761 | -0.283055 |
| H       | -3.321846 | -4.309497 | -0.066316 |

|   |           |           |           |
|---|-----------|-----------|-----------|
| H | -1.426982 | -4.279827 | -1.533072 |
| H | -1.039839 | -5.275532 | -0.141496 |
| H | -2.646377 | -3.057795 | 2.071892  |
| H | -2.937752 | -1.017486 | -1.509507 |
| H | 0.830574  | -1.875629 | 0.396172  |
| O | 4.756611  | 0.296250  | 0.660004  |
| O | 3.292884  | -2.401619 | -1.020129 |
| O | 2.931243  | 2.140823  | -0.073595 |
| O | 2.280452  | -1.047489 | 0.453024  |
| O | 1.821462  | 1.640619  | -1.960699 |
| C | 4.380022  | -0.340160 | -0.534420 |
| C | 3.966480  | 0.663657  | -1.643336 |
| C | 3.217346  | -1.309062 | -0.305674 |
| C | 2.839393  | 1.568976  | -1.163080 |
| H | 5.224346  | -0.932855 | -0.892487 |
| H | 3.676303  | 0.142300  | -2.555520 |
| H | 4.837617  | 1.288058  | -1.860051 |
| H | 4.253134  | 1.130797  | 0.690379  |
| H | 2.485739  | -2.985681 | -0.889651 |
| H | 0.554657  | 1.697619  | 1.424350  |
| O | -2.791538 | 3.966873  | 0.875154  |
| O | -0.165635 | 3.006841  | -1.326992 |
| O | -3.555787 | 1.175915  | 0.336304  |
| O | -0.623657 | 2.484127  | 0.825360  |
| O | -3.072454 | 0.535553  | -1.759353 |
| C | -2.240863 | 3.717855  | -0.394194 |
| C | -3.199047 | 2.882479  | -1.292297 |
| C | -0.869433 | 3.018667  | -0.293105 |
| C | -3.272770 | 1.421362  | -0.932960 |
| H | -2.093253 | 4.675145  | -0.900917 |
| H | -2.887002 | 2.941766  | -2.333861 |
| H | -4.195845 | 3.319605  | -1.185235 |
| H | -2.387879 | 3.301786  | 1.451452  |
| H | 1.034689  | 2.238457  | -1.594221 |
| H | -3.480269 | 0.205250  | 0.515766  |
| C | 1.989664  | 2.101949  | 2.890237  |
| N | 1.199583  | 1.137522  | 2.082464  |
| C | 0.348433  | 0.223481  | 2.886669  |
| H | 1.302744  | 2.705162  | 3.482738  |
| H | 2.541850  | 2.737952  | 2.203575  |
| H | 2.674576  | 1.562737  | 3.545576  |
| H | 1.826956  | 0.580323  | 1.488750  |
| H | -0.324026 | 0.821323  | 3.500533  |
| H | 0.973309  | -0.405971 | 3.520806  |

H -0.241839 -0.396695 2.214245  
3MA2DMA  
O 1.118973 4.230175 2.061849  
O 3.334517 2.848046 -0.385654  
O -0.661547 2.903261 0.307235  
O 2.228795 1.857078 1.307506  
O -0.652929 3.520543 -1.849740  
C 1.800469 4.184858 0.838098  
C 0.916845 4.568378 -0.372856  
C 2.484067 2.833264 0.616212  
C -0.203999 3.611582 -0.719071  
H 2.597699 4.930535 0.896601  
H 1.519694 4.696986 -1.272009  
H 0.453569 5.533327 -0.142982  
H 0.511006 3.480605 2.073151  
H 3.739847 1.938127 -0.526119  
H -1.374681 2.266804 -0.002743  
O -4.233187 -0.904188 -0.950668  
O -2.427448 1.668234 -2.660805  
O -1.988609 -2.277044 -0.797313  
O -2.430484 1.121701 -0.480849  
O -0.475465 -1.975216 -2.436026  
C -3.612917 -0.297905 -2.058455  
C -2.725254 -1.296940 -2.842959  
C -2.768451 0.907868 -1.642594  
C -1.623563 -1.905867 -1.958827  
H -4.390801 0.084398 -2.726368  
H -2.272684 -0.816444 -3.708836  
H -3.375602 -2.104532 -3.192027  
H -3.580311 -1.582400 -0.661567  
H -1.806380 2.391884 -2.372814  
H -1.283471 -2.062032 0.693525  
O 3.891037 -3.481841 1.112313  
O 1.822827 -2.618819 -1.665120  
O 3.143924 -0.608392 0.810260  
O 1.329415 -3.254610 0.444950  
O 4.326407 0.433929 -0.783146  
C 3.625141 -3.178431 -0.236410  
C 4.427299 -1.952832 -0.703118  
C 2.116725 -3.016812 -0.460133  
C 3.960198 -0.595847 -0.229618  
H 3.940834 -4.018409 -0.872324  
H 4.453974 -1.906039 -1.792327  
H 5.459499 -2.075500 -0.359893



|         |           |           |           |
|---------|-----------|-----------|-----------|
| H       | 3.021254  | -3.539186 | 1.534538  |
| H       | 0.818248  | -2.443781 | -1.842269 |
| H       | 2.860277  | 0.320829  | 1.030313  |
| C       | -1.147028 | -3.080654 | 2.497580  |
| N       | -1.236836 | -1.820647 | 1.718985  |
| C       | -0.124009 | -0.870107 | 1.974789  |
| H       | -0.230768 | -3.596470 | 2.219328  |
| H       | -2.006141 | -3.703302 | 2.249894  |
| H       | -1.152161 | -2.853155 | 3.564522  |
| H       | -2.157378 | -1.332855 | 1.917357  |
| H       | 0.819878  | -1.354921 | 1.739723  |
| H       | -0.144284 | -0.561929 | 3.021065  |
| H       | -0.257575 | 0.002288  | 1.337373  |
| C       | -4.876655 | -1.209758 | 2.489634  |
| N       | -3.720295 | -0.406907 | 2.075884  |
| C       | -3.592347 | 0.829852  | 2.853482  |
| H       | -4.730117 | -1.575760 | 3.510241  |
| H       | -4.982841 | -2.069277 | 1.825609  |
| H       | -5.817512 | -0.641532 | 2.465066  |
| H       | -3.831150 | -0.165531 | 1.089980  |
| H       | -3.365342 | 0.593013  | 3.897322  |
| H       | -4.508755 | 1.437873  | 2.838786  |
| H       | -2.776850 | 1.432517  | 2.450947  |
| 3MA3DMA |           |           |           |
| O       | -4.384734 | -1.866608 | -2.654055 |
| O       | -2.260869 | -3.410547 | -0.204610 |
| O       | -3.418027 | -0.054676 | -0.615459 |
| O       | -1.772997 | -2.458454 | -2.185603 |
| O       | -4.442927 | -0.252711 | 1.372386  |
| C       | -4.082688 | -2.595978 | -1.493835 |
| C       | -4.728527 | -2.014413 | -0.221231 |
| C       | -2.574946 | -2.810232 | -1.333978 |
| C       | -4.183380 | -0.688774 | 0.263159  |
| H       | -4.511355 | -3.593497 | -1.639572 |
| H       | -4.648230 | -2.713036 | 0.612523  |
| H       | -5.794242 | -1.869813 | -0.421710 |
| H       | -3.827385 | -1.079260 | -2.646300 |
| H       | -1.266109 | -3.477941 | -0.109278 |
| H       | -3.067550 | 0.799483  | -0.217266 |
| O       | -1.234096 | 4.553999  | 1.267448  |
| O       | -3.273882 | 1.897051  | 2.480203  |
| O       | 0.846489  | 2.912682  | 1.037728  |
| O       | -2.415682 | 2.161377  | 0.419743  |
| O       | 1.021556  | 1.236857  | 2.526563  |

|   |           |           |           |
|---|-----------|-----------|-----------|
| C | -1.671910 | 3.622374  | 2.222100  |
| C | -0.495261 | 3.003796  | 3.019513  |
| C | -2.495732 | 2.493121  | 1.598478  |
| C | 0.544245  | 2.323159  | 2.116050  |
| H | -2.338098 | 4.133259  | 2.923147  |
| H | -0.856942 | 2.289493  | 3.758281  |
| H | 0.002790  | 3.821863  | 3.549459  |
| H | -0.366306 | 4.204755  | 0.976844  |
| H | -3.742572 | 1.118357  | 2.073384  |
| H | 1.509849  | 2.367312  | -2.067759 |
| O | 3.212814  | -1.130877 | -2.089554 |
| O | 2.599037  | -0.157795 | 1.248452  |
| O | 0.875328  | -2.734430 | -2.001797 |
| O | 1.287151  | 0.063905  | -0.565670 |
| O | 0.374183  | -3.434338 | 0.072146  |
| C | 3.149957  | -1.431012 | -0.701444 |
| C | 2.661229  | -2.876821 | -0.435774 |
| C | 2.247260  | -0.415331 | 0.020776  |
| C | 1.195605  | -3.053565 | -0.748228 |
| H | 4.165442  | -1.342455 | -0.315084 |
| H | 2.837919  | -3.144506 | 0.609429  |
| H | 3.241445  | -3.539682 | -1.084707 |
| H | 2.342612  | -1.350887 | -2.452420 |
| H | 1.904420  | 0.508541  | 1.744351  |
| H | -0.117709 | -2.696834 | -2.104712 |
| C | 0.329698  | 4.078410  | -1.800363 |
| N | 0.558696  | 2.617644  | -1.666751 |
| C | -0.495555 | 1.793208  | -2.311746 |
| H | 0.301981  | 4.348683  | -2.856544 |
| H | 1.142277  | 4.604507  | -1.302114 |
| H | -0.613482 | 4.336147  | -1.319898 |
| H | 0.625768  | 2.398257  | -0.648538 |
| H | -0.494240 | 1.989314  | -3.385160 |
| H | -1.458192 | 2.061751  | -1.882093 |
| H | -0.276154 | 0.748249  | -2.112648 |
| C | 3.638022  | 2.258319  | -3.937854 |
| N | 3.197148  | 1.979255  | -2.566994 |
| C | 4.077907  | 2.586273  | -1.558737 |
| H | 3.561716  | 3.330268  | -4.142071 |
| H | 2.996271  | 1.729691  | -4.646043 |
| H | 4.678112  | 1.952788  | -4.121835 |
| H | 3.200951  | 0.967333  | -2.425880 |
| H | 4.071071  | 3.674318  | -1.671608 |
| H | 5.119476  | 2.245567  | -1.643809 |

|         |           |           |           |
|---------|-----------|-----------|-----------|
| H       | 3.710344  | 2.348360  | -0.558684 |
| C       | 1.979604  | -3.314296 | 3.566387  |
| N       | 3.205420  | -2.850526 | 2.923376  |
| C       | 4.390874  | -3.037332 | 3.750839  |
| H       | 2.034137  | -4.396933 | 3.720094  |
| H       | 1.127884  | -3.114417 | 2.913516  |
| H       | 1.788508  | -2.845964 | 4.547009  |
| H       | 3.107442  | -1.869323 | 2.679298  |
| H       | 4.579073  | -4.106901 | 3.889851  |
| H       | 4.312447  | -2.581173 | 4.753332  |
| H       | 5.262602  | -2.609193 | 3.249759  |
| 3MA4DMA |           |           |           |
| O       | -4.231056 | -1.462404 | -2.603679 |
| O       | -2.463978 | -3.158756 | -0.008372 |
| O       | -3.513832 | 0.143429  | -0.383087 |
| O       | -1.831492 | -2.748063 | -2.124534 |
| O       | -4.054620 | -0.617563 | 1.667651  |
| C       | -4.141445 | -2.348948 | -1.515320 |
| C       | -4.841128 | -1.821261 | -0.248710 |
| C       | -2.683876 | -2.767529 | -1.251592 |
| C       | -4.095808 | -0.699312 | 0.451975  |
| H       | -4.656183 | -3.264442 | -1.827890 |
| H       | -4.989020 | -2.614982 | 0.481573  |
| H       | -5.824133 | -1.447532 | -0.551416 |
| H       | -3.928956 | -0.603984 | -2.276841 |
| H       | -1.488436 | -3.335355 | 0.136060  |
| H       | -2.976698 | 0.939894  | 0.042122  |
| O       | -1.068905 | 4.669820  | -0.224966 |
| O       | -2.093654 | 2.485559  | 2.438150  |
| O       | 1.224429  | 3.072527  | -0.153679 |
| O       | -2.104923 | 2.129259  | 0.213007  |
| O       | 1.633983  | 2.182506  | 1.869029  |
| C       | -1.163620 | 4.187032  | 1.097018  |
| C       | 0.230046  | 4.101392  | 1.771054  |
| C       | -1.865201 | 2.815436  | 1.243732  |
| C       | 1.094984  | 3.065778  | 1.072789  |
| H       | -1.770122 | 4.899620  | 1.661561  |
| H       | 0.125035  | 3.853309  | 2.824549  |
| H       | 0.714660  | 5.077653  | 1.676134  |
| H       | -0.279419 | 4.245756  | -0.592756 |
| H       | -1.943590 | 1.057414  | 2.858982  |
| H       | 1.084911  | 1.371100  | -2.892976 |
| O       | 3.024021  | -1.605915 | -2.072838 |
| O       | 2.837571  | 0.217334  | 0.847089  |

|   |           |           |           |
|---|-----------|-----------|-----------|
| O | 0.755056  | -3.192816 | -1.718799 |
| O | 1.087624  | -0.267696 | -0.485058 |
| O | 0.151538  | -3.348683 | 0.438247  |
| C | 3.030894  | -1.647628 | -0.643708 |
| C | 2.481132  | -2.989475 | -0.103449 |
| C | 2.240933  | -0.456325 | -0.045819 |
| C | 1.018247  | -3.187537 | -0.408954 |
| H | 4.074016  | -1.563379 | -0.341554 |
| H | 2.643408  | -3.035298 | 0.974424  |
| H | 3.041278  | -3.798162 | -0.583795 |
| H | 2.173980  | -1.970664 | -2.356539 |
| H | 2.131950  | 1.412493  | 1.363933  |
| H | -0.229095 | -3.134604 | -1.877107 |
| C | -0.435157 | 2.827380  | -2.832444 |
| N | 0.124676  | 1.507769  | -2.444474 |
| C | -0.758536 | 0.364598  | -2.789581 |
| H | -0.712276 | 2.796337  | -3.886706 |
| H | 0.328251  | 3.586836  | -2.676624 |
| H | -1.302305 | 3.046078  | -2.211113 |
| H | 0.321765  | 1.479257  | -1.432802 |
| H | -0.903773 | 0.334084  | -3.869627 |
| H | -1.714859 | 0.491424  | -2.287911 |
| H | -0.285487 | -0.544701 | -2.436301 |
| C | 3.065651  | 1.017530  | -4.833142 |
| N | 2.763172  | 1.148564  | -3.404190 |
| C | 3.574986  | 2.184333  | -2.746761 |
| H | 2.781348  | 1.933753  | -5.358849 |
| H | 2.494215  | 0.189141  | -5.257851 |
| H | 4.132378  | 0.834397  | -5.027276 |
| H | 2.952659  | 0.252834  | -2.948080 |
| H | 3.365716  | 3.157263  | -3.200975 |
| H | 4.653535  | 1.993352  | -2.838042 |
| H | 3.310447  | 2.240375  | -1.689965 |
| C | 3.466521  | -1.781929 | 4.158573  |
| N | 4.051041  | -1.863707 | 2.827308  |
| C | 5.501419  | -1.999695 | 2.858688  |
| H | 3.614942  | -2.728309 | 4.689784  |
| H | 2.389888  | -1.613355 | 4.077454  |
| H | 3.892898  | -0.979154 | 4.786655  |
| H | 3.792887  | -1.040274 | 2.286556  |
| H | 5.776013  | -2.961924 | 3.304166  |
| H | 6.012142  | -1.209012 | 3.436888  |
| H | 5.896740  | -1.981749 | 1.840087  |
| C | -0.543215 | -0.493888 | 2.566262  |

|   |           |           |          |
|---|-----------|-----------|----------|
| N | -1.809050 | 0.018204  | 3.153709 |
| C | -1.899914 | -0.102031 | 4.625472 |
| H | 0.292835  | 0.055972  | 2.995994 |
| H | -0.546739 | -0.321514 | 1.491005 |
| H | -0.440856 | -1.561061 | 2.764215 |
| H | -2.621188 | -0.433642 | 2.706048 |
| H | -1.096843 | 0.477093  | 5.081017 |
| H | -1.811561 | -1.147898 | 4.923160 |
| H | -2.860823 | 0.293904  | 4.952385 |

### 3SA1MA

|   |           |           |           |
|---|-----------|-----------|-----------|
| S | 1.217595  | -2.689695 | 0.721777  |
| O | 1.130932  | -1.866564 | -0.502724 |
| O | 1.992740  | -3.874736 | 0.707111  |
| O | 1.780511  | -1.773031 | 1.864525  |
| O | -0.247217 | -3.014963 | 1.147559  |
| H | 1.267821  | -0.931351 | 1.919473  |
| H | -0.923632 | -2.394222 | 0.730086  |
| S | -0.005962 | 1.710718  | 1.375503  |
| O | 0.124698  | 0.374491  | 1.901792  |
| O | -0.199895 | 1.811605  | -0.070342 |
| O | -1.148471 | 2.481154  | 2.089322  |
| O | 1.184193  | 2.614232  | 1.821269  |
| H | -2.020221 | 2.148307  | 1.708522  |
| H | 1.994831  | 2.264650  | 1.356844  |
| S | 3.154820  | 1.084258  | -1.100587 |
| O | 2.866640  | 1.222175  | 0.322677  |
| O | 4.276313  | 1.730617  | -1.677183 |
| O | 3.273468  | -0.444442 | -1.436789 |
| O | 1.847777  | 1.530922  | -1.884585 |
| H | 2.517812  | -0.965816 | -1.066216 |
| H | 1.086872  | 1.598883  | -1.263313 |
| O | -4.849167 | -0.648952 | 0.094029  |
| O | -2.745618 | 1.908605  | -1.290175 |
| O | -1.110215 | -1.475944 | -2.046459 |
| O | -3.197238 | 1.388508  | 0.857781  |
| O | -2.080448 | -1.576148 | -0.021926 |
| C | -4.218911 | 0.085837  | -0.910635 |
| C | -3.373521 | -0.783536 | -1.878378 |
| C | -3.349805 | 1.206847  | -0.335252 |
| C | -2.124546 | -1.322161 | -1.224699 |
| H | -5.008265 | 0.558449  | -1.502392 |
| H | -3.098416 | -0.230408 | -2.775257 |
| H | -3.992478 | -1.635016 | -2.176624 |
| H | -4.158181 | -1.007812 | 0.666866  |

|            |           |           |           |
|------------|-----------|-----------|-----------|
| H          | -2.022139 | 2.434636  | -0.905817 |
| H          | -0.298576 | -1.746931 | -1.552550 |
| 3SA1MA1DMA |           |           |           |
| S          | -0.097409 | -2.534249 | -1.295307 |
| O          | 0.211613  | -2.292740 | 0.124321  |
| O          | -0.741208 | -3.743608 | -1.666372 |
| O          | -0.973613 | -1.350485 | -1.816365 |
| O          | 1.256031  | -2.399416 | -2.066957 |
| H          | -0.549523 | -0.436031 | -1.667114 |
| H          | 1.925200  | -1.844624 | -1.553313 |
| S          | -0.413107 | 2.091721  | -0.689963 |
| O          | -0.016824 | 0.983795  | -1.571840 |
| O          | -0.124163 | 1.767758  | 0.739592  |
| O          | 0.500705  | 3.316891  | -1.058397 |
| O          | -1.781067 | 2.553456  | -0.886475 |
| H          | 1.452592  | 3.045403  | -0.923280 |
| H          | -3.087133 | 1.493276  | -1.177980 |
| S          | -2.353290 | -0.562684 | 2.236776  |
| O          | -2.821268 | -0.752509 | 0.867876  |
| O          | -3.198178 | -0.913112 | 3.324255  |
| O          | -0.985411 | -1.338391 | 2.354302  |
| O          | -1.947823 | 0.939302  | 2.437923  |
| H          | -0.685028 | -1.676129 | 1.474064  |
| H          | -1.268996 | 1.250806  | 1.766473  |
| O          | 5.274050  | 0.949136  | -0.680636 |
| O          | 2.452181  | 1.436102  | 1.464019  |
| O          | 2.686406  | -2.062468 | 1.278088  |
| O          | 2.938541  | 2.349664  | -0.540232 |
| O          | 3.032918  | -1.049718 | -0.698859 |
| C          | 4.592510  | 0.958901  | 0.543244  |
| C          | 4.422997  | -0.450283 | 1.158072  |
| C          | 3.238550  | 1.673083  | 0.424969  |
| C          | 3.318317  | -1.222776 | 0.484891  |
| H          | 5.205603  | 1.547422  | 1.233309  |
| H          | 4.213448  | -0.399856 | 2.225643  |
| H          | 5.364827  | -0.988167 | 1.016631  |
| H          | 4.665914  | 0.602792  | -1.345957 |
| H          | 1.520442  | 1.720381  | 1.277738  |
| H          | 1.872903  | -2.396316 | 0.835846  |
| C          | -5.085536 | 1.613035  | -0.649468 |
| N          | -3.896539 | 0.838082  | -1.096291 |
| C          | -4.080388 | 0.075580  | -2.362465 |
| H          | -5.353676 | 2.335356  | -1.419445 |
| H          | -4.829327 | 2.135878  | 0.270599  |

H -5.915391 0.930470 -0.470166  
H -3.608420 0.187359 -0.338323  
H -4.282733 0.773591 -3.174093  
H -4.916125 -0.613628 -2.245947  
H -3.169720 -0.485666 -2.564132

3SA1MA2DMA

S 2.023226 2.035483 -1.004751  
O 1.636145 2.388860 0.398645  
O 3.399189 2.290694 -1.334677  
O 1.600221 0.644840 -1.296236  
O 1.160740 3.000925 -1.928833  
H 0.263042 -0.047060 -1.857899  
H 0.252095 3.124511 -1.551439  
S -0.353365 -1.986497 -1.239950  
O -0.491431 -0.666783 -2.097659  
O -0.670306 -1.583226 0.179940  
O -1.395205 -2.872646 -1.753753  
O 1.008160 -2.485664 -1.353184  
H -2.736467 -2.901160 -0.750084  
H 2.659979 -1.531754 -1.387603  
S 1.970890 -0.594629 2.517836  
O 3.086904 -0.557470 1.586080  
O 2.253084 -0.667777 3.911457  
O 1.023879 0.615652 2.201058  
O 1.042619 -1.828548 2.180851  
H 1.376133 1.227818 1.478148  
H 0.489435 -1.690989 1.360700  
O -3.905920 2.446724 -1.122210  
O -1.865918 0.765353 0.498149  
O -0.572923 3.540261 1.303635  
O -3.910185 -0.175025 0.480455  
O -1.281968 3.353356 -0.820270  
C -3.742290 2.224611 0.266915  
C -2.907771 3.328123 0.943652  
C -3.178561 0.805323 0.449734  
C -1.502399 3.408812 0.388622  
H -4.743043 2.214346 0.700887  
H -2.861446 3.185360 2.023814  
H -3.408591 4.279982 0.742779  
H -3.032093 2.694454 -1.466757  
H -1.481977 -0.154702 0.441897  
H 0.323112 3.356589 0.914333  
C 3.999957 -2.883490 -0.604783  
N 3.597366 -1.495616 -0.959022

|   |           |           |           |
|---|-----------|-----------|-----------|
| C | 4.559480  | -0.766711 | -1.831926 |
| H | 4.115207  | -3.467476 | -1.516941 |
| H | 3.216546  | -3.316052 | 0.012553  |
| H | 4.938926  | -2.850648 | -0.053958 |
| H | 3.442796  | -0.974321 | -0.075955 |
| H | 4.631171  | -1.284562 | -2.788116 |
| H | 5.533194  | -0.754174 | -1.342932 |
| H | 4.202737  | 0.252352  | -1.967058 |
| C | -4.793675 | -3.249476 | -0.754200 |
| N | -3.537278 | -2.843528 | -0.073511 |
| C | -3.196116 | -3.635005 | 1.138004  |
| H | -4.713679 | -4.287987 | -1.074333 |
| H | -4.940102 | -2.607728 | -1.621491 |
| H | -5.632174 | -3.133285 | -0.068143 |
| H | -3.607273 | -1.833639 | 0.186536  |
| H | -3.085673 | -4.683702 | 0.863563  |
| H | -3.987722 | -3.524560 | 1.878793  |
| H | -2.255185 | -3.256646 | 1.532600  |

#### 3SA1MA3DMA

|   |           |           |           |
|---|-----------|-----------|-----------|
| S | -4.003668 | 1.736277  | -0.104133 |
| O | -4.775880 | 0.451467  | -0.555723 |
| O | -4.903226 | 2.835439  | -0.208249 |
| O | -3.330171 | 1.479537  | 1.162483  |
| O | -2.884165 | 1.924993  | -1.203650 |
| H | -2.081932 | 0.160424  | 1.604185  |
| H | -2.033236 | 1.454803  | -0.927321 |
| S | 0.437844  | 0.296608  | -1.084972 |
| O | -0.641693 | 1.040038  | -0.305486 |
| O | -0.179155 | -0.692225 | -1.980130 |
| O | 1.222382  | 1.316232  | -1.836303 |
| O | 1.314391  | -0.385177 | -0.076574 |
| H | 2.732372  | 1.457268  | -1.453830 |
| H | 1.418290  | -2.068350 | -0.298451 |
| S | -2.569544 | -2.806795 | -0.250152 |
| O | -1.331329 | -2.802910 | 0.606866  |
| O | -3.273264 | -4.053967 | -0.272277 |
| O | -3.360803 | -1.614479 | 0.124636  |
| O | -2.044986 | -2.581209 | -1.742369 |
| H | -4.248088 | -0.385750 | -0.382307 |
| H | -1.461731 | -1.778995 | -1.793801 |
| O | 3.364642  | -0.296699 | 1.788607  |
| O | 6.239580  | -0.464470 | -0.381158 |
| O | 2.903014  | 2.961214  | 0.425094  |
| O | 4.391147  | -1.737409 | -0.334456 |



|            |           |           |           |
|------------|-----------|-----------|-----------|
| O          | 3.649744  | 1.406848  | -1.024750 |
| C          | 4.631318  | 0.053293  | 1.302492  |
| C          | 4.773433  | 1.574187  | 1.034992  |
| C          | 5.030386  | -0.813685 | 0.102427  |
| C          | 3.681165  | 2.069874  | 0.112478  |
| H          | 5.351213  | -0.198643 | 2.089602  |
| H          | 5.748613  | 1.780030  | 0.587007  |
| H          | 4.690781  | 2.111542  | 1.978491  |
| H          | 2.715235  | -0.268508 | 1.058719  |
| H          | 6.427975  | -1.051722 | -1.128326 |
| H          | 1.285196  | 3.470847  | -0.183810 |
| C          | -0.420972 | -0.046536 | 2.834718  |
| N          | -1.674141 | -0.559349 | 2.224122  |
| C          | -2.723442 | -0.963022 | 3.198611  |
| H          | -0.648560 | 0.843545  | 3.421271  |
| H          | 0.276227  | 0.188907  | 2.034406  |
| H          | 0.001620  | -0.813547 | 3.483762  |
| H          | -1.465187 | -1.379282 | 1.609444  |
| H          | -3.000089 | -0.101217 | 3.804336  |
| H          | -2.335550 | -1.762586 | 3.829266  |
| H          | -3.582120 | -1.314361 | 2.632308  |
| C          | 1.484481  | -3.569050 | -1.736395 |
| N          | 1.231883  | -3.097497 | -0.349309 |
| C          | 2.023435  | -3.798334 | 0.693836  |
| H          | 2.541079  | -3.430503 | -1.962539 |
| H          | 0.876868  | -2.970811 | -2.411164 |
| H          | 1.212219  | -4.621339 | -1.816084 |
| H          | 0.217331  | -3.160762 | -0.111980 |
| H          | 3.080383  | -3.619600 | 0.509909  |
| H          | 1.793392  | -4.863354 | 0.665601  |
| H          | 1.753144  | -3.390032 | 1.666355  |
| C          | -0.199023 | 4.381901  | 0.948983  |
| N          | 0.258159  | 3.619567  | -0.240313 |
| C          | -0.117088 | 4.221891  | -1.549368 |
| H          | 0.199496  | 5.395416  | 0.908326  |
| H          | 0.170166  | 3.882267  | 1.843166  |
| H          | -1.288034 | 4.408115  | 0.962503  |
| H          | -0.136328 | 2.645296  | -0.206856 |
| H          | 0.308343  | 5.222668  | -1.624394 |
| H          | -1.203478 | 4.264754  | -1.618370 |
| H          | 0.274999  | 3.576103  | -2.331948 |
| 3SA1MA4DMA |           |           |           |
| S          | 4.823703  | -0.748817 | -0.666743 |
| O          | 5.118946  | 0.754359  | -0.999301 |

|   |           |           |           |
|---|-----------|-----------|-----------|
| O | 5.997308  | -1.490591 | -0.986142 |
| O | 4.265844  | -0.845351 | 0.677767  |
| O | 3.696025  | -1.161485 | -1.684096 |
| H | 2.803142  | -0.030919 | 1.427553  |
| H | 2.773811  | -1.024830 | -1.282733 |
| S | 0.096934  | -0.531891 | -1.009430 |
| O | 1.426971  | -1.106477 | -0.509247 |
| O | 0.367820  | 0.538817  | -1.982337 |
| O | -0.653582 | -1.664512 | -1.637740 |
| O | -0.638133 | -0.023333 | 0.174023  |
| H | -1.949120 | -2.062740 | -0.905941 |
| H | -2.227338 | 1.793028  | 0.316119  |
| S | 2.108736  | 3.123520  | -0.103489 |
| O | 1.039974  | 2.585828  | 0.806367  |
| O | 2.307043  | 4.541285  | -0.003294 |
| O | 3.312653  | 2.285204  | 0.080876  |
| O | 1.570562  | 2.873071  | -1.585338 |
| H | 4.399070  | 1.369415  | -0.666019 |
| H | 1.228914  | 1.942445  | -1.696132 |
| O | -2.239965 | -0.128615 | 2.372214  |
| O | -5.415256 | -0.702198 | 0.785447  |
| O | -1.418662 | -3.388244 | 1.044765  |
| O | -3.860031 | 0.859574  | 0.377245  |
| O | -2.755690 | -2.159632 | -0.286882 |
| C | -3.472263 | -0.763376 | 2.148429  |
| C | -3.343973 | -2.301100 | 1.994088  |
| C | -4.256267 | -0.119286 | 0.994040  |
| C | -2.406713 | -2.684824 | 0.868253  |
| H | -4.079679 | -0.587022 | 3.042984  |
| H | -4.333112 | -2.719692 | 1.793209  |
| H | -2.954946 | -2.724653 | 2.919052  |
| H | -1.697876 | -0.177742 | 1.558746  |
| H | -5.883114 | -0.314826 | -0.052895 |
| H | 0.034253  | -3.747197 | 0.030377  |
| C | 1.315452  | -0.461883 | 2.812619  |
| N | 2.247580  | 0.476289  | 2.138323  |
| C | 3.199191  | 1.164288  | 3.051375  |
| H | 1.893598  | -1.230435 | 3.326322  |
| H | 0.671087  | -0.899681 | 2.056198  |
| H | 0.707607  | 0.086880  | 3.531386  |
| H | 1.707802  | 1.205398  | 1.615335  |
| H | 3.807205  | 0.418672  | 3.562359  |
| H | 2.635740  | 1.753878  | 3.774199  |
| H | 3.827742  | 1.813069  | 2.446847  |

|        |           |           |           |
|--------|-----------|-----------|-----------|
| C      | -1.770144 | 3.081256  | -1.235835 |
| N      | -1.648835 | 2.638877  | 0.180703  |
| C      | -2.043434 | 3.662015  | 1.181095  |
| H      | -2.812005 | 3.323758  | -1.443238 |
| H      | -1.427598 | 2.267367  | -1.871728 |
| H      | -1.134434 | 3.951112  | -1.391722 |
| H      | -0.654173 | 2.383506  | 0.359731  |
| H      | -3.068758 | 3.977863  | 0.990957  |
| H      | -1.361605 | 4.507975  | 1.109916  |
| H      | -1.975580 | 3.214378  | 2.171216  |
| C      | 1.887842  | -4.402990 | 0.702310  |
| N      | 1.017112  | -3.752012 | -0.307275 |
| C      | 1.104126  | -4.332369 | -1.673453 |
| H      | 1.655246  | -5.466548 | 0.758436  |
| H      | 1.703530  | -3.939485 | 1.670029  |
| H      | 2.931448  | -4.262448 | 0.422547  |
| H      | 1.254832  | -2.721120 | -0.371770 |
| H      | 0.802232  | -5.379780 | -1.647378 |
| H      | 2.131441  | -4.247841 | -2.027168 |
| H      | 0.445128  | -3.753942 | -2.317332 |
| C      | -6.764468 | 1.646785  | -1.356111 |
| N      | -6.543025 | 0.195485  | -1.435573 |
| C      | -5.599187 | -0.184827 | -2.500684 |
| H      | -5.835730 | 2.120321  | -1.033485 |
| H      | -7.533787 | 1.857074  | -0.610570 |
| H      | -7.072541 | 2.080777  | -2.316306 |
| H      | -7.431447 | -0.271006 | -1.594537 |
| H      | -4.614378 | 0.215815  | -2.256194 |
| H      | -5.903128 | 0.191949  | -3.485677 |
| H      | -5.518862 | -1.271987 | -2.542720 |
| 3SA2MA |           |           |           |
| S      | -0.501826 | 0.189184  | 2.202607  |
| O      | 0.355336  | 0.211867  | 3.337269  |
| O      | 0.067307  | -0.167580 | 0.908590  |
| O      | -1.782675 | -0.624966 | 2.463078  |
| O      | -1.194004 | 1.648933  | 2.041452  |
| H      | -1.941553 | -1.345904 | 1.750786  |
| H      | -0.534509 | 2.267359  | 1.645730  |
| O      | -1.587211 | -5.162491 | 0.176532  |
| O      | -2.654611 | -2.057271 | -1.232185 |
| O      | 1.195345  | -2.496472 | -1.828478 |
| O      | -2.023743 | -2.572895 | 0.873597  |
| O      | 0.945938  | -3.814681 | -0.025168 |
| C      | -1.798669 | -4.235878 | -0.846596 |

|            |           |           |           |
|------------|-----------|-----------|-----------|
| C          | -0.593844 | -4.093189 | -1.818248 |
| C          | -2.188826 | -2.860481 | -0.303345 |
| C          | 0.606476  | -3.386030 | -1.230739 |
| H          | -2.642569 | -4.602865 | -1.435671 |
| H          | -0.884095 | -3.553212 | -2.718078 |
| H          | -0.293459 | -5.108002 | -2.094091 |
| H          | -0.878978 | -4.825749 | 0.740520  |
| H          | -2.815174 | -1.140950 | -0.893883 |
| H          | 1.728868  | -3.297516 | 0.324792  |
| S          | 0.211563  | 2.742315  | -1.002252 |
| O          | 0.592717  | 2.899462  | 0.408501  |
| O          | -1.017896 | 3.357784  | -1.408216 |
| O          | 1.339562  | 3.277077  | -1.903918 |
| O          | 0.210247  | 1.212909  | -1.333924 |
| H          | 2.231130  | 2.868749  | -1.617713 |
| H          | 0.083277  | 0.659852  | -0.509787 |
| O          | 5.631516  | 0.458792  | -0.931760 |
| O          | 3.137774  | 1.998652  | 1.138013  |
| O          | 3.112185  | -0.965269 | -0.858365 |
| O          | 3.490544  | 2.119264  | -1.085587 |
| O          | 3.008318  | -2.386488 | 0.879569  |
| C          | 4.948841  | 0.740087  | 0.257654  |
| C          | 4.504576  | -0.523590 | 1.026459  |
| C          | 3.782216  | 1.697136  | 0.022254  |
| C          | 3.466630  | -1.390180 | 0.345218  |
| H          | 5.654134  | 1.273939  | 0.903260  |
| H          | 4.107807  | -0.264447 | 2.010487  |
| H          | 5.386988  | -1.146792 | 1.191953  |
| H          | 4.973498  | 0.201906  | -1.589935 |
| H          | 2.327006  | 2.515971  | 0.944088  |
| H          | 2.402334  | -1.558104 | -1.247510 |
| S          | -3.936054 | 1.461890  | -0.316595 |
| O          | -5.286238 | 1.053751  | -0.461720 |
| O          | -2.846732 | 0.498374  | -0.425293 |
| O          | -3.688604 | 2.615737  | -1.357556 |
| O          | -3.756167 | 2.182688  | 1.082009  |
| H          | -2.735844 | 2.861230  | -1.404686 |
| H          | -2.903457 | 1.915657  | 1.492131  |
| 3SA2MA1DMA |           |           |           |
| S          | 0.300172  | 0.210326  | -2.329121 |
| O          | 1.224530  | -0.287968 | -3.291935 |
| O          | 0.973253  | 0.207987  | -0.908929 |
| O          | 0.102327  | 1.742946  | -2.624680 |
| O          | -1.013512 | -0.403394 | -2.210135 |

|   |           |           |           |
|---|-----------|-----------|-----------|
| H | -0.552235 | 2.123993  | -1.982009 |
| H | -1.296085 | -3.186074 | -1.044655 |
| O | -0.199386 | 4.441728  | -1.416360 |
| O | -1.979841 | 3.263321  | 1.440247  |
| O | 1.906607  | 2.652208  | 1.618269  |
| O | -1.547654 | 2.242916  | -0.511437 |
| O | 2.265607  | 3.528531  | -0.424082 |
| C | -0.563854 | 4.421893  | -0.063050 |
| C | 0.624360  | 4.568048  | 0.922286  |
| C | -1.410112 | 3.184730  | 0.267113  |
| C | 1.666707  | 3.482471  | 0.758811  |
| H | -1.228562 | 5.273872  | 0.113862  |
| H | 0.258418  | 4.544593  | 1.946796  |
| H | 1.095246  | 5.533977  | 0.724459  |
| H | 0.706137  | 4.111439  | -1.510471 |
| H | -2.521345 | 2.450063  | 1.639488  |
| H | 2.938876  | 2.780498  | -0.524949 |
| S | -0.575512 | -2.191192 | 1.315078  |
| O | -0.043421 | -3.017179 | 0.187016  |
| O | -1.969600 | -2.512460 | 1.594708  |
| O | 0.211388  | -2.633757 | 2.603036  |
| O | -0.325404 | -0.762662 | 1.081072  |
| H | 1.191614  | -2.572933 | 2.423339  |
| H | 0.391774  | -0.185977 | -0.176486 |
| O | 5.346939  | -1.625625 | 1.690107  |
| O | 2.595553  | -2.771604 | -0.303246 |
| O | 3.348109  | 0.440814  | 1.148350  |
| O | 2.787568  | -2.435917 | 1.918105  |
| O | 3.966776  | 1.565530  | -0.695307 |
| C | 4.655970  | -1.902874 | 0.500355  |
| C | 4.654163  | -0.712090 | -0.480918 |
| C | 3.242760  | -2.403323 | 0.786620  |
| C | 3.960635  | 0.548223  | -0.015943 |
| H | 5.180199  | -2.724188 | -0.000820 |
| H | 4.181206  | -0.992359 | -1.426087 |
| H | 5.688967  | -0.446261 | -0.708377 |
| H | 4.691050  | -1.327781 | 2.333980  |
| H | 1.643315  | -2.968540 | -0.100000 |
| H | 2.845110  | 1.273839  | 1.362997  |
| S | -4.181070 | 0.265902  | 0.982629  |
| O | -5.517272 | 0.630598  | 0.655258  |
| O | -3.416978 | 1.089417  | 1.904428  |
| O | -4.213679 | -1.210293 | 1.491650  |
| O | -3.309107 | 0.100108  | -0.342440 |

|   |           |           |           |
|---|-----------|-----------|-----------|
| H | -3.295086 | -1.589735 | 1.637661  |
| H | -2.631778 | 0.819248  | -0.404032 |
| C | -1.398589 | -3.684083 | -3.060041 |
| N | -1.924271 | -2.988036 | -1.853406 |
| C | -3.336575 | -3.311792 | -1.506512 |
| H | -1.409731 | -4.759652 | -2.888265 |
| H | -0.380451 | -3.343329 | -3.240951 |
| H | -2.023711 | -3.436021 | -3.916817 |
| H | -1.804639 | -1.968838 | -1.995831 |
| H | -3.418236 | -4.381029 | -1.315233 |
| H | -3.980988 | -3.028096 | -2.337549 |
| H | -3.611834 | -2.754233 | -0.615472 |

### 3SA2MA2DMA

|   |           |           |           |
|---|-----------|-----------|-----------|
| S | 0.414846  | 0.486378  | -2.026405 |
| O | -0.520737 | 0.088510  | -3.052292 |
| O | 0.291045  | -0.223151 | -0.739073 |
| O | 1.856803  | 0.159069  | -2.586120 |
| O | 0.372773  | 1.972122  | -1.803334 |
| H | 2.519076  | 0.127055  | -1.852846 |
| H | -1.126103 | 2.657273  | -2.137754 |
| O | 5.569021  | -2.158895 | -0.475878 |
| O | 3.749746  | 0.160941  | 1.535569  |
| O | 1.711910  | -3.211278 | 1.230763  |
| O | 3.745833  | -0.138322 | -0.699940 |
| O | 2.948075  | -3.308862 | -0.643577 |
| C | 4.937757  | -1.704568 | 0.686956  |
| C | 4.071643  | -2.792758 | 1.383250  |
| C | 4.086230  | -0.459568 | 0.422746  |
| C | 2.790426  | -3.126589 | 0.654207  |
| H | 5.726898  | -1.425527 | 1.388672  |
| H | 3.805927  | -2.484949 | 2.393490  |
| H | 4.684352  | -3.697415 | 1.435181  |
| H | 4.889709  | -2.249529 | -1.156559 |
| H | 3.132938  | 0.919289  | 1.360837  |
| H | 2.064712  | -3.461837 | -1.097267 |
| S | -2.156701 | 1.722745  | 1.148744  |
| O | -3.005245 | 1.391999  | -0.032058 |
| O | -1.453781 | 2.982659  | 0.900825  |
| O | -2.877667 | 1.644413  | 2.415023  |
| O | -1.097046 | 0.547747  | 1.289286  |
| H | -2.763191 | 0.030345  | 3.033888  |
| H | -0.543037 | 0.366712  | 0.459977  |
| O | -3.187787 | -4.530241 | -0.593486 |
| O | -3.292128 | -0.996811 | -1.141961 |

|            |           |           |           |
|------------|-----------|-----------|-----------|
| O          | -0.625456 | -3.318844 | 0.005787  |
| O          | -3.358259 | -2.185152 | 0.771995  |
| O          | 0.621625  | -3.623146 | -1.836307 |
| C          | -3.047078 | -3.339472 | -1.327341 |
| C          | -1.722805 | -3.263992 | -2.116224 |
| C          | -3.248210 | -2.109625 | -0.441557 |
| C          | -0.459464 | -3.425384 | -1.304664 |
| H          | -3.858442 | -3.324702 | -2.061109 |
| H          | -1.631326 | -2.301450 | -2.630635 |
| H          | -1.714442 | -4.042694 | -2.880854 |
| H          | -2.663373 | -4.421019 | 0.209369  |
| H          | -3.275443 | -0.176997 | -0.578783 |
| H          | 0.264317  | -3.325165 | 0.467979  |
| S          | 2.043298  | 3.539120  | 0.956310  |
| O          | 3.178322  | 4.293105  | 1.363226  |
| O          | 1.959883  | 2.112717  | 1.235321  |
| O          | 0.777841  | 4.225345  | 1.597220  |
| O          | 1.850133  | 3.736324  | -0.591669 |
| H          | -0.042120 | 3.686861  | 1.432068  |
| H          | 1.350233  | 2.969813  | -1.006801 |
| C          | -2.196714 | 4.440984  | -1.965111 |
| N          | -2.124750 | 2.974802  | -2.204331 |
| C          | -2.693208 | 2.516256  | -3.501138 |
| H          | -1.629056 | 4.956966  | -2.738821 |
| H          | -1.770884 | 4.644566  | -0.985187 |
| H          | -3.238180 | 4.761031  | -1.992418 |
| H          | -2.586650 | 2.471703  | -1.421518 |
| H          | -2.183690 | 3.033575  | -4.313455 |
| H          | -3.759695 | 2.739505  | -3.528059 |
| H          | -2.514831 | 1.446387  | -3.587953 |
| C          | -1.503984 | -1.484803 | 3.740454  |
| N          | -2.805158 | -0.999463 | 3.203296  |
| C          | -3.983751 | -1.305498 | 4.054858  |
| H          | -1.320160 | -1.018233 | 4.707794  |
| H          | -0.721750 | -1.205992 | 3.039013  |
| H          | -1.544424 | -2.568090 | 3.849570  |
| H          | -2.961502 | -1.408422 | 2.259236  |
| H          | -3.851532 | -0.846304 | 5.034013  |
| H          | -4.083760 | -2.385284 | 4.159103  |
| H          | -4.872609 | -0.898601 | 3.575515  |
| 3SA2MA3DMA |           |           |           |
| S          | 0.048475  | 0.488881  | 1.453822  |
| O          | -0.133548 | 1.838505  | 1.946185  |
| O          | -0.263421 | 0.310188  | 0.023912  |

|   |           |           |           |
|---|-----------|-----------|-----------|
| O | 1.602269  | 0.221511  | 1.640963  |
| O | -0.686645 | -0.531413 | 2.255706  |
| H | 1.864136  | -0.725523 | 1.569585  |
| H | -2.032228 | 0.475860  | 3.025061  |
| O | 5.835953  | -1.913565 | 2.069972  |
| O | 3.394470  | -3.263596 | -0.139328 |
| O | 4.082889  | 0.123962  | -1.163211 |
| O | 3.186605  | -1.900247 | 1.644883  |
| O | 5.256534  | 0.750400  | 0.646459  |
| C | 5.376876  | -2.338225 | 0.817315  |
| C | 5.773868  | -1.355417 | -0.330518 |
| C | 3.858845  | -2.504246 | 0.825360  |
| C | 4.961602  | -0.081767 | -0.328400 |
| H | 5.845267  | -3.299461 | 0.595379  |
| H | 5.628398  | -1.840220 | -1.295271 |
| H | 6.828965  | -1.118619 | -0.183805 |
| H | 5.157118  | -1.329940 | 2.436613  |
| H | 2.397384  | -3.199185 | -0.179567 |
| H | 4.655538  | 1.551561  | 0.620365  |
| S | -3.926089 | 0.889934  | -0.191216 |
| O | -3.311478 | 1.996700  | 0.589473  |
| O | -4.300473 | -0.218818 | 0.718531  |
| O | -4.934553 | 1.264578  | -1.144304 |
| O | -2.716769 | 0.295497  | -1.089725 |
| H | -0.518068 | -1.007438 | -2.155291 |
| H | -1.874775 | 0.292316  | -0.562845 |
| O | 1.408398  | 4.486224  | -2.441943 |
| O | -1.301073 | 3.735012  | -0.266634 |
| O | 2.395270  | 2.165584  | -1.162418 |
| O | -0.543266 | 2.576168  | -2.052133 |
| O | 3.644333  | 2.889638  | 0.551234  |
| C | 0.744427  | 4.441177  | -1.201637 |
| C | 1.693769  | 4.152290  | -0.012936 |
| C | -0.437502 | 3.466499  | -1.232773 |
| C | 2.674633  | 3.013070  | -0.180439 |
| H | 0.321279  | 5.434450  | -1.036108 |
| H | 1.114972  | 3.927168  | 0.888821  |
| H | 2.291505  | 5.040637  | 0.199230  |
| H | 1.562180  | 3.568107  | -2.696691 |
| H | -2.005606 | 3.052492  | -0.167573 |
| H | 3.057099  | 1.415136  | -1.156648 |
| S | -0.503242 | -3.229285 | -0.464827 |
| O | -0.641522 | -4.652575 | -0.611778 |
| O | 0.859252  | -2.685425 | -0.386640 |



|   |           |           |           |
|---|-----------|-----------|-----------|
| O | -1.291826 | -2.452837 | -1.476921 |
| O | -1.219574 | -2.899244 | 0.945909  |
| H | -2.959922 | -2.483798 | -1.072460 |
| H | -0.937442 | -2.030097 | 1.326619  |
| C | -3.970312 | 0.398569  | 3.784346  |
| N | -2.810062 | 1.138794  | 3.218485  |
| C | -2.318062 | 2.249936  | 4.079807  |
| H | -3.671947 | -0.069087 | 4.722472  |
| H | -4.284895 | -0.343706 | 3.056150  |
| H | -4.784649 | 1.100547  | 3.961912  |
| H | -3.058701 | 1.514667  | 2.274925  |
| H | -2.029391 | 1.845772  | 5.049919  |
| H | -3.117578 | 2.979855  | 4.204311  |
| H | -1.456982 | 2.695795  | 3.589976  |
| C | 1.309058  | -0.608325 | -3.038926 |
| N | -0.090336 | -0.228706 | -2.703244 |
| C | -0.949115 | 0.071139  | -3.879905 |
| H | 1.289687  | -1.500111 | -3.664294 |
| H | 1.843648  | -0.820131 | -2.117434 |
| H | 1.784707  | 0.214332  | -3.570796 |
| H | -0.082990 | 0.596711  | -2.087061 |
| H | -1.011875 | -0.818292 | -4.506358 |
| H | -0.512682 | 0.899612  | -4.434743 |
| H | -1.932625 | 0.355773  | -3.513631 |
| C | -4.837383 | -2.323208 | -1.955665 |
| N | -3.963223 | -2.539816 | -0.772650 |
| C | -4.189670 | -3.830693 | -0.068736 |
| H | -4.636443 | -3.097689 | -2.695558 |
| H | -4.624954 | -1.338940 | -2.367552 |
| H | -5.880788 | -2.364624 | -1.644661 |
| H | -4.100606 | -1.740239 | -0.115085 |
| H | -3.976287 | -4.652680 | -0.750820 |
| H | -5.225543 | -3.878461 | 0.267305  |
| H | -3.506679 | -3.881702 | 0.776128  |

3SA2MA4DMA

|   |           |          |           |
|---|-----------|----------|-----------|
| S | 0.072904  | 1.602209 | -1.475773 |
| O | 0.872345  | 0.535758 | -2.042611 |
| O | -0.347227 | 1.052962 | 0.073024  |
| O | 0.736481  | 2.845585 | -1.142759 |
| O | -1.230221 | 1.799964 | -2.136682 |
| H | -1.100938 | 3.259524 | 1.136071  |
| H | -2.533697 | 0.805134 | -2.511236 |
| O | 3.111146  | 4.728148 | 1.612246  |
| O | 1.615815  | 1.730424 | 1.687638  |

|   |           |           |           |
|---|-----------|-----------|-----------|
| O | 4.553435  | 0.677684  | 1.337402  |
| O | 0.455976  | 3.613597  | 2.084951  |
| O | 4.213579  | 2.557349  | 0.159838  |
| C | 2.839577  | 3.644002  | 2.476085  |
| C | 4.012988  | 2.649859  | 2.550795  |
| C | 1.501184  | 2.992863  | 2.071181  |
| C | 4.265244  | 1.957619  | 1.230675  |
| H | 2.684762  | 4.081102  | 3.465701  |
| H | 3.851471  | 1.898257  | 3.323891  |
| H | 4.909072  | 3.222199  | 2.809595  |
| H | 3.355861  | 4.345937  | 0.755477  |
| H | 0.812364  | 1.440298  | 1.164769  |
| H | 4.092978  | 1.818007  | -1.404558 |
| S | -1.652393 | -2.549959 | -0.284205 |
| O | -1.484714 | -2.206859 | -1.700979 |
| O | -3.177365 | -2.925674 | -0.046348 |
| O | -0.919127 | -3.727241 | 0.153552  |
| O | -1.386647 | -1.360281 | 0.585993  |
| H | 0.772600  | -3.337581 | 0.832162  |
| H | -0.676710 | 0.120775  | 0.053036  |
| O | 4.346865  | -2.878737 | -2.421165 |
| O | 0.894596  | -2.332354 | -3.064968 |
| O | 4.256137  | -0.488288 | -1.018500 |
| O | 1.915540  | -2.685306 | -1.092353 |
| O | 3.924867  | 1.345933  | -2.262076 |
| C | 3.264498  | -2.236105 | -3.053110 |
| C | 3.520876  | -0.733489 | -3.306738 |
| C | 1.953960  | -2.444209 | -2.282180 |
| C | 3.922561  | 0.049128  | -2.078933 |
| H | 3.135425  | -2.715680 | -4.025555 |
| H | 2.640045  | -0.250312 | -3.732276 |
| H | 4.338014  | -0.633269 | -4.028882 |
| H | 4.495451  | -2.389446 | -1.599540 |
| H | 0.066091  | -2.334381 | -2.523005 |
| H | 4.566796  | 0.261903  | 0.428224  |
| S | -4.468870 | 0.492774  | 0.609563  |
| O | -5.712218 | 0.671779  | 1.301767  |
| O | -3.919113 | 1.706862  | -0.029208 |
| O | -3.403686 | 0.052968  | 1.739613  |
| O | -4.448888 | -0.623020 | -0.393018 |
| H | -2.665152 | -0.455230 | 1.322861  |
| H | -3.743516 | -2.110905 | -0.156378 |
| C | 2.535990  | -4.236244 | 1.434971  |
| N | 1.409073  | -3.291525 | 1.648605  |

|        |           |           |           |
|--------|-----------|-----------|-----------|
| C      | 1.831793  | -1.879428 | 1.858433  |
| H      | 3.072393  | -3.936972 | 0.537726  |
| H      | 2.129611  | -5.238163 | 1.299047  |
| H      | 3.192179  | -4.217671 | 2.305872  |
| H      | 0.822309  | -3.611324 | 2.467837  |
| H      | 2.377724  | -1.541563 | 0.981844  |
| H      | 2.459842  | -1.820025 | 2.747461  |
| H      | 0.936456  | -1.275150 | 1.986137  |
| C      | -2.817896 | 3.899719  | 2.070420  |
| N      | -2.061342 | 3.513319  | 0.850129  |
| C      | -1.972373 | 4.580701  | -0.184573 |
| H      | -2.314962 | 4.737609  | 2.550811  |
| H      | -2.845594 | 3.043426  | 2.741942  |
| H      | -3.834703 | 4.165896  | 1.787365  |
| H      | -2.533448 | 2.679323  | 0.443982  |
| H      | -1.468057 | 5.444856  | 0.246105  |
| H      | -2.980356 | 4.845730  | -0.501849 |
| H      | -1.394146 | 4.191934  | -1.019144 |
| C      | -4.328396 | 1.545008  | -3.206654 |
| N      | -3.459139 | 0.409231  | -2.801744 |
| C      | -3.260685 | -0.616299 | -3.859410 |
| H      | -3.861491 | 2.070737  | -4.038987 |
| H      | -4.434562 | 2.203341  | -2.348333 |
| H      | -5.304455 | 1.161899  | -3.504940 |
| H      | -3.858657 | -0.028329 | -1.943870 |
| H      | -2.756476 | -0.156369 | -4.709091 |
| H      | -4.231771 | -1.003459 | -4.169030 |
| H      | -2.650540 | -1.416154 | -3.446783 |
| C      | 0.130991  | -3.791878 | 5.176872  |
| N      | -0.270428 | -4.200029 | 3.823786  |
| C      | -1.653232 | -3.799416 | 3.499387  |
| H      | 0.147151  | -2.700716 | 5.234894  |
| H      | 1.135691  | -4.161073 | 5.395535  |
| H      | -0.553078 | -4.159097 | 5.954840  |
| H      | -0.215891 | -5.213646 | 3.765734  |
| H      | -1.718908 | -2.709751 | 3.477262  |
| H      | -2.378947 | -4.173101 | 4.234315  |
| H      | -1.914716 | -4.166914 | 2.507973  |
| 3SA3MA |           |           |           |
| S      | -1.375151 | 0.695402  | 1.764449  |
| O      | -1.040454 | 2.023833  | 2.214090  |
| O      | -2.721909 | 0.215584  | 1.946679  |
| O      | -1.021052 | 0.514422  | 0.258951  |
| O      | -0.376292 | -0.262283 | 2.517957  |

|   |           |           |           |
|---|-----------|-----------|-----------|
| H | -0.336794 | 1.197173  | -0.055322 |
| H | -0.420305 | -1.177362 | 2.149982  |
| O | 1.487318  | 4.178644  | -2.459445 |
| O | 0.259163  | 3.991932  | 0.853973  |
| O | 3.836034  | 2.831218  | -1.676019 |
| O | 0.623339  | 2.313107  | -0.608795 |
| O | 4.424349  | 3.108927  | 0.474523  |
| C | 1.505429  | 4.502752  | -1.100000 |
| C | 2.933302  | 4.705514  | -0.522766 |
| C | 0.737107  | 3.481041  | -0.260052 |
| C | 3.802476  | 3.468712  | -0.514386 |
| H | 0.981351  | 5.454652  | -0.996401 |
| H | 2.885990  | 5.086221  | 0.497022  |
| H | 3.422742  | 5.451986  | -1.155205 |
| H | 1.969414  | 3.350048  | -2.576186 |
| H | -0.211526 | 3.307190  | 1.387984  |
| H | 4.429182  | 2.029818  | -1.620235 |
| S | 0.938844  | -3.018946 | 0.600855  |
| O | -0.302610 | -2.748732 | 1.327225  |
| O | 1.938153  | -3.830140 | 1.246302  |
| O | 0.578908  | -3.699657 | -0.741670 |
| O | 1.526239  | -1.632011 | 0.241680  |
| H | -0.351854 | -3.441346 | -1.080769 |
| H | 2.552120  | -1.645755 | 0.213208  |
| O | 6.591404  | -1.680730 | -1.656303 |
| O | 5.938662  | 0.944974  | 0.690358  |
| O | 4.680510  | -3.465213 | 1.285346  |
| O | 5.437439  | 0.704437  | -1.493676 |
| O | 4.061951  | -1.577291 | 0.231945  |
| C | 6.749924  | -0.991867 | -0.440949 |
| C | 6.379741  | -1.915921 | 0.722767  |
| C | 5.952614  | 0.309270  | -0.454306 |
| C | 4.925073  | -2.308401 | 0.710737  |
| H | 7.800523  | -0.694460 | -0.303395 |
| H | 6.575964  | -1.420121 | 1.678827  |
| H | 6.993925  | -2.816013 | 0.684224  |
| H | 6.118179  | -1.083181 | -2.253213 |
| H | 5.390845  | 1.781519  | 0.621415  |
| H | 3.714146  | -3.655540 | 1.289534  |
| O | -4.117552 | -3.286130 | -2.894800 |
| O | -2.822526 | -3.491178 | 0.440313  |
| O | -3.941327 | -0.901393 | -0.972713 |
| O | -1.800585 | -3.253165 | -1.555025 |
| O | -6.149852 | -0.629160 | -0.622884 |

|            |           |           |           |
|------------|-----------|-----------|-----------|
| C          | -4.164798 | -3.605924 | -1.527588 |
| C          | -5.305558 | -2.846354 | -0.848012 |
| C          | -2.807989 | -3.405097 | -0.870639 |
| C          | -5.176612 | -1.339017 | -0.819509 |
| H          | -4.372147 | -4.681644 | -1.398899 |
| H          | -5.409988 | -3.175535 | 0.190051  |
| H          | -6.240947 | -3.084619 | -1.355512 |
| H          | -3.190516 | -3.146045 | -3.129218 |
| H          | -1.931719 | -3.307491 | 0.816025  |
| H          | -3.889917 | 0.085610  | -0.872993 |
| S          | -4.925608 | 2.492188  | 0.183774  |
| O          | -3.900916 | 1.773822  | -0.564501 |
| O          | -4.957281 | 3.911966  | 0.159525  |
| O          | -6.336757 | 1.975902  | -0.254345 |
| O          | -4.829197 | 1.995749  | 1.691882  |
| H          | -6.304112 | 0.985257  | -0.403217 |
| H          | -4.089445 | 1.353616  | 1.790686  |
| 3SA3MA1DMA |           |           |           |
| S          | 4.124235  | -2.172390 | -0.791205 |
| O          | 3.954456  | -3.591621 | -0.945907 |
| O          | 5.349186  | -1.673791 | -0.199906 |
| O          | 3.984500  | -1.409887 | -2.144778 |
| O          | 2.894007  | -1.692540 | 0.058451  |
| H          | 3.029286  | -1.323433 | -2.474340 |
| H          | 2.993457  | -0.710014 | 0.260367  |
| O          | 2.432858  | 3.496170  | -0.795871 |
| O          | 2.095366  | 2.476126  | 2.617637  |
| O          | 5.477032  | 0.998311  | 0.420203  |
| O          | 0.535694  | 2.752517  | 1.018679  |
| O          | 3.234003  | 0.809474  | 0.461137  |
| C          | 2.778069  | 3.510293  | 0.566350  |
| C          | 4.186255  | 2.952761  | 0.827366  |
| C          | 1.686418  | 2.851785  | 1.418936  |
| C          | 4.262194  | 1.474264  | 0.546623  |
| H          | 2.784693  | 4.564131  | 0.869712  |
| H          | 4.485541  | 3.111078  | 1.867639  |
| H          | 4.905081  | 3.477939  | 0.196419  |
| H          | 2.208276  | 2.587757  | -1.064486 |
| H          | 1.395940  | 1.950334  | 3.070629  |
| H          | 5.468043  | 0.025735  | 0.215578  |
| S          | -1.228975 | 1.637170  | 3.760095  |
| O          | -1.196170 | 2.625422  | 4.781186  |
| O          | -0.003049 | 0.849583  | 3.527624  |
| O          | -2.411547 | 0.666902  | 4.039237  |

|   |           |           |           |
|---|-----------|-----------|-----------|
| O | -1.634947 | 2.236448  | 2.364785  |
| H | -2.416209 | -0.066866 | 3.352143  |
| H | -0.800383 | 2.401124  | 1.822052  |
| O | -2.775592 | -3.905746 | 1.725228  |
| O | -0.156808 | -1.730309 | 2.380880  |
| O | 1.779854  | -4.603874 | 0.568991  |
| O | -2.326001 | -1.209711 | 2.221435  |
| O | 0.493232  | -3.250973 | -0.666841 |
| C | -1.610025 | -3.289551 | 1.235534  |
| C | -0.438350 | -4.270038 | 1.310660  |
| C | -1.385214 | -1.977735 | 1.996307  |
| C | 0.652346  | -3.967765 | 0.306256  |
| H | -1.730419 | -2.992727 | 0.185287  |
| H | -0.840996 | -5.257752 | 1.067784  |
| H | -0.008711 | -4.339913 | 2.309943  |
| H | -3.525543 | -3.548341 | 1.220237  |
| H | -0.080424 | -0.839727 | 2.802711  |
| H | 2.475412  | -4.336804 | -0.073189 |
| S | 0.621076  | -0.040898 | -2.457502 |
| O | -0.545050 | 0.153609  | -3.332260 |
| O | 1.591010  | -0.993482 | -2.996141 |
| O | 1.192265  | 1.257237  | -2.060931 |
| O | 0.061350  | -0.662727 | -1.093589 |
| H | -0.010753 | 2.507828  | -2.234810 |
| H | 0.257904  | -1.631740 | -1.037179 |
| O | -5.761779 | 1.374267  | -1.228217 |
| O | -3.080557 | -0.363704 | -2.845817 |
| O | -4.219905 | -0.481607 | 0.356214  |
| O | -3.191724 | 1.750912  | -2.072239 |
| O | -4.515715 | -2.664175 | -0.095756 |
| C | -5.192139 | 0.398182  | -2.061675 |
| C | -5.467030 | -1.043595 | -1.592538 |
| C | -3.702478 | 0.671187  | -2.319106 |
| C | -4.691758 | -1.498124 | -0.377274 |
| H | -5.682673 | 0.515124  | -3.034690 |
| H | -5.260625 | -1.764036 | -2.383981 |
| H | -6.531906 | -1.116408 | -1.351252 |
| H | -5.248184 | 1.389828  | -0.411400 |
| H | -2.110620 | -0.175729 | -3.006667 |
| H | -3.657683 | -0.826516 | 1.087436  |
| C | -0.807393 | 4.357769  | -1.672080 |
| N | -0.805323 | 3.126376  | -2.506724 |
| C | -0.711171 | 3.372251  | -3.971777 |
| H | 0.124229  | 4.896118  | -1.837469 |

H -0.864035 4.064807 -0.626856  
H -1.664505 4.972563 -1.945186  
H -1.664758 2.568547 -2.321693  
H 0.210438 3.913140 -4.183217  
H -1.571718 3.958100 -4.293664  
H -0.698339 2.406338 -4.471984

3SA3MA2DMA

S 4.160487 0.752353 -2.198021  
O 3.955915 0.967026 -3.605877  
O 5.294080 -0.046272 -1.780579  
O 4.283447 2.094278 -1.413326  
O 2.830416 0.110677 -1.664864  
H 3.399971 2.567365 -1.260661  
H 2.961053 -0.163919 -0.702980  
O 2.469330 0.284224 3.346696  
O 2.234576 -3.002580 2.092392  
O 5.482642 -1.042013 0.773713  
O 0.580547 -1.689055 2.869512  
O 3.293717 -0.531091 0.766829  
C 2.853954 -1.079581 3.384112  
C 4.254381 -1.304054 2.797191  
C 1.763323 -1.960177 2.742828  
C 4.305142 -0.928193 1.339066  
H 2.881569 -1.353164 4.443424  
H 4.568956 -2.344992 2.899564  
H 4.980010 -0.689746 3.336881  
H 2.375313 0.532425 2.412027  
H 1.505826 -3.424103 1.547797  
H 5.453813 -0.720882 -0.165038  
S -0.939009 -4.343394 1.121108  
O -0.587012 -5.408138 2.015484  
O 0.265473 -3.696878 0.488865  
O -1.956688 -4.661993 0.111276  
O -1.614626 -3.140781 1.959180  
H -2.910776 -3.703159 -0.735899  
H -0.881678 -2.589960 2.325224  
O -2.798815 -1.083379 -2.950824  
O -0.112274 -2.111170 -1.548892  
O 1.668611 -0.371731 -4.544429  
O -1.530899 -0.854261 -0.349859  
O 0.641205 1.212652 -3.348740  
C -1.485544 -0.536793 -2.727755  
C -0.591862 -0.773015 -3.938507  
C -1.002491 -1.165855 -1.412512

|   |           |           |           |
|---|-----------|-----------|-----------|
| C | 0.630165  | 0.125678  | -3.899033 |
| H | -1.571485 | 0.537357  | -2.559426 |
| H | -1.165257 | -0.513202 | -4.834070 |
| H | -0.283986 | -1.813503 | -4.026675 |
| H | -3.428639 | -0.413052 | -2.607227 |
| H | 0.043081  | -2.644635 | -0.699945 |
| H | 2.452303  | 0.203012  | -4.384150 |
| S | 0.949409  | 2.915005  | -0.058038 |
| O | 0.260664  | 3.992903  | 0.669224  |
| O | 2.107626  | 3.357006  | -0.835841 |
| O | 1.235433  | 1.773407  | 0.828352  |
| O | -0.158127 | 2.434167  | -1.111219 |
| H | 0.242701  | 1.914697  | 2.276154  |
| H | 0.249742  | 2.042340  | -1.920878 |
| O | -5.146134 | 2.838886  | 1.764662  |
| O | -2.304279 | 4.356978  | 0.212502  |
| O | -3.043911 | 1.290337  | 0.097841  |
| O | -2.618828 | 3.460308  | 2.260532  |
| O | -4.280293 | 0.834701  | -1.723790 |
| C | -4.482051 | 3.581912  | 0.769158  |
| C | -4.651824 | 2.909529  | -0.597023 |
| C | -3.017188 | 3.791518  | 1.150241  |
| C | -3.983348 | 1.563805  | -0.786804 |
| H | -4.923255 | 4.587273  | 0.691999  |
| H | -4.247607 | 3.559753  | -1.378912 |
| H | -5.715185 | 2.781473  | -0.805605 |
| H | -4.516271 | 2.754107  | 2.494839  |
| H | -1.320513 | 4.316263  | 0.408600  |
| H | -2.521978 | 0.468662  | -0.132073 |
| C | -0.880302 | 1.057013  | 3.818107  |
| N | -0.266729 | 2.227110  | 3.130780  |
| C | 0.687526  | 3.008942  | 3.964663  |
| H | -0.105500 | 0.324068  | 4.026638  |
| H | -1.619236 | 0.619323  | 3.149339  |
| H | -1.365776 | 1.398940  | 4.732051  |
| H | -1.023375 | 2.846720  | 2.789446  |
| H | 1.506894  | 2.354903  | 4.257573  |
| H | 0.166164  | 3.388693  | 4.843243  |
| H | 1.057731  | 3.835897  | 3.361607  |
| C | -4.451369 | -4.227750 | -2.025805 |
| N | -3.709834 | -3.214454 | -1.230581 |
| C | -4.523439 | -2.533717 | -0.184751 |
| H | -4.803633 | -5.011634 | -1.357052 |
| H | -3.773545 | -4.658120 | -2.761268 |



H -5.294076 -3.754922 -2.529908  
H -3.314973 -2.500375 -1.872162  
H -4.943628 -3.289506 0.476943  
H -5.315298 -1.952555 -0.656025  
H -3.862517 -1.885085 0.384813

3SA3MA3DMA

S -0.093816 1.770080 -0.610057  
O -1.122365 0.752851 -0.807302  
O 0.362060 2.396401 -1.867160  
O -0.453907 2.782134 0.399243  
O 1.147358 0.951901 -0.029741  
H -1.505946 3.942131 -0.177179  
H 1.992639 1.414077 -0.282928  
O 5.658821 4.223430 0.175942  
O 6.328098 0.917295 -1.005474  
O 2.745386 3.365711 -2.460975  
O 5.893898 1.736225 1.054831  
O 3.421900 2.133121 -0.710497  
C 6.019625 3.259413 -0.786460  
C 5.066075 3.325803 -1.984323  
C 6.062180 1.868932 -0.153776  
C 3.658648 2.890761 -1.645485  
H 7.034910 3.460646 -1.156620  
H 5.423464 2.670956 -2.785178  
H 5.044495 4.343191 -2.377095  
H 5.585006 3.741442 1.012277  
H 6.239308 -0.000989 -0.600905  
H 1.843075 2.995303 -2.229578  
S 6.476974 -2.423857 0.746638  
O 7.876068 -2.127996 0.826119  
O 5.702702 -1.416181 -0.084210  
O 6.343043 -3.792971 -0.047367  
O 5.757655 -2.588496 2.025092  
H 5.391221 -3.947006 -0.268751  
H 5.059845 -1.151620 2.457923  
O 1.158700 -4.768568 -0.973818  
O 3.145122 -1.854616 -0.337729  
O -1.604330 -2.619487 -2.392002  
O 3.674596 -4.021065 -0.639944  
O -1.433877 -3.006550 -0.184930  
C 1.361965 -3.440195 -0.545267  
C 0.553147 -2.486376 -1.425232  
C 2.851494 -3.121882 -0.526290  
C -0.927696 -2.737149 -1.269608

|   |           |           |           |
|---|-----------|-----------|-----------|
| H | 1.013402  | -3.317450 | 0.491704  |
| H | 0.830756  | -2.603874 | -2.473250 |
| H | 0.734402  | -1.449814 | -1.126456 |
| H | 2.019569  | -5.207101 | -0.923948 |
| H | 4.143923  | -1.713617 | -0.295992 |
| H | -2.571429 | -2.773663 | -2.231359 |
| S | -4.529660 | 1.919722  | -0.225836 |
| O | -4.128755 | 2.772905  | -1.345346 |
| O | -5.915425 | 1.428194  | -0.284138 |
| O | -3.686860 | 0.578733  | -0.281536 |
| O | -4.253647 | 2.567852  | 1.080309  |
| H | -2.713377 | 0.733109  | -0.460177 |
| H | -5.307628 | 1.822553  | 2.171663  |
| O | -6.835557 | -3.760240 | -1.806192 |
| O | -3.916515 | -3.658937 | 0.270825  |
| O | -6.364610 | -1.169100 | -0.526258 |
| O | -4.222636 | -3.187491 | -1.911502 |
| O | -6.666270 | -1.123797 | 1.702436  |
| C | -6.099429 | -3.947242 | -0.626158 |
| C | -6.734830 | -3.236239 | 0.586189  |
| C | -4.636101 | -3.554018 | -0.821557 |
| C | -6.581562 | -1.732191 | 0.639588  |
| H | -6.095877 | -5.019874 | -0.392624 |
| H | -6.333421 | -3.629885 | 1.520396  |
| H | -7.806625 | -3.457327 | 0.568477  |
| H | -6.323911 | -3.156698 | -2.361727 |
| H | -2.958177 | -3.391801 | 0.093608  |
| H | -6.203110 | -0.184952 | -0.446428 |
| C | 3.273721  | -0.061665 | 2.673330  |
| N | 4.756632  | -0.177113 | 2.726198  |
| C | 5.357274  | 0.144995  | 4.045960  |
| H | 2.838913  | -0.725361 | 3.420529  |
| H | 2.928870  | -0.350531 | 1.682732  |
| H | 2.981611  | 0.968412  | 2.874295  |
| H | 5.177829  | 0.452939  | 2.013366  |
| H | 4.965862  | -0.541804 | 4.795774  |
| H | 5.114412  | 1.172366  | 4.316220  |
| H | 6.437000  | 0.026252  | 3.972324  |
| C | -2.763044 | 5.525963  | 0.347599  |
| N | -2.195811 | 4.582615  | -0.647838 |
| C | -1.535626 | 5.218152  | -1.818186 |
| H | -1.960596 | 6.126118  | 0.776599  |
| H | -3.254938 | 4.937136  | 1.119519  |
| H | -3.489632 | 6.174626  | -0.142236 |

|   |           |          |           |
|---|-----------|----------|-----------|
| H | -2.957669 | 3.943963 | -0.975610 |
| H | -0.735060 | 5.869962 | -1.468415 |
| H | -2.269783 | 5.796330 | -2.379099 |
| H | -1.113386 | 4.429988 | -2.438875 |
| C | -5.595151 | 1.019968 | 4.084233  |
| N | -6.066463 | 1.337631 | 2.714168  |
| C | -7.291753 | 2.175215 | 2.650007  |
| H | -5.376424 | 1.944129 | 4.619360  |
| H | -4.691605 | 0.416830 | 4.009130  |
| H | -6.365055 | 0.457151 | 4.611275  |
| H | -6.259086 | 0.441892 | 2.206387  |
| H | -7.105758 | 3.129025 | 3.143597  |
| H | -8.113378 | 1.654308 | 3.141396  |
| H | -7.523973 | 2.337949 | 1.599489  |

### 3SA3MA4DMA

|   |           |           |           |
|---|-----------|-----------|-----------|
| S | 3.751151  | 2.140121  | 0.008371  |
| O | 4.907129  | 1.574072  | 0.626184  |
| O | 3.623942  | 3.584969  | -0.080121 |
| O | 3.648297  | 1.521494  | -1.424596 |
| O | 2.480868  | 1.593628  | 0.770519  |
| H | 2.783738  | 1.808373  | -1.894309 |
| H | 1.682899  | 2.190212  | 0.631619  |
| O | -2.203373 | 3.999801  | -1.503909 |
| O | -2.399131 | 3.488515  | 2.045513  |
| O | 1.393059  | 5.101426  | -0.022364 |
| O | -2.929376 | 2.108677  | 0.354091  |
| O | 0.374113  | 3.158555  | 0.480192  |
| C | -2.198239 | 4.363523  | -0.151348 |
| C | -0.946460 | 5.154297  | 0.264230  |
| C | -2.520998 | 3.186438  | 0.774793  |
| C | 0.338709  | 4.360649  | 0.241515  |
| H | -3.045409 | 5.048300  | -0.019927 |
| H | -1.069173 | 5.525722  | 1.286350  |
| H | -0.839972 | 6.016737  | -0.393740 |
| H | -1.557427 | 3.285842  | -1.671528 |
| H | -2.561556 | 2.681333  | 2.620272  |
| H | 2.220083  | 4.554896  | -0.031822 |
| S | -3.755513 | 0.338602  | 3.433364  |
| O | -4.864348 | 0.913965  | 4.136025  |
| O | -2.550680 | 1.241206  | 3.366389  |
| O | -3.363914 | -1.007022 | 3.875697  |
| O | -4.177410 | 0.164291  | 1.882867  |
| H | -2.342865 | -2.182990 | 3.383705  |
| H | -3.658582 | 0.810592  | 1.349584  |

|   |           |           |           |
|---|-----------|-----------|-----------|
| O | 0.582955  | -2.900586 | 1.864484  |
| O | -0.226724 | 0.236893  | 2.743889  |
| O | 4.463119  | -1.525079 | 2.765518  |
| O | -1.327094 | -0.982839 | 1.228021  |
| O | 3.604452  | -1.959430 | 0.733834  |
| C | 0.968641  | -1.529461 | 1.628868  |
| C | 2.153787  | -1.171555 | 2.502136  |
| C | -0.296355 | -0.698150 | 1.834709  |
| C | 3.475197  | -1.612535 | 1.894615  |
| H | 1.252513  | -1.403739 | 0.582028  |
| H | 2.050829  | -1.599004 | 3.501805  |
| H | 2.220662  | -0.088612 | 2.621662  |
| H | 0.390133  | -3.303236 | 0.992629  |
| H | -1.134749 | 0.641547  | 2.925170  |
| H | 5.375447  | -1.610379 | 2.308581  |
| S | 0.385514  | 1.131446  | -2.488783 |
| O | 0.395306  | 0.530839  | -3.966701 |
| O | 1.444219  | 2.154407  | -2.525022 |
| O | -0.941669 | 1.695701  | -2.253507 |
| O | 0.705446  | 0.009796  | -1.584428 |
| H | -3.019713 | 1.363815  | -1.503523 |
| H | 1.683750  | -1.245948 | -2.232707 |
| O | -3.711116 | -3.450990 | -3.220136 |
| O | -0.566791 | -1.881186 | -3.920454 |
| O | -1.964786 | -2.500320 | -0.869024 |
| O | -2.676766 | -1.129696 | -3.747921 |
| O | -0.172182 | -3.818010 | -0.572866 |
| C | -2.338296 | -3.469146 | -3.542208 |
| C | -1.554107 | -4.239797 | -2.470101 |
| C | -1.812473 | -2.032230 | -3.751212 |
| C | -1.165219 | -3.491217 | -1.215404 |
| H | -2.183147 | -4.000455 | -4.493166 |
| H | -0.632430 | -4.653574 | -2.880002 |
| H | -2.172545 | -5.090249 | -2.163291 |
| H | -3.968097 | -2.526905 | -3.369171 |
| H | -0.117261 | -0.346637 | -3.989754 |
| H | -1.603622 | -1.977974 | -0.095503 |
| C | -4.741765 | 0.220007  | -1.544238 |
| N | -3.610475 | 0.910882  | -2.216251 |
| C | -4.020690 | 1.928344  | -3.221356 |
| H | -5.317898 | 0.943955  | -0.970363 |
| H | -4.341655 | -0.539236 | -0.875427 |
| H | -5.369808 | -0.248838 | -2.300428 |
| H | -3.027618 | 0.202105  | -2.711080 |

|        |           |           |           |
|--------|-----------|-----------|-----------|
| H      | -4.602468 | 2.706153  | -2.730797 |
| H      | -4.607015 | 1.434412  | -3.995430 |
| H      | -3.119227 | 2.359608  | -3.647787 |
| C      | -1.645499 | -3.659055 | 4.655891  |
| N      | -1.903005 | -3.137003 | 3.288294  |
| C      | -2.839092 | -3.964971 | 2.481792  |
| H      | -2.584514 | -3.685098 | 5.206422  |
| H      | -0.952350 | -2.986718 | 5.158829  |
| H      | -1.212885 | -4.657310 | 4.592197  |
| H      | -0.999799 | -3.042702 | 2.777117  |
| H      | -3.794288 | -4.021189 | 3.001391  |
| H      | -2.421791 | -4.962407 | 2.343945  |
| H      | -2.981932 | -3.479932 | 1.518227  |
| C      | 3.089322  | -1.272401 | -3.753379 |
| N      | 2.089228  | -1.959460 | -2.886002 |
| C      | 2.644918  | -3.119102 | -2.129208 |
| H      | 3.876843  | -0.869877 | -3.117918 |
| H      | 2.588768  | -0.462798 | -4.279646 |
| H      | 3.503322  | -1.991069 | -4.460332 |
| H      | 1.262701  | -2.240864 | -3.438617 |
| H      | 3.354317  | -2.751250 | -1.390313 |
| H      | 3.127162  | -3.797614 | -2.833678 |
| H      | 1.828383  | -3.624046 | -1.617395 |
| C      | 6.958058  | -1.397273 | 0.273916  |
| N      | 6.934886  | -1.443518 | 1.743670  |
| C      | 7.444038  | -0.205676 | 2.356532  |
| H      | 6.303568  | -0.591391 | -0.059597 |
| H      | 6.573354  | -2.337839 | -0.123174 |
| H      | 7.967395  | -1.221244 | -0.124234 |
| H      | 7.496320  | -2.228419 | 2.061624  |
| H      | 6.789658  | 0.619638  | 2.073200  |
| H      | 8.468412  | 0.033229  | 2.038714  |
| H      | 7.425442  | -0.304683 | 3.443702  |
| 3SA4MA |           |           |           |
| S      | -1.152117 | 3.952091  | -0.775228 |
| O      | -1.054182 | 2.814908  | -1.679993 |
| O      | -0.104935 | 4.918803  | -0.770132 |
| O      | -2.513190 | 4.680041  | -1.050240 |
| O      | -1.462711 | 3.420960  | 0.676913  |
| H      | -3.230902 | 3.988340  | -1.058275 |
| H      | -0.815549 | 2.735208  | 1.014082  |
| S      | 1.742609  | 0.770328  | -2.113852 |
| O      | 1.772733  | -0.638055 | -2.400480 |
| O      | 1.499409  | 1.206512  | -0.763339 |

|   |           |           |           |
|---|-----------|-----------|-----------|
| O | 3.089844  | 1.423359  | -2.661497 |
| O | 0.740885  | 1.477162  | -3.085221 |
| H | 3.841396  | 0.947107  | -2.246869 |
| H | 0.139078  | 2.080906  | -2.571792 |
| S | 4.901484  | -1.101502 | -0.376691 |
| O | 5.032672  | 0.193609  | -1.039566 |
| O | 5.149810  | -2.281805 | -1.161793 |
| O | 5.866549  | -1.112914 | 0.846280  |
| O | 3.498057  | -1.153924 | 0.279652  |
| H | 5.621889  | -0.338732 | 1.443392  |
| H | 2.929596  | -1.945561 | -0.038185 |
| O | -0.383424 | -4.339431 | -0.003663 |
| O | -1.300611 | -2.276721 | -2.793968 |
| O | 3.041396  | -3.631701 | -2.421145 |
| O | -1.208014 | -1.800747 | -0.595489 |
| O | 2.012985  | -3.039087 | -0.513208 |
| C | -0.504007 | -3.988039 | -1.357530 |
| C | 0.777301  | -4.253078 | -2.174342 |
| C | -1.026902 | -2.557023 | -1.536350 |
| C | 2.001809  | -3.570629 | -1.623811 |
| H | -1.286317 | -4.628713 | -1.774777 |
| H | 0.651015  | -3.949014 | -3.215121 |
| H | 0.979570  | -5.328644 | -2.174450 |
| H | 0.314257  | -3.780448 | 0.368431  |
| H | -1.711464 | -1.374941 | -2.872764 |
| H | 3.823152  | -3.187279 | -2.020359 |
| O | 3.476058  | 2.390921  | 4.024083  |
| O | 4.438214  | 2.376107  | 0.575382  |
| O | 1.786581  | 0.522533  | 2.630897  |
| O | 4.903339  | 0.917512  | 2.232404  |
| O | -0.024033 | 1.579500  | 1.869973  |
| C | 3.430755  | 2.777173  | 2.677989  |
| C | 1.996833  | 2.844050  | 2.103133  |
| C | 4.342632  | 1.915403  | 1.810197  |
| C | 1.171811  | 1.583577  | 2.188482  |
| H | 3.831631  | 3.794204  | 2.623476  |
| H | 2.017413  | 3.141988  | 1.051360  |
| H | 1.444450  | 3.617087  | 2.643273  |
| H | 3.462346  | 1.425703  | 4.047137  |
| H | 4.872772  | 1.716946  | -0.006812 |
| H | 1.181348  | -0.287665 | 2.632468  |
| O | -4.218163 | 2.627043  | -0.962784 |
| O | -2.720877 | 0.374039  | -0.645776 |
| O | -5.614385 | 0.633508  | 0.518026  |

|            |           |           |           |
|------------|-----------|-----------|-----------|
| O          | -2.712961 | 0.040863  | -2.876218 |
| O          | -5.602258 | -1.275058 | -0.673839 |
| C          | -4.283729 | 1.604379  | -1.946346 |
| C          | -5.622001 | 0.821564  | -1.847575 |
| C          | -3.119879 | 0.608293  | -1.878013 |
| C          | -5.638467 | -0.057963 | -0.616763 |
| H          | -4.234756 | 2.098260  | -2.915319 |
| H          | -5.746697 | 0.185730  | -2.722779 |
| H          | -6.429060 | 1.555651  | -1.802882 |
| H          | -4.337473 | 2.230963  | -0.086336 |
| H          | -2.062419 | -0.380393 | -0.624822 |
| H          | -5.435338 | 0.023249  | 1.289399  |
| O          | -3.260150 | -1.864911 | 4.483539  |
| O          | -4.228370 | -2.686994 | 1.132146  |
| O          | -1.705654 | -0.530718 | 2.246561  |
| O          | -4.792714 | -0.978181 | 2.485667  |
| O          | 0.218640  | -1.578843 | 2.730198  |
| C          | -3.249097 | -2.624653 | 3.299042  |
| C          | -1.811234 | -2.845545 | 2.797125  |
| C          | -4.164300 | -2.003482 | 2.252067  |
| C          | -0.999005 | -1.590324 | 2.596965  |
| H          | -3.669332 | -3.619660 | 3.500651  |
| H          | -1.810334 | -3.385245 | 1.844011  |
| H          | -1.274105 | -3.459243 | 3.520795  |
| H          | -3.786136 | -1.073995 | 4.299481  |
| H          | -4.824181 | -2.228778 | 0.480906  |
| H          | -1.106926 | 0.243776  | 2.092448  |
| 3SA4MA1DMA |           |           |           |
| S          | -2.087279 | 3.998774  | -0.570361 |
| O          | -1.741280 | 2.883446  | -1.433983 |
| O          | -1.237849 | 5.143846  | -0.545249 |
| O          | -3.544654 | 4.474394  | -0.904714 |
| O          | -2.338792 | 3.433474  | 0.883779  |
| H          | -4.145638 | 3.679539  | -0.876444 |
| H          | -1.653491 | 2.751455  | 1.154527  |
| S          | 1.004010  | 0.794032  | -2.393822 |
| O          | 0.925908  | -0.543607 | -2.909372 |
| O          | 0.904274  | 1.002619  | -0.969957 |
| O          | 2.305775  | 1.499705  | -2.954123 |
| O          | -0.066232 | 1.673945  | -3.137527 |
| H          | 3.106931  | 1.081181  | -2.544707 |
| H          | -0.573304 | 2.223379  | -2.491418 |
| S          | 5.025839  | -0.746651 | -1.327138 |
| O          | 4.430327  | 0.597019  | -1.547857 |

|   |           |           |           |
|---|-----------|-----------|-----------|
| O | 4.842478  | -1.630450 | -2.467709 |
| O | 6.390335  | -0.655384 | -0.810730 |
| O | 4.219965  | -1.378316 | -0.087006 |
| H | 6.439703  | -0.543253 | 0.853687  |
| H | 3.377108  | -1.816634 | -0.403669 |
| O | -0.139087 | -4.058828 | 0.023621  |
| O | -1.753868 | -2.381235 | -2.706972 |
| O | 2.710147  | -3.155915 | -3.014657 |
| O | -1.417386 | -1.720695 | -0.580840 |
| O | 2.070588  | -2.675892 | -0.912425 |
| C | -0.517278 | -3.844919 | -1.311944 |
| C | 0.639671  | -4.015756 | -2.315344 |
| C | -1.260934 | -2.517304 | -1.493423 |
| C | 1.872016  | -3.196320 | -2.010580 |
| H | -1.260861 | -4.611952 | -1.550257 |
| H | 0.312112  | -3.785338 | -3.329606 |
| H | 0.954118  | -5.064446 | -2.306802 |
| H | 0.573443  | -3.428382 | 0.211508  |
| H | -2.261918 | -1.532943 | -2.789809 |
| H | 3.503052  | -2.593099 | -2.809778 |
| O | 2.721462  | 3.159365  | 3.499410  |
| O | 3.643764  | 2.469568  | 0.116860  |
| O | 1.362192  | 0.817012  | 2.243363  |
| O | 4.350967  | 1.583964  | 2.071438  |
| O | -0.662956 | 1.633043  | 1.788249  |
| C | 2.652989  | 3.279990  | 2.099526  |
| C | 1.220632  | 3.098260  | 1.566146  |
| C | 3.644179  | 2.340590  | 1.416793  |
| C | 0.564732  | 1.778913  | 1.880840  |
| H | 2.960494  | 4.296685  | 1.827735  |
| H | 1.210056  | 3.195085  | 0.476669  |
| H | 0.587966  | 3.890491  | 1.970342  |
| H | 3.114287  | 2.295243  | 3.679404  |
| H | 4.114181  | 1.740862  | -0.376649 |
| H | 0.866574  | -0.055029 | 2.378861  |
| O | -4.978951 | 2.232447  | -0.704422 |
| O | -3.185434 | 0.213168  | -0.544470 |
| O | -5.998180 | 0.051827  | 0.884587  |
| O | -3.389222 | -0.201680 | -2.752385 |
| O | -5.840052 | -1.821461 | -0.351705 |
| C | -5.017653 | 1.202791  | -1.683095 |
| C | -6.239384 | 0.268245  | -1.466578 |
| C | -3.744398 | 0.350326  | -1.726488 |
| C | -6.030283 | -0.620324 | -0.260317 |



|   |           |           |           |
|---|-----------|-----------|-----------|
| H | -5.119722 | 1.694797  | -2.649078 |
| H | -6.375067 | -0.369261 | -2.338895 |
| H | -7.117572 | 0.901605  | -1.326548 |
| H | -4.925683 | 1.830008  | 0.175353  |
| H | -2.433406 | -0.455114 | -0.579488 |
| H | -5.696007 | -0.547579 | 1.624995  |
| O | -3.167406 | -2.244401 | 4.649177  |
| O | -4.196742 | -3.098817 | 1.324039  |
| O | -1.952817 | -0.687189 | 2.321085  |
| O | -4.894884 | -1.509386 | 2.757729  |
| O | 0.130430  | -1.445866 | 2.669335  |
| C | -3.118031 | -2.967865 | 3.442017  |
| C | -1.690451 | -2.986524 | 2.870160  |
| C | -4.157659 | -2.441735 | 2.460541  |
| C | -1.079762 | -1.631020 | 2.618772  |
| H | -3.397332 | -4.013095 | 3.633614  |
| H | -1.647214 | -3.530570 | 1.920611  |
| H | -1.037303 | -3.507642 | 3.570828  |
| H | -3.792822 | -1.519331 | 4.509654  |
| H | -4.878234 | -2.699118 | 0.718964  |
| H | -1.488075 | 0.164976  | 2.114100  |
| C | 6.026847  | -1.531313 | 2.648845  |
| N | 6.353800  | -0.306207 | 1.872776  |
| C | 7.581389  | 0.405439  | 2.312720  |
| H | 6.855692  | -2.234829 | 2.574204  |
| H | 5.129269  | -1.969070 | 2.218241  |
| H | 5.857532  | -1.264561 | 3.691834  |
| H | 5.550436  | 0.355539  | 1.913650  |
| H | 8.437920  | -0.262009 | 2.223521  |
| H | 7.465249  | 0.727694  | 3.347092  |
| H | 7.727498  | 1.273080  | 1.671346  |

#### 3SA4MA2DMA

|   |           |           |           |
|---|-----------|-----------|-----------|
| S | -3.761652 | 0.061549  | -2.261789 |
| O | -4.009549 | -1.335004 | -2.033257 |
| O | -4.802357 | 1.031177  | -2.283244 |
| O | -2.688504 | 0.544604  | -1.160825 |
| O | -2.955841 | 0.255979  | -3.615330 |
| H | -2.230749 | -0.242538 | -0.788057 |
| H | -2.155782 | -0.311305 | -3.596758 |
| S | 0.736845  | -0.225893 | -2.996768 |
| O | 0.316241  | 1.054427  | -3.523619 |
| O | 1.763354  | -0.976685 | -3.635998 |
| O | 1.118557  | -0.067630 | -1.483857 |
| O | -0.609123 | -1.082529 | -2.935787 |

|   |           |           |           |
|---|-----------|-----------|-----------|
| H | 0.645387  | 0.722462  | -1.064839 |
| H | -0.520117 | -1.892406 | -2.329455 |
| O | -0.678545 | 3.951923  | 1.399605  |
| O | -0.783329 | 3.103614  | -2.082251 |
| O | -3.019278 | 2.639018  | 1.485863  |
| O | -0.011035 | 1.944654  | -0.308103 |
| O | -4.660425 | 3.194991  | 0.058763  |
| C | -1.063079 | 4.091574  | 0.041944  |
| C | -2.571848 | 4.357611  | -0.122822 |
| C | -0.567601 | 2.916060  | -0.802154 |
| C | -3.523756 | 3.330722  | 0.461841  |
| H | -0.518772 | 4.958863  | -0.337009 |
| H | -2.823140 | 4.474280  | -1.176510 |
| H | -2.799856 | 5.306162  | 0.374496  |
| H | -1.257007 | 3.279739  | 1.793317  |
| H | -0.436639 | 2.355626  | -2.629737 |
| H | -3.718048 | 2.031511  | 1.876461  |
| S | -1.091593 | -3.146946 | 0.002970  |
| O | -0.310457 | -3.001451 | -1.252201 |
| O | -2.266632 | -3.990722 | -0.126796 |
| O | -0.230491 | -3.461814 | 1.134106  |
| O | -1.644800 | -1.633015 | 0.255685  |
| H | 1.009298  | -2.342053 | 1.829144  |
| H | -2.538923 | -1.695386 | 0.725502  |
| O | -6.026097 | -1.123982 | 3.510426  |
| O | -6.152740 | 1.012292  | 0.641193  |
| O | -4.883929 | -3.475305 | 0.384494  |
| O | -4.855792 | 1.038611  | 2.485005  |
| O | -4.005858 | -1.604546 | 1.268101  |
| C | -6.480496 | -0.710252 | 2.244904  |
| C | -6.385884 | -1.850749 | 1.218132  |
| C | -5.737043 | 0.542266  | 1.790197  |
| C | -4.970088 | -2.304666 | 0.965327  |
| H | -7.537933 | -0.427324 | 2.321110  |
| H | -6.801991 | -1.539043 | 0.254728  |
| H | -6.975330 | -2.700264 | 1.567103  |
| H | -5.217489 | -0.622876 | 3.685292  |
| H | -5.642561 | 1.824736  | 0.372577  |
| H | -3.940630 | -3.692358 | 0.170137  |
| O | 5.536281  | -3.564638 | -0.365062 |
| O | 2.291415  | -3.669240 | -1.673667 |
| O | 5.892744  | -0.812644 | -0.459302 |
| O | 2.947239  | -2.593599 | 0.192870  |
| O | 4.320565  | 0.190435  | -1.708607 |

|   |           |           |           |
|---|-----------|-----------|-----------|
| C | 4.616296  | -3.309894 | -1.403910 |
| C | 4.971166  | -2.064756 | -2.259090 |
| C | 3.191297  | -3.155272 | -0.859368 |
| C | 5.013686  | -0.780259 | -1.462713 |
| H | 4.622963  | -4.177262 | -2.066073 |
| H | 4.243529  | -1.938481 | -3.060362 |
| H | 5.961904  | -2.232636 | -2.691215 |
| H | 5.884100  | -2.716761 | -0.057808 |
| H | 1.369589  | -3.473987 | -1.371544 |
| H | 5.856772  | 0.043074  | 0.066498  |
| O | 4.754422  | 5.199232  | 0.132179  |
| O | 1.953120  | 3.906171  | 1.964303  |
| O | 3.975862  | 2.289252  | -0.120565 |
| O | 2.098424  | 4.934310  | -0.035600 |
| O | 5.710369  | 1.388477  | 0.984662  |
| C | 4.095013  | 4.701178  | 1.269863  |
| C | 4.803493  | 3.447091  | 1.791639  |
| C | 2.607262  | 4.509602  | 0.979848  |
| C | 4.879717  | 2.280317  | 0.833879  |
| H | 4.133356  | 5.445682  | 2.080697  |
| H | 4.308638  | 3.092759  | 2.700997  |
| H | 5.829721  | 3.698204  | 2.064683  |
| H | 4.063440  | 5.357786  | -0.528475 |
| H | 0.984289  | 3.884674  | 1.744523  |
| H | 4.101154  | 1.512666  | -0.738425 |
| C | 1.433461  | -0.319753 | 1.910940  |
| N | 1.406431  | -1.677478 | 2.519058  |
| C | 0.593683  | -1.767346 | 3.757434  |
| H | 0.420511  | -0.017940 | 1.650158  |
| H | 2.039559  | -0.365833 | 1.009978  |
| H | 1.860205  | 0.387817  | 2.622057  |
| H | 2.406686  | -1.998345 | 2.718066  |
| H | -0.432516 | -1.476707 | 3.537418  |
| H | 1.013871  | -1.106932 | 4.516322  |
| H | 0.604983  | -2.796541 | 4.112588  |
| C | 5.088488  | -1.686825 | 3.438421  |
| N | 4.056477  | -2.595047 | 2.923233  |
| C | 4.102360  | -3.921377 | 3.551940  |
| H | 4.883960  | -1.448254 | 4.486065  |
| H | 5.085355  | -0.757232 | 2.865893  |
| H | 6.097507  | -2.119402 | 3.383453  |
| H | 4.180869  | -2.711430 | 1.918073  |
| H | 3.868598  | -3.835294 | 4.616953  |
| H | 5.086451  | -4.399902 | 3.456614  |

H 3.359581 -4.571792 3.085727  
3SA4MA3DMA  
S -4.007083 0.362707 0.562921  
O -2.688999 -0.146086 -0.164898  
O -4.941920 -0.720649 0.681149  
O -3.613338 1.051265 1.771554  
O -4.580012 1.347116 -0.501677  
H -2.284225 0.206372 4.274803  
H -3.875497 1.956771 -0.883695  
S 0.321360 0.567211 1.832411  
O 0.982998 0.095956 3.222541  
O -0.171250 1.897122 2.089965  
O 1.373907 0.451264 0.811859  
O -0.762115 -0.438542 1.584333  
H 2.019702 -0.970797 0.562633  
H -1.921166 -0.184594 0.484140  
O 3.542915 -4.284080 0.037023  
O 2.412454 -2.087714 2.636932  
O 0.897718 -5.017267 -0.250942  
O 2.374560 -1.902724 0.388936  
O -0.363502 -4.531726 1.544793  
C 3.105669 -3.969484 1.348395  
C 1.999841 -4.935662 1.843331  
C 2.613544 -2.529811 1.516465  
C 0.715992 -4.810459 1.049416  
H 3.972484 -4.071066 2.001331  
H 1.779310 -4.730644 2.888710  
H 2.375804 -5.957211 1.742721  
H 2.758857 -4.465967 -0.503234  
H 1.586167 -0.674595 3.041930  
H 0.037207 -4.892780 -0.767583  
S -1.915100 2.415925 -2.708253  
O -2.758721 2.884148 -1.569900  
O -2.590101 1.478276 -3.600378  
O -1.658390 3.698590 -3.602361  
O -0.611914 1.944544 -2.228917  
H -1.175634 4.358947 -3.035108  
H -0.138576 0.479959 -2.821531  
O -3.323137 -4.681826 -3.378683  
O -2.632621 -4.098383 0.093476  
O -4.064938 -0.685364 -2.971346  
O -1.287501 -4.679576 -1.611954  
O -2.211399 -1.966290 -2.975225  
C -3.612135 -4.237916 -2.077049

|   |           |           |           |
|---|-----------|-----------|-----------|
| C | -4.251975 | -2.839908 | -2.054685 |
| C | -2.383036 | -4.349750 | -1.176676 |
| C | -3.399512 | -1.786191 | -2.718407 |
| H | -4.344146 | -4.937890 | -1.661908 |
| H | -4.453003 | -2.498636 | -1.033842 |
| H | -5.214256 | -2.879327 | -2.568883 |
| H | -2.503266 | -4.245889 | -3.642721 |
| H | -1.812398 | -4.228751 | 0.638137  |
| H | -3.480554 | 0.062479  | -3.259124 |
| O | 1.669021  | 6.435971  | -0.567704 |
| O | -1.221057 | 4.423128  | 0.071330  |
| O | 1.884658  | 3.336326  | -0.673410 |
| O | -0.334495 | 5.243967  | -1.837824 |
| O | 3.345324  | 3.304049  | 1.032839  |
| C | 0.742333  | 5.747345  | 0.238940  |
| C | 1.455053  | 4.761513  | 1.177487  |
| C | -0.330733 | 5.091098  | -0.623561 |
| C | 2.331424  | 3.736338  | 0.499154  |
| H | 0.207199  | 6.465169  | 0.877480  |
| H | 0.718989  | 4.196446  | 1.757727  |
| H | 2.085269  | 5.316799  | 1.872135  |
| H | 1.396840  | 6.278537  | -1.483397 |
| H | -1.841903 | 3.914923  | -0.512309 |
| H | 2.441573  | 2.599646  | -1.032953 |
| O | 7.398927  | 0.104973  | -0.105960 |
| O | 5.201548  | -2.492437 | -1.228145 |
| O | 5.025153  | 1.609088  | -0.002345 |
| O | 5.512097  | -1.684349 | 0.852443  |
| O | 3.565190  | 1.406166  | -1.695769 |
| C | 6.586509  | -0.576910 | -1.019587 |
| C | 5.718200  | 0.357083  | -1.901226 |
| C | 5.717877  | -1.638406 | -0.337166 |
| C | 4.653686  | 1.164418  | -1.185760 |
| H | 7.260050  | -1.108546 | -1.696747 |
| H | 5.233883  | -0.210157 | -2.695397 |
| H | 6.396941  | 1.080163  | -2.365978 |
| H | 6.816556  | 0.525249  | 0.539930  |
| H | 4.625193  | -3.136921 | -0.752033 |
| H | 4.323203  | 2.211598  | 0.408426  |
| C | -1.318923 | -1.567939 | 4.925705  |
| N | -2.232642 | -0.847547 | 4.001892  |
| C | -3.594078 | -1.439581 | 3.926663  |
| H | -1.748770 | -1.568856 | 5.927635  |
| H | -0.357481 | -1.059987 | 4.926276  |

|   |           |           |           |
|---|-----------|-----------|-----------|
| H | -1.188717 | -2.593943 | 4.579725  |
| H | -1.795749 | -0.819393 | 3.061969  |
| H | -4.046010 | -1.413593 | 4.918676  |
| H | -3.524723 | -2.472445 | 3.584052  |
| H | -4.192475 | -0.863067 | 3.226730  |
| C | 0.340472  | -0.060661 | -4.751759 |
| N | 0.083920  | -0.411195 | -3.330109 |
| C | 1.208075  | -1.105279 | -2.646429 |
| H | 1.212630  | 0.589825  | -4.804007 |
| H | -0.533700 | 0.462769  | -5.135176 |
| H | 0.517501  | -0.970588 | -5.325015 |
| H | -0.780807 | -0.983123 | -3.265149 |
| H | 2.057420  | -0.426473 | -2.574073 |
| H | 1.476814  | -1.999196 | -3.209395 |
| H | 0.885314  | -1.385281 | -1.646934 |
| C | -3.491682 | 2.525250  | 4.740060  |
| N | -2.197799 | 1.885517  | 4.464221  |
| C | -1.129842 | 2.339836  | 5.366886  |
| H | -3.859201 | 2.208378  | 5.720651  |
| H | -4.208413 | 2.225128  | 3.976054  |
| H | -3.421467 | 3.621504  | 4.744048  |
| H | -1.918318 | 2.102998  | 3.507589  |
| H | -1.342119 | 2.008066  | 6.387608  |
| H | -1.033478 | 3.433893  | 5.379912  |
| H | -0.179079 | 1.914158  | 5.044818  |

#### 3SA4MA4DMA

|   |           |           |           |
|---|-----------|-----------|-----------|
| S | 3.409042  | 0.742026  | 1.388185  |
| O | 4.098138  | 1.348622  | 0.265361  |
| O | 2.218519  | 1.441097  | 1.861604  |
| O | 2.778128  | -0.684027 | 0.722039  |
| O | 4.290488  | 0.237886  | 2.442324  |
| H | 1.828076  | -0.715320 | 0.930741  |
| H | 3.511375  | -2.093543 | 1.504884  |
| S | -1.118890 | -1.342995 | 1.841199  |
| O | -0.905921 | -0.484262 | 2.985448  |
| O | -1.936073 | -2.507634 | 1.946675  |
| O | -1.655359 | -0.470217 | 0.645617  |
| O | 0.329044  | -1.765516 | 1.367520  |
| H | -1.348677 | 0.494956  | 0.738837  |
| H | 0.321745  | -2.491027 | 0.633401  |
| O | -0.830319 | 4.720974  | 0.457108  |
| O | -0.445421 | 2.224131  | 2.969880  |
| O | 1.500601  | 3.910445  | -0.516130 |
| O | -0.933804 | 2.003343  | 0.780137  |

|   |           |           |           |
|---|-----------|-----------|-----------|
| O | 3.317210  | 4.282438  | 0.741457  |
| C | -0.293881 | 4.169568  | 1.649463  |
| C | 1.210867  | 4.480070  | 1.803534  |
| C | -0.586029 | 2.670910  | 1.747024  |
| C | 2.031247  | 4.178265  | 0.568682  |
| H | -0.832309 | 4.628013  | 2.479829  |
| H | 1.636190  | 3.918542  | 2.636115  |
| H | 1.333827  | 5.545004  | 2.023311  |
| H | -0.224630 | 4.438923  | -0.253921 |
| H | -0.567527 | 1.245909  | 3.009555  |
| H | 2.291348  | 3.248064  | -1.802049 |
| S | 1.311079  | -3.261357 | -1.622396 |
| O | 0.433055  | -3.535906 | -0.435991 |
| O | 2.732947  | -3.304741 | -1.256058 |
| O | 0.920900  | -4.024224 | -2.778445 |
| O | 0.978638  | -1.704731 | -1.910002 |
| H | -1.025160 | -0.170504 | -2.942438 |
| H | 1.801833  | -1.231707 | -2.213863 |
| O | 4.208310  | 1.575252  | -4.478267 |
| O | 4.587783  | 3.546884  | -1.549649 |
| O | 4.682421  | -1.480534 | -1.634237 |
| O | 2.739023  | 2.714662  | -2.514344 |
| O | 3.107547  | -0.322730 | -2.723770 |
| C | 4.860254  | 1.880236  | -3.265632 |
| C | 5.324644  | 0.621822  | -2.498761 |
| C | 4.048688  | 2.803549  | -2.351915 |
| C | 4.255199  | -0.423324 | -2.287806 |
| H | 5.753825  | 2.451011  | -3.523985 |
| H | 5.716019  | 0.889418  | -1.515127 |
| H | 6.132506  | 0.144105  | -3.061261 |
| H | 3.469672  | 0.996121  | -4.246892 |
| H | 3.814411  | 4.020418  | -0.085989 |
| H | 3.944392  | -2.137344 | -1.522899 |
| O | -5.190014 | -4.585639 | -1.449103 |
| O | -1.975222 | -4.799551 | -0.272263 |
| O | -5.836816 | -2.025190 | -0.549525 |
| O | -2.801142 | -2.997307 | -1.334137 |
| O | -4.823192 | -1.377111 | 1.342803  |
| C | -4.343872 | -4.550050 | -0.321770 |
| C | -4.923547 | -3.729728 | 0.856613  |
| C | -2.953652 | -4.027817 | -0.700490 |
| C | -5.168142 | -2.262113 | 0.580035  |
| H | -4.230073 | -5.580592 | 0.015753  |
| H | -4.267469 | -3.789251 | 1.724369  |

|   |           |           |           |
|---|-----------|-----------|-----------|
| H | -5.889818 | -4.177279 | 1.111057  |
| H | -5.471137 | -3.678838 | -1.628462 |
| H | -1.095784 | -4.384732 | -0.461150 |
| H | -5.987597 | -1.039964 | -0.658709 |
| O | -6.308836 | 3.614960  | 1.876366  |
| O | -3.416519 | 4.309627  | -0.131107 |
| O | -4.885753 | 1.236059  | 0.863483  |
| O | -3.656420 | 3.948786  | 2.080689  |
| O | -6.180411 | 0.591579  | -0.853494 |
| C | -5.616501 | 3.922465  | 0.692309  |
| C | -5.961562 | 2.931742  | -0.429439 |
| C | -4.117638 | 4.044868  | 0.964058  |
| C | -5.691321 | 1.470188  | -0.149139 |
| H | -5.927957 | 4.915616  | 0.337338  |
| H | -5.418127 | 3.198075  | -1.340883 |
| H | -7.025263 | 3.008550  | -0.663413 |
| H | -5.628558 | 3.470777  | 2.551138  |
| H | -2.460618 | 4.443577  | 0.111518  |
| H | -4.822132 | 0.253821  | 1.041322  |
| C | -3.102528 | -0.247923 | -2.695731 |
| N | -1.781185 | -0.916493 | -2.835441 |
| C | -1.705211 | -1.866773 | -3.980576 |
| H | -3.325324 | 0.299968  | -3.610977 |
| H | -3.055724 | 0.439920  | -1.853498 |
| H | -3.860771 | -1.002799 | -2.506189 |
| H | -1.607289 | -1.454413 | -1.979758 |
| H | -1.821549 | -1.309539 | -4.910030 |
| H | -2.498689 | -2.603581 | -3.875509 |
| H | -0.739478 | -2.367303 | -3.950783 |
| C | 0.525994  | 1.176104  | -4.703055 |
| N | 0.036368  | 1.217416  | -3.315692 |
| C | -0.618152 | 2.497650  | -2.999568 |
| H | -0.317125 | 1.274031  | -5.392822 |
| H | 1.011848  | 0.216372  | -4.889148 |
| H | 1.241617  | 1.979417  | -4.916037 |
| H | 0.847634  | 1.123468  | -2.708234 |
| H | -1.539733 | 2.591289  | -3.581072 |
| H | 0.018293  | 3.360203  | -3.235529 |
| H | -0.870432 | 2.527083  | -1.938416 |
| C | 3.340861  | -4.134966 | 1.898657  |
| N | 3.981642  | -2.809253 | 2.096812  |
| C | 5.435048  | -2.770134 | 1.786893  |
| H | 3.417506  | -4.421900 | 0.851542  |
| H | 2.288182  | -4.056767 | 2.166834  |



|   |          |           |          |
|---|----------|-----------|----------|
| H | 3.831076 | -4.869506 | 2.538258 |
| H | 3.826790 | -2.465523 | 3.100975 |
| H | 5.590855 | -3.045840 | 0.744533 |
| H | 5.962480 | -3.467367 | 2.438716 |
| H | 5.780474 | -1.751494 | 1.953601 |
| C | 2.161330 | -1.621746 | 5.072596 |
| N | 3.556682 | -1.622019 | 4.612407 |
| C | 4.511622 | -1.851770 | 5.700750 |
| H | 1.887750 | -2.619321 | 5.428432 |
| H | 1.498213 | -1.354992 | 4.248580 |
| H | 1.990487 | -0.911112 | 5.893184 |
| H | 3.759376 | -0.725427 | 4.166082 |
| H | 4.384704 | -2.862262 | 6.100331 |
| H | 4.385907 | -1.142840 | 6.531540 |
| H | 5.531749 | -1.756897 | 5.322558 |

#### 4MA

|   |           |           |           |
|---|-----------|-----------|-----------|
| O | -0.972568 | -5.569179 | 0.028921  |
| O | -2.723231 | -2.887490 | -1.577310 |
| O | 0.431815  | -2.803777 | -0.418850 |
| O | -2.522486 | -3.486240 | 0.585426  |
| O | 2.023640  | -4.004766 | -1.456510 |
| C | -1.443742 | -4.830960 | -1.072182 |
| C | -0.272582 | -4.438601 | -1.986992 |
| C | -2.275673 | -3.642636 | -0.605224 |
| C | 0.848331  | -3.735054 | -1.256275 |
| H | -2.131616 | -5.446016 | -1.671011 |
| H | -0.631628 | -3.784571 | -2.787012 |
| H | 0.149673  | -5.334400 | -2.440325 |
| H | -1.343605 | -5.150641 | 0.819193  |
| H | -3.315168 | -2.164529 | -1.219185 |
| H | 1.201709  | -2.392571 | 0.065803  |
| O | 4.401862  | -1.164744 | 2.851058  |
| O | 4.083866  | -3.046372 | -0.117259 |
| O | 4.037080  | 1.350373  | 1.494194  |
| O | 2.523588  | -1.776950 | 0.900521  |
| O | 4.222170  | 1.024292  | -0.722423 |
| C | 4.821866  | -1.544770 | 1.570521  |
| C | 5.476658  | -0.388345 | 0.763867  |
| C | 3.680272  | -2.149438 | 0.752063  |
| C | 4.518893  | 0.730944  | 0.427272  |
| H | 5.579738  | -2.318062 | 1.704458  |
| H | 5.890758  | -0.768924 | -0.169361 |
| H | 6.280493  | 0.015807  | 1.383701  |
| H | 3.740978  | -0.467102 | 2.756498  |

|   |           |           |           |
|---|-----------|-----------|-----------|
| H | 3.310145  | -3.396638 | -0.652487 |
| H | 3.439415  | 2.103717  | 1.220078  |
| O | -5.830228 | 1.092502  | -0.035427 |
| O | -3.798436 | -1.371317 | 1.589836  |
| O | -2.719658 | 1.570933  | 0.430046  |
| O | -4.323234 | -1.024360 | -0.573955 |
| O | -3.296035 | 3.403322  | 1.597360  |
| C | -5.272274 | 0.427229  | 1.071473  |
| C | -4.546439 | 1.429968  | 1.976323  |
| C | -4.387043 | -0.725091 | 0.613339  |
| C | -3.430820 | 2.144428  | 1.248975  |
| H | -6.068919 | -0.039002 | 1.669743  |
| H | -4.114480 | 0.913047  | 2.838629  |
| H | -5.260445 | 2.165544  | 2.346152  |
| H | -5.531382 | 0.614816  | -0.822569 |
| H | -3.294412 | -2.158198 | 1.236803  |
| H | -1.514283 | 2.258309  | -0.494472 |
| O | 0.493617  | 4.240332  | -2.869445 |
| O | -1.390511 | 4.536120  | 0.127351  |
| O | 2.664280  | 3.040208  | -1.472958 |
| O | -0.828998 | 2.711125  | -1.067029 |
| O | 2.551127  | 3.426935  | 0.738200  |
| C | 0.257384  | 4.777930  | -1.597764 |
| C | 1.546462  | 5.011648  | -0.764371 |
| C | -0.753071 | 3.986473  | -0.761238 |
| C | 2.300032  | 3.749677  | -0.413131 |
| H | -0.200445 | 5.756670  | -1.752667 |
| H | 1.301768  | 5.526177  | 0.163834  |
| H | 2.205686  | 5.642985  | -1.366205 |
| H | 1.020868  | 3.437817  | -2.768649 |
| H | -2.555091 | 3.830793  | 1.080113  |
| H | 3.209433  | 2.246973  | -1.194978 |

#### 4MA1DMA

|   |           |          |           |
|---|-----------|----------|-----------|
| O | -3.560433 | 4.666623 | 0.247403  |
| O | -3.809581 | 1.327629 | 1.526361  |
| O | -1.118276 | 2.879532 | 0.012208  |
| O | -4.111124 | 2.180650 | -0.536697 |
| O | 0.097293  | 4.210958 | 1.353048  |
| C | -3.507468 | 3.670802 | 1.238759  |
| C | -2.159892 | 3.712573 | 1.979461  |
| C | -3.827444 | 2.302131 | 0.648711  |
| C | -0.947416 | 3.636487 | 1.078835  |
| H | -4.291142 | 3.855136 | 1.986938  |
| H | -2.103129 | 2.887918 | 2.696867  |

|   |           |           |           |
|---|-----------|-----------|-----------|
| H | -2.082712 | 4.643706  | 2.540507  |
| H | -3.729846 | 4.211794  | -0.590138 |
| H | -4.092692 | 0.465305  | 1.103472  |
| H | -0.314694 | 2.916560  | -0.579006 |
| O | 3.023008  | 2.651024  | -3.254212 |
| O | 2.347465  | 4.075537  | -0.036101 |
| O | 3.146697  | 1.000404  | -0.551250 |
| O | 1.032079  | 3.059892  | -1.556271 |
| O | 5.213378  | 0.404570  | -1.198164 |
| C | 3.344969  | 3.358468  | -2.081148 |
| C | 4.556142  | 2.707997  | -1.395684 |
| C | 2.122688  | 3.471902  | -1.175848 |
| C | 4.345084  | 1.250365  | -1.052180 |
| H | 3.624550  | 4.393472  | -2.328023 |
| H | 4.790540  | 3.246131  | -0.472091 |
| H | 5.420943  | 2.769134  | -2.055214 |
| H | 2.071016  | 2.478514  | -3.216811 |
| H | 1.501970  | 4.141704  | 0.499999  |
| H | 3.036913  | 0.020206  | -0.366171 |
| O | -4.930186 | -3.455093 | -0.416403 |
| O | -4.257584 | -0.197827 | -1.753183 |
| O | -1.999820 | -2.495347 | -0.561634 |
| O | -4.571167 | -0.928509 | 0.354443  |
| O | -1.402028 | -3.965090 | -2.152221 |
| C | -4.694540 | -2.516207 | -1.436278 |
| C | -3.539729 | -2.970848 | -2.339210 |
| C | -4.480637 | -1.125518 | -0.851456 |
| C | -2.237561 | -3.124338 | -1.587702 |
| H | -5.589806 | -2.433892 | -2.068167 |
| H | -3.382011 | -2.251110 | -3.148524 |
| H | -3.795450 | -3.926986 | -2.797577 |
| H | -4.796137 | -2.991417 | 0.422131  |
| H | -4.196389 | 0.701366  | -1.324543 |
| H | -0.691110 | -2.772789 | 0.445560  |
| O | 2.343941  | -3.433965 | 2.476407  |
| O | 0.819204  | -4.131016 | -0.712480 |
| O | 4.963572  | -2.168892 | -0.468964 |
| O | 0.090403  | -2.938643 | 1.044381  |
| O | 2.854903  | -1.548203 | -0.007453 |
| C | 2.238329  | -4.024064 | 1.218605  |
| C | 3.492779  | -3.833688 | 0.344787  |
| C | 0.978467  | -3.680785 | 0.417430  |
| C | 3.738538  | -2.401761 | -0.052697 |
| H | 2.149976  | -5.105532 | 1.386026  |

|         |           |           |           |
|---------|-----------|-----------|-----------|
| H       | 3.401459  | -4.414254 | -0.578533 |
| H       | 4.367256  | -4.204279 | 0.881623  |
| H       | 2.117581  | -2.468251 | 2.468763  |
| H       | -0.547786 | -4.013859 | -1.629141 |
| H       | 5.065800  | -1.217525 | -0.754616 |
| C       | 0.526270  | -1.128412 | 3.996685  |
| N       | 1.431640  | -0.837263 | 2.883782  |
| C       | 2.276259  | 0.334372  | 3.112873  |
| H       | 1.114068  | -1.395118 | 4.879065  |
| H       | -0.095807 | -1.984760 | 3.734947  |
| H       | -0.122925 | -0.279651 | 4.262994  |
| H       | 0.891166  | -0.713676 | 2.034045  |
| H       | 2.968196  | 0.129410  | 3.934326  |
| H       | 1.703922  | 1.239689  | 3.370699  |
| H       | 2.861804  | 0.543174  | 2.216713  |
| 4MA2DMA |           |           |           |
| O       | 0.198785  | 5.456432  | 0.140947  |
| O       | -1.785859 | 2.863402  | 1.605023  |
| O       | 1.231485  | 2.470820  | 0.606110  |
| O       | -1.710019 | 3.714834  | -0.477421 |
| O       | 2.947004  | 3.460965  | 1.663911  |
| C       | -0.379774 | 4.752580  | 1.214353  |
| C       | 0.723044  | 4.219011  | 2.133602  |
| C       | -1.347745 | 3.692704  | 0.696414  |
| C       | 1.750619  | 3.357753  | 1.437286  |
| H       | -1.007360 | 5.424710  | 1.822499  |
| H       | 0.272734  | 3.625914  | 2.934868  |
| H       | 1.255375  | 5.055476  | 2.584610  |
| H       | -0.342327 | 5.257055  | -0.636545 |
| H       | -2.425629 | 2.201626  | 1.195015  |
| H       | 1.951639  | 1.921964  | 0.190583  |
| O       | 5.066457  | -0.183988 | -2.234154 |
| O       | 4.877896  | 2.070457  | 0.514172  |
| O       | 4.447419  | -2.372682 | -0.626220 |
| O       | 3.194814  | 1.075192  | -0.600866 |
| O       | 4.496317  | -1.794312 | 1.546549  |
| C       | 5.479423  | 0.365037  | -1.010595 |
| C       | 5.988720  | -0.693280 | 0.005756  |
| C       | 4.385695  | 1.214251  | -0.352395 |
| C       | 4.909037  | -1.676658 | 0.405810  |
| H       | 6.311213  | 1.041373  | -1.222052 |
| H       | 6.358110  | -0.202056 | 0.904271  |
| H       | 6.804997  | -1.240429 | -0.472606 |
| H       | 4.637392  | -1.031707 | -2.050722 |

|   |           |           |           |
|---|-----------|-----------|-----------|
| H | 4.147082  | 2.591482  | 0.962879  |
| H | 3.678594  | -2.972442 | -0.341741 |
| O | -5.589453 | -0.498999 | 0.054710  |
| O | -3.929289 | 2.356522  | -1.336493 |
| O | -2.456720 | -0.237141 | -2.665458 |
| O | -3.468656 | 1.179904  | 0.522224  |
| O | -3.333660 | -2.129672 | -1.822822 |
| C | -5.207365 | 0.376908  | -0.946704 |
| C | -4.812061 | -0.323457 | -2.291580 |
| C | -4.111233 | 1.346152  | -0.505562 |
| C | -3.416782 | -0.899688 | -2.287723 |
| H | -6.077472 | 0.997653  | -1.190884 |
| H | -4.858170 | 0.408711  | -3.097790 |
| H | -5.550471 | -1.109009 | -2.451482 |
| H | -4.826976 | -0.882377 | 0.573905  |
| H | -3.134104 | 2.878918  | -1.059271 |
| H | 0.404569  | -0.420754 | -1.374999 |
| O | -0.868102 | -2.409855 | 2.156407  |
| O | -0.826591 | -2.664132 | -1.357435 |
| O | 2.180880  | -3.112330 | 2.152643  |
| O | 0.265896  | -1.283223 | 0.040485  |
| O | 2.424413  | -3.820589 | 0.033707  |
| C | -0.724686 | -3.204627 | 0.993224  |
| C | 0.371597  | -4.296948 | 1.161555  |
| C | -0.416360 | -2.310022 | -0.223273 |
| C | 1.761938  | -3.729780 | 1.064594  |
| H | -1.669570 | -3.723953 | 0.825937  |
| H | 0.261105  | -5.037404 | 0.369362  |
| H | 0.222086  | -4.761687 | 2.137592  |
| H | -0.271810 | -1.656768 | 2.016082  |
| H | -2.369025 | -2.405443 | -1.725639 |
| H | 3.056087  | -2.678309 | 1.980296  |
| C | -4.464373 | -1.040040 | 3.097786  |
| N | -4.028681 | -1.771409 | 1.905373  |
| C | -4.545768 | -3.141024 | 1.864555  |
| H | -5.550039 | -0.914419 | 3.068875  |
| H | -4.012817 | -0.047014 | 3.092672  |
| H | -4.197912 | -1.547890 | 4.037019  |
| H | -3.010708 | -1.799503 | 1.900636  |
| H | -5.637643 | -3.113011 | 1.813896  |
| H | -4.257294 | -3.741024 | 2.741260  |
| H | -4.187188 | -3.638531 | 0.961113  |
| C | 0.452880  | 1.337055  | -2.576487 |
| N | 0.307501  | -0.127902 | -2.390779 |

|         |           |           |           |
|---------|-----------|-----------|-----------|
| C       | 1.259765  | -0.942680 | -3.186769 |
| H       | 1.470044  | 1.627742  | -2.321928 |
| H       | -0.256300 | 1.849120  | -1.929060 |
| H       | 0.240392  | 1.588285  | -3.616114 |
| H       | -0.671228 | -0.397127 | -2.605826 |
| H       | 2.273995  | -0.667833 | -2.899399 |
| H       | 1.108960  | -0.749171 | -4.249281 |
| H       | 1.064352  | -1.989328 | -2.961418 |
| 4MA3DMA |           |           |           |
| O       | -1.312228 | 6.041360  | -0.082823 |
| O       | 1.268580  | 3.916253  | -1.385838 |
| O       | -1.742970 | 2.993956  | -0.479628 |
| O       | 0.826865  | 4.654976  | 0.693339  |
| O       | -3.415579 | 3.386781  | -1.926520 |
| C       | -0.532960 | 5.462226  | -1.100019 |
| C       | -1.436429 | 4.722069  | -2.092022 |
| C       | 0.582230  | 4.609487  | -0.504570 |
| C       | -2.307552 | 3.644875  | -1.483917 |
| H       | -0.007826 | 6.246957  | -1.668227 |
| H       | -0.826878 | 4.261544  | -2.875469 |
| H       | -2.103822 | 5.436078  | -2.574446 |
| H       | -0.860046 | 5.853548  | 0.752170  |
| H       | 2.022212  | 3.419464  | -0.931579 |
| H       | -2.391290 | 2.341880  | -0.071651 |
| O       | -5.011647 | -0.571750 | 1.944196  |
| O       | -4.937741 | 1.346033  | -1.094871 |
| O       | -4.701739 | -3.511850 | -0.407235 |
| O       | -3.440099 | 1.268969  | 0.581645  |
| O       | -3.340304 | -1.744508 | -0.669023 |
| C       | -5.398665 | -0.160228 | 0.673139  |
| C       | -5.670515 | -1.352009 | -0.275507 |
| C       | -4.469993 | 0.878773  | 0.047839  |
| C       | -4.454737 | -2.224034 | -0.466869 |
| H       | -6.357830 | 0.363580  | 0.775555  |
| H       | -5.980612 | -0.984665 | -1.258470 |
| H       | -6.478053 | -1.953440 | 0.139890  |
| H       | -4.029457 | -0.638430 | 2.064193  |
| H       | -4.368438 | 2.092394  | -1.429011 |
| H       | -3.858970 | -4.045031 | -0.511414 |
| O       | 5.378175  | 1.069117  | 0.551907  |
| O       | 2.830905  | 3.222684  | 1.851944  |
| O       | 2.028359  | 0.105456  | 1.226542  |
| O       | 3.155789  | 2.518641  | -0.258764 |
| O       | 3.168964  | -1.615990 | 2.107342  |

|   |           |           |           |
|---|-----------|-----------|-----------|
| C | 4.544033  | 1.612080  | 1.525543  |
| C | 3.973893  | 0.581325  | 2.528603  |
| C | 3.425855  | 2.481442  | 0.937180  |
| C | 2.960380  | -0.347872 | 1.887948  |
| H | 5.156861  | 2.308759  | 2.108608  |
| H | 3.461392  | 1.116531  | 3.332998  |
| H | 4.797646  | 0.011391  | 2.956306  |
| H | 4.999747  | 0.271400  | 0.105161  |
| H | 2.095001  | 3.754890  | 1.452783  |
| H | 1.640368  | -1.129536 | -1.360415 |
| O | 0.974294  | -4.754471 | -2.318455 |
| O | 1.797843  | -3.329001 | 0.852051  |
| O | -1.089887 | -3.133152 | -0.586770 |
| O | 2.141093  | -2.657288 | -1.276507 |
| O | -2.443386 | -4.915922 | -0.520411 |
| C | 1.185326  | -4.809912 | -0.922341 |
| C | -0.091751 | -5.271358 | -0.217731 |
| C | 1.740314  | -3.473489 | -0.386523 |
| C | -1.319539 | -4.433150 | -0.473923 |
| H | 1.962029  | -5.554913 | -0.687418 |
| H | 0.086235  | -5.259271 | 0.862503  |
| H | -0.337248 | -6.293234 | -0.507582 |
| H | 1.433964  | -3.944596 | -2.589486 |
| H | 2.530858  | -2.235757 | 1.572665  |
| H | -1.954975 | -2.641106 | -0.678356 |
| C | 5.685068  | -1.102708 | -2.083650 |
| N | 5.023334  | -1.360581 | -0.801344 |
| C | 5.859203  | -2.178909 | 0.087180  |
| H | 6.560893  | -0.468928 | -1.920990 |
| H | 5.008313  | -0.569481 | -2.754830 |
| H | 6.016116  | -2.022393 | -2.589233 |
| H | 4.144328  | -1.850098 | -0.968206 |
| H | 6.745539  | -1.607802 | 0.375923  |
| H | 6.191712  | -3.115341 | -0.385282 |
| H | 5.297937  | -2.418970 | 0.989988  |
| C | 1.973295  | 0.558840  | -2.558041 |
| N | 1.309932  | -0.121933 | -1.417703 |
| C | -0.175208 | -0.086442 | -1.467111 |
| H | 1.778674  | -0.006942 | -3.469045 |
| H | 3.041822  | 0.606556  | -2.361786 |
| H | 1.581695  | 1.570065  | -2.655819 |
| H | 1.622363  | 0.274331  | -0.517043 |
| H | -0.516456 | -0.586598 | -2.372423 |
| H | -0.507920 | 0.950103  | -1.453955 |

|         |           |           |           |
|---------|-----------|-----------|-----------|
| H       | -0.562828 | -0.608222 | -0.597329 |
| C       | -1.176768 | -0.776772 | 2.519247  |
| N       | -2.518875 | -0.836321 | 3.103310  |
| C       | -2.759912 | 0.232740  | 4.077707  |
| H       | -1.082867 | 0.140747  | 1.935522  |
| H       | -1.020178 | -1.625653 | 1.852015  |
| H       | -0.376554 | -0.779875 | 3.274028  |
| H       | -2.643430 | -1.734235 | 3.561487  |
| H       | -2.744600 | 1.193121  | 3.557710  |
| H       | -2.010830 | 0.261794  | 4.883656  |
| H       | -3.751055 | 0.107061  | 4.516523  |
| 4MA4DMA |           |           |           |
| O       | -6.057293 | -1.728466 | 0.155052  |
| O       | -2.752167 | -2.968465 | 0.791004  |
| O       | -4.668204 | 0.634019  | 0.219056  |
| O       | -3.683431 | -2.240889 | -1.123735 |
| O       | -3.389639 | 1.081304  | 1.998054  |
| C       | -4.951133 | -2.077741 | 0.940125  |
| C       | -4.588308 | -0.990170 | 1.976572  |
| C       | -3.730979 | -2.435679 | 0.083555  |
| C       | -4.179800 | 0.343583  | 1.348938  |
| H       | -5.213086 | -2.990189 | 1.484403  |
| H       | -3.796402 | -1.335296 | 2.641654  |
| H       | -5.478759 | -0.807810 | 2.586482  |
| H       | -5.849865 | -0.840548 | -0.179984 |
| H       | -1.960395 | -3.163090 | 0.216807  |
| H       | -4.045321 | 1.669580  | -0.841872 |
| O       | -1.542296 | 4.048260  | -1.742577 |
| O       | -2.455327 | 3.158400  | 0.753530  |
| O       | 0.505245  | 2.465017  | -2.261046 |
| O       | -0.375903 | 2.274071  | 0.853624  |
| O       | 2.502297  | 2.761276  | -1.285848 |
| C       | -0.792376 | 4.227809  | -0.524612 |
| C       | 0.716509  | 4.301340  | -0.773673 |
| C       | -1.161268 | 3.104098  | 0.458682  |
| C       | 1.335198  | 3.079271  | -1.446344 |
| H       | -1.137213 | 5.170794  | -0.094464 |
| H       | 1.238618  | 4.467324  | 0.168758  |
| H       | 0.920025  | 5.162133  | -1.420532 |
| H       | -0.985371 | 3.445326  | -2.272308 |
| H       | -2.762983 | 2.373999  | 1.317221  |
| H       | 0.844588  | 1.521617  | -2.711700 |
| O       | 1.809274  | -3.584684 | -2.049786 |
| O       | -1.615694 | -2.706496 | -2.696595 |



|   |           |           |           |
|---|-----------|-----------|-----------|
| O | 1.373922  | -0.873450 | -1.566826 |
| O | -0.635849 | -3.451430 | -0.814737 |
| O | 0.975271  | 0.377313  | -3.393365 |
| C | 0.692766  | -3.253261 | -2.838234 |
| C | 0.922921  | -1.972933 | -3.656389 |
| C | -0.584011 | -3.150618 | -1.995313 |
| C | 1.099194  | -0.724146 | -2.787522 |
| H | 0.534005  | -4.087958 | -3.529074 |
| H | 0.106101  | -1.795319 | -4.355543 |
| H | 1.834217  | -2.104617 | -4.248200 |
| H | 1.942943  | -2.817225 | -1.469129 |
| H | -2.417015 | -2.605207 | -2.105213 |
| H | 0.822581  | -0.786928 | 0.105711  |
| O | 0.447159  | -1.949216 | 3.541979  |
| O | 2.416448  | 0.225710  | 1.509090  |
| O | -1.373424 | 0.094850  | 3.370206  |
| O | 0.595683  | -1.002126 | 1.043603  |
| O | -0.792183 | 2.161266  | 4.054194  |
| C | 1.268713  | -0.825912 | 3.342556  |
| C | 0.845265  | 0.402521  | 4.176484  |
| C | 1.475891  | -0.468524 | 1.864115  |
| C | -0.515528 | 1.005781  | 3.860218  |
| H | 2.263941  | -1.115329 | 3.691035  |
| H | 1.580417  | 1.202418  | 4.083379  |
| H | 0.828136  | 0.089086  | 5.225412  |
| H | -0.447024 | -1.687335 | 3.279728  |
| H | 4.624898  | 1.099500  | -0.245578 |
| H | -2.191543 | 0.534282  | 3.006590  |
| C | -2.949747 | 1.064356  | -2.490401 |
| N | -3.717594 | 2.109286  | -1.756606 |
| C | -4.906427 | 2.616213  | -2.485813 |
| H | -3.564916 | 0.170242  | -2.576407 |
| H | -2.052782 | 0.827964  | -1.921270 |
| H | -2.666550 | 1.435098  | -3.475249 |
| H | -3.083480 | 2.897785  | -1.537831 |
| H | -5.579856 | 1.784816  | -2.690670 |
| H | -4.593866 | 3.082341  | -3.420220 |
| H | -5.413317 | 3.349077  | -1.859656 |
| C | 4.385565  | 0.043057  | -2.041964 |
| N | 4.250220  | 0.153267  | -0.568767 |
| C | 4.918368  | -0.935609 | 0.195854  |
| H | 5.435939  | 0.163716  | -2.310409 |
| H | 3.782816  | 0.826311  | -2.495899 |
| H | 4.030907  | -0.934299 | -2.363186 |

|   |          |           |           |
|---|----------|-----------|-----------|
| H | 3.255628 | 0.170681  | -0.296687 |
| H | 5.953468 | -1.019267 | -0.137039 |
| H | 4.385332 | -1.877536 | 0.048713  |
| H | 4.883425 | -0.675990 | 1.251558  |
| C | 4.821515 | 2.812245  | 1.788683  |
| N | 4.966801 | 2.727556  | 0.329966  |
| C | 6.115863 | 3.480749  | -0.177420 |
| H | 5.693186 | 2.360852  | 2.272097  |
| H | 3.931978 | 2.258778  | 2.092838  |
| H | 4.738660 | 3.848973  | 2.146040  |
| H | 4.112396 | 3.071905  | -0.110394 |
| H | 7.045327 | 3.029786  | 0.182416  |
| H | 6.109569 | 4.534326  | 0.139402  |
| H | 6.121677 | 3.451819  | -1.269163 |
| C | 3.990999 | -5.000926 | 0.042498  |
| N | 3.048633 | -4.049228 | 0.624652  |
| C | 2.883588 | -4.221820 | 2.066846  |
| H | 5.006856 | -4.781408 | 0.390289  |
| H | 3.968919 | -4.908177 | -1.044587 |
| H | 3.773958 | -6.050665 | 0.305052  |
| H | 2.149115 | -4.171742 | 0.169745  |
| H | 3.800083 | -3.918044 | 2.585370  |
| H | 2.674004 | -5.265465 | 2.357981  |
| H | 2.061836 | -3.599474 | 2.425205  |

#### 4SA1MA

|   |           |           |           |
|---|-----------|-----------|-----------|
| S | -0.523242 | -1.498994 | 2.092453  |
| O | -1.636913 | -1.179354 | 2.938306  |
| O | 0.176530  | -0.421356 | 1.414474  |
| O | 0.505499  | -2.279722 | 2.974857  |
| O | -0.988006 | -2.541088 | 1.029961  |
| H | 1.321935  | -2.439424 | 2.432393  |
| H | -0.589345 | -2.355629 | 0.129607  |
| S | -3.654801 | 0.702623  | 0.559889  |
| O | -2.530892 | 0.104729  | -0.161491 |
| O | -4.922600 | 0.064226  | 0.518911  |
| O | -3.160238 | 0.953356  | 2.042686  |
| O | -3.828112 | 2.184436  | 0.090303  |
| H | -2.733818 | 0.141241  | 2.409987  |
| H | -2.957678 | 2.586349  | -0.147044 |
| S | -0.100661 | 2.519058  | -0.613485 |
| O | -1.369092 | 3.187108  | -0.668756 |
| O | 0.135019  | 1.363978  | -1.445315 |
| O | 0.995904  | 3.592891  | -0.850049 |
| O | 0.229206  | 2.109814  | 0.888232  |

|            |           |           |           |
|------------|-----------|-----------|-----------|
| H          | 1.896517  | 3.143969  | -0.814033 |
| H          | 0.043358  | 1.140692  | 1.053972  |
| S          | -0.849105 | -1.873595 | -2.526833 |
| O          | 0.007803  | -1.949506 | -1.328187 |
| O          | -0.777459 | -2.901077 | -3.497693 |
| O          | -2.329698 | -1.761771 | -2.038322 |
| O          | -0.534771 | -0.506929 | -3.230471 |
| H          | -2.460272 | -1.066869 | -1.333027 |
| H          | -0.342541 | 0.210766  | -2.577851 |
| O          | 5.134106  | 0.307595  | -1.059054 |
| O          | 3.025984  | 1.564179  | 1.564258  |
| O          | 2.624652  | -1.115409 | -0.716492 |
| O          | 3.192725  | 2.162615  | -0.602542 |
| O          | 2.442668  | -2.378743 | 1.126918  |
| C          | 4.682966  | 0.461183  | 0.255523  |
| C          | 4.309253  | -0.870725 | 0.944840  |
| C          | 3.556034  | 1.493112  | 0.344636  |
| C          | 3.033157  | -1.536462 | 0.478034  |
| H          | 5.522593  | 0.883110  | 0.818756  |
| H          | 4.224666  | -0.744213 | 2.024716  |
| H          | 5.129160  | -1.572151 | 0.763123  |
| H          | 4.371838  | 0.097149  | -1.612630 |
| H          | 2.237279  | 2.136415  | 1.552881  |
| H          | 1.754249  | -1.509327 | -0.955716 |
| 4SA1MA1DMA |           |           |           |
| S          | -1.494936 | 2.897392  | -0.239612 |
| O          | -2.886553 | 3.251037  | -0.159058 |
| O          | -0.835093 | 2.378410  | 0.932402  |
| O          | -1.292540 | 1.904171  | -1.435228 |
| O          | -0.739645 | 4.182920  | -0.742955 |
| H          | -0.919569 | 1.020792  | -1.129608 |
| H          | 0.228494  | 4.013232  | -0.687721 |
| S          | 0.217852  | -1.481049 | -1.321269 |
| O          | 1.668215  | -1.256383 | -1.533787 |
| O          | -0.388692 | -0.363448 | -0.569508 |
| O          | -0.374685 | -1.443554 | -2.784319 |
| O          | -0.093314 | -2.772364 | -0.717417 |
| H          | -1.353073 | -1.606946 | -2.710002 |
| H          | -1.321117 | 0.168554  | 1.977351  |
| S          | 4.439338  | -1.605558 | 0.486431  |
| O          | 5.491321  | -2.288210 | 1.147286  |
| O          | 4.703369  | -0.443987 | -0.349427 |
| O          | 3.653181  | -2.664797 | -0.363075 |
| O          | 3.375877  | -1.140637 | 1.583423  |

|            |           |           |           |
|------------|-----------|-----------|-----------|
| H          | 2.920525  | -2.235700 | -0.878442 |
| H          | 2.959893  | -0.295583 | 1.285969  |
| S          | 2.497888  | 1.990205  | -0.348343 |
| O          | 2.116227  | 1.093601  | 0.740451  |
| O          | 1.950327  | 3.311749  | -0.373504 |
| O          | 4.054987  | 2.153898  | -0.337759 |
| O          | 2.175832  | 1.303714  | -1.708576 |
| H          | 4.474939  | 1.253103  | -0.324340 |
| H          | 2.045069  | 0.304277  | -1.638271 |
| O          | -4.711954 | -2.141697 | 1.752896  |
| O          | -4.619969 | 1.049197  | 0.165971  |
| O          | -2.792813 | -2.890521 | -0.206385 |
| O          | -3.063167 | 0.046717  | 1.451247  |
| O          | -2.966474 | -1.777294 | -2.155959 |
| C          | -4.989169 | -1.226086 | 0.729787  |
| C          | -4.871726 | -1.840168 | -0.693361 |
| C          | -4.113273 | 0.028951  | 0.838900  |
| C          | -3.453974 | -2.161069 | -1.109391 |
| H          | -6.026727 | -0.911925 | 0.859850  |
| H          | -5.286362 | -1.163877 | -1.439222 |
| H          | -5.452974 | -2.766512 | -0.687331 |
| H          | -3.828584 | -2.497214 | 1.593431  |
| H          | -4.015961 | 1.828387  | 0.163263  |
| H          | -1.838864 | -2.985244 | -0.457605 |
| C          | -0.159043 | 0.924270  | 3.523899  |
| N          | -0.353376 | 0.062343  | 2.323391  |
| C          | -0.070284 | -1.382761 | 2.557400  |
| H          | -0.833898 | 0.588175  | 4.310009  |
| H          | -0.382123 | 1.949674  | 3.243163  |
| H          | 0.874330  | 0.839177  | 3.856905  |
| H          | 0.229038  | 0.417511  | 1.554369  |
| H          | -0.732518 | -1.744376 | 3.342775  |
| H          | 0.970190  | -1.501857 | 2.856416  |
| H          | -0.250027 | -1.924883 | 1.632842  |
| 4SA1MA2DMA |           |           |           |
| S          | -1.124176 | 2.962658  | 0.057043  |
| O          | -2.415356 | 2.687095  | 0.698366  |
| O          | 0.003014  | 2.395583  | 0.823208  |
| O          | -1.117118 | 2.217357  | -1.365668 |
| O          | -0.905860 | 4.365468  | -0.297801 |
| H          | -0.987362 | 1.248941  | -1.208698 |
| H          | 0.772601  | 4.503408  | -0.480598 |
| S          | -0.233351 | -1.567357 | -1.226042 |
| O          | 1.254504  | -1.584287 | -1.309651 |

|   |           |           |           |
|---|-----------|-----------|-----------|
| O | -0.729583 | -0.333392 | -0.609766 |
| O | -0.673565 | -1.566282 | -2.747019 |
| O | -0.759464 | -2.774564 | -0.593613 |
| H | -1.665192 | -1.654217 | -2.763724 |
| H | -2.000246 | 0.213676  | 2.003414  |
| S | 3.743937  | -3.284446 | 0.378600  |
| O | 4.468793  | -4.422329 | 0.815584  |
| O | 4.414552  | -2.209756 | -0.341823 |
| O | 2.550921  | -3.790562 | -0.500916 |
| O | 3.042561  | -2.632420 | 1.647949  |
| H | 2.043003  | -3.023009 | -0.883312 |
| H | 2.901223  | -1.667400 | 1.500186  |
| S | 3.247215  | 0.876196  | 0.186771  |
| O | 2.643460  | 0.034792  | 1.203871  |
| O | 3.348358  | 2.290614  | 0.414573  |
| O | 4.709474  | 0.387085  | -0.090063 |
| O | 2.490609  | 0.679814  | -1.164522 |
| H | 4.719732  | -0.608531 | -0.175632 |
| H | 2.002536  | -0.211840 | -1.221324 |
| O | -5.691209 | -2.002269 | 1.248270  |
| O | -4.472591 | 1.134161  | 0.032251  |
| O | -3.460629 | -2.711764 | -0.415259 |
| O | -3.645746 | -0.257439 | 1.603274  |
| O | -3.327375 | -1.681733 | -2.413686 |
| C | -5.564575 | -0.955888 | 0.326261  |
| C | -5.341809 | -1.448523 | -1.130509 |
| C | -4.457498 | 0.022171  | 0.736353  |
| C | -3.945168 | -1.960471 | -1.400806 |
| H | -6.509499 | -0.407474 | 0.339688  |
| H | -5.537484 | -0.652399 | -1.847333 |
| H | -6.054710 | -2.260190 | -1.301667 |
| H | -4.819331 | -2.407937 | 1.337594  |
| H | -3.708708 | 1.731231  | 0.267804  |
| H | -2.489794 | -2.879798 | -0.539195 |
| C | -1.265202 | 1.261709  | 3.616407  |
| N | -1.068318 | 0.388544  | 2.428049  |
| C | -0.409584 | -0.913768 | 2.717807  |
| H | -1.886040 | 0.740298  | 4.344171  |
| H | -1.759699 | 2.171661  | 3.283753  |
| H | -0.295046 | 1.499864  | 4.050460  |
| H | -0.527487 | 0.933840  | 1.726190  |
| H | -0.978502 | -1.434256 | 3.487640  |
| H | 0.608059  | -0.731923 | 3.058862  |
| H | -0.397549 | -1.505840 | 1.806109  |

|   |          |          |           |
|---|----------|----------|-----------|
| C | 1.962013 | 4.107992 | -2.131064 |
| N | 1.798582 | 4.391896 | -0.677485 |
| C | 2.555521 | 5.572028 | -0.187032 |
| H | 1.612951 | 4.968159 | -2.700933 |
| H | 1.360952 | 3.234697 | -2.374813 |
| H | 3.011616 | 3.909970 | -2.342711 |
| H | 2.103997 | 3.558202 | -0.150233 |
| H | 2.228718 | 6.458826 | -0.728957 |
| H | 3.620637 | 5.406720 | -0.343832 |
| H | 2.356587 | 5.696567 | 0.876213  |

#### 4SA1MA3DMA

|   |           |           |           |
|---|-----------|-----------|-----------|
| S | 1.667130  | 2.519182  | -0.910121 |
| O | 3.087442  | 2.168932  | -1.016884 |
| O | 0.791087  | 1.844980  | -1.855921 |
| O | 1.198398  | 1.967005  | 0.572597  |
| O | 1.443087  | 3.963056  | -0.787961 |
| H | 0.771529  | 1.060630  | 0.469815  |
| H | -0.196957 | 4.268331  | -0.501646 |
| S | 0.024374  | -1.080682 | 1.745501  |
| O | -1.592045 | -1.058122 | 1.903727  |
| O | 0.294456  | -0.469279 | 0.421019  |
| O | 0.577855  | -0.294699 | 2.833154  |
| O | 0.321675  | -2.511697 | 1.765544  |
| H | 3.065705  | 0.083540  | 2.328552  |
| H | 0.542763  | -0.456375 | -2.031453 |
| S | -4.412979 | -2.590539 | 0.365329  |
| O | -5.336870 | -3.661583 | 0.239636  |
| O | -4.787626 | -1.343203 | 1.011873  |
| O | -3.137765 | -3.156880 | 1.100227  |
| O | -3.892794 | -2.236023 | -1.089234 |
| H | -2.569805 | -2.424034 | 1.452112  |
| H | -3.522875 | -1.307364 | -1.102677 |
| S | -3.143341 | 1.313673  | -0.281898 |
| O | -2.761998 | 0.140493  | -1.114363 |
| O | -3.006861 | 2.580766  | -0.986928 |
| O | -4.707876 | 1.177897  | -0.028804 |
| O | -2.468533 | 1.292067  | 1.023359  |
| H | -4.878841 | 0.307446  | 0.405443  |
| H | -1.939361 | -0.154246 | 1.653119  |
| O | 3.562445  | -3.590632 | -2.108806 |
| O | 4.322055  | -0.118873 | -1.580524 |
| O | 2.579984  | -3.226764 | 0.578933  |
| O | 2.392557  | -1.122390 | -2.163803 |
| O | 3.620475  | -1.547623 | 1.653631  |

|            |           |           |           |
|------------|-----------|-----------|-----------|
| C          | 4.310897  | -2.498417 | -1.649716 |
| C          | 4.751235  | -2.647751 | -0.165761 |
| C          | 3.560449  | -1.172233 | -1.844581 |
| C          | 3.606655  | -2.415712 | 0.798616  |
| H          | 5.216809  | -2.458867 | -2.259637 |
| H          | 5.540459  | -1.937126 | 0.071587  |
| H          | 5.129185  | -3.666048 | -0.045697 |
| H          | 2.808406  | -3.693220 | -1.513314 |
| H          | 3.782701  | 0.719121  | -1.560729 |
| H          | 1.778804  | -2.973027 | 1.126597  |
| C          | -0.597251 | -0.266706 | -3.736445 |
| N          | -0.387384 | -0.757318 | -2.348792 |
| C          | -0.496254 | -2.234560 | -2.193776 |
| H          | 0.146302  | -0.725347 | -4.386823 |
| H          | -0.473433 | 0.813191  | -3.731406 |
| H          | -1.602010 | -0.535117 | -4.059792 |
| H          | -1.076818 | -0.302740 | -1.727568 |
| H          | 0.268628  | -2.704027 | -2.808727 |
| H          | -1.492590 | -2.555232 | -2.494359 |
| H          | -0.329534 | -2.474739 | -1.146734 |
| C          | 2.848483  | 1.492563  | 3.840682  |
| N          | 3.150898  | 1.107375  | 2.434167  |
| C          | 4.498590  | 1.523351  | 1.954341  |
| H          | 3.591891  | 1.042803  | 4.498192  |
| H          | 1.856669  | 1.120860  | 4.082748  |
| H          | 2.888166  | 2.578224  | 3.925108  |
| H          | 2.428978  | 1.506877  | 1.800595  |
| H          | 5.256659  | 1.041383  | 2.569779  |
| H          | 4.581344  | 2.606960  | 2.026493  |
| H          | 4.602231  | 1.220099  | 0.916443  |
| C          | -1.263239 | 4.500822  | 1.261354  |
| N          | -1.188254 | 4.472945  | -0.224542 |
| C          | -1.635870 | 5.722303  | -0.890372 |
| H          | -0.606723 | 5.285487  | 1.636590  |
| H          | -0.945267 | 3.529397  | 1.632247  |
| H          | -2.292399 | 4.687922  | 1.565129  |
| H          | -1.786880 | 3.685798  | -0.561107 |
| H          | -1.017456 | 6.554030  | -0.553874 |
| H          | -2.681021 | 5.907172  | -0.644458 |
| H          | -1.530382 | 5.599700  | -1.967171 |
| 4SA1MA4DMA |           |           |           |
| S          | 2.976114  | -2.056572 | -1.283895 |
| O          | 4.202828  | -1.447424 | -1.807191 |
| O          | 3.151525  | -3.107675 | -0.300767 |

|   |           |           |           |
|---|-----------|-----------|-----------|
| O | 2.008187  | -1.022930 | -0.822713 |
| O | 2.301498  | -2.703522 | -2.604364 |
| H | -0.380027 | -0.000820 | -0.178335 |
| H | 1.425834  | -3.055744 | -2.335103 |
| S | -0.890640 | 2.063589  | 0.057247  |
| O | -2.305886 | 1.739334  | 0.394040  |
| O | -0.059071 | 0.729385  | 0.406610  |
| O | -0.736001 | 2.293590  | -1.377358 |
| O | -0.307105 | 3.058735  | 0.941646  |
| H | 1.140272  | 1.772621  | -2.168085 |
| H | 2.657218  | -1.504601 | 1.493891  |
| S | -3.418742 | -1.035666 | 2.349783  |
| O | -4.300903 | -1.442207 | 3.388612  |
| O | -3.724917 | -1.392800 | 0.963097  |
| O | -3.276244 | 0.516931  | 2.442238  |
| O | -1.972627 | -1.575932 | 2.661477  |
| H | -2.792959 | 0.941121  | 1.656138  |
| H | -1.510935 | -1.927748 | 1.837626  |
| S | -1.089883 | -2.506988 | -0.760018 |
| O | -0.623586 | -2.542611 | 0.652306  |
| O | -0.316632 | -3.306325 | -1.677014 |
| O | -2.543279 | -3.193335 | -0.752969 |
| O | -1.312676 | -1.102990 | -1.182599 |
| H | -3.081960 | -2.726256 | -0.075844 |
| H | -3.143610 | -0.175470 | -1.149642 |
| O | 4.576053  | 2.059202  | 2.918954  |
| O | 5.170593  | 0.565065  | -0.299803 |
| O | 2.326173  | 3.145734  | 1.505778  |
| O | 4.034678  | -0.207822 | 1.488540  |
| O | 2.638649  | 3.133513  | -0.719391 |
| C | 5.037736  | 1.991426  | 1.596121  |
| C | 4.569587  | 3.187488  | 0.727487  |
| C | 4.685532  | 0.650078  | 0.930065  |
| C | 3.087918  | 3.159409  | 0.406223  |
| H | 6.129770  | 2.034966  | 1.645663  |
| H | 5.115308  | 3.204229  | -0.213587 |
| H | 4.790950  | 4.097909  | 1.290662  |
| H | 3.621394  | 2.204834  | 2.885605  |
| H | 4.867624  | -0.263468 | -0.767407 |
| H | 1.361915  | 3.122296  | 1.256876  |
| C | 2.325693  | -3.163235 | 2.687952  |
| N | 1.875011  | -1.905608 | 2.031913  |
| C | 1.379111  | -0.862229 | 2.974061  |
| H | 3.131201  | -2.925192 | 3.381470  |



|        |           |           |           |
|--------|-----------|-----------|-----------|
| H      | 2.682739  | -3.833509 | 1.910764  |
| H      | 1.485854  | -3.603432 | 3.224422  |
| H      | 1.142941  | -2.127474 | 1.340732  |
| H      | 2.202173  | -0.569251 | 3.622873  |
| H      | 0.549381  | -1.264324 | 3.553319  |
| H      | 1.042445  | -0.010639 | 2.387788  |
| C      | 0.711550  | 0.285733  | -3.549812 |
| N      | 1.635153  | 0.989262  | -2.617385 |
| C      | 2.898003  | 1.448024  | -3.262534 |
| H      | 0.383073  | 0.981110  | -4.322059 |
| H      | -0.134033 | -0.085450 | -2.976679 |
| H      | 1.244800  | -0.554164 | -3.992102 |
| H      | 1.861214  | 0.307879  | -1.847022 |
| H      | 2.652400  | 2.081246  | -4.115411 |
| H      | 3.456499  | 0.570466  | -3.583081 |
| H      | 3.464389  | 2.014158  | -2.530035 |
| C      | -3.305501 | 0.738944  | -2.979148 |
| N      | -3.907821 | 0.183753  | -1.737503 |
| C      | -4.895487 | -0.901874 | -1.973125 |
| H      | -2.824630 | -0.066529 | -3.532183 |
| H      | -2.565241 | 1.484873  | -2.692895 |
| H      | -4.093148 | 1.188203  | -3.584336 |
| H      | -4.378969 | 0.986031  | -1.203626 |
| H      | -4.402447 | -1.740553 | -2.462811 |
| H      | -5.699914 | -0.519784 | -2.601523 |
| H      | -5.288406 | -1.222266 | -1.010787 |
| C      | -6.094513 | 2.074344  | 0.606277  |
| N      | -5.081209 | 2.383833  | -0.412888 |
| C      | -5.471611 | 3.504628  | -1.276860 |
| H      | -6.369859 | 2.953138  | 1.205201  |
| H      | -5.711798 | 1.307030  | 1.279558  |
| H      | -7.000188 | 1.696838  | 0.123456  |
| H      | -4.202505 | 2.611573  | 0.050438  |
| H      | -5.733485 | 4.406316  | -0.706191 |
| H      | -6.341112 | 3.224255  | -1.878384 |
| H      | -4.649876 | 3.753362  | -1.951455 |
| 4SA2MA |           |           |           |
| S      | -2.688578 | 2.058471  | -1.443048 |
| O      | -2.745639 | 2.399142  | -0.050567 |
| O      | -3.903202 | 1.676200  | -2.125739 |
| O      | -2.043552 | 3.227217  | -2.257813 |
| O      | -1.592412 | 0.936584  | -1.693855 |
| H      | -1.293044 | 3.615289  | -1.727556 |
| H      | -1.949177 | 0.057405  | -1.411557 |

|   |           |           |           |
|---|-----------|-----------|-----------|
| S | -4.212231 | -1.667941 | -1.036454 |
| O | -2.753301 | -1.486830 | -1.150075 |
| O | -4.701929 | -2.999725 | -1.072660 |
| O | -4.693601 | -0.863058 | 0.221168  |
| O | -4.913882 | -0.842543 | -2.158658 |
| H | -4.112428 | -0.982748 | 1.021640  |
| H | -4.601301 | 0.101990  | -2.167149 |
| S | 0.197344  | -3.203816 | 0.142418  |
| O | 1.247372  | -4.165143 | -0.082586 |
| O | -0.672779 | -3.354985 | 1.284236  |
| O | 0.810408  | -1.770232 | 0.238213  |
| O | -0.656699 | -3.196103 | -1.169966 |
| H | 1.739807  | -1.726702 | -0.164043 |
| H | -1.478365 | -2.642114 | -1.088176 |
| O | 6.116649  | -1.940710 | 0.617520  |
| O | 3.941267  | -3.725438 | -0.495465 |
| O | 5.129383  | 0.674715  | 0.317510  |
| O | 3.225648  | -1.594222 | -0.593986 |
| O | 4.365696  | 1.217116  | -1.725471 |
| C | 5.594788  | -2.016782 | -0.695553 |
| C | 5.768485  | -0.719889 | -1.503980 |
| C | 4.122948  | -2.432181 | -0.606858 |
| C | 4.999422  | 0.477443  | -0.990744 |
| H | 6.141701  | -2.819205 | -1.192499 |
| H | 5.477768  | -0.868768 | -2.544291 |
| H | 6.833018  | -0.466245 | -1.480410 |
| H | 5.793922  | -1.118267 | 1.012026  |
| H | 2.985821  | -3.938890 | -0.363711 |
| H | 4.592332  | 1.461455  | 0.611110  |
| S | -1.909968 | -0.392674 | 2.580024  |
| O | -1.739973 | 0.798666  | 3.372192  |
| O | -3.217517 | -0.990163 | 2.452336  |
| O | -1.420235 | -0.156299 | 1.118713  |
| O | -0.903069 | -1.440220 | 3.169942  |
| H | -0.679771 | 0.528900  | 1.059341  |
| H | -0.833126 | -2.222751 | 2.561384  |
| O | 0.148618  | 4.009592  | -0.902935 |
| O | -0.753665 | 3.168590  | 2.327074  |
| O | 2.725320  | 3.115229  | -0.981617 |
| O | 0.245425  | 1.787608  | 0.847053  |
| O | 3.613829  | 2.784762  | 1.057340  |
| C | 0.394305  | 4.153642  | 0.491955  |
| C | 1.882610  | 4.444203  | 0.790012  |
| C | -0.060397 | 2.901737  | 1.246649  |

|   |           |          |           |
|---|-----------|----------|-----------|
| C | 2.830481  | 3.355845 | 0.320836  |
| H | -0.205040 | 4.996612 | 0.833024  |
| H | 2.027990  | 4.584962 | 1.861008  |
| H | 2.148420  | 5.370952 | 0.273921  |
| H | 0.876367  | 3.492181 | -1.287710 |
| H | -1.071061 | 2.342255 | 2.767451  |
| H | 3.359951  | 2.386970 | -1.269977 |

#### 4SA2MA1DMA

|   |           |           |           |
|---|-----------|-----------|-----------|
| S | -4.481422 | -3.056943 | -0.540299 |
| O | -5.387380 | -4.130034 | -0.344692 |
| O | -4.766682 | -1.978953 | 0.576491  |
| O | -3.047732 | -3.312255 | -0.570031 |
| O | -4.874035 | -2.324454 | -1.885513 |
| H | -1.623365 | -2.898165 | -1.487424 |
| H | -4.208508 | -1.613714 | -2.082154 |
| S | -2.413375 | 0.342879  | -1.137222 |
| O | -2.893057 | -0.548093 | -2.195042 |
| O | -0.978982 | 0.064107  | -0.845792 |
| O | -2.515170 | 1.813015  | -1.645589 |
| O | -3.257782 | 0.271253  | 0.073624  |
| H | -1.617267 | 2.248512  | -1.775778 |
| H | -4.185760 | -1.185524 | 0.462656  |
| O | 1.919401  | 3.523230  | -3.602233 |
| O | 0.662643  | 3.801215  | -0.264245 |
| O | 4.677558  | 1.718418  | -1.409874 |
| O | -0.241217 | 2.963535  | -2.158971 |
| O | 2.470261  | 1.335931  | -1.539264 |
| C | 1.911482  | 3.986716  | -2.274630 |
| C | 3.219932  | 3.602632  | -1.576671 |
| C | 0.662322  | 3.511358  | -1.539134 |
| C | 3.528175  | 2.125502  | -1.516129 |
| H | 1.849958  | 5.086143  | -2.255500 |
| H | 3.210560  | 3.970549  | -0.546098 |
| H | 4.056476  | 4.082710  | -2.085163 |
| H | 1.046795  | 3.137766  | -3.764163 |
| H | -0.154918 | 3.487579  | 0.207033  |
| H | 2.746594  | 0.385910  | -1.463977 |
| S | 0.402047  | -0.302949 | 2.416897  |
| O | 0.420686  | -1.724788 | 2.109921  |
| O | -0.758890 | 0.194762  | 3.100254  |
| O | 1.656668  | 0.073136  | 3.252930  |
| O | 0.688861  | 0.510570  | 1.110168  |
| H | 2.468300  | -0.406630 | 2.897933  |
| H | -0.039115 | 0.403948  | 0.423658  |

|            |           |           |           |
|------------|-----------|-----------|-----------|
| O          | 6.110930  | -2.355484 | 1.585164  |
| O          | 2.657096  | -3.205093 | 1.774281  |
| O          | 5.404140  | -0.711267 | -0.790802 |
| O          | 3.686024  | -1.251388 | 2.237298  |
| O          | 3.279267  | -1.265668 | -1.273772 |
| C          | 4.944075  | -2.985980 | 1.150640  |
| C          | 4.762228  | -2.949978 | -0.399931 |
| C          | 3.696584  | -2.393168 | 1.802742  |
| C          | 4.406281  | -1.563904 | -0.886626 |
| H          | 5.019334  | -4.033763 | 1.447363  |
| H          | 3.974470  | -3.640056 | -0.698429 |
| H          | 5.713443  | -3.261932 | -0.833989 |
| H          | 6.056800  | -1.417696 | 1.360731  |
| H          | 1.833838  | -2.724289 | 2.042070  |
| H          | 5.120494  | 0.217743  | -1.066390 |
| S          | -2.430060 | 3.187999  | 2.006407  |
| O          | -2.756717 | 4.555620  | 2.199817  |
| O          | -1.403541 | 2.795051  | 1.046117  |
| O          | -2.016848 | 2.605484  | 3.411737  |
| O          | -3.737008 | 2.403814  | 1.629991  |
| H          | -1.558352 | 1.738246  | 3.311237  |
| H          | -3.538586 | 1.625778  | 1.041947  |
| C          | 0.335402  | -3.338180 | -0.971273 |
| N          | -0.673687 | -2.585788 | -1.768882 |
| C          | -0.515468 | -2.688578 | -3.244791 |
| H          | 0.298845  | -4.389721 | -1.253337 |
| H          | 0.082682  | -3.225515 | 0.080699  |
| H          | 1.321640  | -2.917252 | -1.163842 |
| H          | -0.648426 | -1.586430 | -1.491966 |
| H          | -0.629132 | -3.729540 | -3.545167 |
| H          | 0.473836  | -2.326500 | -3.522169 |
| H          | -1.283886 | -2.075234 | -3.711106 |
| 4SA2MA2DMA |           |           |           |
| S          | -3.878416 | -2.571469 | -1.440868 |
| O          | -4.818348 | -3.425646 | -0.762255 |
| O          | -2.791862 | -2.041808 | -0.558097 |
| O          | -3.270862 | -3.087244 | -2.678814 |
| O          | -4.747793 | -1.270704 | -1.846075 |
| H          | -1.740941 | -2.434001 | -2.768165 |
| H          | -4.132852 | -0.584707 | -2.186435 |
| S          | -1.978572 | 1.177883  | -1.455390 |
| O          | -2.736348 | 0.550363  | -2.521460 |
| O          | -0.696540 | 0.427608  | -1.199061 |
| O          | -1.551324 | 2.602238  | -1.971695 |

|   |           |           |           |
|---|-----------|-----------|-----------|
| O | -2.730350 | 1.377415  | -0.209288 |
| H | -0.573656 | 2.772074  | -1.880658 |
| H | -3.016932 | -0.465522 | 2.157995  |
| O | 3.404333  | 3.183600  | -3.253627 |
| O | 1.930575  | 3.761636  | -0.045305 |
| O | 5.385665  | 0.790515  | -0.687442 |
| O | 1.043050  | 3.141946  | -2.028974 |
| O | 3.214164  | 0.943552  | -1.232444 |
| C | 3.377188  | 3.638433  | -1.923131 |
| C | 4.482837  | 2.961750  | -1.106579 |
| C | 1.984326  | 3.470573  | -1.321823 |
| C | 4.407036  | 1.456617  | -1.001724 |
| H | 3.573482  | 4.721397  | -1.890232 |
| H | 4.484388  | 3.354184  | -0.085281 |
| H | 5.453146  | 3.202591  | -1.543313 |
| H | 2.487649  | 2.980670  | -3.488967 |
| H | 1.017488  | 3.656824  | 0.328788  |
| H | 3.239816  | -0.046094 | -1.146839 |
| S | -0.102346 | -0.370758 | 2.158604  |
| O | -0.387929 | -1.775065 | 1.898846  |
| O | -1.236472 | 0.386755  | 2.661815  |
| O | 1.033104  | -0.246511 | 3.212817  |
| O | 0.534728  | 0.296879  | 0.933381  |
| H | 1.774840  | -0.893400 | 2.986089  |
| H | -0.070698 | 0.373260  | 0.061449  |
| O | 5.077640  | -3.579336 | 2.308694  |
| O | 1.582352  | -3.619369 | 1.633999  |
| O | 5.366992  | -1.743004 | -0.027748 |
| O | 2.863704  | -1.978098 | 2.506097  |
| O | 3.335906  | -1.752125 | -0.990771 |
| C | 3.943004  | -3.906325 | 1.563221  |
| C | 4.153856  | -3.773203 | 0.023390  |
| C | 2.731446  | -3.069828 | 1.971366  |
| C | 4.247562  | -2.326681 | -0.403466 |
| H | 3.717092  | -4.953551 | 1.772807  |
| H | 3.323553  | -4.238514 | -0.505803 |
| H | 5.084710  | -4.291155 | -0.212563 |
| H | 5.288357  | -2.649017 | 2.158255  |
| H | 0.830129  | -2.993446 | 1.788738  |
| H | 5.377748  | -0.771341 | -0.301530 |
| S | -1.490023 | 3.898586  | 1.864919  |
| O | -1.476022 | 5.274106  | 2.215852  |
| O | -0.463101 | 3.333594  | 1.001011  |
| O | -1.471963 | 3.078823  | 3.220896  |

|   |           |           |           |
|---|-----------|-----------|-----------|
| O | -2.877292 | 3.548441  | 1.226265  |
| H | -1.318359 | 2.123132  | 3.039368  |
| H | -2.799154 | 2.753686  | 0.616117  |
| C | 0.085410  | -3.030831 | -1.991098 |
| N | -0.762774 | -2.043875 | -2.710997 |
| C | -0.288327 | -1.671764 | -4.067466 |
| H | 0.121433  | -3.953647 | -2.569673 |
| H | -0.382789 | -3.218450 | -1.027036 |
| H | 1.088355  | -2.626332 | -1.853730 |
| H | -0.833682 | -1.190423 | -2.133819 |
| H | -0.274314 | -2.559643 | -4.698936 |
| H | 0.712341  | -1.245841 | -3.999015 |
| H | -0.977313 | -0.935755 | -4.478296 |
| C | -3.848989 | -2.324260 | 2.565004  |
| N | -3.710578 | -1.093495 | 1.739206  |
| C | -4.989165 | -0.367042 | 1.496643  |
| H | -4.304566 | -2.077083 | 3.523897  |
| H | -2.856207 | -2.743965 | 2.715540  |
| H | -4.467777 | -3.031895 | 2.015038  |
| H | -3.307377 | -1.397871 | 0.800454  |
| H | -5.419176 | -0.059469 | 2.450003  |
| H | -5.667662 | -1.034273 | 0.968261  |
| H | -4.773064 | 0.498195  | 0.874812  |

#### 4SA2MA3DMA

|   |           |           |           |
|---|-----------|-----------|-----------|
| S | 1.646300  | -1.673007 | -1.788345 |
| O | 2.985692  | -1.558593 | -2.291660 |
| O | 0.630347  | -2.273699 | -2.607821 |
| O | 1.635429  | -2.491975 | -0.434401 |
| O | 1.235552  | -0.223271 | -1.344068 |
| H | 2.281350  | -2.088872 | 0.230408  |
| H | 0.379997  | -0.210849 | -0.805977 |
| S | -2.582532 | -3.984100 | -1.479912 |
| O | -3.897221 | -4.409978 | -1.886639 |
| O | -2.578703 | -2.960588 | -0.396031 |
| O | -1.611728 | -5.040539 | -1.140022 |
| O | -2.004064 | -3.225826 | -2.788973 |
| H | -0.889728 | -4.587349 | 0.286618  |
| H | -1.065289 | -2.989025 | -2.648053 |
| S | -1.052981 | -0.373329 | 1.539518  |
| O | -2.441854 | -0.392280 | 1.982362  |
| O | -0.272556 | -1.554049 | 1.985961  |
| O | -0.919220 | -0.136105 | 0.094458  |
| O | -0.418536 | 0.877268  | 2.299089  |
| H | -3.395196 | -1.529814 | -0.618552 |

|   |           |           |           |
|---|-----------|-----------|-----------|
| H | 0.562595  | 0.875946  | 2.162995  |
| O | -5.289730 | 4.153492  | 0.144366  |
| O | -3.576354 | 1.973591  | 2.404864  |
| O | -2.334737 | 3.330929  | -0.200852 |
| O | -4.737728 | 1.573909  | 0.512277  |
| O | -1.359021 | 5.290711  | 0.294524  |
| C | -4.603788 | 3.823106  | 1.328533  |
| C | -3.343175 | 4.684102  | 1.483160  |
| C | -4.302429 | 2.326746  | 1.370148  |
| C | -2.254757 | 4.471012  | 0.454179  |
| H | -5.243699 | 4.029496  | 2.199234  |
| H | -2.886745 | 4.499259  | 2.460287  |
| H | -3.621208 | 5.738642  | 1.451618  |
| H | -5.425634 | 3.318362  | -0.325402 |
| H | -3.246701 | 1.038227  | 2.314448  |
| H | -1.558475 | 3.217838  | -0.822111 |
| S | 3.013335  | -0.555186 | 2.359072  |
| O | 3.334644  | -1.510254 | 1.247176  |
| O | 4.178118  | -0.203326 | 3.121643  |
| O | 2.230684  | 0.589774  | 1.822366  |
| O | 2.028848  | -1.326988 | 3.333566  |
| H | 2.619343  | 1.798206  | 0.663346  |
| H | 1.136592  | -1.417212 | 2.900663  |
| O | 3.561625  | 4.857114  | -1.443922 |
| O | 4.392187  | 1.696658  | -0.970174 |
| O | 0.795076  | 4.900775  | -1.170066 |
| O | 2.550900  | 2.544438  | 0.013216  |
| O | -0.263454 | 3.031824  | -1.827494 |
| C | 3.294230  | 3.584508  | -1.993587 |
| C | 1.927459  | 3.485365  | -2.707582 |
| C | 3.469216  | 2.494269  | -0.929668 |
| C | 0.712502  | 3.765031  | -1.850074 |
| H | 4.073607  | 3.396877  | -2.732637 |
| H | 1.799014  | 2.496363  | -3.148779 |
| H | 1.934516  | 4.227277  | -3.512571 |
| H | 2.765138  | 5.151400  | -0.980130 |
| H | 5.123141  | 0.266471  | -0.392857 |
| H | -0.030969 | 5.052869  | -0.615268 |
| C | -3.409561 | -0.135549 | -2.155348 |
| N | -4.027124 | -0.756476 | -0.950324 |
| C | -5.368430 | -1.355452 | -1.192436 |
| H | -3.267254 | -0.906252 | -2.911000 |
| H | -2.446018 | 0.275619  | -1.863519 |
| H | -4.061289 | 0.655877  | -2.524048 |

|            |           |           |           |
|------------|-----------|-----------|-----------|
| H          | -4.107513 | -0.041651 | -0.212459 |
| H          | -5.262923 | -2.184313 | -1.890536 |
| H          | -6.039746 | -0.592053 | -1.584170 |
| H          | -5.751148 | -1.734627 | -0.246166 |
| C          | 6.069224  | -1.358561 | -1.274446 |
| N          | 5.602202  | -0.603330 | -0.078764 |
| C          | 6.672970  | -0.244491 | 0.892840  |
| H          | 6.791519  | -0.749127 | -1.816798 |
| H          | 5.206015  | -1.569359 | -1.902183 |
| H          | 6.538377  | -2.286910 | -0.949091 |
| H          | 4.853539  | -1.129503 | 0.415783  |
| H          | 7.379454  | 0.429738  | 0.409883  |
| H          | 7.182828  | -1.152924 | 1.212250  |
| H          | 6.210697  | 0.232719  | 1.754710  |
| C          | -1.625675 | -4.595059 | 2.222566  |
| N          | -0.547562 | -4.298622 | 1.241630  |
| C          | 0.751392  | -4.955503 | 1.532641  |
| H          | -1.828705 | -5.665446 | 2.212621  |
| H          | -2.509700 | -4.043428 | 1.912511  |
| H          | -1.309896 | -4.275848 | 3.215086  |
| H          | -0.424366 | -3.274013 | 1.215975  |
| H          | 0.604594  | -6.034647 | 1.568089  |
| H          | 1.133890  | -4.599373 | 2.489284  |
| H          | 1.448794  | -4.700888 | 0.737887  |
| 4SA2MA4DMA |           |           |           |
| S          | -1.229012 | 1.527261  | -1.857296 |
| O          | -2.534052 | 1.309117  | -2.424688 |
| O          | -0.244073 | 2.234932  | -2.628623 |
| O          | -1.351097 | 2.309863  | -0.493513 |
| O          | -0.714021 | 0.109468  | -1.430326 |
| H          | -1.985622 | 1.824787  | 0.142138  |
| H          | 0.093072  | 0.145031  | -0.818060 |
| S          | 2.825427  | 4.091499  | -1.348798 |
| O          | 4.138788  | 4.578238  | -1.685998 |
| O          | 2.814079  | 3.039559  | -0.293029 |
| O          | 1.799767  | 5.100133  | -1.024352 |
| O          | 2.334963  | 3.348294  | -2.702154 |
| H          | 1.045313  | 4.571295  | 0.363918  |
| H          | 1.407290  | 3.054616  | -2.601909 |
| S          | 1.379578  | 0.365676  | 1.609679  |
| O          | 2.749791  | 0.472200  | 2.097977  |
| O          | 0.514938  | 1.501763  | 2.011510  |
| O          | 1.314942  | 0.108663  | 0.161910  |
| O          | 0.796533  | -0.911464 | 2.360425  |



|   |           |           |           |
|---|-----------|-----------|-----------|
| H | 3.730708  | 1.662457  | -0.480806 |
| H | -0.184734 | -0.957179 | 2.220369  |
| O | 5.890656  | -3.899042 | 0.288023  |
| O | 3.980877  | -1.849416 | 2.513494  |
| O | 2.925305  | -3.169256 | -0.197695 |
| O | 5.209800  | -1.356197 | 0.687040  |
| O | 2.016701  | -5.190847 | 0.154950  |
| C | 5.124957  | -3.630556 | 1.438685  |
| C | 3.890141  | -4.540738 | 1.494392  |
| C | 4.765516  | -2.147692 | 1.504876  |
| C | 2.859695  | -4.338826 | 0.404780  |
| H | 5.720931  | -3.840728 | 2.338989  |
| H | 3.368246  | -4.394783 | 2.445047  |
| H | 4.208591  | -5.583452 | 1.456671  |
| H | 6.013502  | -3.046496 | -0.153317 |
| H | 3.616476  | -0.925969 | 2.430746  |
| H | 2.176659  | -3.060663 | -0.854223 |
| S | -2.739103 | 0.314848  | 2.226020  |
| O | -3.026720 | 1.154777  | 1.032747  |
| O | -3.931908 | -0.050514 | 2.946733  |
| O | -1.847138 | -0.817887 | 1.863191  |
| O | -1.880741 | 1.218426  | 3.221449  |
| H | -2.064889 | -1.988444 | 0.640511  |
| H | -0.965172 | 1.322568  | 2.853417  |
| O | -2.853520 | -4.823619 | -1.772817 |
| O | -3.714400 | -1.682723 | -1.035587 |
| O | -0.085988 | -4.805950 | -1.405853 |
| O | -1.950098 | -2.679062 | -0.062274 |
| O | 0.929304  | -2.864110 | -1.897062 |
| C | -2.604110 | -3.498752 | -2.194802 |
| C | -1.224010 | -3.309641 | -2.864901 |
| C | -2.821839 | -2.509454 | -1.042547 |
| C | -0.023664 | -3.621687 | -1.999150 |
| H | -3.368602 | -3.264063 | -2.936127 |
| H | -1.112870 | -2.285076 | -3.220861 |
| H | -1.190577 | -3.986058 | -3.725183 |
| H | -2.074544 | -5.127305 | -1.286629 |
| H | -4.217521 | 0.442323  | -0.961244 |
| H | 0.719908  | -4.961476 | -0.825802 |
| C | 3.843596  | 0.285253  | -2.025163 |
| N | 4.406253  | 0.923021  | -0.802086 |
| C | 5.723744  | 1.584407  | -1.010088 |
| H | 3.679669  | 1.056500  | -2.776040 |
| H | 2.895755  | -0.175982 | -1.757695 |

|        |           |           |           |
|--------|-----------|-----------|-----------|
| H      | 4.540347  | -0.469383 | -2.388712 |
| H      | 4.504494  | 0.207529  | -0.066723 |
| H      | 5.596721  | 2.412950  | -1.704918 |
| H      | 6.437412  | 0.854969  | -1.391558 |
| H      | 6.067959  | 1.972904  | -0.052881 |
| C      | -5.201536 | 2.262459  | -0.937936 |
| N      | -5.181515 | 0.781218  | -1.051870 |
| C      | -5.736075 | 0.270459  | -2.331482 |
| H      | -4.600848 | 2.687840  | -1.739344 |
| H      | -4.776261 | 2.531752  | 0.025955  |
| H      | -6.232736 | 2.609129  | -1.010146 |
| H      | -5.708827 | 0.355742  | -0.214455 |
| H      | -5.155953 | 0.681820  | -3.156316 |
| H      | -6.779942 | 0.573892  | -2.415769 |
| H      | -5.648329 | -0.812752 | -2.329375 |
| C      | 1.698660  | 4.586314  | 2.329107  |
| N      | 0.681902  | 4.245834  | 1.298335  |
| C      | -0.665296 | 4.817707  | 1.544337  |
| H      | 1.841122  | 5.666351  | 2.343641  |
| H      | 2.624947  | 4.090016  | 2.050452  |
| H      | 1.359727  | 4.232141  | 3.301836  |
| H      | 0.620790  | 3.215913  | 1.253869  |
| H      | -0.586646 | 5.902848  | 1.605049  |
| H      | -1.065991 | 4.419074  | 2.476433  |
| H      | -1.311165 | 4.536584  | 0.715490  |
| C      | -7.586379 | 0.409265  | 1.775774  |
| N      | -6.436085 | -0.309745 | 1.214478  |
| C      | -6.701952 | -1.744463 | 1.031940  |
| H      | -8.416166 | 0.398973  | 1.062884  |
| H      | -7.311506 | 1.447963  | 1.970430  |
| H      | -7.943314 | -0.032977 | 2.716165  |
| H      | -5.648831 | -0.213236 | 1.858907  |
| H      | -7.510751 | -1.880992 | 0.308047  |
| H      | -6.995891 | -2.238898 | 1.967511  |
| H      | -5.806274 | -2.230006 | 0.643185  |
| 4SA3MA |           |           |           |
| S      | 2.736965  | 4.318756  | 1.859865  |
| O      | 3.498252  | 3.076785  | 1.897163  |
| O      | 3.141212  | 5.431018  | 2.641777  |
| O      | 2.598544  | 4.738983  | 0.335542  |
| O      | 1.248970  | 3.997266  | 2.244775  |
| H      | 3.152096  | 4.157990  | -0.235638 |
| H      | 0.896804  | 3.255770  | 1.695986  |
| S      | 0.335882  | 0.853323  | 0.099578  |

|   |           |           |           |
|---|-----------|-----------|-----------|
| O | 0.879558  | -0.020134 | 1.087817  |
| O | 0.123884  | 2.257456  | 0.485026  |
| O | 1.216656  | 0.836085  | -1.205965 |
| O | -0.991015 | 0.305435  | -0.464166 |
| H | 2.179016  | 0.825513  | -0.976761 |
| H | -1.706319 | 1.026372  | -0.597115 |
| O | -4.849471 | 3.178024  | -2.945116 |
| O | -5.744183 | 1.899321  | 0.274246  |
| O | -1.851364 | 3.978518  | -0.359839 |
| O | -5.799757 | 0.970769  | -1.783597 |
| O | -2.854383 | 2.010965  | -0.778330 |
| C | -5.248732 | 3.286965  | -1.601902 |
| C | -4.166368 | 4.020982  | -0.812671 |
| C | -5.604042 | 1.917466  | -1.033057 |
| C | -2.890648 | 3.233227  | -0.664363 |
| H | -6.174387 | 3.879527  | -1.519734 |
| H | -4.518692 | 4.254308  | 0.196817  |
| H | -3.942200 | 4.969323  | -1.303185 |
| H | -5.137140 | 2.308998  | -3.257345 |
| H | -5.919439 | 0.981160  | 0.596696  |
| H | -1.069197 | 3.413603  | -0.161469 |
| S | -7.007332 | -1.518643 | 0.264728  |
| O | -8.354948 | -1.143651 | 0.514241  |
| O | -5.951515 | -0.740174 | 0.949719  |
| O | -6.817581 | -3.017933 | 0.591835  |
| O | -6.649306 | -1.486508 | -1.267362 |
| H | -5.839050 | -3.279014 | 0.566555  |
| H | -6.340007 | -0.564392 | -1.510655 |
| O | -1.966178 | -4.911138 | 0.497375  |
| O | -3.355442 | -1.651486 | 1.009800  |
| O | 1.335350  | -3.554904 | 2.093351  |
| O | -4.301850 | -3.638815 | 0.539090  |
| O | 0.835892  | -3.496047 | -0.097315 |
| C | -1.922606 | -3.503102 | 0.483723  |
| C | -0.893473 | -3.040166 | 1.508953  |
| C | -3.313930 | -2.929632 | 0.704856  |
| C | 0.511121  | -3.398484 | 1.080322  |
| H | -1.609064 | -3.127104 | -0.503517 |
| H | -1.097385 | -3.486775 | 2.483120  |
| H | -0.917603 | -1.953009 | 1.616891  |
| H | -2.839833 | -5.178193 | 0.185091  |
| H | -4.288840 | -1.326857 | 1.048684  |
| H | 2.258472  | -3.715458 | 1.763175  |
| S | 4.921232  | 1.881815  | -0.815896 |

|   |          |           |           |
|---|----------|-----------|-----------|
| O | 4.152737 | 3.038688  | -1.194447 |
| O | 5.983455 | 1.414026  | -1.663615 |
| O | 5.535743 | 2.069507  | 0.605433  |
| O | 3.869109 | 0.712734  | -0.632834 |
| H | 4.851628 | 2.479748  | 1.211525  |
| H | 4.328976 | -0.217663 | -0.632336 |
| O | 6.407678 | -4.075728 | 0.542494  |
| O | 3.199019 | -4.139254 | -1.043079 |
| O | 6.597709 | -1.259483 | -2.185881 |
| O | 3.823221 | -3.978714 | 1.116592  |
| O | 4.900742 | -1.566016 | -0.742913 |
| C | 5.522977 | -4.331168 | -0.520348 |
| C | 5.929776 | -3.486278 | -1.730207 |
| C | 4.078150 | -4.110380 | -0.073889 |
| C | 5.768846 | -2.008264 | -1.493357 |
| H | 5.580976 | -5.387557 | -0.825118 |
| H | 5.306679 | -3.741233 | -2.593694 |
| H | 6.966424 | -3.697916 | -1.992925 |
| H | 5.862347 | -3.998706 | 1.339313  |
| H | 2.280035 | -3.932028 | -0.687839 |
| H | 6.435427 | -0.302196 | -2.021836 |

#### 4SA3MA1DMA

|   |           |           |           |
|---|-----------|-----------|-----------|
| S | -1.814032 | 5.139682  | 1.557038  |
| O | -1.793442 | 6.382390  | 2.244015  |
| O | -0.574320 | 5.073685  | 0.590349  |
| O | -1.875439 | 3.896904  | 2.311427  |
| O | -3.049547 | 5.188190  | 0.576093  |
| H | -1.384870 | 2.259538  | 2.507953  |
| H | -3.139763 | 4.339985  | 0.083812  |
| S | 0.527440  | 1.529205  | -0.457249 |
| O | -0.634991 | 0.668393  | -0.093870 |
| O | 0.601009  | 1.826163  | -1.880422 |
| O | 0.598183  | 2.693917  | 0.430101  |
| O | 1.758716  | 0.595301  | -0.081655 |
| H | -0.199490 | 4.155950  | 0.496856  |
| H | 2.547643  | 0.834253  | -0.651660 |
| O | 6.562958  | 2.516334  | -2.347694 |
| O | 5.957681  | -1.009114 | -2.124101 |
| O | 2.763298  | 1.865255  | -3.498917 |
| O | 6.643921  | 0.509539  | -0.602255 |
| O | 3.786142  | 1.075618  | -1.658931 |
| C | 6.325724  | 1.229678  | -2.860869 |
| C | 5.038273  | 1.237514  | -3.690594 |
| C | 6.300336  | 0.201212  | -1.736275 |

|   |           |           |           |
|---|-----------|-----------|-----------|
| C | 3.799064  | 1.400215  | -2.842290 |
| H | 7.149823  | 0.925679  | -3.524355 |
| H | 4.932317  | 0.297805  | -4.241697 |
| H | 5.088256  | 2.043811  | -4.423005 |
| H | 6.786936  | 2.413465  | -1.412417 |
| H | 5.879667  | -1.612148 | -1.348515 |
| H | 1.959760  | 1.897762  | -2.915886 |
| S | 6.150355  | -2.263363 | 1.408147  |
| O | 7.411809  | -2.911778 | 1.490175  |
| O | 5.378150  | -2.435968 | 0.158608  |
| O | 5.266066  | -2.719174 | 2.601260  |
| O | 6.249205  | -0.722414 | 1.670023  |
| H | 4.300967  | -2.465964 | 2.470795  |
| H | 6.442007  | -0.238045 | 0.807289  |
| O | 0.085269  | -1.963877 | 2.367466  |
| O | 2.676871  | -2.590777 | -0.018032 |
| O | -2.097638 | -4.719106 | 0.883313  |
| O | 2.712939  | -2.252310 | 2.209830  |
| O | -1.864099 | -2.864113 | -0.365630 |
| C | 0.594374  | -2.376176 | 1.108484  |
| C | 0.068833  | -3.769179 | 0.717398  |
| C | 2.113000  | -2.387625 | 1.147336  |
| C | -1.402084 | -3.730524 | 0.365874  |
| H | 0.276620  | -1.644773 | 0.362887  |
| H | 0.239677  | -4.486518 | 1.521428  |
| H | 0.595413  | -4.117837 | -0.176466 |
| H | 0.753173  | -2.203587 | 3.025993  |
| H | 3.665148  | -2.569995 | 0.051563  |
| H | -3.052759 | -4.659557 | 0.595238  |
| S | -3.813981 | 1.585660  | -0.930949 |
| O | -3.136956 | 2.850112  | -0.827124 |
| O | -5.001708 | 1.477471  | -1.744255 |
| O | -2.832508 | 0.493383  | -1.446513 |
| O | -4.163401 | 1.149442  | 0.542647  |
| H | -1.931098 | 0.558258  | -0.987674 |
| H | -4.881707 | 0.437092  | 0.525536  |
| O | -6.674461 | -3.474010 | -2.582686 |
| O | -4.289527 | -2.867728 | -1.417777 |
| O | -6.640775 | -0.693970 | -1.651937 |
| O | -4.648142 | -4.513065 | 0.080373  |
| O | -5.940076 | -0.741515 | 0.488970  |
| C | -6.512184 | -3.664520 | -1.202063 |
| C | -7.233505 | -2.578754 | -0.347679 |
| C | -5.041258 | -3.743340 | -0.783509 |

|            |           |           |           |
|------------|-----------|-----------|-----------|
| C          | -6.551268 | -1.238178 | -0.448153 |
| H          | -6.962157 | -4.627450 | -0.960911 |
| H          | -7.248408 | -2.873596 | 0.701156  |
| H          | -8.254436 | -2.504641 | -0.727591 |
| H          | -6.332755 | -2.601007 | -2.814453 |
| H          | -3.357997 | -2.861801 | -1.049065 |
| H          | -6.094623 | 0.130038  | -1.710374 |
| C          | 0.233220  | 1.303754  | 3.373514  |
| N          | -1.072441 | 1.281184  | 2.653737  |
| C          | -2.141460 | 0.497830  | 3.332255  |
| H          | 0.075864  | 1.693810  | 4.378320  |
| H          | 0.910653  | 1.949066  | 2.819263  |
| H          | 0.624575  | 0.290039  | 3.406188  |
| H          | -0.925823 | 0.906217  | 1.698651  |
| H          | -2.308992 | 0.912009  | 4.325816  |
| H          | -1.820963 | -0.540616 | 3.394834  |
| H          | -3.049983 | 0.578685  | 2.739112  |
| 4SA3MA2DMA |           |           |           |
| S          | -3.136636 | 4.956258  | 0.934534  |
| O          | -3.349570 | 6.269111  | 1.440494  |
| O          | -1.597650 | 4.832791  | 0.551162  |
| O          | -3.476404 | 3.792779  | 1.728793  |
| O          | -3.873930 | 4.873837  | -0.450977 |
| H          | -3.789093 | 1.384281  | 1.679512  |
| H          | -3.751501 | 3.977361  | -0.867928 |
| S          | 0.311432  | 1.623838  | 0.266685  |
| O          | -0.183864 | 0.415020  | -0.601123 |
| O          | 1.017226  | 2.569450  | -0.608605 |
| O          | -0.866807 | 2.228550  | 0.913111  |
| O          | 1.244539  | 1.023154  | 1.249054  |
| H          | -1.320333 | 3.886642  | 0.600741  |
| H          | 2.709673  | 1.964334  | 1.282746  |
| O          | 6.516359  | 1.930683  | -3.357621 |
| O          | 5.394649  | -1.316404 | -2.317357 |
| O          | 2.296165  | 1.724593  | -2.794128 |
| O          | 6.748562  | 0.175262  | -1.310712 |
| O          | 4.165431  | 1.931039  | -1.556769 |
| C          | 5.808516  | 0.725866  | -3.465115 |
| C          | 4.307195  | 0.935777  | -3.737793 |
| C          | 6.038681  | -0.165201 | -2.244512 |
| C          | 3.580271  | 1.587970  | -2.583403 |
| H          | 6.227811  | 0.189553  | -4.322209 |
| H          | 3.805911  | -0.008108 | -3.964606 |
| H          | 4.197934  | 1.574722  | -4.617833 |

|   |           |           |           |
|---|-----------|-----------|-----------|
| H | 6.330841  | 2.287512  | -2.480308 |
| H | 5.539715  | -1.852116 | -1.501681 |
| H | 1.818653  | 2.088863  | -1.997176 |
| S | 6.421584  | -2.238057 | 1.232576  |
| O | 7.658167  | -2.912000 | 1.416891  |
| O | 5.573699  | -2.639503 | 0.092965  |
| O | 5.578582  | -2.341848 | 2.530209  |
| O | 6.613084  | -0.678343 | 1.121089  |
| H | 4.605809  | -2.094850 | 2.360228  |
| H | 6.757548  | -0.398754 | 0.158808  |
| O | 0.379856  | -1.474072 | 2.163863  |
| O | 2.908559  | -3.274603 | 0.351267  |
| O | -1.311005 | -3.392231 | -0.361684 |
| O | 3.094549  | -1.820500 | 2.059540  |
| O | -2.142509 | -4.085898 | 1.609905  |
| C | 0.891377  | -2.350792 | 1.196162  |
| C | 0.227848  | -3.721963 | 1.395648  |
| C | 2.412945  | -2.459250 | 1.268187  |
| C | -1.202404 | -3.744521 | 0.902981  |
| H | 0.675604  | -2.002365 | 0.177537  |
| H | 0.236386  | -3.980518 | 2.454097  |
| H | 0.775346  | -4.480042 | 0.830604  |
| H | 0.727387  | -0.583246 | 1.975008  |
| H | 3.890323  | -3.206755 | 0.316686  |
| H | -2.256022 | -3.472829 | -0.674948 |
| S | -3.781861 | 1.173551  | -1.380267 |
| O | -3.319427 | 2.536599  | -1.576202 |
| O | -4.660342 | 0.645458  | -2.420832 |
| O | -2.689554 | 0.239924  | -1.032610 |
| O | -4.705172 | 1.253743  | -0.039979 |
| H | -1.176067 | 0.460700  | -0.833571 |
| H | -5.325532 | 0.472366  | -0.048143 |
| O | -6.118308 | -4.437386 | -2.465858 |
| O | -4.649580 | -4.503473 | 0.774341  |
| O | -6.085970 | -1.563398 | -2.138877 |
| O | -3.817753 | -3.731385 | -1.170897 |
| O | -6.151957 | -0.960256 | 0.029235  |
| C | -6.148808 | -4.298042 | -1.074206 |
| C | -7.024065 | -3.102841 | -0.597696 |
| C | -4.739646 | -4.163579 | -0.495015 |
| C | -6.386246 | -1.759514 | -0.868593 |
| H | -6.593456 | -5.210425 | -0.672451 |
| H | -7.217341 | -3.170491 | 0.472074  |
| H | -7.968427 | -3.169616 | -1.143406 |

|            |           |           |           |
|------------|-----------|-----------|-----------|
| H          | -5.675982 | -3.659026 | -2.830036 |
| H          | -3.718549 | -4.348941 | 1.106299  |
| H          | -5.568333 | -0.713565 | -2.266055 |
| C          | -3.258858 | 1.496764  | 3.697404  |
| N          | -3.045400 | 1.026271  | 2.300586  |
| C          | -2.960527 | -0.458031 | 2.154515  |
| H          | -4.193325 | 1.079446  | 4.071129  |
| H          | -3.308398 | 2.582048  | 3.683555  |
| H          | -2.429903 | 1.151838  | 4.314566  |
| H          | -2.188579 | 1.460584  | 1.913684  |
| H          | -3.871772 | -0.902958 | 2.552082  |
| H          | -2.086019 | -0.824842 | 2.689229  |
| H          | -2.867182 | -0.683341 | 1.095047  |
| C          | 3.220710  | 3.981819  | 1.316652  |
| N          | 3.556510  | 2.546219  | 1.099293  |
| C          | 4.697802  | 2.049077  | 1.915155  |
| H          | 2.950755  | 4.131189  | 2.361503  |
| H          | 2.380191  | 4.235123  | 0.674449  |
| H          | 4.087287  | 4.593371  | 1.067281  |
| H          | 3.752061  | 2.391083  | 0.089411  |
| H          | 4.461711  | 2.171828  | 2.971602  |
| H          | 5.592686  | 2.618922  | 1.667597  |
| H          | 4.866380  | 0.997360  | 1.695543  |
| 4SA3MA3DMA |           |           |           |
| S          | 4.308004  | 4.613581  | -1.256701 |
| O          | 4.724574  | 5.836307  | -1.854195 |
| O          | 2.801668  | 4.797874  | -0.784432 |
| O          | 4.381141  | 3.368989  | -1.996282 |
| O          | 5.107267  | 4.465787  | 0.088346  |
| H          | 4.283099  | 0.943856  | -1.775638 |
| H          | 4.848723  | 3.631080  | 0.567413  |
| S          | 0.348021  | 1.918416  | -0.332337 |
| O          | 0.669708  | 0.702771  | 0.613452  |
| O          | -0.284575 | 2.968199  | 0.471110  |
| O          | 1.616338  | 2.345995  | -0.950025 |
| O          | -0.597579 | 1.374645  | -1.336730 |
| H          | 2.349138  | 3.920641  | -0.759250 |
| H          | -2.078598 | 2.279834  | -1.322866 |
| O          | -5.528133 | 3.182878  | 3.409098  |
| O          | -4.908081 | -0.290094 | 2.820180  |
| O          | -1.507913 | 2.640559  | 2.890569  |
| O          | -6.227241 | 1.209566  | 1.764233  |
| O          | -3.271965 | 2.190916  | 1.575736  |
| C          | -5.033524 | 1.902422  | 3.723339  |



|   |           |           |           |
|---|-----------|-----------|-----------|
| C | -3.519869 | 1.967905  | 3.946050  |
| C | -5.437013 | 0.895764  | 2.646973  |
| C | -2.756635 | 2.288187  | 2.683807  |
| H | -5.489337 | 1.535545  | 4.655420  |
| H | -3.146547 | 1.012393  | 4.325758  |
| H | -3.293801 | 2.724070  | 4.700299  |
| H | -6.146938 | 3.056353  | 2.675905  |
| H | -5.185052 | -0.932638 | 2.102583  |
| H | -1.027078 | 2.758340  | 2.030705  |
| S | -6.843176 | -1.845647 | 0.200091  |
| O | -7.902867 | -2.021884 | 1.147452  |
| O | -5.476710 | -1.915558 | 0.819585  |
| O | -6.905880 | -2.660953 | -1.020233 |
| O | -6.905695 | -0.331782 | -0.391986 |
| H | -6.076365 | -2.205004 | -2.278461 |
| H | -6.754823 | 0.282038  | 0.371080  |
| O | -0.391435 | -1.322242 | -2.018164 |
| O | -3.065714 | -2.543670 | 0.042957  |
| O | 1.132642  | -3.185210 | 0.616856  |
| O | -3.122776 | -1.180070 | -1.748483 |
| O | 1.685971  | -4.311508 | -1.249944 |
| C | -0.983020 | -1.998423 | -0.937655 |
| C | -0.555513 | -3.471259 | -1.007118 |
| C | -2.510409 | -1.867879 | -0.937566 |
| C | 0.875736  | -3.691566 | -0.571432 |
| H | -0.655668 | -1.584672 | 0.024660  |
| H | -0.662777 | -3.836314 | -2.028663 |
| H | -1.186980 | -4.064256 | -0.341227 |
| H | -0.508753 | -0.365755 | -1.873836 |
| H | -4.036796 | -2.333788 | 0.181805  |
| H | 2.060768  | -3.410100 | 0.907846  |
| S | 4.401660  | 0.905265  | 1.272202  |
| O | 4.210221  | 2.340395  | 1.387160  |
| O | 5.234384  | 0.293575  | 2.305590  |
| O | 3.142254  | 0.168452  | 1.048121  |
| O | 5.246014  | 0.727192  | -0.114247 |
| H | 1.655520  | 0.616967  | 0.837907  |
| H | 5.705646  | -0.157089 | -0.080290 |
| O | 5.760028  | -4.930788 | 2.683873  |
| O | 4.123717  | -5.079085 | -0.461781 |
| O | 6.221573  | -2.143490 | 2.122029  |
| O | 3.572935  | -3.909656 | 1.382384  |
| O | 6.246672  | -1.726034 | -0.090175 |
| C | 5.747893  | -4.919731 | 1.284638  |

|            |           |           |           |
|------------|-----------|-----------|-----------|
| C          | 6.784265  | -3.933993 | 0.672628  |
| C          | 4.354738  | -4.596425 | 0.741531  |
| C          | 6.400191  | -2.483688 | 0.859738  |
| H          | 6.015340  | -5.925336 | 0.955503  |
| H          | 6.901180  | -4.113521 | -0.395478 |
| H          | 7.733813  | -4.123094 | 1.179411  |
| H          | 5.494989  | -4.051854 | 2.986662  |
| H          | 3.217017  | -4.795575 | -0.777085 |
| H          | 5.863379  | -1.208630 | 2.204457  |
| C          | 3.708858  | 1.029963  | -3.783594 |
| N          | 3.458633  | 0.706742  | -2.352328 |
| C          | 3.082539  | -0.715818 | -2.096527 |
| H          | 4.526538  | 0.408894  | -4.148150 |
| H          | 3.972980  | 2.081715  | -3.850408 |
| H          | 2.804941  | 0.819169  | -4.354399 |
| H          | 2.723754  | 1.332511  | -1.974024 |
| H          | 3.865517  | -1.362223 | -2.491130 |
| H          | 2.128220  | -0.932969 | -2.573958 |
| H          | 2.996438  | -0.850471 | -1.021170 |
| C          | -2.751410 | 4.253100  | -1.302774 |
| N          | -2.932373 | 2.802480  | -1.031614 |
| C          | -4.142520 | 2.192828  | -1.638927 |
| H          | -2.661360 | 4.413529  | -2.377014 |
| H          | -1.843068 | 4.578235  | -0.799632 |
| H          | -3.611243 | 4.800251  | -0.916960 |
| H          | -2.970326 | 2.645782  | 0.001888  |
| H          | -4.114289 | 2.336069  | -2.719462 |
| H          | -5.030161 | 2.666620  | -1.221434 |
| H          | -4.147095 | 1.130111  | -1.403165 |
| C          | -5.133920 | -2.951614 | -3.998643 |
| N          | -5.484377 | -1.837182 | -3.082169 |
| C          | -6.217058 | -0.712464 | -3.719376 |
| H          | -6.046468 | -3.363536 | -4.428089 |
| H          | -4.622954 | -3.725122 | -3.427383 |
| H          | -4.479642 | -2.586747 | -4.790224 |
| H          | -4.619248 | -1.492524 | -2.620087 |
| H          | -7.121436 | -1.099385 | -4.188015 |
| H          | -5.585262 | -0.236943 | -4.469882 |
| H          | -6.494592 | -0.007057 | -2.938220 |
| 4SA3MA4DMA |           |           |           |
| S          | -4.258237 | 4.421996  | 0.582855  |
| O          | -4.707219 | 5.723901  | 0.947050  |
| O          | -2.747312 | 4.533198  | 0.128268  |
| O          | -4.348284 | 3.338774  | 1.548351  |

|   |           |           |           |
|---|-----------|-----------|-----------|
| O | -5.021798 | 4.015913  | -0.726870 |
| H | -4.324025 | 0.751402  | 2.532644  |
| H | -4.591250 | 3.238596  | -1.194204 |
| S | -0.247039 | 1.737553  | 0.046449  |
| O | -0.359419 | 0.395520  | -0.758079 |
| O | 0.413339  | 2.743932  | -0.796586 |
| O | -1.602130 | 2.127603  | 0.456889  |
| O | 0.610316  | 1.382080  | 1.209085  |
| H | -2.303062 | 3.646031  | 0.175690  |
| H | 2.060164  | 2.341443  | 1.170990  |
| O | 5.765447  | 3.172763  | -3.367815 |
| O | 5.419977  | -0.311309 | -2.638848 |
| O | 1.795453  | 2.351224  | -3.095178 |
| O | 6.517770  | 1.354329  | -1.577869 |
| O | 3.477728  | 2.057485  | -1.637202 |
| C | 5.409096  | 1.838816  | -3.646095 |
| C | 3.914860  | 1.753358  | -3.970416 |
| C | 5.824225  | 0.925993  | -2.493496 |
| C | 3.041274  | 2.079926  | -2.783274 |
| H | 5.960335  | 1.472647  | -4.525320 |
| H | 3.654149  | 0.745488  | -4.306505 |
| H | 3.677265  | 2.437403  | -4.787082 |
| H | 6.333309  | 3.137005  | -2.584951 |
| H | 5.695470  | -0.888580 | -1.867424 |
| H | 1.246715  | 2.481883  | -2.276667 |
| S | 7.272442  | -1.552318 | 0.200148  |
| O | 8.406453  | -1.703795 | -0.661828 |
| O | 5.962232  | -1.763663 | -0.502844 |
| O | 7.307092  | -2.285214 | 1.472895  |
| O | 7.183851  | -0.005890 | 0.696029  |
| H | 6.356929  | -1.796761 | 2.634140  |
| H | 7.029485  | 0.548487  | -0.110765 |
| O | 0.642648  | -1.323747 | 1.912759  |
| O | 3.533643  | -2.482456 | 0.126880  |
| O | -0.583492 | -3.376288 | -0.734176 |
| O | 3.373115  | -1.018719 | 1.830081  |
| O | -1.201331 | -4.444510 | 1.146845  |
| C | 1.351693  | -2.003852 | 0.908315  |
| C | 1.003590  | -3.495857 | 1.008136  |
| C | 2.864853  | -1.785465 | 1.017666  |
| C | -0.381210 | -3.812379 | 0.491123  |
| H | 1.075304  | -1.645873 | -0.091288 |
| H | 1.061567  | -3.816987 | 2.048288  |
| H | 1.710538  | -4.074946 | 0.409495  |

|   |           |           |           |
|---|-----------|-----------|-----------|
| H | 0.679880  | -0.368435 | 1.721764  |
| H | 4.499777  | -2.224266 | 0.052200  |
| H | -1.484329 | -3.646804 | -1.066296 |
| S | -3.807564 | 0.667792  | -1.942384 |
| O | -3.771529 | 2.121041  | -2.022382 |
| O | -4.821224 | 0.024773  | -2.781807 |
| O | -2.486127 | 0.040644  | -2.089991 |
| O | -4.277076 | 0.379435  | -0.412135 |
| H | -1.231390 | 0.324475  | -1.297430 |
| H | -4.744000 | -0.499015 | -0.391726 |
| O | -5.122828 | -5.269178 | -2.904029 |
| O | -3.562991 | -5.305209 | 0.282597  |
| O | -5.695137 | -2.422084 | -2.467278 |
| O | -2.966514 | -4.207177 | -1.592152 |
| O | -5.443049 | -2.003535 | -0.270097 |
| C | -5.142506 | -5.205927 | -1.506445 |
| C | -6.177798 | -4.180294 | -0.955853 |
| C | -3.762025 | -4.870468 | -0.942572 |
| C | -5.748053 | -2.751137 | -1.194694 |
| H | -5.432423 | -6.194278 | -1.146058 |
| H | -6.310868 | -4.319090 | 0.116462  |
| H | -7.118445 | -4.373125 | -1.475681 |
| H | -4.799915 | -4.420790 | -3.235649 |
| H | -2.672017 | -4.992033 | 0.620046  |
| H | -5.346752 | -1.484258 | -2.596754 |
| C | -2.505908 | 1.385681  | 3.349836  |
| N | -3.280084 | 0.603417  | 2.350126  |
| C | -2.955399 | -0.849088 | 2.338828  |
| H | -2.713626 | 0.991333  | 4.345123  |
| H | -2.820202 | 2.424163  | 3.275113  |
| H | -1.444357 | 1.304688  | 3.123987  |
| H | -3.103133 | 1.001097  | 1.418385  |
| H | -3.174806 | -1.266708 | 3.321749  |
| H | -1.898945 | -0.990141 | 2.109754  |
| H | -3.568870 | -1.341897 | 1.587554  |
| C | 2.634676  | 4.336224  | 0.978715  |
| N | 2.902868  | 2.877968  | 0.870412  |
| C | 4.108137  | 2.404338  | 1.596329  |
| H | 2.479114  | 4.600532  | 2.024611  |
| H | 1.739950  | 4.556655  | 0.400244  |
| H | 3.485785  | 4.887657  | 0.579742  |
| H | 3.009429  | 2.621558  | -0.138520 |
| H | 4.013141  | 2.651702  | 2.654080  |
| H | 4.990358  | 2.886522  | 1.176662  |

|        |           |           |           |
|--------|-----------|-----------|-----------|
| H      | 4.183474  | 1.325846  | 1.469340  |
| C      | 5.323856  | -2.487363 | 4.324399  |
| N      | 5.672608  | -1.418293 | 3.355085  |
| C      | 6.260589  | -0.195275 | 3.959561  |
| H      | 6.220357  | -2.788046 | 4.865626  |
| H      | 4.930813  | -3.341276 | 3.774764  |
| H      | 4.570675  | -2.121684 | 5.022193  |
| H      | 4.827592  | -1.176209 | 2.798749  |
| H      | 7.149978  | -0.471195 | 4.525392  |
| H      | 5.532992  | 0.276902  | 4.620078  |
| H      | 6.546219  | 0.474393  | 3.150409  |
| C      | -6.921528 | 0.718729  | 1.802988  |
| N      | -5.997344 | 1.238504  | 2.821685  |
| C      | -6.533420 | 1.133951  | 4.181944  |
| H      | -7.014252 | -0.365865 | 1.903012  |
| H      | -6.519914 | 0.940245  | 0.814732  |
| H      | -7.924269 | 1.160931  | 1.884902  |
| H      | -5.801637 | 2.213538  | 2.600222  |
| H      | -6.643979 | 0.080646  | 4.455139  |
| H      | -7.516327 | 1.614419  | 4.290424  |
| H      | -5.844768 | 1.600841  | 4.889916  |
| 4SA4MA |           |           |           |
| S      | 0.910934  | -2.791311 | 3.911149  |
| O      | 1.730366  | -1.652592 | 3.523143  |
| O      | 1.254075  | -3.617033 | 5.009032  |
| O      | -0.549397 | -2.240008 | 4.154716  |
| O      | 0.758989  | -3.727573 | 2.639353  |
| H      | -0.758973 | -1.529619 | 3.504171  |
| H      | 0.683405  | -3.168223 | 1.834026  |
| S      | 4.402418  | -0.940563 | 1.334374  |
| O      | 3.368709  | -0.084309 | 0.754149  |
| O      | 5.754876  | -0.592600 | 1.070228  |
| O      | 4.231291  | -1.058800 | 2.877853  |
| O      | 4.070417  | -2.423302 | 0.892596  |
| H      | 3.310501  | -1.333850 | 3.139555  |
| H      | 3.646097  | -2.422164 | -0.001796 |
| S      | -0.213295 | -0.534970 | 0.925596  |
| O      | -1.048603 | -0.397717 | 2.120613  |
| O      | 0.343614  | -1.835639 | 0.657933  |
| O      | -1.043637 | -0.113808 | -0.305990 |
| O      | 0.894994  | 0.547235  | 1.044072  |
| H      | -1.544271 | 0.756631  | -0.118063 |
| H      | 1.838645  | 0.209337  | 0.913560  |
| O      | -3.308705 | 4.573741  | 0.180064  |

|   |           |           |           |
|---|-----------|-----------|-----------|
| O | -2.329684 | 2.033118  | 2.493598  |
| O | -0.590152 | 5.076705  | -0.022982 |
| O | -2.158400 | 2.124114  | 0.243060  |
| O | 0.628478  | 4.607106  | 1.806784  |
| C | -2.880188 | 4.078617  | 1.434773  |
| C | -1.744107 | 4.931331  | 2.048613  |
| C | -2.438961 | 2.621553  | 1.324922  |
| C | -0.440921 | 4.854768  | 1.279043  |
| H | -3.743720 | 4.108844  | 2.098115  |
| H | -1.547954 | 4.616422  | 3.072089  |
| H | -2.082420 | 5.971301  | 2.055612  |
| H | -2.522796 | 4.683318  | -0.377936 |
| H | -1.962093 | 1.123179  | 2.402851  |
| H | 0.286553  | 4.982730  | -0.504570 |
| S | 2.655972  | -1.491865 | -2.525772 |
| O | 2.712341  | -2.492879 | -1.454079 |
| O | 3.917843  | -1.053637 | -3.063551 |
| O | 1.798242  | -2.068887 | -3.666523 |
| O | 1.846647  | -0.275237 | -2.009261 |
| H | 1.047658  | -2.686510 | -3.330734 |
| H | 2.404090  | 0.592668  | -1.970484 |
| O | 3.804322  | 4.760960  | -2.921179 |
| O | 2.977497  | 4.306400  | 0.536735  |
| O | 5.239266  | 1.249122  | -2.355173 |
| O | 1.729523  | 4.848287  | -1.259256 |
| O | 3.154257  | 1.886138  | -1.793781 |
| C | 4.086714  | 4.592812  | -1.554100 |
| C | 4.986108  | 3.369641  | -1.356926 |
| C | 2.802230  | 4.563940  | -0.735358 |
| C | 4.363252  | 2.096430  | -1.867282 |
| H | 4.640241  | 5.464321  | -1.171125 |
| H | 5.202300  | 3.222248  | -0.294098 |
| H | 5.933721  | 3.530702  | -1.870482 |
| H | 2.852994  | 4.922124  | -2.992573 |
| H | 2.116928  | 4.382699  | 1.033283  |
| H | 4.807543  | 0.410627  | -2.639214 |
| O | -2.037809 | -5.563098 | -2.748032 |
| O | 0.798095  | -4.392549 | -0.942967 |
| O | -3.300119 | -3.196451 | -1.988774 |
| O | -0.066688 | -3.624402 | -2.876567 |
| O | -3.135727 | -2.590599 | 0.164767  |
| C | -1.310986 | -5.259418 | -1.595421 |
| C | -2.174599 | -4.667488 | -0.453563 |
| C | -0.125726 | -4.337002 | -1.884473 |

|   |           |           |           |
|---|-----------|-----------|-----------|
| C | -2.915467 | -3.406299 | -0.840272 |
| H | -0.883992 | -6.195343 | -1.226994 |
| H | -1.581774 | -4.487845 | 0.443297  |
| H | -2.936414 | -5.412279 | -0.201175 |
| H | -2.501396 | -4.754950 | -3.012783 |
| H | 1.507808  | -3.730948 | -1.115178 |
| H | -4.469724 | -2.022174 | -2.416944 |
| O | -7.281814 | 0.429156  | 0.399813  |
| O | -5.226793 | 3.013926  | -1.001375 |
| O | -4.584269 | -0.498419 | -0.635418 |
| O | -5.358454 | 2.170065  | 1.082990  |
| O | -5.212275 | -1.388252 | -2.599386 |
| C | -6.818153 | 1.289279  | -0.611056 |
| C | -6.405987 | 0.503448  | -1.861938 |
| C | -5.710554 | 2.192991  | -0.078527 |
| C | -5.310564 | -0.507166 | -1.622692 |
| H | -7.629997 | 1.965683  | -0.913533 |
| H | -6.069021 | 1.185902  | -2.647921 |
| H | -7.273199 | -0.030771 | -2.255428 |
| H | -6.700326 | 0.571913  | 1.160809  |
| H | -4.535135 | 3.591737  | -0.594054 |
| H | -3.654824 | -1.789263 | -0.139947 |

#### 4SA4MA1DMA

|   |           |           |           |
|---|-----------|-----------|-----------|
| S | 0.651516  | -3.400154 | 4.159874  |
| O | 2.003232  | -2.883682 | 4.037488  |
| O | 0.339202  | -4.325546 | 5.187375  |
| O | -0.356807 | -2.192029 | 4.287295  |
| O | 0.260435  | -4.063024 | 2.769626  |
| H | -0.347684 | -1.610368 | 3.483942  |
| H | 0.604344  | -3.503328 | 2.031338  |
| S | 4.016309  | -0.797154 | 1.896474  |
| O | 3.505694  | 0.167276  | 0.928185  |
| O | 5.388124  | -0.727494 | 2.261157  |
| O | 3.054822  | -0.656056 | 3.133508  |
| O | 3.740086  | -2.256693 | 1.361278  |
| H | 2.780544  | -1.525023 | 3.539622  |
| H | 2.805917  | -2.311564 | 1.041067  |
| S | 0.107553  | -1.075135 | 0.747810  |
| O | -0.501673 | -0.673738 | 2.036780  |
| O | 1.063925  | -2.184994 | 0.962271  |
| O | -0.853015 | -1.295765 | -0.312326 |
| O | 0.956158  | 0.179878  | 0.236191  |
| H | -0.028352 | 0.342539  | -1.891735 |
| H | 1.893733  | 0.187196  | 0.584731  |

|   |           |           |           |
|---|-----------|-----------|-----------|
| O | -2.439796 | 4.743909  | 0.660721  |
| O | -1.473566 | 1.783451  | 2.430005  |
| O | 0.354556  | 4.739410  | 0.397237  |
| O | -1.834573 | 2.132802  | 0.229483  |
| O | 1.557622  | 4.126044  | 2.192626  |
| C | -2.023260 | 3.976142  | 1.779347  |
| C | -0.787915 | 4.579037  | 2.481997  |
| C | -1.778379 | 2.516308  | 1.384933  |
| C | 0.497180  | 4.454865  | 1.694708  |
| H | -2.860868 | 3.975530  | 2.476649  |
| H | -0.630123 | 4.100323  | 3.446468  |
| H | -0.985372 | 5.642568  | 2.647852  |
| H | -1.682615 | 4.815547  | 0.062291  |
| H | -1.219392 | 0.852777  | 2.190392  |
| H | 1.227045  | 4.627612  | -0.082146 |
| S | 2.297681  | -1.702737 | -3.104316 |
| O | 2.192513  | -2.534185 | -1.925606 |
| O | 3.604284  | -1.508241 | -3.680788 |
| O | 1.321201  | -2.210472 | -4.191209 |
| O | 1.697511  | -0.273934 | -2.791265 |
| H | 0.519817  | -2.694148 | -3.768496 |
| H | 2.441126  | 0.369428  | -2.479326 |
| O | 4.724041  | 4.099360  | -2.544967 |
| O | 3.817090  | 3.568742  | 0.876680  |
| O | 5.348801  | 0.287738  | -2.437596 |
| O | 2.643904  | 4.332159  | -0.888932 |
| O | 3.431629  | 1.375076  | -1.984887 |
| C | 4.933376  | 3.693948  | -1.214145 |
| C | 5.501610  | 2.267249  | -1.164915 |
| C | 3.668561  | 3.875778  | -0.383919 |
| C | 4.655381  | 1.271201  | -1.910091 |
| H | 5.678751  | 4.348666  | -0.741834 |
| H | 5.573345  | 1.917357  | -0.129812 |
| H | 6.505454  | 2.261185  | -1.589534 |
| H | 3.794241  | 4.356897  | -2.611671 |
| H | 2.984448  | 3.752906  | 1.394740  |
| H | 4.771144  | -0.367056 | -2.894199 |
| O | -2.996859 | -4.862663 | -2.865499 |
| O | 0.111487  | -4.198352 | -1.238799 |
| O | -3.634543 | -2.359768 | -1.761471 |
| O | -0.723296 | -3.345308 | -3.151059 |
| O | -3.884697 | -2.386682 | 0.467389  |
| C | -2.116688 | -4.778452 | -1.781225 |
| C | -2.772201 | -4.226621 | -0.495961 |



|            |           |           |           |
|------------|-----------|-----------|-----------|
| C          | -0.835792 | -4.019386 | -2.133393 |
| C          | -3.458623 | -2.892056 | -0.662081 |
| H          | -1.792663 | -5.799072 | -1.558939 |
| H          | -2.053970 | -4.154886 | 0.322665  |
| H          | -3.542881 | -4.934648 | -0.175397 |
| H          | -3.282506 | -3.959972 | -3.061326 |
| H          | 0.892962  | -3.627620 | -1.425696 |
| H          | -4.602758 | -1.009368 | -2.044590 |
| O          | -7.331042 | 1.667756  | 1.003024  |
| O          | -4.766572 | 3.743732  | -0.430936 |
| O          | -5.220344 | -0.085031 | 0.016256  |
| O          | -4.933814 | 2.822763  | 1.619317  |
| O          | -5.151304 | -0.196603 | -2.224744 |
| C          | -6.669016 | 2.380249  | -0.005847 |
| C          | -6.442185 | 1.543266  | -1.279867 |
| C          | -5.363963 | 2.998123  | 0.504234  |
| C          | -5.544198 | 0.346699  | -1.082947 |
| H          | -7.319281 | 3.215590  | -0.284263 |
| H          | -6.038949 | 2.155902  | -2.088159 |
| H          | -7.410771 | 1.161440  | -1.618286 |
| H          | -6.662236 | 1.143048  | 1.461838  |
| H          | -3.932825 | 4.120724  | -0.057092 |
| H          | -4.349656 | -1.518455 | 0.315608  |
| C          | -0.311146 | 2.264298  | -2.586553 |
| N          | -0.824570 | 0.959061  | -2.089099 |
| C          | -1.740901 | 0.258245  | -3.033319 |
| H          | 0.223289  | 2.100225  | -3.520561 |
| H          | 0.363864  | 2.679671  | -1.841732 |
| H          | -1.153282 | 2.936198  | -2.743042 |
| H          | -1.287829 | 1.116142  | -1.178487 |
| H          | -1.219918 | 0.113990  | -3.978689 |
| H          | -2.633692 | 0.863731  | -3.180423 |
| H          | -2.005730 | -0.704274 | -2.603735 |
| 4SA4MA2DMA |           |           |           |
| S          | -0.672362 | -3.251413 | 3.434845  |
| O          | 0.535403  | -2.429757 | 3.281365  |
| O          | -0.730861 | -4.220176 | 4.467810  |
| O          | -1.880974 | -2.261636 | 3.606513  |
| O          | -0.936474 | -3.979342 | 2.067157  |
| H          | -1.811185 | -1.498732 | 2.957416  |
| H          | -0.930851 | -3.329462 | 1.309948  |
| S          | 3.656423  | -2.962516 | 1.286012  |
| O          | 3.351317  | -1.637034 | 0.789596  |
| O          | 5.002227  | -3.429672 | 1.277923  |

|   |           |           |           |
|---|-----------|-----------|-----------|
| O | 3.163009  | -3.096081 | 2.791234  |
| O | 2.694413  | -3.991624 | 0.573884  |
| H | 2.192137  | -2.955150 | 2.863920  |
| H | 2.252861  | -3.596883 | -0.231544 |
| S | -0.990431 | -0.643289 | 0.581923  |
| O | -1.465690 | -0.281147 | 1.920953  |
| O | -1.209604 | -2.044149 | 0.230562  |
| O | -1.471905 | 0.275744  | -0.472239 |
| O | 0.580996  | -0.410739 | 0.702257  |
| H | -1.219415 | 1.898405  | -0.070526 |
| H | 1.052487  | -0.632521 | -0.149643 |
| O | -0.906471 | 5.511953  | 0.038304  |
| O | -0.049788 | 2.595317  | 1.929045  |
| O | 1.855628  | 4.822895  | -0.224363 |
| O | -1.141570 | 2.889935  | -0.024759 |
| O | 2.993591  | 4.374868  | 1.662162  |
| C | -0.553292 | 4.828308  | 1.232590  |
| C | 0.781114  | 5.310758  | 1.831129  |
| C | -0.557637 | 3.303936  | 1.078309  |
| C | 1.994644  | 4.789996  | 1.096703  |
| H | -1.358573 | 5.044979  | 1.937663  |
| H | 0.867717  | 5.004115  | 2.871174  |
| H | 0.791548  | 6.403909  | 1.791224  |
| H | -0.209064 | 5.344922  | -0.610885 |
| H | 0.556385  | 0.978081  | 2.650210  |
| H | 2.676682  | 4.465255  | -0.680684 |
| S | 1.846065  | -2.104956 | -2.494394 |
| O | 1.329884  | -3.094886 | -1.524764 |
| O | 3.258650  | -2.270375 | -2.801657 |
| O | 0.968679  | -1.921035 | -3.635916 |
| O | 1.746406  | -0.682257 | -1.663928 |
| H | -0.668827 | -1.062601 | -3.479542 |
| H | 2.640940  | -0.216047 | -1.642773 |
| O | 5.822476  | 2.774659  | -3.021162 |
| O | 5.020877  | 3.098124  | 0.459017  |
| O | 5.461256  | -0.921893 | -2.097170 |
| O | 4.010588  | 3.857776  | -1.403845 |
| O | 3.967687  | 0.663123  | -1.531121 |
| C | 6.045288  | 2.618198  | -1.640794 |
| C | 6.301720  | 1.142471  | -1.314251 |
| C | 4.903873  | 3.231505  | -0.840844 |
| C | 5.122937  | 0.266476  | -1.667248 |
| H | 6.941113  | 3.181539  | -1.339462 |
| H | 6.500870  | 1.019095  | -0.245376 |

|   |           |           |           |
|---|-----------|-----------|-----------|
| H | 7.180852  | 0.801040  | -1.860162 |
| H | 5.006286  | 3.284951  | -3.115198 |
| H | 4.283634  | 3.580828  | 0.924231  |
| H | 4.659353  | -1.467644 | -2.311435 |
| O | -4.457303 | -4.255341 | -2.641953 |
| O | -1.156939 | -4.395855 | -1.377924 |
| O | -4.565221 | -1.648944 | -1.559658 |
| O | -2.021958 | -2.904287 | -2.821322 |
| O | -4.392187 | -1.511894 | 0.669179  |
| C | -3.527921 | -4.340074 | -1.589589 |
| C | -4.034032 | -3.642905 | -0.304217 |
| C | -2.156052 | -3.795021 | -2.009819 |
| C | -4.343269 | -2.172752 | -0.467301 |
| H | -3.402021 | -5.399307 | -1.360276 |
| H | -3.339952 | -3.768845 | 0.526764  |
| H | -4.972982 | -4.127261 | -0.014018 |
| H | -4.576426 | -3.313257 | -2.821398 |
| H | -0.307137 | -3.935751 | -1.573993 |
| H | -4.906443 | -0.051453 | -1.835673 |
| O | -6.299453 | 3.473079  | 1.188980  |
| O | -3.546972 | 4.858353  | -0.671348 |
| O | -5.018983 | 1.119840  | 0.190561  |
| O | -3.638757 | 4.133976  | 1.462952  |
| O | -5.118099 | 0.903916  | -2.040641 |
| C | -5.612383 | 3.946007  | 0.063667  |
| C | -5.722488 | 3.005414  | -1.153310 |
| C | -4.156626 | 4.308189  | 0.386376  |
| C | -5.239635 | 1.593290  | -0.918091 |
| H | -6.093621 | 4.886853  | -0.220889 |
| H | -5.199511 | 3.418362  | -2.017361 |
| H | -6.778778 | 2.921753  | -1.429992 |
| H | -5.812451 | 2.703300  | 1.511382  |
| H | -2.614846 | 5.077159  | -0.439435 |
| H | -4.609998 | -0.554947 | 0.511416  |
| C | -0.410763 | 0.988243  | -3.593710 |
| N | -1.255050 | -0.214605 | -3.349237 |
| C | -2.470011 | -0.288016 | -4.211254 |
| H | -0.057123 | 0.963722  | -4.623144 |
| H | 0.436113  | 0.955223  | -2.913770 |
| H | -1.008207 | 1.882547  | -3.419850 |
| H | -1.526036 | -0.222613 | -2.353766 |
| H | -2.156556 | -0.273720 | -5.254422 |
| H | -3.108747 | 0.567825  | -3.996645 |
| H | -2.980896 | -1.218052 | -3.982847 |

|   |           |           |          |
|---|-----------|-----------|----------|
| C | 2.531425  | 0.624918  | 3.168764 |
| N | 1.064448  | 0.430765  | 3.362573 |
| C | 0.557757  | 0.818898  | 4.706323 |
| H | 2.752563  | 1.689723  | 3.229549 |
| H | 2.805660  | 0.227866  | 2.193611 |
| H | 3.065047  | 0.078338  | 3.945244 |
| H | 0.826464  | -0.556756 | 3.190162 |
| H | 0.766061  | 1.874546  | 4.870854 |
| H | 1.051453  | 0.212051  | 5.463957 |
| H | -0.516413 | 0.645756  | 4.732376 |

#### 4SA4MA3DMA

|   |           |           |           |
|---|-----------|-----------|-----------|
| S | -4.225984 | -2.034289 | 1.467517  |
| O | -3.110861 | -2.152677 | 2.405708  |
| O | -5.497847 | -2.563869 | 1.808995  |
| O | -4.400914 | -0.502538 | 1.148028  |
| O | -3.781257 | -2.680114 | 0.103315  |
| H | -3.520717 | -0.071134 | 0.935898  |
| H | -2.915280 | -2.288926 | -0.202094 |
| S | -0.386275 | -4.383460 | 2.764364  |
| O | 0.168769  | -3.047419 | 2.854569  |
| O | 0.293638  | -5.468361 | 3.390946  |
| O | -1.859871 | -4.379821 | 3.334481  |
| O | -0.705392 | -4.700729 | 1.247461  |
| H | -2.372149 | -3.630498 | 2.941346  |
| H | -0.039102 | -4.316859 | 0.619526  |
| S | -1.072748 | -0.188976 | -0.116520 |
| O | -2.064097 | 0.617243  | 0.600655  |
| O | -1.636891 | -1.364823 | -0.778624 |
| O | -0.218684 | 0.604495  | -1.023287 |
| O | -0.125288 | -0.707802 | 1.060349  |
| H | 0.357352  | 2.081280  | -0.464794 |
| H | 0.634684  | -1.232901 | 0.703839  |
| O | 1.481278  | 5.460489  | 0.089944  |
| O | 0.977767  | 2.362568  | 1.833803  |
| O | 3.833940  | 3.765718  | 0.053575  |
| O | 0.719934  | 2.996498  | -0.317233 |
| O | 4.764831  | 3.254997  | 2.034473  |
| C | 1.472448  | 4.632251  | 1.247125  |
| C | 2.809857  | 4.649805  | 2.008899  |
| C | 1.021334  | 3.196581  | 0.956039  |
| C | 3.905089  | 3.820334  | 1.380219  |
| H | 0.704413  | 5.052662  | 1.897981  |
| H | 2.675723  | 4.282022  | 3.025128  |
| H | 3.154336  | 5.686764  | 2.069622  |

|   |           |           |           |
|---|-----------|-----------|-----------|
| H | 2.071518  | 5.047018  | -0.554471 |
| H | -1.344434 | 0.517075  | 3.711839  |
| H | 4.522238  | 3.133651  | -0.303658 |
| S | 2.097886  | -3.224623 | -0.944605 |
| O | 0.725230  | -3.723451 | -0.794407 |
| O | 3.120265  | -4.069789 | -0.338627 |
| O | 2.414892  | -2.765608 | -2.291356 |
| O | 2.064527  | -1.864547 | -0.015149 |
| H | 1.789444  | -1.230499 | -2.923761 |
| H | 3.006262  | -1.573546 | 0.132875  |
| O | 6.727124  | -0.042855 | -2.137665 |
| O | 6.393308  | 1.341805  | 1.149004  |
| O | 5.609074  | -3.125522 | -0.223093 |
| O | 5.535792  | 1.941200  | -0.845541 |
| O | 4.623590  | -1.122902 | 0.085150  |
| C | 7.081379  | 0.119909  | -0.782382 |
| C | 7.012161  | -1.233718 | -0.075208 |
| C | 6.230777  | 1.210734  | -0.141512 |
| C | 5.619066  | -1.825162 | -0.073219 |
| H | 8.118517  | 0.481530  | -0.694286 |
| H | 7.326431  | -1.118652 | 0.966219  |
| H | 7.697896  | -1.928022 | -0.559897 |
| H | 6.310152  | 0.784868  | -2.412736 |
| H | 5.822267  | 2.082221  | 1.502112  |
| H | 4.679983  | -3.496898 | -0.236799 |
| O | -2.480067 | -1.828890 | -5.553453 |
| O | -1.409437 | -3.625874 | -2.662319 |
| O | -2.952332 | 0.276588  | -3.761380 |
| O | -0.439303 | -1.878380 | -3.693954 |
| O | -4.358670 | -0.160326 | -2.071397 |
| C | -2.670802 | -2.539295 | -4.355884 |
| C | -3.819722 | -1.964198 | -3.498154 |
| C | -1.374082 | -2.634059 | -3.541772 |
| C | -3.651735 | -0.510465 | -3.120500 |
| H | -2.947216 | -3.559525 | -4.630624 |
| H | -3.980124 | -2.550570 | -2.592909 |
| H | -4.741532 | -2.024339 | -4.087308 |
| H | -2.320536 | -0.909604 | -5.297801 |
| H | -0.607595 | -3.607537 | -2.091667 |
| H | -2.859630 | 1.931412  | -3.499659 |
| O | -4.400450 | 4.598041  | 0.253959  |
| O | -1.149032 | 5.692038  | -0.838331 |
| O | -3.976445 | 2.455818  | -1.507340 |
| O | -1.710764 | 4.430281  | 0.943817  |

|            |           |           |           |
|------------|-----------|-----------|-----------|
| O          | -2.841072 | 2.924785  | -3.382990 |
| C          | -3.450886 | 5.194688  | -0.583922 |
| C          | -3.570581 | 4.759822  | -2.064443 |
| C          | -2.014123 | 5.035982  | -0.057554 |
| C          | -3.471568 | 3.267499  | -2.281662 |
| H          | -3.643379 | 6.272243  | -0.558125 |
| H          | -2.829118 | 5.268606  | -2.677526 |
| H          | -4.565627 | 5.052900  | -2.415538 |
| H          | -4.379233 | 3.645470  | 0.080963  |
| H          | -0.226057 | 5.584311  | -0.507570 |
| H          | -4.219540 | 0.800377  | -1.853183 |
| C          | 2.734389  | 0.533816  | -2.388634 |
| N          | 1.662040  | -0.211604 | -3.102459 |
| C          | 1.624745  | 0.038382  | -4.570679 |
| H          | 3.704450  | 0.171117  | -2.722605 |
| H          | 2.631363  | 0.352710  | -1.323931 |
| H          | 2.630869  | 1.598011  | -2.595624 |
| H          | 0.752362  | 0.010315  | -2.672933 |
| H          | 2.575761  | -0.274271 | -5.000492 |
| H          | 1.471231  | 1.103265  | -4.745279 |
| H          | 0.807373  | -0.541817 | -4.988356 |
| C          | 0.605592  | -0.119685 | 4.165326  |
| N          | -0.831570 | -0.410097 | 3.903964  |
| C          | -1.508301 | -1.136845 | 5.009736  |
| H          | 0.686215  | 0.444610  | 5.094653  |
| H          | 0.989435  | 0.471335  | 3.336793  |
| H          | 1.143446  | -1.062664 | 4.244360  |
| H          | -0.880849 | -0.972189 | 3.046519  |
| H          | -1.491531 | -0.514080 | 5.904216  |
| H          | -0.986267 | -2.073776 | 5.193118  |
| H          | -2.533403 | -1.343653 | 4.711549  |
| C          | -3.533024 | 2.147149  | 3.498869  |
| N          | -2.065323 | 2.080009  | 3.398685  |
| C          | -1.418950 | 3.184520  | 4.122042  |
| H          | -3.831414 | 2.066554  | 4.547787  |
| H          | -3.980114 | 1.316419  | 2.952382  |
| H          | -3.929368 | 3.087497  | 3.095543  |
| H          | -1.818874 | 2.160304  | 2.413250  |
| H          | -1.615135 | 3.085424  | 5.193871  |
| H          | -1.786000 | 4.164391  | 3.791873  |
| H          | -0.342276 | 3.140611  | 3.953857  |
| 4SA4MA4DMA |           |           |           |
| S          | -0.870059 | -3.831737 | 3.524321  |
| O          | 0.567507  | -3.628373 | 3.393712  |

|   |           |           |           |
|---|-----------|-----------|-----------|
| O | -1.370828 | -4.759919 | 4.475942  |
| O | -1.539065 | -2.433898 | 3.797951  |
| O | -1.424010 | -4.250679 | 2.102649  |
| H | -1.217986 | -1.761131 | 3.129643  |
| H | -1.177363 | -3.567427 | 1.408885  |
| S | 4.461354  | -2.006045 | 0.173440  |
| O | 4.075490  | -0.694466 | -0.331342 |
| O | 5.861131  | -2.300944 | 0.307073  |
| O | 3.687319  | -2.337787 | 1.431043  |
| O | 3.881641  | -3.105446 | -0.886236 |
| H | 2.863373  | -3.749209 | 1.301560  |
| H | 3.213969  | -2.693796 | -1.477857 |
| S | -0.518195 | -1.089289 | 0.527164  |
| O | -0.596943 | -0.779309 | 1.965157  |
| O | -0.813107 | -2.500895 | 0.247733  |
| O | -1.273306 | -0.165672 | -0.332956 |
| O | 1.021596  | -0.857392 | 0.226187  |
| H | -1.616618 | 1.431550  | 0.152400  |
| H | 1.219318  | -0.559209 | -0.705310 |
| O | -2.183012 | 5.044705  | 0.177077  |
| O | -0.524294 | 2.449512  | 1.988356  |
| O | 0.594435  | 5.203138  | -0.058199 |
| O | -1.860312 | 2.393861  | 0.179843  |
| O | 1.834210  | 4.992398  | 1.803698  |
| C | -1.699276 | 4.455903  | 1.380500  |
| C | -0.554690 | 5.265261  | 2.014592  |
| C | -1.290570 | 2.986378  | 1.216435  |
| C | 0.751065  | 5.138607  | 1.263515  |
| H | -2.556226 | 4.447087  | 2.058194  |
| H | -0.381563 | 4.947261  | 3.040056  |
| H | -0.848615 | 6.319163  | 2.022706  |
| H | -1.428904 | 5.139558  | -0.421967 |
| H | 1.361029  | -0.334394 | 2.460456  |
| H | 1.480256  | 5.135851  | -0.528949 |
| S | 1.943060  | -0.989527 | -3.334545 |
| O | 1.817478  | -2.267469 | -2.605586 |
| O | 3.288455  | -0.702621 | -3.801726 |
| O | 0.885134  | -0.781385 | -4.315178 |
| O | 1.626276  | 0.127410  | -2.162110 |
| H | -0.577743 | -0.058505 | -3.735962 |
| H | 2.390735  | 0.784949  | -2.075879 |
| O | 4.917696  | 4.596257  | -2.966267 |
| O | 4.065685  | 4.246771  | 0.500595  |
| O | 5.231540  | 0.865861  | -2.798592 |

|   |           |           |           |
|---|-----------|-----------|-----------|
| O | 2.912122  | 4.997993  | -1.280299 |
| O | 3.481134  | 1.919681  | -1.853776 |
| C | 5.159197  | 4.251495  | -1.623079 |
| C | 5.677802  | 2.809906  | -1.535512 |
| C | 3.919847  | 4.509815  | -0.777084 |
| C | 4.684793  | 1.814227  | -2.086800 |
| H | 5.936592  | 4.907232  | -1.205364 |
| H | 5.877735  | 2.536909  | -0.495081 |
| H | 6.611901  | 2.734414  | -2.090942 |
| H | 4.003221  | 4.907814  | -3.013305 |
| H | 3.253655  | 4.526331  | 1.007085  |
| H | 4.550746  | 0.215193  | -3.108319 |
| O | -3.513295 | -4.373767 | -3.570288 |
| O | -0.326212 | -4.008851 | -2.501002 |
| O | -4.707735 | -2.254087 | -2.163397 |
| O | -1.674120 | -2.251941 | -2.861933 |
| O | -4.135768 | -2.075574 | -0.003506 |
| C | -2.694376 | -4.389998 | -2.419515 |
| C | -3.484375 | -4.056791 | -1.135385 |
| C | -1.511659 | -3.428783 | -2.609963 |
| C | -4.154426 | -2.701629 | -1.155732 |
| H | -2.299272 | -5.402006 | -2.326945 |
| H | -2.859042 | -4.133411 | -0.248043 |
| H | -4.285011 | -4.799145 | -1.047927 |
| H | -4.030705 | -3.555921 | -3.529228 |
| H | 0.390963  | -3.335859 | -2.624158 |
| H | -5.405521 | -0.756284 | -2.302470 |
| O | -7.205015 | 2.243877  | 1.047730  |
| O | -4.585439 | 4.013307  | -0.676281 |
| O | -5.380973 | 0.325758  | -0.211973 |
| O | -4.714230 | 3.294842  | 1.457957  |
| O | -5.816919 | 0.149003  | -2.408367 |
| C | -6.588179 | 2.910372  | -0.021704 |
| C | -6.601285 | 2.089676  | -1.322513 |
| C | -5.189352 | 3.410770  | 0.354153  |
| C | -5.868006 | 0.773624  | -1.243044 |
| H | -7.180988 | 3.811762  | -0.212618 |
| H | -6.190443 | 2.666104  | -2.154065 |
| H | -7.639338 | 1.857898  | -1.579699 |
| H | -6.540717 | 1.662342  | 1.438449  |
| H | -3.706824 | 4.357579  | -0.383889 |
| H | -4.599061 | -1.195816 | -0.068152 |
| C | -1.055640 | 1.854413  | -3.062608 |
| N | -1.403364 | 0.430971  | -3.321202 |



|   |           |           |           |
|---|-----------|-----------|-----------|
| C | -2.581794 | 0.245274  | -4.214654 |
| H | -0.862874 | 2.344711  | -4.016163 |
| H | -0.160332 | 1.879562  | -2.447759 |
| H | -1.880996 | 2.340104  | -2.544250 |
| H | -1.558260 | -0.060262 | -2.430188 |
| H | -2.363925 | 0.706701  | -5.177166 |
| H | -3.455960 | 0.713381  | -3.763853 |
| H | -2.747623 | -0.821414 | -4.329325 |
| C | 2.930023  | 1.003328  | 2.344601  |
| N | 2.352702  | -0.316584 | 2.725890  |
| C | 2.474271  | -0.644127 | 4.175294  |
| H | 2.358259  | 1.791313  | 2.830112  |
| H | 2.888255  | 1.094001  | 1.262240  |
| H | 3.970363  | 1.031791  | 2.666035  |
| H | 2.823224  | -1.065106 | 2.159875  |
| H | 1.967877  | 0.138380  | 4.743127  |
| H | 3.532243  | -0.700446 | 4.429506  |
| H | 1.999981  | -1.610262 | 4.344670  |
| C | -0.681685 | 1.151689  | 5.829979  |
| N | 0.286283  | 1.841854  | 4.979705  |
| C | 0.683721  | 3.139129  | 5.518158  |
| H | -0.217454 | 0.897224  | 6.788144  |
| H | -0.996677 | 0.220583  | 5.354342  |
| H | -1.583142 | 1.749114  | 6.046566  |
| H | -0.111384 | 1.974749  | 4.054146  |
| H | 1.246075  | 3.000570  | 6.447016  |
| H | -0.168404 | 3.803374  | 5.747595  |
| H | 1.335648  | 3.652009  | 4.806662  |
| C | 1.659105  | -5.103488 | 0.219512  |
| N | 2.364039  | -4.668295 | 1.457196  |
| C | 3.366171  | -5.639837 | 1.967669  |
| H | 2.395617  | -5.247965 | -0.567292 |
| H | 0.959149  | -4.325615 | -0.076953 |
| H | 1.120761  | -6.029946 | 0.420415  |
| H | 1.671022  | -4.457591 | 2.192833  |
| H | 4.130149  | -5.786217 | 1.205622  |
| H | 2.876923  | -6.585772 | 2.199311  |
| H | 3.825504  | -5.226379 | 2.863803  |

## References

1. M. J. McGrath, T. Olenius, I. K. Ortega, V. Loukonen, P. Paasonen, T. Kurtén, M. Kulmala and H. Vehkamäki, *Atmos. Chem. Phys.*, 2011, **12**, 2345-2355.
2. A. Kürten, T. Jokinen, M. Simon, M. Sipilä, N. Sarnela, H. Junninen, A. Adamov, J. Almeida, A. Amorim, F. Bianchi, et al., *Proc. Natl. Acad. Sci.*, 2014, **111**, 15019-15024.
3. J. Almeida, S. Schobesberger, A. Kürten, I. K. Ortega, O. Kupiainen-Määttä, A. P. Praplan, A. Adamov, A. Amorim, F. Bianchi, M. Breitenlechner, et al., *Nature*, 2013, **502**, 359-363.
